# Supplementary material for: Creation of an immiscible OsPd solid solution as a Rh-free catalyst with NOx reduction performance exceeding that of Rh
Source: Royal Society of Chemistry journal article supplement (doi:10.1039/d5ta01068c), 2025-01-01
Supplement: d5ta01068c2.zip [file d5ta01068c2.zip]

## Sheet: Sheet1
	the 1st curve (0.5 min)			the 2nd curve (1.5 min)			the 3rd curve (2.5 min)			the 4th curve (3.5 min)			the 5th curve (4.5 min)			the 6th curve (5.5 min)			the 7th curve (6.5 min)			the 8th curve (7.5 min)			the 9th curve (8.5 min)			the 10th curve (9.5 min)			the 11th curve (10.5 min)			the 12th curve (12.5 min)
	Wavenumber (cm-1)	Absorbance (a.u.)		Wavenumber (cm-1)	Absorbance (a.u.)		Wavenumber (cm-1)	Absorbance (a.u.)		Wavenumber (cm-1)	Absorbance (a.u.)		Wavenumber (cm-1)	Absorbance (a.u.)		Wavenumber (cm-1)	Absorbance (a.u.)		Wavenumber (cm-1)	Absorbance (a.u.)		Wavenumber (cm-1)	Absorbance (a.u.)		Wavenumber (cm-1)	Absorbance (a.u.)		Wavenumber (cm-1)	Absorbance (a.u.)		Wavenumber (cm-1)	Absorbance (a.u.)		Wavenumber (cm-1)	Absorbance (a.u.)
	649.904	-0.0206377		649.904	-0.0139793		649.904	-0.00727024		649.904	-0.00972268		649.904	-0.00637502		649.904	-0.0146759		649.904	-0.0129607		649.904	-0.0133576		649.904	-0.0103354		649.904	-0.0140045		649.904	-0.0117143		649.904	-0.0225114
	650.386	-0.0202161		650.386	-0.0122042		650.386	-0.00714523		650.386	-0.00931949		650.386	-0.00792355		650.386	-0.0149689		650.386	-0.0140498		650.386	-0.0138506		650.386	-0.0107662		650.386	-0.014292		650.386	-0.0134402		650.386	-0.02248
	650.868	-0.0186552		650.868	-0.0101869		650.868	-0.00728513		650.868	-0.00887503		650.868	-0.00948055		650.868	-0.0151296		650.868	-0.0153108		650.868	-0.014427		650.868	-0.0109573		650.868	-0.0142602		650.868	-0.0150274		650.868	-0.0221238
	651.35	-0.0161163		651.35	-0.00840379		651.35	-0.00768188		651.35	-0.00843512		651.35	-0.0108541		651.35	-0.01534		651.35	-0.0164848		651.35	-0.0150978		651.35	-0.0108506		651.35	-0.0139146		651.35	-0.016343		651.35	-0.0216279
	651.832	-0.0129962		651.832	-0.00730918		651.832	-0.00831727		651.832	-0.00806759		651.832	-0.0119659		651.832	-0.0157219		651.832	-0.017378		651.832	-0.0158505		651.832	-0.0105129		651.832	-0.0133445		651.832	-0.0174247		651.832	-0.0211572
	652.315	-0.00984254		652.315	-0.00721025		652.315	-0.00913207		652.315	-0.00784175		652.315	-0.0128447		652.315	-0.0163104		652.315	-0.0178807		652.315	-0.0166459		652.315	-0.0101226		652.315	-0.0127106		652.315	-0.0184231		652.315	-0.0207944
	652.797	-0.00720953		652.797	-0.00816505		652.797	-0.00998692		652.797	-0.00778789		652.797	-0.0135712		652.797	-0.0170327		652.797	-0.0179728		652.797	-0.0173973		652.797	-0.00990327		652.797	-0.0121912		652.797	-0.0194813		652.797	-0.0205039
	653.279	-0.00548979		653.279	-0.00992494		653.279	-0.010659		653.279	-0.00786407		653.279	-0.0141962		653.279	-0.0177224		653.279	-0.0176769		653.279	-0.01797		653.279	-0.0100084		653.279	-0.0119244		653.279	-0.0206055		653.279	-0.0201309
	653.761	-0.00480581		653.761	-0.0120028		653.761	-0.0108646		653.761	-0.00794186		653.761	-0.0146883		653.761	-0.0181611		653.761	-0.0170263		653.761	-0.0181854		653.761	-0.0104446		653.761	-0.0119625		653.761	-0.0216096		653.761	-0.0194519
	654.243	-0.00499976		654.243	-0.013811		654.243	-0.010341		654.243	-0.00783787		654.243	-0.0149364		654.243	-0.0181481		654.243	-0.0160415		654.243	-0.0178751		654.243	-0.0110569		654.243	-0.0122637		654.243	-0.0221459		654.243	-0.0182631
	654.725	-0.0057098		654.725	-0.0148462		654.725	-0.00893051		654.725	-0.00736531		654.725	-0.0148096		654.725	-0.0175741		654.725	-0.0147527		654.725	-0.0169253		654.725	-0.0116003		654.725	-0.0127065		654.725	-0.0218213		654.725	-0.016471
	655.207	-0.00649725		655.207	-0.0148484		655.207	-0.00667263		655.207	-0.00640728		655.207	-0.0142393		655.207	-0.0164739		655.207	-0.013219		655.207	-0.0153353		655.207	-0.0118356		655.207	-0.0131379		655.207	-0.0203539		655.207	-0.0141569
	655.689	-0.00698761		655.689	-0.0139		655.689	-0.00383741		655.689	-0.00497644		655.689	-0.0132947		655.689	-0.0150391		655.689	-0.0115698		655.689	-0.0132469		655.689	-0.0116364		655.689	-0.0134265		655.689	-0.017712		655.689	-0.0115949
	656.172	-0.00696965		656.172	-0.0124017		656.172	-0.000890921		656.172	-0.00323042		656.172	-0.0121882		656.172	-0.0135657		656.172	-0.009982		656.172	-0.0109248		656.172	-0.0110349		656.172	-0.0135143		656.172	-0.0141731		656.172	-0.00918404
	656.654	-0.00643859		656.654	-0.010934		656.654	0.00163772		656.654	-0.00143336		656.654	-0.0112068		656.654	-0.012345		656.654	-0.00864279		656.654	-0.00868563		656.654	-0.0102036		656.654	-0.0134347		656.654	-0.0102744		656.654	-0.00733215
	657.136	-0.00556468		657.136	-0.0100409		657.136	0.00330811		657.136	0.000118769		657.136	-0.0105974		657.136	-0.01155		657.136	-0.00768686		657.136	-0.00681686		657.136	-0.00936499		657.136	-0.0133079		657.136	-0.00666108		657.136	-0.00632718
	657.618	-0.00461944		657.618	-0.0100476		657.618	0.00388904		657.618	0.00117201		657.618	-0.0104675		657.618	-0.0111699		657.618	-0.00716886		657.618	-0.00550043		657.618	-0.00871044		657.618	-0.0132969		657.618	-0.00391777		657.618	-0.00626925
	658.1	-0.00388559		658.1	-0.010956		658.1	0.00339039		658.1	0.00155943		658.1	-0.0107426		658.1	-0.0110132		658.1	-0.00705712		658.1	-0.00479942		658.1	-0.00833726		658.1	-0.0135554		658.1	-0.0024267		658.1	-0.00707228
	658.582	-0.00358882		658.582	-0.0124836		658.582	0.00201927		658.582	0.00120879		658.582	-0.0112088		658.582	-0.0107954		658.582	-0.00727513		658.582	-0.00466763		658.582	-0.00826438		658.582	-0.0141803		658.582	-0.00230405		658.582	-0.00852386
	659.064	-0.0038626		659.064	-0.0141789		659.064	7.58173e-05		659.064	0.000122547		659.064	-0.0116111		659.064	-0.0102622		659.064	-0.0077432		659.064	-0.00499318		659.064	-0.00846625		659.064	-0.0151791		659.064	-0.00340009		659.064	-0.0103579
	659.547	-0.00473017		659.547	-0.0155951		659.547	-0.00214503		659.547	-0.00164041		659.547	-0.0117693		659.547	-0.00931651		659.547	-0.00842817		659.547	-0.00563471		659.547	-0.00893142		659.547	-0.0164557		659.547	-0.00534918		659.547	-0.0123305
	660.029	-0.00611416		660.029	-0.0164352		660.029	-0.00444195		660.029	-0.00398419		660.029	-0.011661		660.029	-0.00809162		660.029	-0.00933778		660.029	-0.00646052		660.029	-0.00967488		660.029	-0.0178396		660.029	-0.00767143		660.029	-0.014262
	660.511	-0.00786797		660.511	-0.0166359		660.511	-0.00673391		660.511	-0.00678476		660.511	-0.0114267		660.511	-0.00692139		660.511	-0.0105086		660.511	-0.00736834		660.511	-0.0107215		660.511	-0.0191338		660.511	-0.00990042		660.511	-0.0160444
	660.993	-0.00980947		660.993	-0.0163343		660.993	-0.00903696		660.993	-0.00989492		660.993	-0.0112943		660.993	-0.0062216		660.993	-0.0119519		660.993	-0.00830258		660.993	-0.0120539		660.993	-0.020171		660.993	-0.0116863		660.993	-0.0176187
	661.475	-0.0117457		661.475	-0.0157692		661.475	-0.0113819		661.475	-0.0131281		661.475	-0.011457		661.475	-0.00632229		661.475	-0.0136127		661.475	-0.00923993		661.475	-0.0135627		661.475	-0.0208419		661.475	-0.0128472		661.475	-0.0189268
	661.957	-0.0134815		661.957	-0.0151652		661.957	-0.0137492		661.957	-0.0162603		661.957	-0.0119831		661.957	-0.00733397		661.957	-0.0153535		661.957	-0.0101914		661.957	-0.015038		661.957	-0.0211061		661.957	-0.0133649		661.957	-0.0198904
	662.439	-0.0148202		662.439	-0.0146551		662.439	-0.0160188		662.439	-0.0190283		662.439	-0.0127759		662.439	-0.00908123		662.439	-0.0169655		662.439	-0.0111668		662.439	-0.0162095		662.439	-0.0209696		662.439	-0.0133418		662.439	-0.0204073
	662.921	-0.0155865		662.921	-0.0142615		662.921	-0.0179955		662.921	-0.0211725		662.921	-0.0136191		662.921	-0.0111444		662.921	-0.01822		662.921	-0.0121683		662.921	-0.0168262		662.921	-0.0204775		662.921	-0.012954		662.921	-0.0203841
	663.404	-0.0156724		663.404	-0.013931		663.404	-0.0194708		663.404	-0.0225026		663.404	-0.0142749		663.404	-0.0129897		663.404	-0.0189397		663.404	-0.0131765		663.404	-0.0167571		663.404	-0.0196907		663.404	-0.0123899		663.404	-0.0197932
	663.886	-0.0150748		663.886	-0.0135787		663.886	-0.0203108		663.886	-0.0229538		663.886	-0.014582		663.886	-0.0141476		663.886	-0.0190489		663.886	-0.0141495		663.886	-0.0160368		663.886	-0.0186837		663.886	-0.0117918		663.886	-0.0186922
	664.368	-0.0139023		664.368	-0.0131291		664.368	-0.0204929		664.368	-0.0225934		664.368	-0.0145127		664.368	-0.0143461		664.368	-0.0185779		664.368	-0.0150233		664.368	-0.0148542		664.368	-0.0175197		664.368	-0.0112163		664.368	-0.0172084
	664.85	-0.0123414		664.85	-0.0125214		664.85	-0.0200953		664.85	-0.0215728		664.85	-0.0141589		664.85	-0.0135475		664.85	-0.0176193		664.85	-0.0157318		664.85	-0.0134602		664.85	-0.0162533		664.85	-0.0106242		664.85	-0.0154833
	665.332	-0.0106012		665.332	-0.0117		665.332	-0.0192335		665.332	-0.0200488		665.332	-0.0136665		665.332	-0.0118925		665.332	-0.016267		665.332	-0.0161993		665.332	-0.0120835		665.332	-0.0149218		665.332	-0.00990282		665.332	-0.0136207
	665.814	-0.00888055		665.814	-0.0105867		665.814	-0.0180033		665.814	-0.018134		665.814	-0.0131733		665.814	-0.00961574		665.814	-0.014572		665.814	-0.0163546		665.814	-0.0108807		665.814	-0.0135686		665.814	-0.00890775		665.814	-0.0116642
	666.296	-0.00734964		666.296	-0.00908402		666.296	-0.0164405		666.296	-0.0158871		666.296	-0.0127553		666.296	-0.007003		666.296	-0.0125461		666.296	-0.016126		666.296	-0.00994065		666.296	-0.0122654		666.296	-0.00752191		666.296	-0.0096242
	666.778	-0.00616192		666.778	-0.00712124		666.778	-0.0145494		666.778	-0.0133879		666.778	-0.0124069		666.778	-0.00440883		666.778	-0.0102247		666.778	-0.0154735		666.778	-0.00932371		666.778	-0.0111625		666.778	-0.00575502		666.778	-0.00755249
	667.26	-0.00544192		667.26	-0.00478372		667.26	-0.0123696		667.26	-0.0108682		667.26	-0.0120332		667.26	-0.00227752		667.26	-0.0077958		667.26	-0.0144472		667.26	-0.00910709		667.26	-0.0104887		667.26	-0.00388191		667.26	-0.00566532
	667.743	-0.00523354		667.743	-0.00245992		667.743	-0.0101132		667.743	-0.00883517		667.743	-0.0114987		667.743	-0.00108379		667.743	-0.00568471		667.743	-0.0132635		667.743	-0.00938046		667.743	-0.0104789		667.743	-0.00251404		667.743	-0.00440938
	668.225	-0.00542916		668.225	-0.00080375		668.225	-0.00818447		668.225	-0.0079199		668.225	-0.0107393		668.225	-0.00104726		668.225	-0.00441486		668.225	-0.01226		668.225	-0.0101536		668.225	-0.0111416		668.225	-0.00234251		668.225	-0.00427656
	668.707	-0.00579105		668.707	-0.000286349		668.707	-0.00695967		668.707	-0.00840318		668.707	-0.00984254		668.707	-0.00188177		668.707	-0.00415488		668.707	-0.0116606		668.707	-0.0112342		668.707	-0.0121311		668.707	-0.00355103		668.707	-0.00537206
	669.189	-0.00611089		669.189	-0.000810398		669.189	-0.00648625		669.189	-0.00992831		669.189	-0.00898306		669.189	-0.00296888		669.189	-0.00450121		669.189	-0.0113669		669.189	-0.01229		669.189	-0.0129536		669.189	-0.00561374		669.189	-0.00724883
	669.671	-0.00631856		669.671	-0.00186409		669.671	-0.00651765		669.671	-0.0118235		669.671	-0.00828581		669.671	-0.003807		669.671	-0.00479552		669.671	-0.0110848		669.671	-0.0130247		669.671	-0.0133046		669.671	-0.007764		669.671	-0.00926939
	670.153	-0.00643966		670.153	-0.00295239		670.153	-0.00673563		670.153	-0.0135247		670.153	-0.00777946		670.153	-0.00419545		670.153	-0.0045342		670.153	-0.010542		670.153	-0.0132955		670.153	-0.0131487		670.153	-0.00948343		670.153	-0.0109696
	670.635	-0.00651484		670.635	-0.00379744		670.635	-0.00691425		670.635	-0.0147186		670.635	-0.00744789		670.635	-0.00414586		670.635	-0.00349825		670.635	-0.00961143		670.635	-0.013099		670.635	-0.0126177		670.635	-0.0105918		670.635	-0.0121366
	671.117	-0.00656635		671.117	-0.00434663		671.117	-0.00693596		671.117	-0.0152947		671.117	-0.00729116		671.117	-0.00375438		671.117	-0.00174029		671.117	-0.00831415		671.117	-0.0125531		671.117	-0.011907		671.117	-0.0111456		671.117	-0.0127528
	671.6	-0.00660042		671.6	-0.00470831		671.6	-0.00677713		671.6	-0.0152864		671.6	-0.00735029		671.6	-0.00314865		671.6	0.000467972		671.6	-0.00680296		671.6	-0.0118737		671.6	-0.0112363		671.6	-0.0113239		671.6	-0.0129324
	672.082	-0.00663106		672.082	-0.00509412		672.082	-0.00647505		672.082	-0.0148347		672.082	-0.00769347		672.082	-0.00247062		672.082	0.00267331		672.082	-0.00532117		672.082	-0.0113476		672.082	-0.01081		672.082	-0.0113587		672.082	-0.0128908
	672.564	-0.00670676		672.564	-0.00574518		672.564	-0.0061151		672.564	-0.014169		672.564	-0.00838257		672.564	-0.0018765		672.564	0.00432826		672.564	-0.00415515		672.564	-0.0112528		672.564	-0.0107934		672.564	-0.0114722		672.564	-0.0129127
	673.046	-0.00691669		673.046	-0.00686105		673.046	-0.00580678		673.046	-0.0135524		673.046	-0.0094291		673.046	-0.00152747		673.046	0.00492969		673.046	-0.0035554		673.046	-0.0117578		673.046	-0.0112705		673.046	-0.0118246		673.046	-0.0132851
	673.528	-0.00737254		673.528	-0.0085093		673.528	-0.00565927		673.528	-0.013209		673.528	-0.0107533		673.528	-0.00155461		673.528	0.00419288		673.528	-0.00366167		673.528	-0.0128149		673.528	-0.0122154		673.528	-0.0124612		673.528	-0.014204
	674.01	-0.00816297		674.01	-0.0105963		674.01	-0.00575662		674.01	-0.0132488		674.01	-0.012181		674.01	-0.00203252		674.01	0.00215631		674.01	-0.00445638		674.01	-0.0141445		674.01	-0.0134908		674.01	-0.0133086		674.01	-0.0156907
	674.492	-0.00930707		674.492	-0.012883		674.492	-0.00615447		674.492	-0.013636		674.492	-0.0134828		674.492	-0.00295795		674.492	-0.000814234		674.492	-0.00578324		674.492	-0.0153028		674.492	-0.01488		674.492	-0.0142092		674.492	-0.0175581
	674.975	-0.0107272		674.975	-0.0150548		674.975	-0.00687022		674.975	-0.0142085		674.975	-0.0144409		674.975	-0.00424499		674.975	-0.00415305		674.975	-0.00740069		674.975	-0.0158386		674.975	-0.0161261		674.975	-0.0149885		674.975	-0.0194508
	675.457	-0.012263		675.457	-0.0168104		675.457	-0.00788945		675.457	-0.0147483		675.457	-0.0149239		675.457	-0.005746		675.457	-0.00725923		675.457	-0.00905913		675.457	-0.0154637		675.457	-0.0169884		675.457	-0.0155207		675.457	-0.0209434
	675.939	-0.0137292		675.939	-0.0179494		675.939	-0.00916101		675.939	-0.0150663		675.939	-0.0149436		675.939	-0.00729224		675.939	-0.0096836		675.939	-0.0105691		675.939	-0.0141812		675.939	-0.0172898		675.939	-0.0157796		675.939	-0.0216755
	676.421	-0.0150016		676.421	-0.0184137		676.421	-0.0106082		676.421	-0.0150781		676.421	-0.0146607		676.421	-0.00874256		676.421	-0.0112385		676.421	-0.0118457		676.421	-0.0123104		676.421	-0.0169548		676.421	-0.0158395		676.421	-0.0214746
	676.903	-0.016068		676.903	-0.0182827		676.903	-0.0121279		676.903	-0.0148261		676.903	-0.0143322		676.903	-0.0100246		676.903	-0.0120235		676.903	-0.0129078		676.903	-0.0103788		676.903	-0.0160177		676.903	-0.0158423		676.903	-0.0204098
	677.385	-0.0170299		677.385	-0.0177108		677.385	-0.013616		677.385	-0.014449		677.385	-0.0142198		677.385	-0.0111417		677.385	-0.0123333		677.385	-0.0138458		677.385	-0.00892697		677.385	-0.0146088		677.385	-0.0159257		677.385	-0.0187678
	677.867	-0.0180266		677.867	-0.0168606		677.867	-0.014969		677.867	-0.0141136		677.867	-0.0144959		677.867	-0.0121467		677.867	-0.0125185		677.867	-0.0147591		677.867	-0.00831805		677.867	-0.0129129		677.867	-0.0161626		677.867	-0.0169504
	678.349	-0.0191267		678.349	-0.0158436		678.349	-0.0161004		678.349	-0.0139414		678.349	-0.015182		678.349	-0.0130949		678.349	-0.0128368		678.349	-0.0157024		678.349	-0.00861424		678.349	-0.0111328		678.349	-0.0165245		678.349	-0.0153472
	678.832	-0.0202358		678.832	-0.0147087		678.832	-0.0169357		678.832	-0.0139539		678.832	-0.0161412		678.832	-0.0139897		678.832	-0.0133658		678.832	-0.0166414		678.832	-0.00957912		678.832	-0.00944394		678.832	-0.016876		678.832	-0.0142303
	679.314	-0.0210666		679.314	-0.013455		679.314	-0.0174168		679.314	-0.0140589		679.314	-0.0171128		679.314	-0.0147554		679.314	-0.0139812		679.314	-0.0174454		679.314	-0.0107799		679.314	-0.0079688		679.314	-0.017008		679.314	-0.0136817
	679.796	-0.0212135		679.796	-0.0120739		679.796	-0.0175016		679.796	-0.0140812		679.796	-0.0177916		679.796	-0.0152473		679.796	-0.0144131		679.796	-0.017908		679.796	-0.0117576		679.796	-0.00675162		679.796	-0.0167009		679.796	-0.0135852
	680.278	-0.0203005		680.278	-0.0105686		680.278	-0.0171639		680.278	-0.013813		680.278	-0.0179121		680.278	-0.0152958		680.278	-0.0143565		680.278	-0.0178088		680.278	-0.0121831		680.278	-0.00575875		680.278	-0.0157899		680.278	-0.0136824
	680.76	-0.0181523		680.76	-0.00898144		680.76	-0.0164036		680.76	-0.0130842		680.76	-0.0173288		680.76	-0.0147835		680.76	-0.0135971		680.76	-0.0169812		680.76	-0.0119635		680.76	-0.00490368		680.76	-0.0142231		680.76	-0.0136726
	681.242	-0.0149031		681.242	-0.00737714		681.242	-0.0152544		681.242	-0.0118148		681.242	-0.0160446		681.242	-0.0137031		681.242	-0.0120901		681.242	-0.0153788		681.242	-0.0112412		681.242	-0.00409594		681.242	-0.0120816		681.242	-0.0133097
	681.724	-0.0110011		681.724	-0.00584666		681.724	-0.0137962		681.724	-0.0100423		681.724	-0.0142061		681.724	-0.0121988		681.724	-0.00999505		681.724	-0.0131057		681.724	-0.010322		681.724	-0.00329892		681.724	-0.00957452		681.724	-0.0124782
	682.206	-0.00710794		682.206	-0.00449111		682.206	-0.0121681		682.206	-0.00791594		682.206	-0.0120651		682.206	-0.0105594		682.206	-0.00764294		682.206	-0.0104247		682.206	-0.00955669		682.206	-0.00257475		682.206	-0.00700744		682.206	-0.0112049
	682.688	-0.00392289		682.688	-0.00342711		682.688	-0.0105631		682.688	-0.00567445		682.688	-0.00992426		682.688	-0.00916665		682.688	-0.00547805		682.688	-0.00771619		682.688	-0.0092365		682.688	-0.00208053		682.688	-0.0047308		682.688	-0.00964572
	683.171	-0.00198641		683.171	-0.00277303		683.171	-0.00921191		683.171	-0.00360726		683.171	-0.00807679		683.171	-0.00841416		683.171	-0.00395169		683.171	-0.00541699		683.171	-0.00952032		683.171	-0.00204122		683.171	-0.00307874		683.171	-0.00803741
	683.653	-0.00152005		683.653	-0.00263378		683.653	-0.00832722		683.653	-0.00199696		683.653	-0.0067417		683.653	-0.00859413		683.653	-0.00341173		683.653	-0.00391232		683.653	-0.0104077		683.653	-0.00266588		683.653	-0.00229884		683.653	-0.00663556
	684.135	-0.00237695		684.135	-0.00306256		684.135	-0.00805029		684.135	-0.00106386		684.135	-0.00600904		684.135	-0.00979813		684.135	-0.00399585		684.135	-0.00343244		684.135	-0.0117482		684.135	-0.00406499		684.135	-0.00248285		684.135	-0.00565679
	684.617	-0.00411622		684.617	-0.00403032		684.617	-0.00838956		684.617	-0.000915753		684.617	-0.00581603		684.617	-0.0118602		684.617	-0.00558087		684.617	-0.00396866		684.617	-0.0132777		684.617	-0.00617734		684.617	-0.00353792		684.617	-0.00522588
	685.099	-0.00617505		685.099	-0.00540184		685.099	-0.00921648		685.099	-0.00153645		685.099	-0.00597656		685.099	-0.0143841		685.099	-0.00780641		685.099	-0.00528611		685.099	-0.0146774		685.099	-0.00876321		685.099	-0.00520244		685.099	-0.00536417
	685.581	-0.00803601		685.581	-0.00694784		685.581	-0.0102823		685.581	-0.00279732		685.581	-0.00624038		685.581	-0.016823		685.581	-0.0101652		685.581	-0.00697907		685.581	-0.0156253		685.581	-0.0114323		685.581	-0.00710149		685.581	-0.0059912
	686.063	-0.00934813		686.063	-0.0083786		686.063	-0.0112833		686.063	-0.00449538		686.063	-0.00637309		686.063	-0.0186073		686.063	-0.0121263		686.063	-0.0085915		686.063	-0.0158422		686.063	-0.0137331		686.063	-0.00882474		686.063	-0.00694718
	686.545	-0.00996617		686.545	-0.00940864		686.545	-0.011921		686.545	-0.00639712		686.545	-0.00622548		686.545	-0.0192665		686.545	-0.0132721		686.545	-0.00973603		686.545	-0.0151503		686.545	-0.0152414		686.545	-0.0100102		686.545	-0.00802674
	687.028	-0.00993288		687.028	-0.00983211		687.028	-0.0119749		687.028	-0.00828093		687.028	-0.00577552		687.028	-0.0185525		687.028	-0.013408		687.028	-0.0102016		687.028	-0.0135248		687.028	-0.0156714		687.028	-0.0104212		687.028	-0.00901103
	687.51	-0.00942478		687.51	-0.0095961		687.51	-0.01135		687.51	-0.00997352		687.51	-0.00512539		687.51	-0.0165166		687.51	-0.0126282		687.51	-0.0100159		687.51	-0.0111383		687.51	-0.014952		687.51	-0.0100097		687.51	-0.00970849
	687.992	-0.0086805		687.992	-0.00882591		687.992	-0.0100954		687.992	-0.0113722		687.992	-0.00444802		687.992	-0.0135114		687.992	-0.0112947		687.992	-0.0094338		687.992	-0.00835069		687.992	-0.0132596		687.992	-0.00892989		687.992	-0.00998725
	688.474	-0.00793373		688.474	-0.00779755		688.474	-0.00838078		688.474	-0.0124442		688.474	-0.0039089		688.474	-0.0100999		688.474	-0.00992594		688.474	-0.0088452		688.474	-0.00564262		688.474	-0.0109692		688.474	-0.0074985		688.474	-0.00980173
	688.956	-0.00736567		688.956	-0.00683548		688.956	-0.00644822		688.956	-0.0132053		688.956	-0.00359658		688.956	-0.00688858		688.956	-0.00901739		688.956	-0.00863467		688.956	-0.00349499		688.956	-0.00854452		688.956	-0.00609174		688.956	-0.00919092
	689.438	-0.00708333		689.438	-0.00621026		689.438	-0.00455391		689.438	-0.0136842		689.438	-0.0034992		689.438	-0.0043632		689.438	-0.00888704		689.438	-0.00904005		689.438	-0.00227465		689.438	-0.00640692		689.438	-0.00503678		689.438	-0.0082664
	689.92	-0.00711091		689.92	-0.0060493		689.92	-0.00292909		689.92	-0.0138951		689.92	-0.00352987		689.92	-0.0027731		689.92	-0.00957721		689.92	-0.0100742		689.92	-0.00214664		689.92	-0.00483976		689.92	-0.0045199		689.92	-0.00717939
	690.403	-0.00739219		690.403	-0.00631203		690.403	-0.00175405		690.403	-0.0138255		690.403	-0.00358738		690.403	-0.00210441		690.403	-0.0108747		690.403	-0.0115166		690.403	-0.00305486		690.403	-0.00393649		690.403	-0.00454302		690.403	-0.00610073
	690.885	-0.00779944		690.885	-0.00682048		690.885	-0.00115018		690.885	-0.0134514		690.885	-0.003616		690.885	-0.00213273		690.885	-0.0123971		690.885	-0.0129898		690.885	-0.00475813		690.885	-0.00362727		690.885	-0.00494234		690.885	-0.0051987
	691.367	-0.00815663		691.367	-0.00734638		691.367	-0.00116575		691.367	-0.0127609		691.367	-0.00363729		691.367	-0.00252603		691.367	-0.0137332		691.367	-0.014071		691.367	-0.00690958		691.367	-0.00373539		691.367	-0.00545861		691.367	-0.00461856
	691.849	-0.00828938		691.849	-0.00769844		691.849	-0.0017782		691.849	-0.0117862		691.849	-0.00374206		691.849	-0.0029619		691.849	-0.0145657		691.849	-0.0144237		691.849	-0.009153		691.849	-0.00406101		691.849	-0.00582881		691.849	-0.00446451
	692.331	-0.00808057		692.331	-0.00780162		692.331	-0.00289035		692.331	-0.0106179		692.331	-0.00404808		692.331	-0.00322328		692.331	-0.0147553		692.331	-0.0138848		692.331	-0.0112033		692.331	-0.0044531		692.331	-0.00588357		692.331	-0.00478527
	692.813	-0.00752543		692.813	-0.00771192		692.813	-0.00435237		692.813	-0.00940611		692.813	-0.00464147		692.813	-0.00324127		692.813	-0.014349		692.813	-0.0125113		692.813	-0.0128866		692.813	-0.00485159		692.813	-0.00559965		692.813	-0.00556294
	693.295	-0.0067556		693.295	-0.00758714		693.295	-0.00597695		693.295	-0.00833716		693.295	-0.00553586		693.295	-0.00309398		693.295	-0.013537		693.295	-0.0105491		693.295	-0.0141417		693.295	-0.00527956		693.295	-0.00510525		693.295	-0.0067112
	693.777	-0.00602012		693.777	-0.00760791		693.777	-0.00757375		693.777	-0.00759544		693.777	-0.00665671		693.777	-0.00295815		693.777	-0.0125715		693.777	-0.00836778		693.777	-0.0149778		693.777	-0.00581286		693.777	-0.00463157		693.777	-0.00807806
	694.26	-0.00562529		694.26	-0.00790168		694.26	-0.0089718		694.26	-0.00732491		694.26	-0.00787211		694.26	-0.0030441		694.26	-0.011699		694.26	-0.00636356		694.26	-0.015436		694.26	-0.00652016		694.26	-0.00443756		694.26	-0.00947059
	694.742	-0.00584437		694.742	-0.0084836		694.742	-0.0100539		694.742	-0.00759212		694.742	-0.00903966		694.742	-0.0035323		694.742	-0.0111032		694.742	-0.0048719		694.742	-0.0155555		694.742	-0.00742574		694.742	-0.00472545		694.742	-0.0106879
	695.224	-0.00682156		695.224	-0.00924856		695.224	-0.0107683		695.224	-0.00836382		695.224	-0.0100583		695.224	-0.00451407		695.224	-0.0108825		695.224	-0.00408875		695.224	-0.0153659		695.224	-0.0084825		695.224	-0.00558215		695.224	-0.0115676
	695.706	-0.0085234		695.706	-0.0100193		695.706	-0.0111453		695.706	-0.00951702		695.706	-0.0109029		695.706	-0.0059692		695.706	-0.0110558		695.706	-0.00405658		695.706	-0.0148955		695.706	-0.00959192		695.706	-0.00696557		695.706	-0.0120356
	696.188	-0.0107474		696.188	-0.0106315		696.188	-0.0112856		696.188	-0.0108703		696.188	-0.0116232		696.188	-0.00776943		696.188	-0.0115826		696.188	-0.00468583		696.188	-0.0141962		696.188	-0.0106377		696.188	-0.00874146		696.188	-0.012131
	696.67	-0.0131841		696.67	-0.0110032		696.67	-0.0113387		696.67	-0.0122296		696.67	-0.0123139		696.67	-0.00970476		696.67	-0.0123796		696.67	-0.0058212		696.67	-0.0133527		696.67	-0.0115314		696.67	-0.0107343		696.67	-0.0119997
	697.152	-0.0155016		697.152	-0.0111766		697.152	-0.0114621		697.152	-0.013426		697.152	-0.0130674		697.152	-0.0115284		697.152	-0.0133349		697.152	-0.00729944		697.152	-0.0124861		697.152	-0.0122364		697.152	-0.012777		697.152	-0.0118554
	697.634	-0.01742		697.634	-0.0112994		697.634	-0.0117812		697.634	-0.0143405		697.634	-0.0139342		697.634	-0.0130004		697.634	-0.0143077		697.634	-0.00898549		697.634	-0.0117281		697.634	-0.012775		697.634	-0.0147267		697.634	-0.0119104
	698.116	-0.0187572		698.116	-0.0115649		698.116	-0.0123483		698.116	-0.0149114		698.116	-0.0149047		698.116	-0.0139344		698.116	-0.0151435		698.116	-0.0107763		698.116	-0.0111907		698.116	-0.013201		698.116	-0.0164528		698.116	-0.0123096
	698.599	-0.0194425		698.599	-0.0121172		698.599	-0.0131177		698.599	-0.0151279		698.599	-0.0159142		698.599	-0.0142423		698.599	-0.015695		698.599	-0.0125851		698.599	-0.0109252		698.599	-0.0135722		698.599	-0.0178199		698.599	-0.0130732
	699.081	-0.0195055		699.081	-0.0129821		699.081	-0.0139431		699.081	-0.0150163		699.081	-0.0168694		699.081	-0.0139567		699.081	-0.0158683		699.081	-0.0143185		699.081	-0.0109019		699.081	-0.0139143		699.081	-0.0186823		699.081	-0.0140793
	699.563	-0.0190443		699.563	-0.0140292		699.563	-0.0146113		699.563	-0.0146256		699.563	-0.0176798		699.563	-0.0132324		699.563	-0.0156554		699.563	-0.0158759		699.563	-0.0110141		699.563	-0.0142073		699.563	-0.0189035		699.563	-0.0150969
	700.045	-0.0181873		700.045	-0.0150109		700.045	-0.0148933		700.045	-0.0140079		700.045	-0.0182823		700.045	-0.0123029		700.045	-0.015152		700.045	-0.0171527		700.045	-0.0111127		700.045	-0.0143874		700.045	-0.0184		700.045	-0.0158526
	700.527	-0.0170603		700.527	-0.0156381		700.527	-0.0146114		700.527	-0.0132158		700.527	-0.0186492		700.527	-0.0114204		700.527	-0.0145326		700.527	-0.0180698		700.527	-0.0110559		700.527	-0.014377		700.527	-0.0171823		700.527	-0.0161102
	701.009	-0.0157658		701.009	-0.0156788		701.009	-0.0136861		701.009	-0.0122995		701.009	-0.0187822		701.009	-0.0107907		701.009	-0.0139991		701.009	-0.0185877		701.009	-0.0107619		701.009	-0.0141139		701.009	-0.0153812		701.009	-0.0157329
	701.491	-0.0143805		701.491	-0.0150293		701.491	-0.0121663		701.491	-0.0113125		701.491	-0.0186996		701.491	-0.0105266		701.491	-0.0137051		701.491	-0.0187173		701.491	-0.0102302		701.491	-0.0135835		701.491	-0.013238		701.491	-0.0147116
	701.973	-0.0129639		701.973	-0.0137583		701.973	-0.0102258		701.973	-0.0103175		701.973	-0.0184289		701.973	-0.0106338		701.973	-0.0137059		701.973	-0.0185175		701.973	-0.009547		701.973	-0.0128296		701.973	-0.0110621		701.973	-0.0131719
	702.456	-0.0115714		702.456	-0.012094		702.456	-0.00813387		702.456	-0.00938539		702.456	-0.0179995		702.456	-0.01103		702.456	-0.0139254		702.456	-0.0180767		702.456	-0.00885341		702.456	-0.0119532		702.456	-0.00915008		702.456	-0.0113427
	702.938	-0.0102659		702.938	-0.0103705		702.938	-0.00619109		702.938	-0.0085864		702.938	-0.0174454		702.938	-0.0115877		702.938	-0.0141814		702.938	-0.0174885		702.938	-0.00830085		702.938	-0.0110839		702.938	-0.00770024		702.938	-0.00951157
	703.42	-0.00912182		703.42	-0.008936		703.42	-0.00465813		703.42	-0.00797957		703.42	-0.0167999		703.42	-0.0121857		703.42	-0.0142529		703.42	-0.0168329		703.42	-0.00799684		703.42	-0.0103408		703.42	-0.00675106		703.42	-0.00795699
	703.902	-0.00822114		703.902	-0.00806232		703.902	-0.00369416		703.902	-0.00760156		703.902	-0.0160955		703.902	-0.0127473		703.902	-0.0139686		703.902	-0.0161573		703.902	-0.00797196		703.902	-0.00979486		703.902	-0.00618188		703.902	-0.0068921
	704.384	-0.00764294		704.384	-0.0078723		704.384	-0.00333315		704.384	-0.00746691		704.384	-0.0153609		704.384	-0.0132477		704.384	-0.0132765		704.384	-0.0154883		704.384	-0.0081727		704.384	-0.00944874		704.384	-0.00577078		704.384	-0.00642295
	704.866	-0.00743857		704.866	-0.00833138		704.866	-0.00349756		704.866	-0.00757056		704.866	-0.0146175		704.866	-0.0136964		704.866	-0.0122767		704.866	-0.0148366		704.866	-0.00849715		704.866	-0.00923932		704.866	-0.00529783		704.866	-0.00654295
	705.348	-0.00761677		705.348	-0.00927571		705.348	-0.004047		705.348	-0.00790159		705.348	-0.013888		705.348	-0.0141089		705.348	-0.011195		705.348	-0.0142252		705.348	-0.008835		705.348	-0.00907321		705.348	-0.00463623		705.348	-0.00714777
	705.83	-0.00812285		705.83	-0.0104751		705.83	-0.00482138		705.83	-0.00844783		705.83	-0.0132005		705.83	-0.01448		705.83	-0.0103223		705.83	-0.0136946		705.83	-0.00911799		705.83	-0.00886429		705.83	-0.00380411		705.83	-0.00807582
	706.313	-0.00884594		706.313	-0.0117007		706.313	-0.00568776		706.313	-0.00919913		706.313	-0.0125949		706.313	-0.0147831		706.313	-0.00991752		706.313	-0.0133063		706.313	-0.00934913		706.313	-0.00858185		706.313	-0.00296091		706.313	-0.0091528
	706.795	-0.00964157		706.795	-0.012783		706.795	-0.00655783		706.795	-0.0101453		706.795	-0.0121223		706.795	-0.0149885		706.795	-0.0101303		706.795	-0.013127		706.795	-0.00960333		706.795	-0.00827199		706.795	-0.00234917		706.795	-0.0102383
	707.277	-0.0103771		707.277	-0.0136357		707.277	-0.00739825		707.277	-0.0112709		707.277	-0.0118354		707.277	-0.0150901		707.277	-0.010954		707.277	-0.0132101		707.277	-0.00999722		707.277	-0.00805607		707.277	-0.0022018		707.277	-0.0112597
	707.759	-0.0109701		707.759	-0.0142555		707.759	-0.00821353		707.759	-0.0125466		707.759	-0.0117743		707.759	-0.0151276		707.759	-0.012244		707.759	-0.0135735		707.759	-0.0106419		707.759	-0.00809006		707.759	-0.00266516		707.759	-0.0122195
	708.241	-0.0114086		708.241	-0.0146875		708.241	-0.00903193		708.241	-0.0139263		708.241	-0.0119517		708.241	-0.0151771		708.241	-0.0137713		708.241	-0.014195		708.241	-0.011592		708.241	-0.0085133		708.241	-0.00375418		708.241	-0.0131754
	708.723	-0.0117384		708.723	-0.0149884		708.723	-0.0098796		708.723	-0.015342		708.723	-0.0123449		708.723	-0.0153274		708.723	-0.0152925		708.723	-0.0150052		708.723	-0.0128184		708.723	-0.00939012		708.723	-0.0053588		708.723	-0.0142002
	709.205	-0.0120199		709.205	-0.0151901		709.205	-0.0107587		709.205	-0.016695		709.205	-0.0128866		709.205	-0.0156349		709.205	-0.0165939		709.205	-0.0158881		709.205	-0.0141933		709.205	-0.0106722		709.205	-0.00727405		709.205	-0.0153222
	709.687	-0.0122846		709.687	-0.0152901		709.687	-0.0116278		709.687	-0.0178639		709.687	-0.0134691		709.687	-0.0160873		709.687	-0.0175254		709.687	-0.0166858		709.687	-0.0155138		709.687	-0.0121864		709.687	-0.00924733		709.687	-0.0164919
	710.17	-0.0125007		710.17	-0.0152567		710.17	-0.0123988		710.17	-0.0187136		710.17	-0.0139535		710.17	-0.0165908		710.17	-0.0179984		710.17	-0.017215		710.17	-0.0165399		710.17	-0.013673		710.17	-0.0110247		710.17	-0.0175636
	710.652	-0.0125717		710.652	-0.0150541		710.652	-0.0129385		710.652	-0.0191213		710.652	-0.0141918		710.652	-0.0169867		710.652	-0.0179841		710.652	-0.0172903		710.652	-0.0170575		710.652	-0.0148448		710.652	-0.0123921		710.652	-0.0183244
	711.134	-0.0123843		711.134	-0.0146739		711.134	-0.0131059		711.134	-0.0190124		711.134	-0.0140586		711.134	-0.0171053		711.134	-0.0175105		711.134	-0.0167721		711.134	-0.016934		711.134	-0.0154806		711.134	-0.0132184		711.134	-0.0185604
	711.616	-0.0118732		711.616	-0.0141619		711.616	-0.0127948		711.616	-0.0183885		711.616	-0.0134861		711.616	-0.0168253		711.616	-0.0166611		711.616	-0.0156064		711.616	-0.0161574		711.616	-0.0154929		711.616	-0.0134789		711.616	-0.0181309
	712.098	-0.0110802		712.098	-0.0136151		712.098	-0.0119846		712.098	-0.0173465		712.098	-0.0124932		712.098	-0.0161153		712.098	-0.0155747		712.098	-0.0138632		712.098	-0.0148445		712.098	-0.0149619		712.098	-0.0132612		712.098	-0.0170327
	712.58	-0.0101723		712.58	-0.0131674		712.58	-0.0107667		712.58	-0.0160701		712.58	-0.0111977		712.58	-0.0150503		712.58	-0.0144437		712.58	-0.0117421		712.58	-0.0132262		712.58	-0.0141115		712.58	-0.0127514		712.58	-0.0154213
	713.062	-0.00940371		713.062	-0.0129473		713.062	-0.00934884		713.062	-0.0147981		713.062	-0.00980727		713.062	-0.0137875		713.062	-0.0134909		713.062	-0.00955176		713.062	-0.0115955		713.062	-0.01325		713.062	-0.012194		713.062	-0.0135824
	713.544	-0.00903898		713.544	-0.0130426		713.544	-0.00802013		713.544	-0.0137749		713.544	-0.00859195		713.544	-0.0125262		713.544	-0.0129413		713.544	-0.00765668		713.544	-0.0102609		713.544	-0.0126813		713.544	-0.0118396		713.544	-0.0118752
	714.027	-0.0092474		714.027	-0.0134644		714.027	-0.00708333		714.027	-0.0131851		714.027	-0.00782066		714.027	-0.0114582		714.027	-0.0129595		714.027	-0.00639856		714.027	-0.00947581		714.027	-0.0126278		714.027	-0.0118764		714.027	-0.0106383
	714.509	-0.0100252		714.509	-0.014139		714.509	-0.00676473		714.509	-0.013093		714.509	-0.00768992		714.509	-0.0107274		714.509	-0.0135949		714.509	-0.00600398		714.509	-0.00938568		714.509	-0.0131677		714.509	-0.0123747		714.509	-0.0101019
	714.991	-0.0111703		714.991	-0.0149187		714.991	-0.00714419		714.991	-0.0134103		714.991	-0.00825326		714.991	-0.0104069		714.991	-0.0147418		714.991	-0.00652261		714.991	-0.00998262		714.991	-0.0142191		714.991	-0.0132555		714.991	-0.0103222
	715.473	-0.0123354		715.473	-0.015621		715.473	-0.00812086		715.473	-0.0139105		715.473	-0.00939009		715.473	-0.0104981		715.473	-0.0161494		715.473	-0.00780885		715.473	-0.0111032		715.473	-0.0155687		715.473	-0.0143159		715.473	-0.0111714
	715.955	-0.0131277		715.955	-0.016067		715.955	-0.00944809		715.955	-0.0142927		715.955	-0.0108287		715.955	-0.0109455		715.955	-0.0174733		715.955	-0.00957111		715.955	-0.012457		715.955	-0.0169342		715.955	-0.0152876		715.955	-0.0123809
	716.437	-0.0132262		716.437	-0.0161203		716.437	-0.0108054		716.437	-0.0142665		716.437	-0.0122168		716.437	-0.0116573		716.437	-0.0183627		716.437	-0.0114515		716.437	-0.0136941		716.437	-0.0180264		716.437	-0.0159219		716.437	-0.0136151
	716.919	-0.0124715		716.919	-0.0157069		716.919	-0.011897		716.919	-0.0136453		716.919	-0.0132147		716.919	-0.0125187		716.919	-0.0185468		716.919	-0.0131166		716.919	-0.0144747		716.919	-0.0186108		716.919	-0.0160664		716.919	-0.0145538
	717.401	-0.0109142		717.401	-0.0148266		717.401	-0.0125237		717.401	-0.0124073		717.401	-0.0135897		717.401	-0.0134001		717.401	-0.0179138		717.401	-0.0143245		717.401	-0.0145477		717.401	-0.0185403		717.401	-0.0157099		717.401	-0.01496
	717.884	-0.00881153		717.884	-0.0135488		717.884	-0.0126313		717.884	-0.0107182		717.884	-0.0132783		717.884	-0.0141683		717.884	-0.0165421		717.884	-0.0149632		717.884	-0.0138096		717.884	-0.0177813		717.884	-0.0149825		717.884	-0.0147226
	718.366	-0.00656716		718.366	-0.0120046		718.366	-0.0123028		718.366	-0.00889269		718.366	-0.0124029		718.366	-0.0146992		718.366	-0.0146912		718.366	-0.0150482		718.366	-0.0123404		718.366	-0.0164125		718.366	-0.0141113		718.366	-0.0138722
	718.848	-0.0046362		718.848	-0.0103707		718.848	-0.0117195		718.848	-0.00730563		718.848	-0.0112298		718.848	-0.0149005		718.848	-0.0127351		718.848	-0.0146976		718.848	-0.0103909		718.848	-0.0146147		718.848	-0.0133438		718.848	-0.0125676
	719.33	-0.00341397		719.33	-0.00885241		719.33	-0.0110888		719.33	-0.00628176		719.33	-0.0100845		719.33	-0.014734		719.33	-0.0110676		719.33	-0.0140839		719.33	-0.0083304		719.33	-0.0126349		719.33	-0.01287		719.33	-0.0110567
	719.812	-0.00314326		719.812	-0.00765176		719.812	-0.0105824		719.812	-0.0060045		719.812	-0.00925379		719.812	-0.0142225		719.812	-0.00999935		719.812	-0.0133899		719.812	-0.00655499		719.812	-0.0107424		719.812	-0.0127702		719.812	-0.00962385
	720.294	-0.00386342		720.294	-0.00694366		720.294	-0.0102909		720.294	-0.00647221		720.294	-0.00891003		720.294	-0.013446		720.294	-0.00969112		720.294	-0.0127732		720.294	-0.0053987		720.294	-0.0091808		720.294	-0.0130086		720.294	-0.0085364
	720.776	-0.00541228		720.776	-0.00684048		720.776	-0.0102198		720.776	-0.00752478		720.776	-0.00908061		720.776	-0.0125207		720.776	-0.0101273		720.776	-0.0123485		720.776	-0.00505053		720.776	-0.00812402		720.776	-0.0134678		720.776	-0.00799349
	721.258	-0.00746753		721.258	-0.00736124		721.258	-0.010304		721.258	-0.00890652		721.258	-0.009665		721.258	-0.0115698		721.258	-0.011147		721.258	-0.0121782		721.258	-0.00551999		721.258	-0.0076405		721.258	-0.0139938		721.258	-0.00809458
	721.74	-0.00963062		721.74	-0.00841201		721.74	-0.0104439		721.74	-0.0103553		721.74	-0.0104836		721.74	-0.0106979		721.74	-0.0124916		721.74	-0.0122687		721.74	-0.006643		721.74	-0.00768822		721.74	-0.0144453		721.74	-0.00882253
	722.223	-0.011528		722.223	-0.0098016		722.223	-0.0105404		722.223	-0.0116758		722.223	-0.0113425		722.223	-0.00997316		722.223	-0.0138826		722.223	-0.0125695		722.223	-0.00814073		722.223	-0.00812925		722.223	-0.014723		722.223	-0.0100557
	722.705	-0.0129086		722.705	-0.011277		722.705	-0.0105274		722.705	-0.0127777		722.705	-0.0120816		722.705	-0.00942666		722.705	-0.0150773		722.705	-0.0129834		722.705	-0.0097047		722.705	-0.00877883		722.705	-0.0147735		722.705	-0.011602
	723.187	-0.0137077		723.187	-0.0125959		723.187	-0.0103897		723.187	-0.0136682		723.187	-0.0126071		723.187	-0.00906799		723.187	-0.0159141		723.187	-0.0133861		723.187	-0.0110793		723.187	-0.00946515		723.187	-0.0145846		723.187	-0.0132505
	723.669	-0.0140495		723.669	-0.0135772		723.669	-0.0101705		723.669	-0.0144085		723.669	-0.0128889		723.669	-0.00889857		723.669	-0.0163162		723.669	-0.013658		723.669	-0.0121096		723.669	-0.0100762		723.669	-0.0141679		723.669	-0.0148128
	724.151	-0.0141936		724.151	-0.0141391		724.151	-0.00995719		724.151	-0.0150577		724.151	-0.0129483		724.151	-0.00892301		724.151	-0.01628		724.151	-0.013712		724.151	-0.012752		724.151	-0.0105768		724.151	-0.0135495		724.151	-0.0161482
	724.633	-0.0144383		724.633	-0.0142995		724.633	-0.00986237		724.633	-0.0156262		724.633	-0.0128332		724.633	-0.00913973		724.633	-0.0158481		724.633	-0.0135197		724.633	-0.0130393		724.633	-0.0109955		724.633	-0.0127682		724.633	-0.01716
	725.115	-0.0150079		725.115	-0.0141534		725.115	-0.00998459		725.115	-0.016061		725.115	-0.0126022		725.115	-0.00952467		725.115	-0.0150877		725.115	-0.0131192		725.115	-0.0130409		725.115	-0.0113822		725.115	-0.0118786		725.115	-0.0177898
	725.598	-0.0159561		725.598	-0.0138259		725.598	-0.0103732		725.598	-0.0162606		725.598	-0.0123059		725.598	-0.0100152		725.598	-0.0140732		725.598	-0.0126051		725.598	-0.0128132		725.598	-0.0117648		725.598	-0.010948		725.598	-0.0179971
	726.08	-0.0171374		726.08	-0.0134291		726.08	-0.0109955		726.08	-0.0161186		726.08	-0.0119766		726.08	-0.010509		726.08	-0.0128769		726.08	-0.012096		726.08	-0.0123833		726.08	-0.0121125		726.08	-0.0100539		726.08	-0.0177598
	726.562	-0.0182511		726.562	-0.0130266		726.562	-0.0117384		726.562	-0.0155737		726.562	-0.0116204		726.562	-0.0108865		726.562	-0.0115691		726.562	-0.0116977		726.562	-0.0117526		726.562	-0.0123376		726.562	-0.00926741		726.562	-0.0170756
	727.044	-0.0189556		727.044	-0.0126355		727.044	-0.0124398		727.044	-0.0146458		727.044	-0.0112196		727.044	-0.0110528		727.044	-0.010226		727.044	-0.0114685		727.044	-0.0109301		727.044	-0.012324		727.044	-0.00864753		727.044	-0.015983
	727.526	-0.0189939		727.526	-0.0122418		727.526	-0.0129461		727.526	-0.0134457		727.526	-0.0107454		727.526	-0.0109719		727.526	-0.00893742		727.526	-0.011411		727.526	-0.00997067		727.526	-0.0119811		727.526	-0.00823528		727.526	-0.0145723
	728.008	-0.0182884		728.008	-0.01184		728.008	-0.0131693		728.008	-0.0121569		728.008	-0.0101819		728.008	-0.0106917		728.008	-0.00781555		728.008	-0.0114836		728.008	-0.00900607		728.008	-0.0112892		728.008	-0.00806131		728.008	-0.0129959
	728.49	-0.0169683		728.49	-0.0114551		728.49	-0.0131266		728.49	-0.0109926		728.49	-0.00954894		728.49	-0.0103345		728.49	-0.0069869		728.49	-0.0116262		728.49	-0.0082308		728.49	-0.0103304		728.49	-0.00814844		728.49	-0.0114512
	728.972	-0.0153331		728.972	-0.0111544		728.972	-0.012938		728.972	-0.0101485		728.972	-0.00892239		728.972	-0.0100578		728.972	-0.00658009		728.972	-0.0117893		728.972	-0.00786495		728.972	-0.00927892		728.972	-0.00851083		728.972	-0.0101539
	729.455	-0.0137556		729.455	-0.0110241		729.455	-0.0127911		729.455	-0.00975268		729.455	-0.00842846		729.455	-0.0100038		729.455	-0.00668356		729.455	-0.0119513		729.455	-0.00807553		729.455	-0.00836291		729.455	-0.0091418		729.455	-0.00928401
	729.937	-0.0125632		729.937	-0.0111413		729.937	-0.0128684		729.937	-0.00983914		729.937	-0.00821623		729.937	-0.0102455		729.937	-0.00731807		729.937	-0.0121219		729.937	-0.00890993		729.937	-0.00779895		729.937	-0.0100004		729.937	-0.00894093
	730.419	-0.0119397		730.419	-0.0115362		730.419	-0.0132804		730.419	-0.0103452		730.419	-0.00840779		730.419	-0.0107637		730.419	-0.00840954		730.419	-0.0123317		730.419	-0.0102554		730.419	-0.00772872		730.419	-0.011001		730.419	-0.00911199
	730.901	-0.0118894		730.901	-0.0121821		730.901	-0.014022		730.901	-0.011137		730.901	-0.00905257		730.901	-0.0114589		730.901	-0.00979872		730.901	-0.0126105		730.901	-0.0118647		730.901	-0.00817949		730.901	-0.012026		730.901	-0.00968409
	731.383	-0.0122719		731.383	-0.0129994		731.383	-0.0149868		731.383	-0.0120574		731.383	-0.0101049		731.383	-0.0121978		731.383	-0.0112768		731.383	-0.0129813		731.383	-0.0134255		731.383	-0.00906714		731.383	-0.0129471		731.383	-0.0104835
	731.865	-0.012878		731.865	-0.0138817		731.865	-0.0160089		731.865	-0.0129593		731.865	-0.0114286		731.865	-0.0128621		731.865	-0.0126318		731.865	-0.0134413		731.865	-0.0146552		731.865	-0.0102213		731.865	-0.0136616		731.865	-0.0113282
	732.347	-0.0135083		732.347	-0.0147215		732.347	-0.0169331		732.347	-0.0137316		732.347	-0.0128317		732.347	-0.0133885		732.347	-0.0136937		732.347	-0.0139647		732.347	-0.0153733		732.347	-0.0114304		732.347	-0.0141178		732.347	-0.012066
	732.83	-0.0140246		732.83	-0.0154276		732.83	-0.01766		732.83	-0.0143074		732.83	-0.0141159		732.83	-0.0137765		732.83	-0.0143774		732.83	-0.0144993		732.83	-0.0155452		732.83	-0.0124812		732.83	-0.0143345		732.83	-0.012604
	733.312	-0.0143596		733.312	-0.0159331		733.312	-0.0181726		733.312	-0.0146569		733.312	-0.0151244		733.312	-0.0140686		733.312	-0.0146907		733.312	-0.0149725		733.312	-0.0152736		733.312	-0.0131965		733.312	-0.0143906		733.312	-0.0129049
	733.794	-0.0144959		733.794	-0.0161894		733.794	-0.0185121		733.794	-0.0147748		733.794	-0.0157717		733.794	-0.0143088		733.794	-0.0147298		733.794	-0.0152938		733.794	-0.0147498		733.794	-0.0134535		733.794	-0.0143941		733.794	-0.0129765
	734.276	-0.0144355		734.276	-0.0161591		734.276	-0.0187403		734.276	-0.0146733		734.276	-0.0160448		734.276	-0.0145046		734.276	-0.01464		734.276	-0.0153746		734.276	-0.0141738		734.276	-0.0132046		734.276	-0.0144389		734.276	-0.0128537
	734.758	-0.0141756		734.758	-0.0158153		734.758	-0.0188907		734.758	-0.0143712		734.758	-0.0159797		734.758	-0.0146077		734.758	-0.0145682		734.758	-0.0151418		734.758	-0.0136837		734.758	-0.0124777		734.758	-0.0145693		734.758	-0.0125807
	735.24	-0.0137053		735.24	-0.0151383		735.24	-0.0189473		735.24	-0.0138968		735.24	-0.0156254		735.24	-0.0145233		735.24	-0.0146144		735.24	-0.0145645		735.24	-0.0133163		735.24	-0.0113718		735.24	-0.0147619		735.24	-0.0122047
	735.722	-0.0130209		735.722	-0.014132		735.722	-0.0188472		735.722	-0.0132863		735.722	-0.0150205		735.722	-0.0141498		735.722	-0.0148041		735.722	-0.0136645		735.722	-0.0130235		735.722	-0.0100419		735.722	-0.0149412		735.722	-0.011772
	736.204	-0.01215		736.204	-0.0128351		736.204	-0.0185177		736.204	-0.0125871		736.204	-0.0141853		736.204	-0.0134259		736.204	-0.0150781		736.204	-0.0125248		736.204	-0.0127123		736.204	-0.0086793		736.204	-0.0150107		736.204	-0.0113234
	736.687	-0.0111616		736.687	-0.0113335		736.687	-0.0179088		736.687	-0.0118521		736.687	-0.0131412		736.687	-0.0123642		736.687	-0.0153165		736.687	-0.0112756		736.687	-0.0123037		736.687	-0.00747505		736.687	-0.0148898		736.687	-0.0108885
	737.169	-0.0101639		737.169	-0.00975861		737.169	-0.0170251		737.169	-0.0111339		737.169	-0.0119312		737.169	-0.0110699		737.169	-0.0153703		737.169	-0.0100668		737.169	-0.0117732		737.169	-0.00658991		737.169	-0.0145398		737.169	-0.010478
	737.651	-0.00927607		737.651	-0.00827108		737.651	-0.0159217		737.651	-0.0104695		737.651	-0.0106333		737.651	-0.0097138		737.651	-0.0151031		737.651	-0.00902596		737.651	-0.0111565		737.651	-0.00611327		737.651	-0.0139711		737.651	-0.0100747
	738.133	-0.00859611		738.133	-0.00703127		738.133	-0.0146903		738.133	-0.00987927		738.133	-0.00935004		738.133	-0.00848497		738.133	-0.014428		738.133	-0.00822644		738.133	-0.0105286		738.133	-0.00604999		738.133	-0.0132287		738.133	-0.00964089
	738.615	-0.00817523		738.615	-0.00617508		738.615	-0.0134314		738.615	-0.00936525		738.615	-0.00818447		738.615	-0.00753233		738.615	-0.0133331		738.615	-0.00767621		738.615	-0.00996617		738.615	-0.00633126		738.615	-0.0123704		738.615	-0.00913979
	739.097	-0.00801298		739.097	-0.00579063		739.097	-0.0122465		739.097	-0.00893106		739.097	-0.00721279		739.097	-0.00692589		739.097	-0.0118884		739.097	-0.00734303		739.097	-0.00951475		739.097	-0.00685274		739.097	-0.0114489		739.097	-0.00856473
	739.579	-0.008067		739.579	-0.00591158		739.579	-0.0112351		739.579	-0.00859215		739.579	-0.0064714		739.579	-0.00664558		739.579	-0.0102367		739.579	-0.00718646		739.579	-0.009183		739.579	-0.00751068		739.579	-0.0105074		739.579	-0.00796366
	740.061	-0.00827277		740.061	-0.0065105		740.061	-0.0105114		740.061	-0.00838566		740.061	-0.00595924		740.061	-0.00660179		740.061	-0.00857129		740.061	-0.00719712		740.061	-0.00895145		740.061	-0.00823828		740.061	-0.00958868		740.061	-0.00744013
	740.543	-0.00856099		740.543	-0.0075014		740.543	-0.0101931		740.543	-0.00836083		740.543	-0.00566074		740.543	-0.00666868		740.543	-0.00710433		740.543	-0.00740616		740.543	-0.00879877		740.543	-0.00900318		740.543	-0.00874652		740.543	-0.0071336
	741.026	-0.00887065		741.026	-0.00874019		741.026	-0.0103773		741.026	-0.00855658		741.026	-0.00555784		741.026	-0.00672878		741.026	-0.00602002		741.026	-0.00786586		741.026	-0.00871759		741.026	-0.00979606		741.026	-0.00804505		741.026	-0.00716788
	741.508	-0.00914521		741.508	-0.0100389		741.508	-0.0110832		741.508	-0.00897501		741.508	-0.00564393		741.508	-0.00670464		741.508	-0.00543616		741.508	-0.00860751		741.508	-0.00872353		741.508	-0.0106008		741.508	-0.00755213		741.508	-0.00759925
	741.99	-0.00934485		741.99	-0.0111973		741.99	-0.012212		741.99	-0.00956392		741.99	-0.00591354		741.99	-0.00657457		741.99	-0.00537189		741.99	-0.00960045		741.99	-0.00883682		741.99	-0.0113716		741.99	-0.00731227		741.99	-0.00837997
	742.472	-0.00944962		742.472	-0.0120507		742.472	-0.0135386		742.472	-0.0102271		742.472	-0.0063488		742.472	-0.0063778		742.472	-0.00576336		742.472	-0.0107344		742.472	-0.00906737		742.472	-0.0120336		742.472	-0.00733625		742.472	-0.00937083
	742.954	-0.00946304		742.954	-0.0124961		742.954	-0.0147551		742.954	-0.0108544		742.954	-0.00690417		742.954	-0.00619282		742.954	-0.00649281		742.954	-0.011842		742.954	-0.00939544		742.954	-0.0124998		742.954	-0.00759075		742.954	-0.0103833
	743.436	-0.00941794		743.436	-0.0125216		743.436	-0.0155546		743.436	-0.0113631		743.436	-0.00751084		743.436	-0.00611925		743.436	-0.0074443		743.436	-0.0127507		743.436	-0.00978012		743.436	-0.0127056		743.436	-0.0080203		743.436	-0.0112508
	743.918	-0.00937099		743.918	-0.0121995		743.918	-0.0157301		743.918	-0.0117349		743.918	-0.0080954		743.918	-0.00625302		743.918	-0.00853585		743.918	-0.0133408		743.918	-0.0101688		743.918	-0.0126449		743.918	-0.00856554		743.918	-0.0118799
	744.4	-0.00939395		744.4	-0.0116647		744.4	-0.0152441		744.4	-0.0120273		744.4	-0.00861102		744.4	-0.00665932		744.4	-0.00974069		744.4	-0.0135915		744.4	-0.0105243		744.4	-0.0123784		744.4	-0.00918625		744.4	-0.012283
	744.883	-0.0095577		744.883	-0.0110707		744.883	-0.0142554		744.883	-0.0123573		744.883	-0.00906607		744.883	-0.0073585		744.883	-0.011064		744.883	-0.0135918		744.883	-0.0108414		744.883	-0.0120309		744.883	-0.0098692		744.883	-0.0125627
	745.365	-0.00991328		745.365	-0.0105469		745.365	-0.0130645		745.365	-0.012851		745.365	-0.00952924		745.365	-0.00831295		745.365	-0.0125046		745.365	-0.0135069		745.365	-0.011153		745.365	-0.0117453		745.365	-0.0106204		745.365	-0.0128622
	745.847	-0.0104834		745.847	-0.0101635		745.847	-0.0120081		745.847	-0.0135888		745.847	-0.0101049		745.847	-0.00943432		745.847	-0.0140115		745.847	-0.0135163		745.847	-0.0115116		745.847	-0.0116357		745.847	-0.0114434		745.847	-0.013301
	746.329	-0.0112599		746.329	-0.00993352		746.329	-0.0113299		746.329	-0.0145557		746.329	-0.0108821		746.329	-0.0106003		746.329	-0.0154597		746.329	-0.0137393		746.329	-0.0119646		746.329	-0.0117441		746.329	-0.0123199		746.329	-0.0139227
	746.811	-0.0122158		746.811	-0.0098348		746.811	-0.0111037		746.811	-0.0156364		746.811	-0.0118849		746.811	-0.0116854		746.811	-0.0166603		746.811	-0.0142014		746.811	-0.0125291		746.811	-0.0120327		746.811	-0.0131999		746.811	-0.0146795
	747.293	-0.0133084		747.293	-0.00985265		747.293	-0.0112261		747.293	-0.0166431		747.293	-0.0130468		747.293	-0.0125867		747.293	-0.0174061		747.293	-0.0148284		747.293	-0.0131856		747.293	-0.0124013		747.293	-0.0140117		747.293	-0.015455
	747.775	-0.0144849		747.775	-0.010007		747.775	-0.0114849		747.775	-0.0173708		747.775	-0.0142156		747.775	-0.0132491		747.775	-0.0175282		747.775	-0.0154853		747.775	-0.0138756		747.775	-0.0127349		747.775	-0.0146845		747.775	-0.0161072
	748.257	-0.0156773		748.257	-0.0103551		748.257	-0.0116627		748.257	-0.0176634		748.257	-0.0152036		748.257	-0.0136761		748.257	-0.0169683		748.257	-0.0160267		748.257	-0.0145268		748.257	-0.0129433		748.257	-0.015176		748.257	-0.0165234
	748.74	-0.0168019		748.74	-0.0109621		748.74	-0.0116342		748.74	-0.0174644		748.74	-0.0158532		748.74	-0.0139309		748.74	-0.0158124		748.74	-0.0163419		748.74	-0.0150718		748.74	-0.0129939		748.74	-0.0154905		748.74	-0.0166482
	749.222	-0.0177654		749.222	-0.0118545		749.222	-0.0114081		749.222	-0.016834		749.222	-0.0160971		749.222	-0.0141172		749.222	-0.0142864		749.222	-0.0163771		749.222	-0.015468		749.222	-0.012912		749.222	-0.0156788		749.222	-0.0164914
	749.704	-0.0184801		749.704	-0.0129785		749.704	-0.011107		749.704	-0.0159248		749.704	-0.0159807		749.704	-0.0143464		749.704	-0.0126949		749.704	-0.0161302		749.704	-0.0156993		749.704	-0.01276		749.704	-0.0158119		749.704	-0.0161035
	750.186	-0.0188822		750.186	-0.0141977		750.186	-0.0108903		750.186	-0.0149207		750.186	-0.0156363		750.186	-0.0147006		750.186	-0.0113285		750.186	-0.0156266		750.186	-0.0157737		750.186	-0.0125984		750.186	-0.0159461		750.186	-0.0155395
	750.668	-0.0189425		750.668	-0.0153178		750.668	-0.0108734		750.668	-0.0139761		750.668	-0.0152232		750.668	-0.0152046		750.668	-0.0103756		750.668	-0.0149006		750.668	-0.0157085		750.668	-0.0124563		750.668	-0.0160903		750.668	-0.0148289
	751.15	-0.0186689		751.15	-0.0161483		751.15	-0.0110687		751.15	-0.0131694		751.15	-0.0148632		751.15	-0.0158179		751.15	-0.00987992		751.15	-0.0139879		751.15	-0.0155305		751.15	-0.0123173		751.15	-0.0161971		751.15	-0.0139709
	751.632	-0.0180988		751.632	-0.0165606		751.632	-0.0113944		751.632	-0.0125002		751.632	-0.014601		751.632	-0.0164515		751.632	-0.00974763		751.632	-0.0129466		751.632	-0.0152752		751.632	-0.0121377		751.632	-0.0161824		751.632	-0.0129504
	752.114	-0.0172835		752.114	-0.0165346		752.114	-0.0117157		752.114	-0.0119151		752.114	-0.0144064		752.114	-0.0169944		752.114	-0.00980934		752.114	-0.0118776		752.114	-0.0149978		752.114	-0.0118696		752.114	-0.0159606		752.114	-0.0117707
	752.597	-0.0162783		752.597	-0.0161621		752.597	-0.0119166		752.597	-0.0113548		752.597	-0.0142095		752.597	-0.0173564		752.597	-0.00989223		752.597	-0.0109345		752.597	-0.0147718		752.597	-0.0114962		752.597	-0.015487		752.597	-0.0104786
	753.079	-0.0151346		753.079	-0.0156212		753.079	-0.0119509		753.079	-0.010794		753.079	-0.0139554		753.079	-0.0175027		753.079	-0.00989411		753.079	-0.0102979		753.079	-0.0146797		753.079	-0.0110494		753.079	-0.0147891		753.079	-0.00916957
	753.561	-0.0139024		753.561	-0.015103		753.561	-0.011858		753.561	-0.0102636		753.561	-0.0136404		753.561	-0.0174641		753.561	-0.00981145		753.561	-0.0101236		753.561	-0.0147849		753.561	-0.0106047		753.561	-0.013961		753.561	-0.0079634
	754.043	-0.012639		754.043	-0.0147484		754.043	-0.0117328		754.043	-0.00983539		754.043	-0.0133196		754.043	-0.0173302		754.043	-0.00973198		754.043	-0.0104798		754.043	-0.015104		754.043	-0.0102559		754.043	-0.0131388		754.043	-0.00696629
	754.525	-0.0114203		754.525	-0.0145963		754.525	-0.0116755		754.525	-0.00959108		754.525	-0.013077		754.525	-0.0172112		754.525	-0.00978054		754.525	-0.0113137		754.525	-0.0155891		754.525	-0.0100854		754.525	-0.0124516		754.525	-0.00623904
	755.007	-0.0103418		755.007	-0.014584		755.007	-0.0117428		755.007	-0.00957815		755.007	-0.0129779		755.007	-0.017198		755.007	-0.0100586		755.007	-0.0124505		755.007	-0.0161363		755.007	-0.0101287		755.007	-0.0119814		755.007	-0.0057837
	755.489	-0.00951134		755.489	-0.0145815		755.489	-0.0119366		755.489	-0.00977847		755.489	-0.0130278		755.489	-0.0173272		755.489	-0.0105906		755.489	-0.0136375		755.489	-0.0166114		755.489	-0.0103678		755.489	-0.0117417		755.489	-0.00555352
	755.971	-0.00902074		755.971	-0.0144484		755.971	-0.0122133		755.971	-0.0101052		755.971	-0.013164		755.971	-0.0175657		755.971	-0.0113111		755.971	-0.0146101		755.971	-0.0168939		755.971	-0.0107289		755.971	-0.0116778		755.971	-0.00548652
	756.454	-0.00891925		756.454	-0.0140855		756.454	-0.0125248		756.454	-0.0104232		756.454	-0.0132778		756.454	-0.0178225		756.454	-0.0120792		756.454	-0.0151626		756.454	-0.0169151		756.454	-0.0111089		756.454	-0.0116917		756.454	-0.00553641
	756.936	-0.00918748		756.936	-0.0134611		756.936	-0.0128398		756.936	-0.0105957		756.936	-0.0132646		756.936	-0.017979		756.936	-0.0127276		756.936	-0.0151981		756.936	-0.016683		756.936	-0.0114019		756.936	-0.0116752		756.936	-0.00569544
	757.418	-0.0097426		757.418	-0.0126104		757.418	-0.0131582		757.418	-0.0105356		757.418	-0.0130783		757.418	-0.0179327		757.418	-0.0131199		757.418	-0.0147485		757.418	-0.0162708		757.418	-0.0115351		757.418	-0.011546		757.418	-0.00600123
	757.9	-0.010466		757.9	-0.0116132		757.9	-0.01349		757.9	-0.0102428		757.9	-0.0127588		757.9	-0.017638		757.9	-0.0131994		757.9	-0.0139482		757.9	-0.0157852		757.9	-0.011492		757.9	-0.0112745		757.9	-0.00651781
	758.382	-0.0112429		758.382	-0.010555		758.382	-0.0138269		758.382	-0.00981099		758.382	-0.0124235		758.382	-0.0171221		758.382	-0.0130006		758.382	-0.0129884		758.382	-0.0153187		758.382	-0.0113179		758.382	-0.0108882		758.382	-0.00730713
	758.864	-0.0119882		758.864	-0.00951228		758.864	-0.0141151		758.864	-0.00939706		758.864	-0.0122214		758.864	-0.0164771		758.864	-0.0126344		758.864	-0.0120616		758.864	-0.0149178		758.864	-0.0111064		758.864	-0.0104625		758.864	-0.00839108
	759.346	-0.0126534		759.346	-0.00854624		759.346	-0.0142575		759.346	-0.00916957		759.346	-0.0122712		759.346	-0.0158331		759.346	-0.012243		759.346	-0.0113235		759.346	-0.0145714		759.346	-0.0109745		759.346	-0.0100994		759.346	-0.00972504
	759.828	-0.0132064		759.828	-0.00772025		759.828	-0.0141415		759.828	-0.00925028		759.828	-0.0126075		759.828	-0.0153128		759.828	-0.0119591		759.828	-0.0108715		759.828	-0.0142344		759.828	-0.0110236		759.828	-0.00989922		759.828	-0.0111909
	760.311	-0.0136051		760.311	-0.00710449		760.311	-0.0136884		760.311	-0.00966218		760.311	-0.0131524		760.311	-0.0149965		760.311	-0.0118523		760.311	-0.0107391		760.311	-0.0138551		760.311	-0.0113083		760.311	-0.00993511		760.311	-0.01261
	760.793	-0.0137788		760.793	-0.00677498		760.793	-0.0128943		760.793	-0.0103089		760.793	-0.0137271		760.793	-0.0148864		760.793	-0.0119076		760.793	-0.0108901		760.793	-0.0134079		760.793	-0.011809		760.793	-0.0102296		760.793	-0.0137828
	761.275	-0.0136293		761.275	-0.00678809		761.275	-0.011852		761.275	-0.0109983		761.275	-0.0140986		761.275	-0.0149101		761.275	-0.0120205		761.275	-0.0112289		761.275	-0.0129028		761.275	-0.0124283		761.275	-0.0107423		761.275	-0.0145409
	761.757	-0.0130659		761.757	-0.0071556		761.757	-0.0107285		761.757	-0.0114998		761.757	-0.0140515		761.757	-0.0149425		761.757	-0.0120263		761.757	-0.0116122		761.757	-0.012372		761.757	-0.013012		761.757	-0.0113787		761.757	-0.0147989
	762.239	-0.0120482		762.239	-0.00782356		762.239	-0.00971973		762.239	-0.0116246		762.239	-0.0134537		762.239	-0.014857		762.239	-0.0117529		762.239	-0.011886		762.239	-0.0118428		762.239	-0.0133979		762.239	-0.0120119		762.239	-0.0145851
	762.721	-0.0106289		762.721	-0.00867705		762.721	-0.00899442		762.721	-0.0112885		762.721	-0.0123017		762.721	-0.014574		762.721	-0.011075		762.721	-0.0119216		762.721	-0.0113196		762.721	-0.0134599		762.721	-0.0125152		762.721	-0.0140461
	763.203	-0.00897206		763.203	-0.00956392		763.203	-0.0086524		763.203	-0.0105472		763.203	-0.0107304		763.203	-0.0140937		763.203	-0.00995661		763.203	-0.0116597		763.203	-0.0107723		763.203	-0.0131538		763.203	-0.0127895		763.203	-0.0134145
	763.685	-0.00733948		763.685	-0.0103406		763.685	-0.00870836		763.685	-0.00959137		763.685	-0.00900107		763.685	-0.0135031		763.685	-0.00848396		763.685	-0.0111429		763.685	-0.0101632		763.685	-0.0125309		763.685	-0.0127911		763.685	-0.0129638
	764.168	-0.00603764		764.168	-0.01091		764.168	-0.00910222		764.168	-0.00869882		764.168	-0.00744743		764.168	-0.0129485		764.168	-0.00685182		764.168	-0.0105232		764.168	-0.00947834		764.168	-0.0117355		764.168	-0.0125381		764.168	-0.0129328
	764.65	-0.00533701		764.65	-0.0112498		764.65	-0.00972397		764.65	-0.00815592		764.65	-0.00640356		764.65	-0.0125852		764.65	-0.00532588		764.65	-0.0100283		764.65	-0.00876513		764.65	-0.0109628		764.65	-0.0121087		764.65	-0.0134608
	765.132	-0.00539719		765.132	-0.0114088		765.132	-0.0104497		765.132	-0.00817273		765.132	-0.00611553		765.132	-0.0125159		765.132	-0.00417224		765.132	-0.00989774		765.132	-0.00814135		765.132	-0.0104031		765.132	-0.0116177		765.132	-0.0145355
	765.614	-0.00622467		765.614	-0.0114818		765.614	-0.0111693		765.614	-0.00882276		765.614	-0.00668102		765.614	-0.0127525		765.614	-0.00359037		765.614	-0.0103013		765.614	-0.00778053		765.614	-0.010187		765.614	-0.0111906		765.614	-0.0159958
	766.096	-0.00767647		766.096	-0.0115548		766.096	-0.0118015		766.096	-0.0100248		766.096	-0.00801974		766.096	-0.0132026		766.096	-0.00365894		766.096	-0.0112815		766.096	-0.00785763		766.096	-0.0103491		766.096	-0.0109279		766.096	-0.0175684
	766.578	-0.0095022		766.578	-0.0116741		766.578	-0.012296		766.578	-0.0115737		766.578	-0.0098988		766.578	-0.0137031		766.578	-0.00432977		766.578	-0.0127315		766.578	-0.0084954		766.578	-0.0108251		766.578	-0.010888		766.578	-0.0189418
	767.06	-0.0114079		767.06	-0.011824		767.06	-0.0126349		767.06	-0.0131974		767.06	-0.0119869		767.06	-0.0140717		767.06	-0.00544726		767.06	-0.0144249		767.06	-0.00970606		767.06	-0.0114808		767.06	-0.0110754		767.06	-0.019841
	767.542	-0.0131087		767.542	-0.011941		767.542	-0.0128237		767.542	-0.0146206		767.542	-0.0139306		767.542	-0.0141666		767.542	-0.00680153		767.542	-0.0160753		767.542	-0.011365		767.542	-0.0121464		767.542	-0.0114397		767.542	-0.0200944
	768.024	-0.0143824		768.024	-0.0119513		768.024	-0.012893		768.024	-0.015625		768.024	-0.0154376		768.024	-0.0139348		768.024	-0.0081831		768.024	-0.0174167		768.024	-0.0132228		768.024	-0.0126705		768.024	-0.0118892		768.024	-0.0196778
	768.507	-0.0150928		768.507	-0.0118098		768.507	-0.012881		768.507	-0.0160835		768.507	-0.0163355		768.507	-0.0134252		768.507	-0.00943143		768.507	-0.0182617		768.507	-0.0149556		768.507	-0.0129477		768.507	-0.0123094		768.507	-0.0187087
	768.989	-0.0152072		768.989	-0.011526		768.989	-0.0128248		768.989	-0.0159741		768.989	-0.0166043		768.989	-0.0127672		768.989	-0.0104633		768.989	-0.0185353		768.989	-0.0162454		768.989	-0.0129403		768.989	-0.0125899		768.989	-0.0174039
	769.471	-0.0147752		769.471	-0.0111605		769.471	-0.0127317		769.471	-0.015353		769.471	-0.0163467		769.471	-0.0121107		769.471	-0.0112662		769.471	-0.018252		769.471	-0.0168529		769.471	-0.0126661		769.471	-0.0126526		769.471	-0.0159945
	769.953	-0.0139056		769.953	-0.0107937		769.953	-0.012575		769.953	-0.0143249		769.953	-0.0157333		769.953	-0.0115696		769.953	-0.0118706		769.953	-0.0174782		769.953	-0.0166603		769.953	-0.0121808		769.953	-0.0124726		769.953	-0.0146522
	770.435	-0.0127281		770.435	-0.0104805		770.435	-0.0122927		770.435	-0.0130026		770.435	-0.0149285		770.435	-0.0111771		770.435	-0.0123096		770.435	-0.016279		770.435	-0.0156848		770.435	-0.0115478		770.435	-0.0120873		770.435	-0.0134408
	770.917	-0.0113715		770.917	-0.0102182		770.917	-0.0118141		770.917	-0.0114922		770.917	-0.0140426		770.917	-0.0108846		770.917	-0.0125915		770.917	-0.0147066		770.917	-0.0140591		770.917	-0.0108287		770.917	-0.0115914		770.917	-0.0123202
	771.399	-0.0099526		771.399	-0.00994424		771.399	-0.0110937		771.399	-0.0098899		771.399	-0.0131184		771.399	-0.0105942		771.399	-0.0126984		771.399	-0.0128148		771.399	-0.0120083		771.399	-0.0100759		771.399	-0.0111179		771.399	-0.0111996
	771.881	-0.00857383		771.881	-0.00956104		771.881	-0.0101521		771.881	-0.00829159		771.881	-0.0121517		771.881	-0.0102141		771.881	-0.0126033		771.881	-0.0106978		771.881	-0.00981465		771.881	-0.00934239		771.881	-0.0108019		771.881	-0.0100058
	772.364	-0.00732016		772.364	-0.00898092		772.364	-0.00908603		772.364	-0.00679393		772.364	-0.0111349		772.364	-0.00971264		772.364	-0.0123018		772.364	-0.00851869		772.364	-0.00777809		772.364	-0.00868453		772.364	-0.0107418		772.364	-0.00874626
	772.846	-0.00626295		772.846	-0.00817468		772.846	-0.00805516		772.846	-0.00549225		772.846	-0.0100904		772.846	-0.00914424		772.846	-0.0118328		772.846	-0.00650632		772.846	-0.00616401		772.846	-0.00816287		772.846	-0.0109589		772.846	-0.00753413
	773.328	-0.00545698		773.328	-0.00719803		773.328	-0.00723424		773.328	-0.00446406		773.328	-0.00908775		773.328	-0.00864009		773.328	-0.0112883		773.328	-0.0049083		773.328	-0.00516076		773.328	-0.00783046		773.328	-0.0113902		773.328	-0.00656341
	773.81	-0.00493621		773.81	-0.00617531		773.81	-0.00675566		773.81	-0.00375747		773.81	-0.00822738		773.81	-0.0083593		773.81	-0.0107882		773.81	-0.00393163		773.81	-0.00484569		773.81	-0.00772279		773.81	-0.0119005		773.81	-0.0060443
	774.292	-0.00470579		774.292	-0.00526542		774.292	-0.00666226		774.292	-0.00337984		774.292	-0.00760521		774.292	-0.00842615		774.292	-0.010449		774.292	-0.00367852		774.292	-0.00518096		774.292	-0.0078395		774.292	-0.0123254		774.292	-0.00612468
	774.774	-0.00473981		774.774	-0.00460833		774.774	-0.00689556		774.774	-0.00329902		774.774	-0.00727663		774.774	-0.00887899		774.774	-0.0103456		774.774	-0.00411931		774.774	-0.00601577		774.774	-0.00814427		774.774	-0.0125215		774.774	-0.00682619
	775.256	-0.00497962		775.256	-0.0042864		775.256	-0.00731498		775.256	-0.00345072		775.256	-0.00723235		775.256	-0.00964112		775.256	-0.0104884		775.256	-0.00510074		775.256	-0.00711717		775.256	-0.00855901		775.256	-0.0124112		775.256	-0.0080202
	775.739	-0.00534751		775.739	-0.00430431		775.739	-0.00775271		775.739	-0.00375855		775.739	-0.00740079		775.739	-0.0105403		775.739	-0.0108172		775.739	-0.00639876		775.739	-0.0082109		775.739	-0.00898793		775.739	-0.0120142		775.739	-0.00945387
	776.221	-0.00577235		776.221	-0.00460754		776.221	-0.00807725		776.221	-0.00415767		776.221	-0.00768132		776.221	-0.0113653		776.221	-0.0112228		776.221	-0.00778769		776.221	-0.00904975		776.221	-0.00933847		776.221	-0.0114501		776.221	-0.0108267
	776.703	-0.00622258		776.703	-0.00511675		776.703	-0.00825014		776.703	-0.00462066		776.703	-0.00798608		776.703	-0.0119446		776.703	-0.0115856		776.703	-0.00911432		776.703	-0.00947429		776.703	-0.00955847		776.703	-0.0109061		776.703	-0.0118908
	777.185	-0.00672957		777.185	-0.00577869		777.185	-0.00834042		777.185	-0.00517186		777.185	-0.00828392		777.185	-0.0122172		777.185	-0.0118192		777.185	-0.0103275		777.185	-0.00946353		777.185	-0.00965771		777.185	-0.0105864		777.185	-0.0125323
	777.667	-0.00738196		777.667	-0.00658475		777.667	-0.0084955		777.667	-0.00588099		777.667	-0.0086082		777.667	-0.0122558		777.667	-0.0118951		777.667	-0.0114624		777.667	-0.00913285		777.667	-0.0097126		777.667	-0.0106471		777.667	-0.0127978
	778.149	-0.00829354		778.149	-0.00756281		778.149	-0.00887487		778.149	-0.00683584		778.149	-0.0090383		778.149	-0.0122456		778.149	-0.0118493		778.149	-0.0125817		778.149	-0.00870304		778.149	-0.00984407		778.149	-0.0111556		778.149	-0.0128626
	778.631	-0.00954412		778.631	-0.0087323		778.631	-0.00957598		778.631	-0.00809621		778.631	-0.0096477		778.631	-0.0124113		778.631	-0.0117517		778.631	-0.0137002		778.631	-0.00841929		778.631	-0.0101783		778.631	-0.0120689		778.631	-0.0129435
	779.113	-0.0111215		779.113	-0.0100533		779.113	-0.0105731		779.113	-0.00964679		779.113	-0.0104564		779.113	-0.0129302		779.113	-0.0116776		779.113	-0.0147336		779.113	-0.00847301		779.113	-0.0107923		779.113	-0.0132399		779.113	-0.013207
	779.596	-0.0128895		779.596	-0.0113937		779.596	-0.0117108		779.596	-0.0113686		779.596	-0.0113937		779.596	-0.0138562		779.596	-0.0116677		779.596	-0.0154965		779.596	-0.00892814		779.596	-0.0116739		779.596	-0.0144449		779.596	-0.0136971
	780.078	-0.014601		780.078	-0.0125409		780.078	-0.0127375		780.078	-0.0130444		780.078	-0.0123074		780.078	-0.0150818		780.078	-0.0117092		780.078	-0.0157509		780.078	-0.0096917		780.078	-0.012702		780.078	-0.0154319		780.078	-0.0143141
	780.56	-0.0159608		780.56	-0.0132576		780.56	-0.0133952		780.56	-0.0144057		780.56	-0.0130031		780.56	-0.0163629		780.56	-0.0117346		780.56	-0.0152958		780.56	-0.0105363		780.56	-0.0136696		780.56	-0.0159719		780.56	-0.0148561
	781.042	-0.0167176		781.042	-0.0133684		781.042	-0.013514		781.042	-0.0152116		781.042	-0.0133126		781.042	-0.0173996		781.042	-0.0116551		781.042	-0.0140535		781.042	-0.0111845		781.042	-0.0143434		781.042	-0.0159162		781.042	-0.0151086
	781.524	-0.0167382		781.524	-0.012821		781.524	-0.0130801		781.524	-0.0153245		781.524	-0.0131533		781.524	-0.0179306		781.524	-0.0113922		781.524	-0.0121223		781.524	-0.0114003		781.524	-0.0145379		781.524	-0.0152232		781.524	-0.0149374
	782.006	-0.0160429		782.006	-0.0117166		782.006	-0.0122475		782.006	-0.0147545		782.006	-0.0125563		782.006	-0.0178178		782.006	-0.0109175		782.006	-0.00977011		782.006	-0.0110793		782.006	-0.0141791		782.006	-0.0139728		782.006	-0.0143467
	782.488	-0.0147963		782.488	-0.0102832		782.488	-0.0112986		782.488	-0.0136685		782.488	-0.0116624		782.488	-0.0170839		782.488	-0.0102696		782.488	-0.00738323		782.488	-0.0102811		782.488	-0.0133405		782.488	-0.0123562		782.488	-0.0134863
	782.97	-0.0132568		782.97	-0.00881065		782.97	-0.0105509		782.97	-0.012347		782.97	-0.0106789		782.97	-0.0158999		782.97	-0.00955429		782.97	-0.00537373		782.97	-0.00921567		782.97	-0.0122278		782.97	-0.0106439		782.97	-0.0126055
	783.452	-0.0117142		783.452	-0.0075646		783.452	-0.010257		783.452	-0.0111112		783.452	-0.00982188		783.452	-0.014531		783.452	-0.00891275		783.452	-0.00407808		783.452	-0.00817634		783.452	-0.0111331		783.452	-0.00913629		783.452	-0.0119723
	783.935	-0.0104266		783.935	-0.006717		783.935	-0.010516		783.935	-0.010233		783.935	-0.00925761		783.935	-0.0132569		783.935	-0.00848705		783.935	-0.00367537		783.935	-0.00745013		783.935	-0.0103479		783.935	-0.00810405		783.935	-0.0117911
	784.417	-0.00958379		784.417	-0.00631167		784.417	-0.0112488		784.417	-0.00986515		784.417	-0.00906101		784.417	-0.0122929		784.417	-0.00837363		784.417	-0.00415495		784.417	-0.00722765		784.417	-0.010081		784.417	-0.00772449		784.417	-0.0121428
	784.899	-0.00929595		784.899	-0.0062912		784.899	-0.0122348		784.899	-0.0100108		784.899	-0.00921071		784.899	-0.0117415		784.899	-0.00860238		784.899	-0.005341		784.899	-0.00755744		784.899	-0.0103949		784.899	-0.00804798		784.899	-0.0129761
	785.381	-0.00960443		785.381	-0.00655039		785.381	-0.0132052		785.381	-0.0105509		785.381	-0.0096136		785.381	-0.0115872		785.381	-0.00913019		785.381	-0.00696867		785.381	-0.00834744		785.381	-0.0111975		785.381	-0.00899263		785.381	-0.0141399
	785.863	-0.010494		785.863	-0.0070047		785.863	-0.0139419		785.863	-0.0113083		785.863	-0.0101471		785.863	-0.0117388		785.863	-0.00986224		785.863	-0.0087585		785.863	-0.00942601		785.863	-0.0122799		785.863	-0.0103804		785.863	-0.0154374
	786.345	-0.0118918		786.345	-0.00762409		786.345	-0.0143549		786.345	-0.0121142		786.345	-0.0106976		786.345	-0.0120792		786.345	-0.0106758		786.345	-0.0104769		786.345	-0.0106053		786.345	-0.0133834		786.345	-0.0119849		786.345	-0.0166708
	786.827	-0.0136523		786.827	-0.00842898		786.827	-0.0145027		786.827	-0.0128569		786.827	-0.0111872		786.827	-0.0125164		786.827	-0.0114547		786.827	-0.0119615		786.827	-0.0117436		786.827	-0.0142679		786.827	-0.0135855		786.827	-0.0176755
	787.309	-0.0155469		787.309	-0.009448		787.309	-0.0145604		787.309	-0.0134923		787.309	-0.0115784		787.309	-0.0129997		787.309	-0.0121092		787.309	-0.0131213		787.309	-0.0127694		787.309	-0.014774		787.309	-0.0150064		787.309	-0.0183292
	787.792	-0.0172821		787.792	-0.0106642		787.792	-0.0147341		787.792	-0.014023		787.792	-0.011864		787.792	-0.0135162		787.792	-0.0125911		787.792	-0.0139195		787.792	-0.0136769		787.792	-0.0148478		787.792	-0.0161455		787.792	-0.0185562
	788.274	-0.0185536		788.274	-0.011984		788.274	-0.015165		788.274	-0.0144586		788.274	-0.0120488		788.274	-0.0140573		788.274	-0.0128972		788.274	-0.0143586		788.274	-0.0144853		788.274	-0.0145437		788.274	-0.0169732		788.274	-0.0183303
	788.756	-0.0191194		788.756	-0.0132469		788.756	-0.0158555		788.756	-0.0147766		788.756	-0.0121301		788.756	-0.0145892		788.756	-0.0130602		788.756	-0.0144621		788.756	-0.0151983		788.756	-0.0139868		788.756	-0.0175151		788.756	-0.017677
	789.238	-0.0188669		789.238	-0.0142678		789.238	-0.0166628		789.238	-0.014915		789.238	-0.0120914		789.238	-0.0150323		789.238	-0.0131334		789.238	-0.014275		789.238	-0.0157712		789.238	-0.0133333		789.238	-0.0178184		789.238	-0.0166747
	789.72	-0.0178414		789.72	-0.014901		789.72	-0.0173443		789.72	-0.0147865		789.72	-0.011906		789.72	-0.0152719		789.72	-0.0131752		789.72	-0.0138651		789.72	-0.0161209		789.72	-0.012724		789.72	-0.0179279		789.72	-0.0154521
	790.202	-0.0162365		790.202	-0.0150863		790.202	-0.0176514		790.202	-0.0143184		790.202	-0.0115533		790.202	-0.0151916		790.202	-0.0132309		790.202	-0.0133242		790.202	-0.0161499		790.202	-0.0122629		790.202	-0.0178692		790.202	-0.0141694
	790.684	-0.0143488		790.684	-0.0148731		790.684	-0.0174173		790.684	-0.013498		790.684	-0.0110389		790.684	-0.0147155		790.684	-0.013329		790.684	-0.0127703		790.684	-0.015805		790.684	-0.0119996		790.684	-0.0176567		790.684	-0.0129954
	791.167	-0.0125045		791.167	-0.0143971		791.167	-0.0166185		791.167	-0.0123935		791.167	-0.0104076		791.167	-0.0138516		791.167	-0.0134675		791.167	-0.0123263		791.167	-0.0151154		791.167	-0.0119291		791.167	-0.0173064		791.167	-0.0120614
	791.649	-0.0109861		791.649	-0.0138387		791.649	-0.0153866		791.649	-0.0111545		791.649	-0.00974753		791.649	-0.0127078		791.649	-0.0136226		791.649	-0.0120965		791.649	-0.0142172		791.649	-0.0119949		791.649	-0.0168559		791.649	-0.0114288
	792.131	-0.00997264		792.131	-0.0133513		792.131	-0.0139615		792.131	-0.00997128		792.131	-0.00916756		792.131	-0.0114731		792.131	-0.0137492		792.131	-0.0121337		792.131	-0.0133245		792.131	-0.0120998		792.131	-0.0163667		792.131	-0.0110703
	792.613	-0.00952282		792.613	-0.0130156		792.613	-0.0126012		792.613	-0.00901814		792.613	-0.00876639		792.613	-0.0103634		792.613	-0.0137923		792.613	-0.0124188		792.613	-0.0126662		792.613	-0.0121223		792.613	-0.0159134		792.613	-0.0108823
	793.095	-0.00960349		793.095	-0.0128217		793.095	-0.011505		793.095	-0.00841634		793.095	-0.00860326		793.095	-0.00956473		793.095	-0.0137066		793.095	-0.0128696		793.095	-0.0124145		793.095	-0.0119475		793.095	-0.0155669		793.095	-0.0107351
	793.577	-0.0101238		793.577	-0.0126928		793.577	-0.0107553		793.577	-0.00821057		793.577	-0.00867397		793.577	-0.00918038		793.577	-0.0134664		793.577	-0.0133577		793.577	-0.012627		793.577	-0.0114903		793.577	-0.0153668		793.577	-0.0105173
	794.059	-0.0109694		794.059	-0.0125287		794.059	-0.0103208		794.059	-0.00837851		794.059	-0.00890763		794.059	-0.00921081		794.059	-0.0130767		794.059	-0.0137454		794.059	-0.0132215		794.059	-0.0107258		794.059	-0.0153041		794.059	-0.0101723
	794.541	-0.0120095		794.541	-0.0122501		794.541	-0.0100843		794.541	-0.00885387		794.541	-0.0091818		794.541	-0.00956023		794.541	-0.012581		794.541	-0.0139151		794.541	-0.0139925		794.541	-0.00969922		794.541	-0.0153191		794.541	-0.00970849
	795.024	-0.0130934		795.024	-0.0118274		795.024	-0.00990489		795.024	-0.00954781		795.024	-0.00935598		795.024	-0.01007		795.024	-0.0120533		795.024	-0.0137988		795.024	-0.0146643		795.024	-0.00852737		795.024	-0.0153084		795.024	-0.00917983
	795.506	-0.0140525		795.506	-0.0112801		795.506	-0.00966222		795.506	-0.0103642		795.506	-0.00931606		795.506	-0.0105676		795.506	-0.0115868		795.506	-0.0133909		795.506	-0.0149635		795.506	-0.00736991		795.506	-0.0151528		795.506	-0.00865542
	795.988	-0.0147247		795.988	-0.0106595		795.988	-0.00929802		795.988	-0.0112091		795.988	-0.00901678		795.988	-0.0109158		795.988	-0.0112706		795.988	-0.0127486		795.988	-0.0146917		795.988	-0.00638906		795.988	-0.0147537		795.988	-0.00819116
	796.47	-0.0149938		796.47	-0.0100208		796.47	-0.00882289		796.47	-0.0119917		796.47	-0.00850372		796.47	-0.0110496		796.47	-0.0111706		796.47	-0.0119707		796.47	-0.0137772		796.47	-0.00570597		796.47	-0.0140664		796.47	-0.00781718
	796.952	-0.0148324		796.952	-0.00939813		796.952	-0.00830573		796.952	-0.0126308		796.952	-0.00790591		796.952	-0.0109824		796.952	-0.0113135		796.952	-0.0111741		796.952	-0.0122842		796.952	-0.0053751		796.952	-0.0131174		796.952	-0.00755083
	797.434	-0.0143191		797.434	-0.00880857		797.434	-0.00784923		797.434	-0.0130606		797.434	-0.00740509		797.434	-0.0107914		797.434	-0.0116833		797.434	-0.0104644		797.434	-0.0103974		797.434	-0.00538682		797.434	-0.0120041		797.434	-0.00741812
	797.916	-0.0136258		797.916	-0.00826142		797.916	-0.00756467		797.916	-0.0132421		797.916	-0.00718085		797.916	-0.0105843		797.916	-0.0122197		797.916	-0.0099148		797.916	-0.00837542		797.916	-0.00568995		797.916	-0.0108716		797.916	-0.00746554
	798.398	-0.0129643		798.398	-0.00778174		798.398	-0.00754246		798.398	-0.0131733		798.398	-0.00736104		798.398	-0.0104632		798.398	-0.0128328		798.398	-0.00955235		798.398	-0.00650224		798.398	-0.0062148		798.398	-0.00987461		798.398	-0.00775489
	798.88	-0.0125166		798.88	-0.00741789		798.88	-0.00783381		798.88	-0.0128934		798.88	-0.00797749		798.88	-0.0104911		798.88	-0.0134088		798.88	-0.00935228		798.88	-0.00503212		798.88	-0.00689713		798.88	-0.00913424		798.88	-0.00833154
	799.363	-0.0123671		799.363	-0.00724141		799.363	-0.00842491		799.363	-0.0124734		799.363	-0.00895989		799.363	-0.0106777		799.363	-0.0138377		799.363	-0.00924834		799.363	-0.0041433		799.363	-0.00767807		799.363	-0.00870421		799.363	-0.00919092
	799.845	-0.0124703		799.845	-0.00732097		799.845	-0.0092365		799.845	-0.0119953		799.845	-0.0101531		799.845	-0.0109749		799.845	-0.0140303		799.845	-0.00915154		799.845	-0.00390608		799.845	-0.0085004		799.845	-0.00855437		799.845	-0.0102592
	800.327	-0.0126721		800.327	-0.00770258		800.327	-0.0101306		800.327	-0.0115273		800.327	-0.0113709		800.327	-0.0112974		800.327	-0.0139461		800.327	-0.00898322		800.327	-0.0042844		800.327	-0.00929695		800.327	-0.00859549		800.327	-0.0114078
	800.809	-0.0127779		800.809	-0.00838644		800.809	-0.01095		800.809	-0.0111127		800.809	-0.0124488		800.809	-0.0115478		800.809	-0.0136063		800.809	-0.00871213		800.809	-0.0051584		800.809	-0.00999343		800.809	-0.00872181		800.809	-0.0124993
	801.291	-0.0126224		801.291	-0.00932371		801.291	-0.01155		801.291	-0.0107648		801.291	-0.0132761		801.291	-0.0116436		801.291	-0.0130928		801.291	-0.00836814		801.291	-0.00636519		801.291	-0.0105123		801.291	-0.00885555		801.291	-0.0134332
	801.773	-0.0121323		801.773	-0.0104221		801.773	-0.0118426		801.773	-0.0104863		801.773	-0.0138052		801.773	-0.0115391		801.773	-0.0125328		801.773	-0.00805077		801.773	-0.00772745		801.773	-0.0108003		801.773	-0.00897988		801.773	-0.0141792
	802.255	-0.0113403		802.255	-0.0115603		802.255	-0.0118166		802.255	-0.0102829		802.255	-0.0140368		802.255	-0.0112337		802.255	-0.0120692		802.255	-0.00790032		802.255	-0.0090762		802.255	-0.0108455		802.255	-0.00913307		802.255	-0.0147761
	802.737	-0.0103665		802.737	-0.0126034		802.737	-0.0115415		802.737	-0.0101711		802.737	-0.0139911		802.737	-0.0107741		802.737	-0.0118176		802.737	-0.00805029		802.737	-0.0102588		802.737	-0.010694		802.737	-0.0093754		802.737	-0.0152927
	803.22	-0.00936866		803.22	-0.0134251		803.22	-0.0111414		803.22	-0.0101751		803.22	-0.0136892		803.22	-0.0102438		803.22	-0.0118294		803.22	-0.00857301		803.22	-0.0111481		803.22	-0.0104425		803.22	-0.00974034		803.22	-0.0157728
	803.702	-0.00848559		803.702	-0.0139201		803.702	-0.0107471		803.702	-0.0103053		803.702	-0.0131425		803.702	-0.00974196		803.702	-0.0120695		803.702	-0.00943921		803.702	-0.0116472		803.702	-0.0102071		803.702	-0.0101927		803.702	-0.0161858
	804.184	-0.00780296		804.184	-0.014023		804.184	-0.0104474		804.184	-0.0105435		804.184	-0.0123639		804.184	-0.00936279		804.184	-0.0124368		804.184	-0.0105138		804.184	-0.0117037		804.184	-0.0100814		804.184	-0.0106222		804.184	-0.0164149
	804.666	-0.00735029		804.666	-0.0137117		804.666	-0.0102654		804.666	-0.0108358		804.666	-0.0113887		804.666	-0.00917223		804.666	-0.0128028		804.666	-0.0115966		804.666	-0.0113188		804.666	-0.0101061		804.666	-0.0108766		804.666	-0.0162919
	805.148	-0.00712313		805.148	-0.013019		805.148	-0.0101648		805.148	-0.0111043		805.148	-0.0102963		805.148	-0.00919939		805.148	-0.0130724		805.148	-0.0124829		805.148	-0.0105615		805.148	-0.0102574		805.148	-0.0108271		805.148	-0.0156695
	805.63	-0.00711146		805.63	-0.0120306		805.63	-0.0100861		805.63	-0.011271		805.63	-0.00921603		805.63	-0.00943496		805.63	-0.0132176		805.63	-0.0130262		805.63	-0.00956829		805.63	-0.0104692		805.63	-0.0104333		805.63	-0.0144908
	806.112	-0.00731325		806.112	-0.0108876		806.112	-0.00998747		806.112	-0.0112856		806.112	-0.0083097		806.112	-0.00983166		806.112	-0.0132968		806.112	-0.0131757		806.112	-0.0085364		806.112	-0.0106621		806.112	-0.00978265		806.112	-0.0128445
	806.595	-0.00772898		806.595	-0.00976509		806.595	-0.00987791		806.595	-0.0111459		806.595	-0.00773181		806.595	-0.0103203		806.595	-0.0134224		806.595	-0.0129886		806.595	-0.0076892		806.595	-0.0107864		806.595	-0.00908528		806.595	-0.0109616
	807.077	-0.00834194		807.077	-0.00884377		807.077	-0.00981313		807.077	-0.0108953		807.077	-0.00758394		807.077	-0.0108226		807.077	-0.0137103		807.077	-0.0125968		807.077	-0.00722736		807.077	-0.0108374		807.077	-0.00861398		807.077	-0.00915971
	807.559	-0.0091054		807.559	-0.0082622		807.559	-0.00987144		807.559	-0.0106093		807.559	-0.00787816		807.559	-0.0112734		807.559	-0.0142183		807.559	-0.0121571		807.559	-0.00726998		807.559	-0.0108534		807.559	-0.00860706		807.559	-0.00774594
	808.041	-0.00994275		808.041	-0.00808525		808.041	-0.0101049		808.041	-0.0103607		808.041	-0.00853802		808.041	-0.0116334		808.041	-0.0149076		808.041	-0.0117867		808.041	-0.00781734		808.041	-0.0108859		808.041	-0.00917765		808.041	-0.00691924
	808.523	-0.0107682		808.523	-0.00828415		808.523	-0.0105128		808.523	-0.0102004		808.523	-0.00943198		808.523	-0.0119013		808.523	-0.0156451		808.523	-0.0115374		808.523	-0.00874922		808.523	-0.0109702		808.523	-0.0102629		808.523	-0.00672288
	809.005	-0.0115064		809.005	-0.00875399		809.005	-0.0110291		809.005	-0.0101429		809.005	-0.0104194		809.005	-0.0121073		809.005	-0.0162471		809.005	-0.0113882		809.005	-0.00986282		809.005	-0.0110968		809.005	-0.0116369		809.005	-0.00704963
	809.487	-0.0121066		809.487	-0.00934323		809.487	-0.0115488		809.487	-0.0101705		809.487	-0.0113893		809.487	-0.0123008		809.487	-0.0165365		809.487	-0.0112778		809.487	-0.0109236		809.487	-0.0112136		809.487	-0.0129713		809.487	-0.0076962
	809.969	-0.0125416		809.969	-0.00989625		809.969	-0.011963		809.969	-0.010248		809.969	-0.0122732		809.969	-0.012524		809.969	-0.0164096		809.969	-0.0111462		809.969	-0.0117312		809.969	-0.0112417		809.969	-0.0139287		809.969	-0.00843801
	810.452	-0.012793		810.452	-0.0102955		810.452	-0.0122068		810.452	-0.0103352		810.452	-0.0130389		810.452	-0.0127919		810.452	-0.0158714		810.452	-0.010972		810.452	-0.0121678		810.452	-0.0111135		810.452	-0.0142566		810.452	-0.0090897
	810.934	-0.012833		810.934	-0.0104854		810.934	-0.0122792		810.934	-0.0103945		810.934	-0.0136617		810.934	-0.0130726		810.934	-0.0150353		810.934	-0.0107866		810.934	-0.0122235		810.934	-0.0108035		810.934	-0.0138559		810.934	-0.00954321
	811.416	-0.0126189		811.416	-0.0104793		811.416	-0.0122401		811.416	-0.0103915		811.416	-0.0140987		811.416	-0.0132888		811.416	-0.0140769		811.416	-0.0106628		811.416	-0.0119816		811.416	-0.0103496		811.416	-0.0128045		811.416	-0.00976914
	811.898	-0.0120974		811.898	-0.0103412		811.898	-0.0121749		811.898	-0.0102924		811.898	-0.0142771		811.898	-0.0133338		811.898	-0.013167		811.898	-0.0106798		811.898	-0.0115737		811.898	-0.00984141		811.898	-0.0113203		811.898	-0.00979075
	812.38	-0.0112344		812.38	-0.0101505		812.38	-0.0121571		812.38	-0.0100678		812.38	-0.0141145		812.38	-0.0131042		812.38	-0.012412		812.38	-0.0108948		812.38	-0.0111233		812.38	-0.0093982		812.38	-0.00969199		812.38	-0.00965233
	812.862	-0.0100432		812.862	-0.00997339		812.862	-0.0122169		812.862	-0.00970282		812.862	-0.0135513		812.862	-0.0125338		812.862	-0.0118317		812.862	-0.0113211		812.862	-0.0107074		812.862	-0.00913324		812.862	-0.00820475		812.862	-0.00939544
	813.344	-0.00860833		813.344	-0.00984326		813.344	-0.0123433		813.344	-0.00921577		813.344	-0.0125942		813.344	-0.0116209		813.344	-0.0113747		813.344	-0.0119358		813.344	-0.0103438		813.344	-0.00913243		813.344	-0.00708666		813.344	-0.00904969
	813.826	-0.00708597		813.826	-0.00976052		813.826	-0.012501		813.826	-0.00867092		813.826	-0.0113442		813.826	-0.0104423		813.826	-0.0109662		813.826	-0.012695		813.826	-0.0100124		813.826	-0.0094348		813.826	-0.00647623		813.826	-0.00864331
	814.308	-0.00567736		814.308	-0.0097022		814.308	-0.0126603		814.308	-0.0081777		814.308	-0.00999252		814.308	-0.00914664		814.308	-0.0105504		814.308	-0.0135563		814.308	-0.00969037		814.308	-0.0100327		814.308	-0.00641717		814.308	-0.0082094
	814.791	-0.0045782		814.791	-0.00964504		814.791	-0.0128195		814.791	-0.00786612		814.791	-0.00878224		814.791	-0.00793119		814.791	-0.0101253		814.791	-0.0144935		814.791	-0.00939048		814.791	-0.0108745		814.791	-0.00687045		814.791	-0.00779091
	815.273	-0.00392325		815.273	-0.00957792		815.273	-0.013008		815.273	-0.00784347		815.273	-0.00793432		815.273	-0.00699404		815.273	-0.00973483		815.273	-0.0154958		815.273	-0.00917181		815.273	-0.0118709		815.273	-0.007731		815.273	-0.00743027
	815.755	-0.00375001		815.755	-0.00951698		815.755	-0.0132634		815.755	-0.0081486		815.755	-0.00758072		815.755	-0.00649389		815.755	-0.00944686		815.755	-0.0165503		815.755	-0.00912915		815.755	-0.0129055		815.755	-0.00886114		815.755	-0.0071553
	816.237	-0.00400166		816.237	-0.00950233		816.237	-0.0136061		816.237	-0.0087273		816.237	-0.00772364		816.237	-0.00651586		816.237	-0.00931139		816.237	-0.0176256		816.237	-0.00935166		816.237	-0.0138474		816.237	-0.0101183		816.237	-0.00697004
	816.719	-0.00455391		816.719	-0.00958975		816.719	-0.0140104		816.719	-0.00943873		816.719	-0.00824305		816.719	-0.00706221		816.719	-0.00933752		816.719	-0.018649		816.719	-0.00988413		816.719	-0.014557		816.719	-0.0113768		816.719	-0.00685173
	817.201	-0.00526156		817.201	-0.00983211		817.201	-0.0144011		817.201	-0.0100883		817.201	-0.0089372		817.201	-0.00805282		817.201	-0.00947928		817.201	-0.019508		817.201	-0.0106867		817.201	-0.0149084		817.201	-0.0125369		817.201	-0.00675814
	817.683	-0.00599188		817.683	-0.0102635		817.683	-0.0146627		817.683	-0.0104866		817.683	-0.00958602		817.683	-0.00934064		817.683	-0.00965898		817.683	-0.0200677		817.683	-0.0116307		817.683	-0.014805		817.683	-0.0135261		817.683	-0.00664326
	818.165	-0.00665198		818.165	-0.0108797		818.165	-0.0146787		818.165	-0.0105039		818.165	-0.0100088		818.165	-0.0107323		818.165	-0.00979172		818.165	-0.0202082		818.165	-0.0125237		818.165	-0.0142144		818.165	-0.0142934		818.165	-0.00646751
	818.648	-0.00719249		818.648	-0.0116293		818.648	-0.0143624		818.648	-0.0101122		818.648	-0.0101023		818.648	-0.0120159		818.648	-0.00981861		818.648	-0.0198607		818.648	-0.0131617		818.648	-0.0131822		818.648	-0.0148003		818.648	-0.00620674
	819.13	-0.00760556		819.13	-0.0124129		819.13	-0.0136889		819.13	-0.00939353		819.13	-0.00985446		819.13	-0.0130007		819.13	-0.00972326		819.13	-0.0190387		819.13	-0.0133923		819.13	-0.0118367		819.13	-0.0150139		819.13	-0.00585735
	819.612	-0.00791349		819.612	-0.0131074		819.612	-0.0127028		819.612	-0.00851515		819.612	-0.0093311		819.612	-0.0135562		819.612	-0.00953718		819.612	-0.0178381		819.612	-0.0131667		819.612	-0.010365		819.612	-0.0149083		819.612	-0.00543855
	820.094	-0.00815322		820.094	-0.0135832		820.094	-0.0115044		820.094	-0.00767862		820.094	-0.00864142		820.094	-0.0136377		820.094	-0.0093218		820.094	-0.0164122		820.094	-0.0125461		820.094	-0.00897235		820.094	-0.0144653		820.094	-0.00499384
	820.576	-0.00836053		820.576	-0.0137371		820.576	-0.0102272		820.576	-0.00706658		820.576	-0.00790917		820.576	-0.0132949		820.576	-0.00915264		820.576	-0.0149334		820.576	-0.0116849		820.576	-0.00784126		820.576	-0.0136924		820.576	-0.00458833
	821.058	-0.0085582		821.058	-0.0135128		821.058	-0.00901577		821.058	-0.00680323		821.058	-0.00724965		821.058	-0.0126633		821.058	-0.00909933		821.058	-0.0135552		821.058	-0.0107743		821.058	-0.00710439		821.058	-0.0126382		821.058	-0.00430471
	821.54	-0.00874227		821.54	-0.012921		821.54	-0.00800052		821.54	-0.00693081		821.54	-0.00675841		821.54	-0.0119297		821.54	-0.00922021		821.54	-0.012384		821.54	-0.00999272		821.54	-0.00682185		821.54	-0.0114028		821.54	-0.0042278
	822.023	-0.00887912		822.023	-0.0120395		822.023	-0.00728187		822.023	-0.00740183		822.023	-0.00650188		822.023	-0.0112897		822.023	-0.00954849		822.023	-0.0114681		822.023	-0.00945179		822.023	-0.00698272		822.023	-0.0101329		822.023	-0.00441748
	822.505	-0.00891363		822.505	-0.0110082		822.505	-0.00690844		822.505	-0.00809133		822.505	-0.00651213		822.505	-0.0108908		822.505	-0.0100902		822.505	-0.0107978		822.505	-0.00917558		822.505	-0.00750732		822.505	-0.00899273		822.505	-0.00488137
	822.987	-0.00878701		822.987	-0.00999055		822.987	-0.00686565		822.987	-0.00882046		822.987	-0.00677609		822.987	-0.0107876		822.987	-0.0108144		822.987	-0.0103223		822.987	-0.0091017		822.987	-0.00826321		822.987	-0.00811354		822.987	-0.00555486
	823.469	-0.0084693		823.469	-0.00913713		823.469	-0.00707525		823.469	-0.00939291		823.469	-0.00724095		823.469	-0.010926		823.469	-0.0116473		823.469	-0.00996921		823.469	-0.00911546		823.469	-0.00908729		823.469	-0.00755386		823.469	-0.00630726
	823.951	-0.00798624		823.951	-0.00854118		823.951	-0.00741561		823.951	-0.0096381		823.951	-0.007823		823.951	-0.0111688		823.951	-0.0124753		823.951	-0.00967155		823.951	-0.00909531		823.951	-0.00981365		823.951	-0.00727617		823.951	-0.00697529
	824.433	-0.00742929		824.433	-0.00822215		824.433	-0.00775326		824.433	-0.00944955		824.433	-0.00842823		824.433	-0.0113479		824.433	-0.013159		824.433	-0.00937696		824.433	-0.00896008		824.433	-0.0102947		824.433	-0.00716798		824.433	-0.00740929
	824.915	-0.00694219		824.915	-0.00812288		824.915	-0.00797837		824.915	-0.00881004		824.915	-0.00897033		824.915	-0.011325		824.915	-0.013551		824.915	-0.00904978		824.915	-0.00868111		824.915	-0.010426		824.915	-0.00708288		824.915	-0.00751302
	825.397	-0.00668111		825.397	-0.00813397		825.397	-0.00803438		825.397	-0.00780667		825.397	-0.00938993		825.397	-0.0110401		825.397	-0.0135372		825.397	-0.00866371		825.397	-0.00828424		825.397	-0.0101661		825.397	-0.00689882		825.397	-0.00727676
	825.88	-0.00676101		825.88	-0.00812428		825.88	-0.00793077		825.88	-0.00661749		825.88	-0.00966059		825.88	-0.0105269		825.88	-0.0130674		825.88	-0.00819448		825.88	-0.00782294		825.88	-0.0095528		825.88	-0.00656028		825.88	-0.00677618
	826.362	-0.00720843		826.362	-0.00798002		826.362	-0.00773406		826.362	-0.00547409		826.362	-0.00979369		826.362	-0.0098979		826.362	-0.012186		826.362	-0.00761966		826.362	-0.00735424		826.362	-0.00870645		826.362	-0.00610001		826.362	-0.0061513
	826.844	-0.00794538		826.844	-0.00763614		826.844	-0.0075436		826.844	-0.00460105		826.844	-0.00982823		826.844	-0.00929608		826.844	-0.0110351		826.844	-0.00693228		826.844	-0.00690962		826.844	-0.00781083		826.844	-0.00561956		826.844	-0.00556124
	827.326	-0.00881779		827.326	-0.0070997		827.326	-0.00745704		827.326	-0.00416013		827.326	-0.00982638		827.326	-0.0088487		827.326	-0.00983296		827.326	-0.00616182		827.326	-0.00649653		827.326	-0.007076		827.326	-0.00525416		827.326	-0.00514606
	827.808	-0.00965411		827.808	-0.00644032		827.808	-0.00754171		827.808	-0.00421448		827.808	-0.00986143		827.808	-0.008626		827.808	-0.00882309		827.808	-0.00539192		827.808	-0.00610292		827.808	-0.0066879		827.808	-0.00511845		827.808	-0.00499705
	828.29	-0.0103199		828.29	-0.00578098		828.29	-0.00782411		828.29	-0.00473289		828.29	-0.010014		828.29	-0.00863824		828.29	-0.00822735		828.29	-0.00476406		828.29	-0.00572651		828.29	-0.00676366		828.29	-0.00527891		828.29	-0.00515476
	828.772	-0.01076		828.772	-0.00526601		828.772	-0.00830066		828.772	-0.00561986		828.772	-0.0103622		828.772	-0.00885377		828.772	-0.00819458		828.772	-0.00445802		828.772	-0.00538718		828.772	-0.00732817		828.772	-0.00573792		828.772	-0.00561718
	829.254	-0.0109934		829.254	-0.00503016		829.254	-0.00894567		829.254	-0.00675638		829.254	-0.0109697		829.254	-0.00922401		829.254	-0.00877367		829.254	-0.00464403		829.254	-0.00513145		829.254	-0.00830206		829.254	-0.00644185		829.254	-0.00635321
	829.736	-0.0110831		829.736	-0.00515794		829.736	-0.00972119		829.736	-0.00802827		829.736	-0.0118591		829.736	-0.00970003		829.736	-0.00989061		829.736	-0.00541663		829.736	-0.00501411		829.736	-0.0095212		829.736	-0.00729608		829.736	-0.00730002
	830.219	-0.0110912		830.219	-0.00565973		830.219	-0.0105759		830.219	-0.00934362		830.219	-0.0129934		830.219	-0.0102383		830.219	-0.0113646		830.219	-0.00674164		830.219	-0.00507329		830.219	-0.010772		830.219	-0.00818798		830.219	-0.00836505
	830.701	-0.0110386		830.701	-0.00645527		830.701	-0.0114374		830.701	-0.0106285		830.701	-0.0142626		830.701	-0.0107818		830.701	-0.0129386		830.701	-0.00843694		830.701	-0.00530333		830.701	-0.0118445		830.701	-0.00899958		830.701	-0.00942358
	831.183	-0.0108941		831.183	-0.00739531		831.183	-0.012204		831.183	-0.0118101		831.183	-0.0154975		831.183	-0.0112521		831.183	-0.0143365		831.183	-0.0102105		831.183	-0.00565008		831.183	-0.012582		831.183	-0.00962514		831.183	-0.0103355
	831.665	-0.0106002		831.665	-0.00829689		831.665	-0.0127541		831.665	-0.0128077		831.665	-0.0165028		831.665	-0.0115419		831.665	-0.0153215		831.665	-0.0117449		831.665	-0.00602368		831.665	-0.0129168		831.665	-0.0099775		831.665	-0.0109744
	832.147	-0.0101148		832.147	-0.00899968		832.147	-0.0129648		832.147	-0.0135311		832.147	-0.0171075		832.147	-0.011537		832.147	-0.0157451		832.147	-0.012787		832.147	-0.00634002		832.147	-0.0128768		832.147	-0.0100023		832.147	-0.0112687
	832.629	-0.00945549		832.629	-0.00940766		832.629	-0.0127534		832.629	-0.0138981		832.629	-0.0172066		832.629	-0.0111493		832.629	-0.0155671		832.629	-0.0132197		832.629	-0.0065483		832.629	-0.0125751		832.629	-0.00969008		832.629	-0.0112283
	833.111	-0.00871359		833.111	-0.00951932		833.111	-0.0121101		833.111	-0.013865		833.111	-0.0167901		833.111	-0.0103564		833.111	-0.014865		833.111	-0.0130892		833.111	-0.00665795		833.111	-0.0121688		833.111	-0.00908639		833.111	-0.0109563
	833.593	-0.00803402		833.593	-0.00942462		833.593	-0.0111292		833.593	-0.0134541		833.593	-0.015945		833.593	-0.0092327		833.593	-0.0138112		833.593	-0.0125816		833.593	-0.00673391		833.593	-0.0118208		833.593	-0.00829939		833.593	-0.0106239
	834.076	-0.00756783		834.076	-0.00927668		834.076	-0.00999638		834.076	-0.012764		834.076	-0.0148285		834.076	-0.00794349		834.076	-0.0126311		834.076	-0.011952		834.076	-0.00687358		834.076	-0.0116468		834.076	-0.00748212		834.076	-0.0104148
	834.558	-0.00741124		834.558	-0.00923192		834.558	-0.00894846		834.558	-0.0119535		834.558	-0.0136216		834.558	-0.0067078		834.558	-0.0115461		834.558	-0.0114392		834.558	-0.0071629		834.558	-0.0116882		834.558	-0.00680228		834.558	-0.0104576
	835.04	-0.00757509		835.04	-0.00939722		835.04	-0.00820911		835.04	-0.0112023		835.04	-0.0124806		835.04	-0.00573632		835.04	-0.0107256		835.04	-0.0111889		835.04	-0.00764056		835.04	-0.0118996		835.04	-0.00640274		835.04	-0.0107726
	835.522	-0.00799213		835.522	-0.00978676		835.522	-0.00793093		835.522	-0.0106698		835.522	-0.0115113		835.522	-0.00517588		835.522	-0.0102566		835.522	-0.0112293		835.522	-0.0082793		835.522	-0.0121752		835.522	-0.00636585		835.522	-0.0112633
	836.004	-0.00855784		836.004	-0.010326		836.004	-0.00816411		836.004	-0.0104657		836.004	-0.0107719		836.004	-0.00508092		836.004	-0.0101507		836.004	-0.0114928		836.004	-0.00899688		836.004	-0.0123871		836.004	-0.00670519		836.004	-0.0117529
	836.486	-0.00918047		836.486	-0.0108772		836.486	-0.0088587		836.486	-0.0106377		836.486	-0.0102892		836.486	-0.00541689		836.486	-0.010362		836.486	-0.0118683		836.486	-0.00967735		836.486	-0.0124353		836.486	-0.00736847		836.486	-0.0120464
	836.968	-0.00981925		836.968	-0.0112994		836.968	-0.00989365		836.968	-0.0111821		836.968	-0.0100845		836.968	-0.0060906		836.968	-0.0108268		836.968	-0.0122619		836.968	-0.0102132		836.968	-0.0122813		836.968	-0.0082625		836.968	-0.0120041
	837.451	-0.0104895		837.451	-0.0115009		837.451	-0.0111155		837.451	-0.0120492		837.451	-0.0101742		837.451	-0.00699159		837.451	-0.0114809		837.451	-0.0126305		837.451	-0.010532		837.451	-0.0119692		837.451	-0.00927688		837.451	-0.0115903
	837.933	-0.0112385		837.933	-0.0114803		837.933	-0.0123745		837.933	-0.0131582		837.933	-0.0105581		837.933	-0.00802589		837.933	-0.0122737		837.933	-0.0129857		837.933	-0.0106225		837.933	-0.011611		837.933	-0.0103085		837.933	-0.0108866
	838.415	-0.0121009		838.415	-0.0113232		838.415	-0.0135482		838.415	-0.0143972		838.415	-0.0111929		838.415	-0.00913145		838.415	-0.0131596		838.415	-0.0133684		838.415	-0.0105291		838.415	-0.0113457		838.415	-0.0112729		838.415	-0.0100582
	838.897	-0.0130632		838.897	-0.0111699		838.897	-0.0145467		838.897	-0.0156263		838.897	-0.0119794		838.897	-0.0102704		838.897	-0.0140846		838.897	-0.0138056		838.897	-0.0103352		838.897	-0.0112856		838.897	-0.012107		838.897	-0.00929202
	839.379	-0.0140554		839.379	-0.0111546		839.379	-0.0153079		839.379	-0.0166859		839.379	-0.0127729		839.379	-0.0114087		839.379	-0.0149768		839.379	-0.0142911		839.379	-0.0101344		839.379	-0.0114778		839.379	-0.0127642		839.379	-0.00873766
	839.861	-0.0149716		839.861	-0.0113533		839.861	-0.0157893		839.861	-0.0174114		839.861	-0.0134179		839.861	-0.0124941		839.861	-0.0157475		839.861	-0.0147779		839.861	-0.010011		839.861	-0.0118867		839.861	-0.0132076		839.861	-0.00846918
	840.343	-0.0157096		840.343	-0.0117552		840.343	-0.0159737		840.343	-0.0176664		840.343	-0.0137913		840.343	-0.0134469		840.343	-0.0163043		840.343	-0.0152005		840.343	-0.010018		840.343	-0.0124133		840.343	-0.0134103		840.343	-0.00848234
	840.825	-0.0162126		840.825	-0.0122725		840.825	-0.0158748		840.825	-0.0173816		840.825	-0.013847		840.825	-0.0141725		840.825	-0.0165791		840.825	-0.0155057		840.825	-0.0101776		840.825	-0.0129295		840.825	-0.013364		840.825	-0.00871872
	841.308	-0.0164933		841.308	-0.0127783		841.308	-0.0155564		841.308	-0.0165937		841.308	-0.0136325		841.308	-0.0145927		841.308	-0.0165543		841.308	-0.0156772		841.308	-0.0104788		841.308	-0.0133297		841.308	-0.0130899		841.308	-0.00909774
	841.79	-0.0166225		841.79	-0.0131607		841.79	-0.0151223		841.79	-0.0154561		841.79	-0.0132757		841.79	-0.0146768		841.79	-0.0162739		841.79	-0.0157386		841.79	-0.0108846		841.79	-0.0135603		841.79	-0.0126426		841.79	-0.00954165
	842.272	-0.0166955		842.272	-0.0133682		842.272	-0.0146988		842.272	-0.0142123		842.272	-0.0129367		842.272	-0.0144623		842.272	-0.015832		842.272	-0.015739		842.272	-0.0113358		842.272	-0.0136345		842.272	-0.0121013		842.272	-0.00998783
	842.754	-0.0167837		842.754	-0.013427		842.754	-0.0143921		842.754	-0.0131294		842.754	-0.0127514		842.754	-0.0140462		842.754	-0.0153404		842.754	-0.0157197		842.754	-0.0117638		842.754	-0.0136101		842.754	-0.011551		842.754	-0.0103849
	843.236	-0.0169023		843.236	-0.0134167		843.236	-0.0142536		843.236	-0.0124232		843.236	-0.012789		843.236	-0.0135544		843.236	-0.0148864		843.236	-0.0156925		843.236	-0.0120956		843.236	-0.0135563		843.236	-0.0110576		843.236	-0.0106861
	843.718	-0.0170061		843.718	-0.0134323		843.718	-0.0142609		843.718	-0.0121992		843.718	-0.0130445		843.718	-0.0131031		843.718	-0.0145056		843.718	-0.0156304		843.718	-0.0122697		843.718	-0.0135165		843.718	-0.0106592		843.718	-0.0108444
	844.2	-0.0170171		844.2	-0.0135353		844.2	-0.0143299		844.2	-0.0124297		844.2	-0.0134567		844.2	-0.0127648		844.2	-0.0141731		844.2	-0.0154799		844.2	-0.0122389		844.2	-0.0134934		844.2	-0.0103608		844.2	-0.0108188
	844.682	-0.0168634		844.682	-0.0137262		844.682	-0.0143441		844.682	-0.0129712		844.682	-0.0139433		844.682	-0.0125519		844.682	-0.0138251		844.682	-0.0151842		844.682	-0.0119805		844.682	-0.0134472		844.682	-0.0101428		844.682	-0.010593
	845.164	-0.0165179		845.164	-0.0139413		845.164	-0.0141987		845.164	-0.0136124		845.164	-0.0144249		845.164	-0.0124217		845.164	-0.0133863		845.164	-0.014706		845.164	-0.0114966		845.164	-0.0133248		845.164	-0.00997235		845.164	-0.0101911
	845.647	-0.0160049		845.647	-0.0140797		845.647	-0.0138318		845.647	-0.0141363		845.647	-0.0148345		845.647	-0.0122952		845.647	-0.0128099		845.647	-0.0140365		845.647	-0.0108108		845.647	-0.0130835		845.647	-0.0098108		845.647	-0.00968162
	846.129	-0.0153847		846.129	-0.0140401		846.129	-0.013242		846.129	-0.0143787		846.129	-0.0151046		846.129	-0.0120882		846.129	-0.0120963		846.129	-0.0131918		846.129	-0.00995797		846.129	-0.0127136		846.129	-0.00961432		846.129	-0.00916425
	846.611	-0.0147113		846.611	-0.0137641		846.611	-0.0124748		846.611	-0.0142607		846.611	-0.0151539		846.611	-0.0117388		846.611	-0.0112958		846.611	-0.0122014		846.611	-0.00897296		846.611	-0.0122395		846.611	-0.00933869		846.611	-0.00874194
	847.093	-0.0139991		847.093	-0.013252		847.093	-0.0116032		847.093	-0.0137955		847.093	-0.0148849		847.093	-0.0112237		847.093	-0.0104914		847.093	-0.0111013		847.093	-0.00788503		847.093	-0.0117102		847.093	-0.00893963		847.093	-0.00848926
	847.575	-0.0132078		847.575	-0.01256		847.575	-0.0106982		847.575	-0.013069		847.575	-0.0142035		847.575	-0.0105626		847.575	-0.0097727		847.575	-0.00993621		847.575	-0.00672611		847.575	-0.0111745		847.575	-0.00838465		847.575	-0.00843333
	848.057	-0.0122666		848.057	-0.0117786		848.057	-0.00982356		848.057	-0.0122105		848.057	-0.0130611		848.057	-0.00980924		848.057	-0.00920785		848.057	-0.00877312		848.057	-0.00553978		848.057	-0.0106694		848.057	-0.00766951		848.057	-0.0085453
	848.539	-0.0111187		848.539	-0.0110062		848.539	-0.00903275		848.539	-0.0113687		848.539	-0.0115015		848.539	-0.00903716		848.539	-0.00883146		848.539	-0.00771166		848.539	-0.0043983		848.539	-0.0102118		848.539	-0.00683526		848.539	-0.0087561
	849.021	-0.00976949		849.021	-0.0103216		849.021	-0.00837971		849.021	-0.010682		849.021	-0.00968373		849.021	-0.00831831		849.021	-0.00863629		849.021	-0.00687394		849.021	-0.00339963		849.021	-0.00980856		849.021	-0.00597313		849.021	-0.00897378
	849.504	-0.00831512		849.504	-0.00976946		849.504	-0.00791568		849.504	-0.0102567		849.504	-0.00786469		849.504	-0.00770352		849.504	-0.00857945		849.504	-0.00637437		849.504	-0.00265893		849.504	-0.00946411		849.504	-0.00521471		849.504	-0.00910738
	849.986	-0.00692582		849.986	-0.00935526		849.986	-0.00768135		849.986	-0.0101441		849.986	-0.00632973		849.986	-0.00720448		849.986	-0.00859348		849.986	-0.00627186		849.986	-0.00227284		849.986	-0.00919108		849.986	-0.00469694		849.986	-0.00908483
	850.468	-0.00579779		850.468	-0.00905741		850.468	-0.00768822		850.468	-0.010331		850.468	-0.00530297		850.468	-0.00679364		850.468	-0.00860732		850.468	-0.00653508		850.468	-0.00229409		850.468	-0.00900776		850.468	-0.00452476		850.468	-0.00886737
	850.95	-0.00509003		850.95	-0.00884107		850.95	-0.00790855		850.95	-0.0107454		850.95	-0.0048758		850.95	-0.00641329		850.95	-0.0085619		850.95	-0.00704102		850.95	-0.00270909		850.95	-0.00893233		850.95	-0.00474089		850.95	-0.00845202
	851.432	-0.00486945		851.432	-0.00867537		851.432	-0.00826825		851.432	-0.0112727		851.432	-0.00498231		851.432	-0.00600189		851.432	-0.00842196		851.432	-0.00760387		851.432	-0.00344036		851.432	-0.00896618		851.432	-0.00531409		851.432	-0.0078723
	851.914	-0.00509265		851.914	-0.00853991		851.914	-0.00866091		851.914	-0.011782		851.914	-0.00542815		851.914	-0.00551953		851.914	-0.0081778		851.914	-0.00803168		851.914	-0.00435411		851.914	-0.0090869		851.914	-0.00615029		851.914	-0.00719112
	852.396	-0.00562156		852.396	-0.00842836		852.396	-0.008968		852.396	-0.0121567		852.396	-0.00596133		852.396	-0.00496897		852.396	-0.00784969		852.396	-0.00818778		852.396	-0.00529187		852.396	-0.00924094		852.396	-0.00711394		852.396	-0.00649725
	852.879	-0.00627386		852.879	-0.00834103		852.879	-0.00909099		852.879	-0.0123208		852.879	-0.00635053		852.879	-0.00440692		852.879	-0.00747476		852.879	-0.00803695		852.879	-0.00609691		852.879	-0.00935549		852.879	-0.00805835		852.879	-0.00588932
	853.361	-0.00688649		853.361	-0.00828353		853.361	-0.00897488		853.361	-0.0122589		853.361	-0.00645426		853.361	-0.00393327		853.361	-0.00710178		853.361	-0.00765883		853.361	-0.00665609		853.361	-0.00935552		853.361	-0.00885351		853.361	-0.00545946
	853.843	-0.00736834		853.843	-0.0082557		853.843	-0.00862187		853.843	-0.0120153		853.843	-0.006246		853.843	-0.00366338		853.843	-0.00677377		853.843	-0.00721576		853.843	-0.0069193		853.843	-0.00918605		853.843	-0.00939998		853.843	-0.00526925
	854.325	-0.00772357		854.325	-0.00825427		854.325	-0.00808304		854.325	-0.0116745		854.325	-0.00580178		854.325	-0.00369531		854.325	-0.00652108		854.325	-0.00689103		854.325	-0.00691167		854.325	-0.00882835		854.325	-0.00963985		854.325	-0.00533792
	854.807	-0.00803298		854.807	-0.0082714		854.807	-0.0074458		854.807	-0.011337		854.807	-0.0052556		854.807	-0.00408008		854.807	-0.00635703		854.807	-0.00682968		854.807	-0.00671818		854.807	-0.0083068		854.807	-0.00955128		854.807	-0.00564583
	855.289	-0.00840272		855.289	-0.0082979		855.289	-0.00680822		855.289	-0.0110881		855.289	-0.00475		855.289	-0.0048103		855.289	-0.00628146		855.289	-0.00709076		855.289	-0.00645886		855.289	-0.00767856		855.289	-0.00914596		855.289	-0.00614777
	855.771	-0.00890697		855.771	-0.0083265		855.771	-0.00626553		855.771	-0.0109777		855.771	-0.00439918		855.771	-0.00582159		855.771	-0.0062831		855.771	-0.00764698		855.771	-0.00624926		855.771	-0.00702302		855.771	-0.00846986		855.771	-0.0067862
	856.253	-0.00954444		856.253	-0.00835189		856.253	-0.0058956		856.253	-0.0110152		856.253	-0.0042762		856.253	-0.00700555		856.253	-0.00634785		856.253	-0.00840165		856.253	-0.0061708		856.253	-0.00642099		856.253	-0.00761035		856.253	-0.00750654
	856.736	-0.010227		856.736	-0.00836859		856.736	-0.00574858		856.736	-0.0111654		856.736	-0.00440892		856.736	-0.00822657		856.736	-0.00645569		856.736	-0.00922803		856.736	-0.00624211		856.736	-0.00594146		856.736	-0.00669384		856.736	-0.00825281
	857.218	-0.0108033		857.218	-0.00837158		857.218	-0.00583254		857.218	-0.0113608		857.218	-0.00478372		857.218	-0.00934469		857.218	-0.00658126		857.218	-0.0100018		857.218	-0.00641508		857.218	-0.00562653		857.218	-0.00587376		857.218	-0.00896268
	857.7	-0.0111118		857.7	-0.0083528		857.7	-0.00610847		857.7	-0.0115151		857.7	-0.00534935		857.7	-0.0102336		857.7	-0.00669821		857.7	-0.0106265		857.7	-0.0065887		857.7	-0.005486		857.7	-0.00529681		857.7	-0.00956136
	858.182	-0.0110385		858.182	-0.00830797		858.182	-0.00649225		858.182	-0.0115459		858.182	-0.00602185		858.182	-0.0108033		858.182	-0.00678796		858.182	-0.011042		858.182	-0.00664594		858.182	-0.00550033		858.182	-0.00506805		858.182	-0.00996506
	858.664	-0.0105572		858.664	-0.00823649		858.664	-0.00687635		858.664	-0.0113977		858.664	-0.0066973		858.664	-0.0110068		858.664	-0.00685245		858.664	-0.011224		858.664	-0.00649816		858.664	-0.00562912		858.664	-0.00521959		858.664	-0.0100971
	859.146	-0.00973544		859.146	-0.00814915		859.146	-0.00715847		859.146	-0.0110599		859.146	-0.00726897		859.146	-0.0108485		859.146	-0.00692501		859.146	-0.0111775		859.146	-0.00612732		859.146	-0.00582355		859.146	-0.0057064		859.146	-0.00991218
	859.628	-0.00871515		859.628	-0.00807117		859.628	-0.00727878		859.628	-0.0105747		859.628	-0.00765306		859.628	-0.0103824		859.628	-0.007067		859.628	-0.0109356		859.628	-0.00560023		859.628	-0.00603741		859.628	-0.00642363		859.628	-0.00941911
	860.11	-0.00766645		860.11	-0.00804137		860.11	-0.00724046		860.11	-0.010032		860.11	-0.00781441		860.11	-0.00970648		860.11	-0.00735616		860.11	-0.0105605		860.11	-0.0050615		860.11	-0.00622898		860.11	-0.00723916		860.11	-0.00869674
	860.592	-0.00673821		860.592	-0.00810197		860.592	-0.00711303		860.592	-0.00954139		860.592	-0.007775		860.592	-0.00894658		860.592	-0.00784868		860.592	-0.0101365		860.592	-0.00469573		860.592	-0.00636568		860.592	-0.00802827		860.592	-0.00788324
	861.075	-0.00601381		861.075	-0.00828571		861.075	-0.00700173		861.075	-0.00919306		861.075	-0.0076097		861.075	-0.00823171		861.075	-0.00854332		861.075	-0.00975365		861.075	-0.00466623		861.075	-0.0064206		861.075	-0.00869908		861.075	-0.00713845
	861.557	-0.00549562		861.557	-0.00859676		861.557	-0.0070032		861.557	-0.00901769		861.557	-0.00741287		861.557	-0.00766264		861.557	-0.00935517		861.557	-0.0094799		861.557	-0.00506052		861.557	-0.00637626		861.557	-0.00919903		861.557	-0.00659461
	862.039	-0.005114		862.039	-0.00900198		862.039	-0.00715514		862.039	-0.00896375		862.039	-0.00726096		862.039	-0.00728872		862.039	-0.0101229		862.039	-0.00933464		862.039	-0.00585408		862.039	-0.0062263		862.039	-0.00950719		862.039	-0.0063086
	862.521	-0.00476839		862.521	-0.00942498		862.521	-0.00741733		862.521	-0.00891301		862.521	-0.00718046		862.521	-0.00710367		862.521	-0.0106489		862.521	-0.00927801		862.521	-0.00691359		862.521	-0.00598339		862.521	-0.00961513		862.521	-0.0062491
	863.003	-0.00436976		863.003	-0.00976515		863.003	-0.00768334		863.003	-0.00872506		863.003	-0.00714432		863.003	-0.00706368		863.003	-0.0107663		863.003	-0.00922264		863.003	-0.00803929		863.003	-0.00568364		863.003	-0.00951737		863.003	-0.00631876
	863.485	-0.00387725		863.485	-0.00991552		863.485	-0.00782941		863.485	-0.00829474		863.485	-0.00708995		863.485	-0.00711583		863.485	-0.0104025		863.485	-0.00906546		863.485	-0.00901389		863.485	-0.00538963		863.485	-0.00921395		863.485	-0.00639876
	863.967	-0.00331096		863.967	-0.0097994		863.967	-0.00777402		863.967	-0.0076081		863.967	-0.00696394		863.967	-0.00722883		863.967	-0.00963204		863.967	-0.00873064		863.967	-0.00966192		863.967	-0.0051787		863.967	-0.00872743		863.967	-0.00640921
	864.449	-0.0027407		864.449	-0.0093944		864.449	-0.0075267		864.449	-0.0067586		864.449	-0.00675041		864.449	-0.00740707		864.449	-0.0086742		864.449	-0.00819819		864.449	-0.00988468		864.449	-0.00512477		864.449	-0.00811998		864.449	-0.00634207
	864.932	-0.00225382		864.932	-0.00874941		864.932	-0.00719353		864.932	-0.00592564		864.932	-0.0064901		864.932	-0.00768341		864.932	-0.00784172		864.932	-0.00751224		864.932	-0.00968289		864.932	-0.00527027		864.932	-0.00750026		864.932	-0.00626625
	865.414	-0.00192258		865.414	-0.00797547		865.414	-0.00694314		865.414	-0.00530693		865.414	-0.00626252		865.414	-0.00809107		865.414	-0.0074374		865.414	-0.00676004		865.414	-0.00914054		865.414	-0.00560475		865.414	-0.00700473		865.414	-0.00629361
	865.896	-0.00178081		865.896	-0.00722094		865.896	-0.00694024		865.896	-0.00504378		865.896	-0.00615316		865.896	-0.00863441		865.896	-0.00765144		865.896	-0.00603263		865.896	-0.0083981		865.896	-0.00606208		865.896	-0.00676607		865.896	-0.00652705
	866.378	-0.00182499		866.378	-0.00662809		866.378	-0.00727898		866.378	-0.0051694		866.378	-0.00621582		866.378	-0.00926679		866.378	-0.00848848		866.378	-0.00539238		866.378	-0.00761514		866.378	-0.00654033		866.378	-0.00687149		866.378	-0.00701151
	866.86	-0.00203314		866.86	-0.00630191		866.86	-0.00794837		866.86	-0.00560164		866.86	-0.00645507		866.86	-0.00989618		866.86	-0.00976985		866.86	-0.00485834		866.86	-0.00694229		866.86	-0.0069359		866.86	-0.00734238		866.86	-0.00771355
	867.342	-0.00239128		867.342	-0.00628613		867.342	-0.00884085		867.342	-0.00618015		867.342	-0.006832		867.342	-0.0104119		867.342	-0.0111897		867.342	-0.0044208		867.342	-0.00649699		867.342	-0.00718525		867.342	-0.0081287		867.342	-0.00852766
	867.824	-0.00291207		867.824	-0.00656236		867.824	-0.00979674		867.824	-0.00673087		867.824	-0.00729018		867.824	-0.010725		867.824	-0.0124193		867.824	-0.00407119		867.824	-0.00635729		867.824	-0.00728764		867.824	-0.00912532		867.824	-0.0093168
	868.307	-0.0036319		868.307	-0.0070595		868.307	-0.0106651		868.307	-0.00712486		868.307	-0.00777982		868.307	-0.0108069		868.307	-0.0132068		868.307	-0.00383038		868.307	-0.00654331		868.307	-0.0073138		868.307	-0.0102021		868.307	-0.00995324
	868.789	-0.0045883		868.789	-0.00767999		868.789	-0.0113502		868.789	-0.00731208		868.789	-0.00827433		868.789	-0.0107042		868.789	-0.0134524		868.789	-0.00375628		868.789	-0.00701504		868.789	-0.00737505		868.789	-0.0112323		868.789	-0.0103593
	869.271	-0.00578585		869.271	-0.00832543		869.271	-0.0118342		869.271	-0.00731771		869.271	-0.00876149		869.271	-0.0105255		869.271	-0.0132268		869.271	-0.00392979		869.271	-0.00766772		869.271	-0.00757815		869.271	-0.012114		869.271	-0.010521
	869.753	-0.00716309		869.753	-0.00891941		869.753	-0.0121516		869.753	-0.00720461		869.753	-0.00922125		869.753	-0.0103937		869.753	-0.0127253		869.753	-0.00441174		869.753	-0.00835026		869.753	-0.00796971		869.753	-0.0127727		869.753	-0.0104786
	870.235	-0.00858484		870.235	-0.0094101		870.235	-0.0123514		870.235	-0.00703062		870.235	-0.00960469		870.235	-0.0103976		870.235	-0.0121844		870.235	-0.0052118		870.235	-0.00889659		870.235	-0.00851077		870.235	-0.0131557		870.235	-0.0103015
	870.717	-0.00985974		870.717	-0.00977228		870.717	-0.0124583		870.717	-0.00682384		870.717	-0.00983454		870.717	-0.0105597		870.717	-0.0117987		870.717	-0.00627059		870.717	-0.00917035		870.717	-0.00908259		870.717	-0.0132244		870.717	-0.0100637
	871.199	-0.0107792		871.199	-0.00999136		871.199	-0.0124586		871.199	-0.00658456		871.199	-0.00982492		871.199	-0.0108303		871.199	-0.0116595		871.199	-0.0074658		871.199	-0.00909495		871.199	-0.00953121		871.199	-0.0129577		871.199	-0.00982512
	871.681	-0.0111753		871.681	-0.0100621		871.681	-0.0123163		871.681	-0.00631788		871.681	-0.00952755		871.681	-0.0111177		871.681	-0.0117521		871.681	-0.00864695		871.681	-0.00868462		871.681	-0.00972576		871.681	-0.0123694		871.681	-0.00963801
	872.163	-0.0109723		872.163	-0.00998589		872.163	-0.0120098		872.163	-0.00605963		872.163	-0.00896881		872.163	-0.0113333		872.163	-0.0119802		872.163	-0.00967401		872.163	-0.00803975		872.163	-0.00961335		872.163	-0.0115283		872.163	-0.00954564
	872.646	-0.0102193		872.646	-0.00977957		872.646	-0.0115597		872.646	-0.00588703		872.646	-0.0082662		872.646	-0.0114277		872.646	-0.0122202		872.646	-0.0104537		872.646	-0.00732338		872.646	-0.00924272		872.646	-0.010565		872.646	-0.00958632
	873.128	-0.0090808		873.128	-0.00947779		873.128	-0.0110342		873.128	-0.0058923		873.128	-0.00759518		873.128	-0.0114074		873.128	-0.0123708		873.128	-0.0109494		873.128	-0.00670529		873.128	-0.00874282		873.128	-0.00964961		873.128	-0.00977964
	873.61	-0.00778568		873.61	-0.00913583		873.61	-0.0105218		873.61	-0.00613386		873.61	-0.00712858		873.61	-0.0113194		873.61	-0.0123801		873.61	-0.0111675		873.61	-0.00631259		873.61	-0.00826601		873.61	-0.00894771		873.61	-0.0101118
	874.092	-0.00655897		874.092	-0.0088139		874.092	-0.0100921		874.092	-0.00659409		874.092	-0.00696652		874.092	-0.0112124		874.092	-0.0122455		874.092	-0.0111296		874.092	-0.00619419		874.092	-0.00792335		874.092	-0.00856782		874.092	-0.0105216
	874.574	-0.00555794		874.574	-0.00856457		874.574	-0.00976068		874.574	-0.00716388		874.574	-0.00710041		874.574	-0.0111046		874.574	-0.0119962		874.574	-0.0108465		874.574	-0.00632594		874.574	-0.0077405		874.574	-0.00852906		874.574	-0.0109037
	875.056	-0.00484395		875.056	-0.00841786		875.056	-0.00948583		875.056	-0.00767185		875.056	-0.00741662		875.056	-0.0109712		875.056	-0.0116726		875.056	-0.0103207		875.056	-0.0066309		875.056	-0.00766199		875.056	-0.00876188		875.056	-0.0111259
	875.538	-0.00438327		875.538	-0.00837145		875.538	-0.00919011		875.538	-0.00794362		875.538	-0.0077462		875.538	-0.0107561		875.538	-0.0113149		875.538	-0.00956207		875.538	-0.0070195		875.538	-0.00758515		875.538	-0.00913493		875.538	-0.0110688
	876.02	-0.00408219		876.02	-0.00839096		876.02	-0.00880542		876.02	-0.00787012		876.02	-0.0079296		876.02	-0.0104083		876.02	-0.0109577		876.02	-0.00862015		876.02	-0.00741277		876.02	-0.00742457		876.02	-0.00950671		876.02	-0.0106647
	876.503	-0.00383748		876.503	-0.00842644		876.503	-0.00831226		876.503	-0.00745815		876.503	-0.00788177		876.503	-0.00991804		876.503	-0.0106341		876.503	-0.00760215		876.503	-0.0077585		876.503	-0.00716534		876.503	-0.0097786		876.503	-0.00993109
	876.985	-0.00358195		876.985	-0.00842933		876.985	-0.00775785		876.985	-0.00682988		876.985	-0.00761152		876.985	-0.00933334		876.985	-0.0103686		876.985	-0.0066646		876.985	-0.00802059		876.985	-0.00688261		876.985	-0.00991992		876.985	-0.00897176
	877.467	-0.00330642		877.467	-0.00837932		877.467	-0.00723616		877.467	-0.00617208		877.467	-0.00720409		877.467	-0.00874886		877.467	-0.0101745		877.467	-0.00597313		877.467	-0.00816287		877.467	-0.00671456		877.467	-0.00996565		877.467	-0.00794847
	877.949	-0.00305367		877.949	-0.00829136		877.949	-0.00684912		877.949	-0.005663		877.949	-0.00676708		877.949	-0.00826594		877.949	-0.0100413		877.949	-0.00565489		877.949	-0.00813514		877.949	-0.00680358		877.949	-0.00997653		877.949	-0.00702909
	878.431	-0.00288706		878.431	-0.00821734		878.431	-0.00666379		878.431	-0.00541038		878.431	-0.00637861		878.431	-0.00795374		878.431	-0.0099365		878.431	-0.00575891		878.431	-0.00788053		878.431	-0.00722834		878.431	-0.00999745		878.431	-0.00634374
	878.913	-0.00285457		878.913	-0.00822735		878.913	-0.00668927		878.913	-0.00542481		878.913	-0.00605678		878.913	-0.00781877		878.913	-0.00980918		878.913	-0.00624067		878.913	-0.00735251		878.913	-0.00796213		878.913	-0.0100249		878.913	-0.00594812
	879.395	-0.00295795		879.395	-0.0083878		879.395	-0.00687671		879.395	-0.00564266		879.395	-0.00576915		879.395	-0.00780397		879.395	-0.00961416		879.395	-0.00697565		879.395	-0.00655026		879.395	-0.00886513		879.395	-0.0100053		879.395	-0.00582051
	879.877	-0.00314806		879.877	-0.0087358		879.877	-0.00715006		879.877	-0.00597028		879.877	-0.00546509		879.877	-0.007815		879.877	-0.00933419		879.877	-0.00779925		879.877	-0.00554325		879.877	-0.00972621		879.877	-0.00986324		879.877	-0.0058734
	880.36	-0.00333976		880.36	-0.00926086		880.36	-0.00743336		880.36	-0.00633489		880.36	-0.00511459		880.36	-0.007761		880.36	-0.00899685		880.36	-0.00855001		880.36	-0.00447547		880.36	-0.0103281		880.36	-0.00954227		880.36	-0.00598349
	880.842	-0.00344674		880.842	-0.00989994		880.842	-0.0076797		880.842	-0.00670611		880.842	-0.00472916		880.842	-0.00759081		880.842	-0.00867082		880.842	-0.00911098		880.842	-0.00353335		880.842	-0.0105202		880.842	-0.0090367		880.842	-0.00602669
	881.324	-0.00341827		881.324	-0.0105569		881.324	-0.00787497		881.324	-0.00708868		881.324	-0.00435729		881.324	-0.0073156		881.324	-0.0084475		881.324	-0.00943107		881.324	-0.0028973		881.324	-0.0102665		881.324	-0.00840418		881.324	-0.00590903
	881.806	-0.00326318		881.806	-0.0111256		881.806	-0.00802739		881.806	-0.00748746		881.806	-0.00405448		881.806	-0.00699808		881.806	-0.00840217		881.806	-0.0095223		881.806	-0.0026893		881.806	-0.00965266		881.806	-0.0077435		881.806	-0.00558552
	882.288	-0.00304571		882.288	-0.0115195		882.288	-0.00814424		882.288	-0.00787172		882.288	-0.00385275		882.288	-0.00672503		882.288	-0.00856707		882.288	-0.00943684		882.288	-0.00294739		882.288	-0.00885315		882.288	-0.00716156		882.288	-0.00506533
	882.77	-0.00286527		882.77	-0.0116899		882.77	-0.0082203		882.77	-0.0081619		882.77	-0.00374571		882.77	-0.00657389		882.77	-0.00891064		882.77	-0.00924499		882.77	-0.00362421		882.77	-0.00808346		882.77	-0.00674209		882.77	-0.00440213
	883.252	-0.00282182		883.252	-0.0116377		883.252	-0.00823918		883.252	-0.00825456		883.252	-0.0037028		883.252	-0.00658694		883.252	-0.00935432		883.252	-0.00901668		883.252	-0.00461472		883.252	-0.00754341		883.252	-0.00653188		883.252	-0.00368684
	883.734	-0.002983		883.734	-0.0114059		883.734	-0.00819071		883.734	-0.00806746		883.734	-0.00369978		883.734	-0.00676457		883.734	-0.00979389		883.734	-0.00881409		883.734	-0.00578599		883.734	-0.00737753		883.734	-0.00654637		883.734	-0.00302669
	884.217	-0.00336294		884.217	-0.0110689		884.217	-0.00808554		884.217	-0.00758837		884.217	-0.00375346		884.217	-0.007073		884.217	-0.0101432		884.217	-0.0086828		884.217	-0.00701334		884.217	-0.00764245		884.217	-0.00678858		884.217	-0.00252584
	884.699	-0.00391711		884.699	-0.0107041		884.699	-0.00796187		884.699	-0.00689546		884.699	-0.00393071		884.699	-0.00746186		884.699	-0.0103611		884.699	-0.00864422		884.699	-0.00819377		884.699	-0.00829715		884.699	-0.00725978		884.699	-0.00226018
	885.181	-0.00456482		885.181	-0.0103724		885.181	-0.00787321		885.181	-0.00613611		885.181	-0.00433131		885.181	-0.00788167		885.181	-0.0104653		885.181	-0.00868654		885.181	-0.00925255		885.181	-0.00921463		885.181	-0.00796773		885.181	-0.00226268
	885.663	-0.00521795		885.663	-0.0101007		885.663	-0.00786449		885.663	-0.00547677		885.663	-0.00504195		885.663	-0.00829582		885.663	-0.0105163		885.663	-0.00876448		885.663	-0.0101332		885.663	-0.0102141		885.663	-0.00890487		885.663	-0.0025231
	886.145	-0.00580652		886.145	-0.00988358		886.145	-0.00794866		886.145	-0.00504261		886.145	-0.00608475		886.145	-0.00867793		886.145	-0.0105892		886.145	-0.00880117		886.145	-0.0107923		886.145	-0.0110898		886.145	-0.0100258		886.145	-0.0029984
	886.627	-0.00629544		886.627	-0.00969472		886.627	-0.00809982		886.627	-0.00488419		886.627	-0.00738369		886.627	-0.00900909		886.627	-0.0107362		886.627	-0.00870703		886.627	-0.0111948		886.627	-0.011655		886.627	-0.0112222		886.627	-0.00362664
	887.109	-0.00668715		887.109	-0.00950538		887.109	-0.00825859		887.109	-0.00497775		887.109	-0.00876393		887.109	-0.00927059		887.109	-0.0109711		887.109	-0.00840792		887.109	-0.0113256		887.109	-0.0117722		887.109	-0.0123256		887.109	-0.00434617
	887.591	-0.00701393		887.591	-0.00929867		887.591	-0.00835465		887.591	-0.00525043		887.591	-0.00998692		887.591	-0.00944926		887.591	-0.0112591		887.591	-0.0078711		887.591	-0.0112031		887.591	-0.0113898		887.591	-0.0131318		887.591	-0.00509992
	888.074	-0.00732332		888.074	-0.00907616		888.074	-0.00833164		888.074	-0.0056264		888.074	-0.0108196		888.074	-0.00954113		888.074	-0.0115376		888.074	-0.00712796		888.074	-0.0108863		888.074	-0.0105594		888.074	-0.0134557		888.074	-0.00584065
	888.556	-0.00766345		888.556	-0.00885257		888.556	-0.00816177		888.556	-0.00605708		888.556	-0.0111		888.556	-0.00955637		888.556	-0.0117396		888.556	-0.00626853		888.556	-0.0104623		888.556	-0.00942605		888.556	-0.0131853		888.556	-0.00652402
	889.038	-0.00806909		889.038	-0.00865036		889.038	-0.00784735		889.038	-0.00653341		889.038	-0.0107873		889.038	-0.0095213		889.038	-0.0118291		889.038	-0.00541918		889.038	-0.0100256		889.038	-0.00819159		889.038	-0.0123188		889.038	-0.00711065
	889.52	-0.00855541		889.52	-0.0084825		889.52	-0.00740916		889.52	-0.00706755		889.52	-0.00996668		889.52	-0.00946648		889.52	-0.0118143		889.52	-0.00470962		889.52	-0.00964572		889.52	-0.00706387		889.52	-0.0109594		889.52	-0.00756415
	890.002	-0.00911468		890.002	-0.00835667		890.002	-0.00687681		890.002	-0.00766804		890.002	-0.00882607		890.002	-0.00941794		890.002	-0.0117541		890.002	-0.00424227		890.002	-0.00936055		890.002	-0.00620674		890.002	-0.00928859		890.002	-0.00786417
	890.484	-0.00972316		890.484	-0.00827683		890.484	-0.00629028		890.484	-0.00832072		890.484	-0.00761364		890.484	-0.00939035		890.484	-0.0117378		890.484	-0.00407844		890.484	-0.00917674		890.484	-0.0057235		890.484	-0.00752563		890.484	-0.00801379
	890.966	-0.0103444		890.966	-0.00825671		890.966	-0.00570686		890.966	-0.00899039		890.966	-0.00659745		890.966	-0.00938571		890.966	-0.0118641		890.966	-0.00423869		890.966	-0.00909375		890.966	-0.00565257		890.966	-0.00589387		890.966	-0.00805435
	891.448	-0.0109365		891.448	-0.00832524		891.448	-0.00521288		891.448	-0.00963655		891.448	-0.00601679		891.448	-0.00939936		891.448	-0.0122016		891.448	-0.00470857		891.448	-0.0091226		891.448	-0.005988		891.448	-0.00459512		891.448	-0.0080643
	891.931	-0.011453		891.931	-0.00852279		891.931	-0.00491132		891.931	-0.0102309		891.931	-0.00603737		891.931	-0.00942404		891.931	-0.0127586		891.931	-0.00544147		891.931	-0.00929144		891.931	-0.00669325		891.931	-0.00378907		891.931	-0.00813875
	892.413	-0.011847		892.413	-0.00888318		892.413	-0.00489693		892.413	-0.0107632		892.413	-0.00670663		892.413	-0.00945348		892.413	-0.0134629		892.413	-0.00636568		892.413	-0.00963243		892.413	-0.00771407		892.413	-0.00357466		892.413	-0.00835992
	892.895	-0.0120657		892.895	-0.00941048		892.895	-0.00520859		892.895	-0.0112227		892.895	-0.00793295		892.895	-0.00947695		892.895	-0.0141679		892.895	-0.00738287		892.895	-0.0101498		892.895	-0.0089717		892.895	-0.00397809		892.895	-0.00875769
	893.377	-0.0120513		893.377	-0.0100569		893.377	-0.00579932		893.377	-0.0115748		893.377	-0.00949215		893.377	-0.0094727		893.377	-0.0146848		893.377	-0.0083788		893.377	-0.0107895		893.377	-0.0103573		893.377	-0.00494368		893.377	-0.0092928
	893.859	-0.0117414		893.859	-0.0107172		893.859	-0.00652633		893.859	-0.0117408		893.859	-0.0110686		893.859	-0.00940193		893.859	-0.0148353		893.859	-0.00923442		893.859	-0.0114314		893.859	-0.0117167		893.859	-0.00633512		893.859	-0.00986557
	894.341	-0.0110865		894.341	-0.0112438		894.341	-0.0071861		894.341	-0.0116108		894.341	-0.0123183		894.341	-0.00921752		894.341	-0.0145049		894.341	-0.0098519		894.341	-0.0119039		894.341	-0.0128656		894.341	-0.00794557		894.341	-0.0103438
	894.823	-0.0100749		894.823	-0.0114862		894.823	-0.00757525		894.823	-0.0110952		894.823	-0.0129502		894.823	-0.00888308		894.823	-0.0136982		894.823	-0.0101866		894.823	-0.0120372		894.823	-0.0136142		894.823	-0.00952645		894.823	-0.0106173
	895.306	-0.00876782		895.306	-0.0113411		895.306	-0.00757398		895.306	-0.0101914		895.306	-0.0128019		895.306	-0.00840262		895.306	-0.0125575		895.306	-0.0102735		895.306	-0.0117228		895.306	-0.0138279		895.306	-0.0108338		895.306	-0.0106388
	895.788	-0.00730546		895.788	-0.01079		895.788	-0.00719115		895.788	-0.00903336		895.788	-0.0118919		895.788	-0.0078382		895.788	-0.0113384		895.788	-0.0102281		895.788	-0.0109669		895.788	-0.0134745		895.788	-0.0116881		895.788	-0.0104467
	896.27	-0.00590148		896.27	-0.00992122		896.27	-0.00657624		896.27	-0.00789062		896.27	-0.0104115		896.27	-0.00730944		896.27	-0.0103363		896.27	-0.0102191		896.27	-0.00990085		896.27	-0.0126505		896.27	-0.0120174		896.27	-0.010149
	896.752	-0.00479434		896.752	-0.00890769		896.752	-0.00596384		896.752	-0.00709846		896.752	-0.00866423		896.752	-0.0069672		896.752	-0.00979136		896.752	-0.0104055		896.752	-0.00874353		896.752	-0.0115538		896.752	-0.0118727		896.752	-0.00988005
	897.234	-0.00418429		897.234	-0.00794909		897.234	-0.00558332		897.234	-0.00694366		897.234	-0.00696261		897.234	-0.0069435		897.234	-0.00980532		897.234	-0.0108777		897.234	-0.00772735		897.234	-0.0104201		897.234	-0.0113922		897.234	-0.0097451
	897.716	-0.00417224		897.716	-0.00721442		897.716	-0.00557341		897.716	-0.00755887		897.716	-0.00554021		897.716	-0.00730902		897.716	-0.0103142		897.716	-0.0116137		897.716	-0.00702808		897.716	-0.00944129		897.716	-0.0107487		897.716	-0.00978676
	898.198	-0.00472588		898.198	-0.00679129		898.198	-0.00593763		898.198	-0.00886068		898.198	-0.00450065		898.198	-0.0080429		898.198	-0.0111071		898.198	-0.0124773		898.198	-0.00670911		898.198	-0.00871665		898.198	-0.0100909		898.198	-0.00997517
	898.68	-0.00567824		898.68	-0.00666969		898.68	-0.00655244		898.68	-0.0105646		898.68	-0.00382546		898.68	-0.00903018		898.68	-0.0119078		898.68	-0.0132592		898.68	-0.00672033		898.68	-0.00823025		898.68	-0.009514		898.68	-0.0102406
	899.163	-0.00676555		899.163	-0.00674725		899.163	-0.00722211		899.163	-0.0122646		899.163	-0.00341488		899.163	-0.01009		899.163	-0.0124556		899.163	-0.0137482		899.163	-0.00692064		899.163	-0.00788714		899.163	-0.00905309		899.163	-0.0105081
	899.645	-0.00770424		899.645	-0.00687325		899.645	-0.00775586		899.645	-0.0135656		899.645	-0.00315947		899.645	-0.0110293		899.645	-0.0125972		899.645	-0.013808		899.645	-0.00714478		899.645	-0.00757274		899.645	-0.00871086		899.645	-0.0107401
	900.127	-0.00828535		900.127	-0.00689911		900.127	-0.00803991		900.127	-0.0142108		900.127	-0.0029906		900.127	-0.0117021		900.127	-0.0123251		900.127	-0.0134332		900.127	-0.00726193		900.127	-0.00721856		900.127	-0.00849098		900.127	-0.0109504
	900.609	-0.00844253		900.609	-0.00672973		900.609	-0.00805851		900.609	-0.0141452		900.609	-0.00290348		900.609	-0.0120461		900.609	-0.0117635		900.609	-0.0127451		900.609	-0.00722241		900.609	-0.00683884		900.609	-0.0084242		900.609	-0.011187
	901.091	-0.00827069		901.091	-0.00634488		901.091	-0.00787575		901.091	-0.0135023		901.091	-0.00293761		901.091	-0.0120851		901.091	-0.0111006		901.091	-0.0119502		901.091	-0.00706205		901.091	-0.00652646		901.091	-0.00856515		901.091	-0.0114981
	901.573	-0.00798523		901.573	-0.00579063		901.573	-0.0075787		901.573	-0.0125169		901.573	-0.00313444		901.573	-0.0118964		901.573	-0.0105114		901.573	-0.0112562		901.573	-0.00687534		901.573	-0.00639902		901.573	-0.00896044		901.573	-0.0118928
	902.055	-0.00784455		902.055	-0.00515447		902.055	-0.00723622		902.055	-0.0114302		902.055	-0.00349582		902.055	-0.0115691		902.055	-0.0100965		902.055	-0.0108099		902.055	-0.006768		902.055	-0.00654304		902.055	-0.00960615		902.055	-0.0123235
	902.537	-0.00805943		902.537	-0.00453295		902.537	-0.00687779		902.537	-0.0104238		902.537	-0.0039704		902.537	-0.0111695		902.537	-0.00987539		902.537	-0.0106559		902.537	-0.00681882		902.537	-0.0069628		902.537	-0.0104132		902.537	-0.0126988
	903.019	-0.00872353		903.019	-0.0040079		903.019	-0.00651801		903.019	-0.00959935		903.019	-0.00446917		903.019	-0.0107386		903.019	-0.00980584		903.019	-0.0107396		903.019	-0.00705579		903.019	-0.00757437		903.019	-0.011207		903.019	-0.0129191
	903.502	-0.00977815		903.502	-0.00363052		903.502	-0.00619024		903.502	-0.00900805		903.502	-0.00490549		903.502	-0.0103024		903.502	-0.00983662		903.502	-0.0109402		903.502	-0.00746092		903.502	-0.00823076		903.502	-0.0117721		903.502	-0.0129214
	903.984	-0.0110371		903.984	-0.00342248		903.984	-0.005978		903.984	-0.00869157		903.984	-0.00523399		903.984	-0.00990052		903.984	-0.00994576		903.984	-0.0111241		903.984	-0.00798604		903.984	-0.00878568		903.984	-0.0119212		903.984	-0.0127078
	904.466	-0.0122515		904.466	-0.00338684		904.466	-0.00600751		904.466	-0.00871496		904.466	-0.00547134		904.466	-0.0096044		904.466	-0.0101593		904.466	-0.0111913		904.466	-0.00858585		904.466	-0.00914596		904.466	-0.011571		904.466	-0.0123468
	904.948	-0.0131886		904.948	-0.00350896		904.948	-0.00640708		904.948	-0.00915919		904.948	-0.00567432		904.948	-0.00950823		904.948	-0.0105255		904.948	-0.0111003		904.948	-0.00922855		904.948	-0.00929783		904.948	-0.0107706		904.948	-0.0119372
	905.43	-0.0136865		905.43	-0.00376433		905.43	-0.0072403		905.43	-0.0100798		905.43	-0.00590201		905.43	-0.00970308		905.43	-0.0110708		905.43	-0.0108603		905.43	-0.00990723		905.43	-0.00928804		905.43	-0.00968568		905.43	-0.0115627
	905.912	-0.0136799		905.912	-0.00410661		905.912	-0.00845686		905.912	-0.01145		905.912	-0.00616914		905.912	-0.010231		905.912	-0.0117528		905.912	-0.010506		905.912	-0.0106153		905.912	-0.00918018		905.912	-0.00854092		905.912	-0.01125
	906.394	-0.013186		906.394	-0.00446025		906.394	-0.00986515		906.394	-0.0131155		906.394	-0.00642723		906.394	-0.0110416		906.394	-0.0124421		906.394	-0.0100681		906.394	-0.0113296		906.394	-0.00899938		906.394	-0.00753872		906.394	-0.0109591
	906.876	-0.0122846		906.876	-0.00471778		906.876	-0.0111693		906.876	-0.014796		906.876	-0.00657467		906.876	-0.0119777		906.876	-0.0129362		906.876	-0.00955141		906.876	-0.0119888		906.876	-0.00871132		906.876	-0.00679122		906.876	-0.0105994
	907.359	-0.0110826		907.359	-0.00475692		907.359	-0.0120439		907.359	-0.0161403		907.359	-0.00650352		907.359	-0.0127951		907.359	-0.0130213		907.359	-0.00892879		907.359	-0.0124946		907.359	-0.00822826		907.359	-0.00628101		907.359	-0.0100696
	907.841	-0.00969037		907.841	-0.00447209		907.841	-0.012244		907.841	-0.016826		907.841	-0.00615085		907.841	-0.0132321		907.841	-0.0125435		907.841	-0.00815582		907.841	-0.0127303		907.841	-0.0074574		907.841	-0.00587667		907.841	-0.00930396
	908.323	-0.00820271		908.323	-0.00382096		908.323	-0.0116816		908.323	-0.0166534		908.323	-0.00554106		908.323	-0.013096		908.323	-0.0114713		908.323	-0.00719004		908.323	-0.0125953		908.323	-0.00635615		908.323	-0.00539601		908.323	-0.00830034
	908.805	-0.00669779		908.805	-0.00284361		908.805	-0.0104536		908.805	-0.0156004		908.805	-0.00477825		908.805	-0.0123275		908.805	-0.00991335		908.805	-0.00602505		908.805	-0.0120317		908.805	-0.00497962		908.805	-0.00468786		908.805	-0.0071248
	909.287	-0.00524133		909.287	-0.00166619		909.287	-0.00879731		909.287	-0.0138128		909.287	-0.00401026		909.287	-0.0110266		909.287	-0.00809114		909.287	-0.00470248		909.287	-0.0110481		909.287	-0.00348313		909.287	-0.00369659		909.287	-0.00588707
	909.769	-0.00390227		909.769	-0.000472632		909.769	-0.00702253		909.769	-0.0115587		909.769	-0.00337537		909.769	-0.00943081		909.769	-0.00628565		909.769	-0.00332565		909.769	-0.00971749		909.769	-0.00210289		909.769	-0.00248841		909.769	-0.00470776
	910.251	-0.00276388		910.251	0.000535677		910.251	-0.00542691		910.251	-0.00917188		910.251	-0.00296276		910.251	-0.00786342		910.251	-0.00478405		910.251	-0.0020521		910.251	-0.00817894		910.251	-0.00109691		910.251	-0.00123414		910.251	-0.00370047
	910.734	-0.00191866		910.734	0.00119347		910.734	-0.00423738		910.734	-0.00698807		910.734	-0.00279146		910.734	-0.00665824		910.734	-0.00382227		910.734	-0.0010669		910.734	-0.00661275		910.734	-0.000692016		910.734	-0.000159014		910.734	-0.00295407
	911.216	-0.00145199		911.216	0.00141318		911.216	-0.0035669		911.216	-0.00529773		911.216	-0.00282679		911.216	-0.00608011		911.216	-0.00354225		911.216	-0.000535811		911.216	-0.00521897		911.216	-0.00101867		911.216	0.000524066		911.216	-0.00253058
	911.698	-0.00142141		911.698	0.00120151		911.698	-0.00341715		911.698	-0.00430149		911.698	-0.00301788		911.698	-0.00626409		911.698	-0.00397073		911.698	-0.00056063		911.698	-0.00417838		911.698	-0.00208792		911.698	0.000675299		911.698	-0.00246954
	912.18	-0.00184139		912.18	0.000629041		912.18	-0.00370819		912.18	-0.00408937		912.18	-0.00334259		912.18	-0.00720184		912.18	-0.00502613		912.18	-0.00114463		912.18	-0.00362881		912.18	-0.00379669		912.18	0.00025471		912.18	-0.0027966
	912.662	-0.00267925		912.662	-0.000214026		912.662	-0.00433331		912.662	-0.00464213		912.662	-0.00383561		912.662	-0.00876503		912.662	-0.00654373		912.662	-0.00219883		912.662	-0.00364932		912.662	-0.00596757		912.662	-0.000682853		912.662	-0.0035253
	913.144	-0.0038586		913.144	-0.00127775		913.144	-0.00520198		913.144	-0.0058449		913.144	-0.0045862		913.144	-0.010762		913.144	-0.00831155		913.144	-0.00357423		913.144	-0.00427		913.144	-0.00839187		913.144	-0.00202585		913.144	-0.00465639
	913.626	-0.00526801		913.626	-0.0025712		913.626	-0.00627069		913.626	-0.00750713		913.626	-0.00570234		913.626	-0.0129812		913.626	-0.010097		913.626	-0.00510313		913.626	-0.00547196		913.626	-0.010864		913.626	-0.00363749		913.626	-0.00615872
	914.108	-0.0067711		914.108	-0.00415735		914.108	-0.00753663		914.108	-0.0093921		914.108	-0.00726213		914.108	-0.0152141		914.108	-0.0116811		914.108	-0.00664702		914.108	-0.00719431		914.108	-0.0131923		914.108	-0.00538446		914.108	-0.00796096
	914.591	-0.00822182		914.591	-0.00609249		914.591	-0.00901905		914.591	-0.0112471		914.591	-0.00925576		914.591	-0.017261		914.591	-0.0128771		914.591	-0.00811302		914.591	-0.00931774		914.591	-0.0152127		914.591	-0.00714099		914.591	-0.00993417
	915.073	-0.00948343		915.073	-0.00836947		915.073	-0.0107163		915.073	-0.0128462		915.073	-0.0115647		915.073	-0.0189262		915.073	-0.0135698		915.073	-0.00945558		915.073	-0.0116607		915.073	-0.0167985		915.073	-0.00879448		915.073	-0.0119065
	915.555	-0.010457		915.555	-0.0108699		915.555	-0.0125799		915.555	-0.0140379		915.555	-0.0139688		915.555	-0.0200288		915.555	-0.0137369		915.555	-0.0106542		915.555	-0.0139796		915.555	-0.0178788		915.555	-0.0102462		915.555	-0.0136907
	916.037	-0.0110965		916.037	-0.0133698		916.037	-0.0144879		916.037	-0.0147666		916.037	-0.0161983		916.037	-0.0204209		916.037	-0.0134583		916.037	-0.0116755		916.037	-0.0159968		916.037	-0.0184449		916.037	-0.0114164		916.037	-0.0151232
	916.519	-0.0114129		916.519	-0.0155859		916.519	-0.0162603		916.519	-0.0150722		916.519	-0.0179942		916.519	-0.0200183		916.519	-0.0128935		916.519	-0.0124579		916.519	-0.0174403		916.519	-0.0185438		916.519	-0.0122452		916.519	-0.0161029
	917.001	-0.0114503		917.001	-0.0172533		917.001	-0.0176791		917.001	-0.0150578		917.001	-0.0191613		917.001	-0.0188327		917.001	-0.0122434		917.001	-0.0129083		917.001	-0.0180942		917.001	-0.0182533		917.001	-0.0126948		917.001	-0.0166029
	917.483	-0.011258		917.483	-0.018193		917.483	-0.0185398		917.483	-0.0148469		917.483	-0.0195954		917.483	-0.0169997		917.483	-0.0116978		917.483	-0.0129391		917.483	-0.0178378		917.483	-0.0176553		917.483	-0.0127447		917.483	-0.0166704
	917.965	-0.0108687		917.965	-0.0183664		917.965	-0.0187048		917.965	-0.014554		917.965	-0.0193022		917.965	-0.0147869		917.965	-0.0114035		917.965	-0.0125214		917.965	-0.0166915		917.965	-0.0168138		917.965	-0.0123996		917.965	-0.0164214
	918.447	-0.0102827		918.447	-0.0178837		918.447	-0.0181585		918.447	-0.0142598		918.447	-0.018396		918.447	-0.0125637		918.447	-0.0114253		918.447	-0.0117324		918.447	-0.0148294		918.447	-0.0157679		918.447	-0.0116882		918.447	-0.0160154
	918.93	-0.00947565		918.93	-0.0169711		918.93	-0.0170305		918.93	-0.0140015		918.93	-0.0170823		918.93	-0.0107154		918.93	-0.0117411		918.93	-0.0107668		918.93	-0.0125654		918.93	-0.0145362		918.93	-0.0106719		918.93	-0.0156238
	919.412	-0.00842323		919.412	-0.0158907		919.412	-0.0155787		919.412	-0.0137764		919.412	-0.0156141		919.412	-0.00953024		919.412	-0.012253		919.412	-0.00989197		919.412	-0.0102793		919.412	-0.0131349		919.412	-0.00944281		919.412	-0.0153901
	919.894	-0.00712408		919.894	-0.0148504		919.894	-0.0141116		919.894	-0.0135396		919.894	-0.0142323		919.894	-0.00910582		919.894	-0.0128223		919.894	-0.00935342		919.894	-0.00831847		919.894	-0.0115935		919.894	-0.00811569		919.894	-0.0153891
	920.376	-0.00562617		920.376	-0.0139366		920.376	-0.0129035		920.376	-0.013218		920.376	-0.0131133		920.376	-0.00932163		920.376	-0.0133107		920.376	-0.00928842		920.376	-0.0069088		920.376	-0.00997481		920.376	-0.00681539		920.376	-0.0156114
	920.858	-0.0040293		920.858	-0.01311		920.858	-0.0121189		920.858	-0.0127186		920.858	-0.0123413		920.858	-0.00989709		920.858	-0.0136151		920.858	-0.00966805		920.858	-0.00611922		920.858	-0.00837916		920.858	-0.00566388		920.858	-0.0159663
	921.34	-0.00248522		921.34	-0.0122638		921.34	-0.0117985		921.34	-0.0119579		921.34	-0.0119144		921.34	-0.0104995		921.34	-0.013683		921.34	-0.0103177		921.34	-0.00587497		921.34	-0.00695184		921.34	-0.00477497		921.34	-0.016314
	921.822	-0.00116889		921.822	-0.0113038		921.822	-0.0118705		921.822	-0.0108976		921.822	-0.0117746		921.822	-0.010859		921.822	-0.0135273		921.822	-0.0109809		921.822	-0.00600659		921.822	-0.00585683		921.822	-0.00423863		921.822	-0.0165111
	922.304	-0.000246315		922.304	-0.0102296		922.304	-0.0122083		922.304	-0.00958003		922.304	-0.0118394		922.304	-0.0108552		922.304	-0.0132118		922.304	-0.0114242		922.304	-0.00631758		922.304	-0.0052555		922.304	-0.00410756		922.304	-0.0164621
	922.787	0.000178331		922.787	-0.0091663		922.787	-0.0126757		922.787	-0.008146		922.787	-0.0120406		922.787	-0.0105437		922.787	-0.0128345		922.787	-0.0115256		922.787	-0.00663703		922.787	-0.00525698		922.787	-0.00437858		922.787	-0.0161505
	923.269	8.85432e-05		923.269	-0.0083292		923.269	-0.0131652		923.269	-0.00681079		923.269	-0.012333		923.269	-0.0101027		923.269	-0.012488		923.269	-0.0113175		923.269	-0.00685352		923.269	-0.00588668		923.269	-0.00498276		923.269	-0.0156464
	923.751	-0.000431456		923.751	-0.00793711		923.751	-0.0135937		923.751	-0.00580122		923.751	-0.0126945		923.751	-0.00973104		923.751	-0.0122282		923.751	-0.0109543		923.751	-0.00692211		923.751	-0.00707166		923.751	-0.00580106		923.751	-0.0150695
	924.233	-0.00122992		924.233	-0.00810616		924.233	-0.0138859		924.233	-0.00528015		924.233	-0.013102		924.233	-0.0095339		924.233	-0.0120475		924.233	-0.0106223		924.233	-0.00684051		924.233	-0.00866228		924.233	-0.00668356		924.233	-0.0145337
	924.715	-0.0021201		924.715	-0.00878575		924.715	-0.0139391		924.715	-0.00529197		924.715	-0.0135104		924.715	-0.0094655		924.715	-0.0118821		924.715	-0.0104388		924.715	-0.00663811		924.715	-0.0104584		924.715	-0.00748036		924.715	-0.0140914
	925.197	-0.00292116		925.197	-0.0097461		925.197	-0.013628		925.197	-0.00574283		925.197	-0.0138367		925.197	-0.00934148		925.197	-0.0116309		925.197	-0.0103892		925.197	-0.00635585		925.197	-0.0122449		925.197	-0.00806528		925.197	-0.0136994
	925.679	-0.00349249		925.679	-0.0106389		925.679	-0.0128402		925.679	-0.00643666		925.679	-0.0139801		925.679	-0.00892006		925.679	-0.0112055		925.679	-0.010328		925.679	-0.0060628		925.679	-0.0138126		925.679	-0.00836174		925.679	-0.0132402
	926.161	-0.00376394		926.161	-0.011102		926.161	-0.0115502		926.161	-0.00714517		926.161	-0.0138457		926.161	-0.00802521		926.161	-0.0105668		926.161	-0.010043		926.161	-0.00586134		926.161	-0.0149926		926.161	-0.00836027		926.161	-0.0125587
	926.644	-0.00375655		926.644	-0.0108895		926.644	-0.00987636		926.644	-0.00769952		926.644	-0.0134037		926.644	-0.00665488		926.644	-0.00976049		926.644	-0.00936642		926.644	-0.00589638		926.644	-0.0156897		926.644	-0.00814063		926.644	-0.0115436
	927.126	-0.00359533		927.126	-0.0099695		927.126	-0.00809683		927.126	-0.00806014		927.126	-0.0127108		927.126	-0.00501634		927.126	-0.00890337		927.126	-0.00827316		927.126	-0.00632545		927.126	-0.0159049		927.126	-0.00786306		927.126	-0.0101877
	927.608	-0.00348556		927.608	-0.00855316		927.608	-0.00658501		927.608	-0.00833281		927.608	-0.0119142		927.608	-0.00348474		927.608	-0.0081551		927.608	-0.00692139		927.608	-0.00727868		927.608	-0.0157385		927.608	-0.00774223		927.608	-0.00862177
	928.09	-0.00366479		928.09	-0.00701712		928.09	-0.0056976		928.09	-0.00871794		928.09	-0.0112137		928.09	-0.00247945		928.09	-0.00765281		928.09	-0.00561956		928.09	-0.00881182		928.09	-0.0153659		928.09	-0.00799375		928.09	-0.00708839
	928.572	-0.00434122		928.572	-0.00579704		928.572	-0.00565862		928.572	-0.00942611		928.572	-0.0108138		928.572	-0.00234363		928.572	-0.00747883		928.572	-0.00473791		928.572	-0.0108787		928.572	-0.0149943		928.572	-0.0087888		928.572	-0.00589158
	929.054	-0.00563402		929.054	-0.00524883		929.054	-0.00649297		929.054	-0.010589		929.054	-0.0108655		929.054	-0.00325038		929.054	-0.00762744		929.054	-0.00460007		929.054	-0.0133134		929.054	-0.0148268		929.054	-0.0102044		929.054	-0.0053101
	929.536	-0.00752878		929.536	-0.00555395		929.536	-0.00801216		929.536	-0.0122148		929.536	-0.0114362		929.536	-0.0051585		929.536	-0.0080282		929.536	-0.00538809		929.536	-0.0158488		929.536	-0.0150146		929.536	-0.0121924		929.536	-0.00553115
	930.018	-0.00986418		930.018	-0.00665318		930.018	-0.00987843		930.018	-0.0141814		930.018	-0.0124776		930.018	-0.00782509		930.018	-0.00856515		930.018	-0.00707844		930.018	-0.0181514		930.018	-0.0156284		930.018	-0.0145681		930.018	-0.00658266
	930.5	-0.0123651		930.5	-0.00825934		930.5	-0.0117077		930.5	-0.0162821		930.5	-0.0138363		930.5	-0.0108628		930.5	-0.00912613		930.5	-0.00943597		930.5	-0.0198998		930.5	-0.0166308		930.5	-0.0170436		930.5	-0.0083082
	930.983	-0.0147232		930.983	-0.00994376		930.983	-0.013206		930.983	-0.0182976		930.983	-0.0152747		930.983	-0.0138364		930.983	-0.00964287		930.983	-0.0120762		930.983	-0.0208562		930.983	-0.0178758		930.983	-0.0192933		930.983	-0.0104074
	931.465	-0.0166972		931.465	-0.0112797		931.465	-0.0142508		931.465	-0.0200567		931.465	-0.0165303		931.465	-0.0163643		931.465	-0.0101174		931.465	-0.0145765		931.465	-0.0209227		931.465	-0.019139		931.465	-0.0210457		931.465	-0.012527
	931.947	-0.0181764		931.947	-0.0119745		931.947	-0.0149057		931.947	-0.021454		931.947	-0.0173654		931.947	-0.0181792		931.947	-0.0106097		931.947	-0.0165951		931.947	-0.020146		931.947	-0.0201761		931.947	-0.0221375		931.947	-0.0143713
	932.429	-0.0191783		932.429	-0.0119462		932.429	-0.0153371		932.429	-0.0224209		932.429	-0.0176052		932.429	-0.0191412		932.429	-0.0112036		932.429	-0.0179343		932.429	-0.018687		932.429	-0.0207714		932.429	-0.0225299		932.429	-0.0157709
	932.911	-0.0197912		932.911	-0.0113207		932.911	-0.0157064		932.911	-0.0228747		932.911	-0.0171475		932.911	-0.0192209		932.911	-0.0119457		932.911	-0.0185483		932.911	-0.0167619		932.911	-0.0207877		932.911	-0.0222741		932.911	-0.0166846
	933.393	-0.0200987		933.393	-0.0103798		933.393	-0.0160629		933.393	-0.0227065		933.393	-0.0159765		933.393	-0.0184802		933.393	-0.0128042		933.393	-0.0185192		933.393	-0.0146135		933.393	-0.0201811		933.393	-0.0214687		933.393	-0.0171692
	933.875	-0.0201126		933.875	-0.0094596		933.875	-0.0162987		933.875	-0.0218024		933.875	-0.0141585		933.875	-0.0170706		933.875	-0.0136409		933.875	-0.0180063		933.875	-0.0124707		933.875	-0.0190183		933.875	-0.0202162		933.875	-0.0173067
	934.357	-0.0197575		934.357	-0.0088377		934.357	-0.0161738		934.357	-0.0201153		934.357	-0.011846		934.357	-0.0152248		934.357	-0.0142264		934.357	-0.0171909		934.357	-0.0105279		934.357	-0.0174489		934.357	-0.0186024		934.357	-0.0171405
	934.84	-0.0189003		934.84	-0.00863158		934.84	-0.0154035		934.84	-0.0177254		934.84	-0.00924049		934.84	-0.0132186		934.84	-0.0142947		934.84	-0.0162139		934.84	-0.00890886		934.84	-0.0156586		934.84	-0.0166894		934.84	-0.0166323
	935.322	-0.0174184		935.322	-0.00877279		935.322	-0.0137738		935.322	-0.0148596		935.322	-0.00655727		935.322	-0.0113187		935.322	-0.0136215		935.322	-0.0151367		935.322	-0.00765456		935.322	-0.0138073		935.322	-0.0145307		935.322	-0.0156674
	935.804	-0.0152705		935.804	-0.00904391		935.804	-0.0112307		935.804	-0.0118523		935.804	-0.00398699		935.804	-0.00971588		935.804	-0.0120931		935.804	-0.0139421		935.804	-0.00672497		935.804	-0.0119888		935.804	-0.0121969		935.804	-0.0141066
	936.286	-0.0125443		936.286	-0.00919092		936.286	-0.00792651		936.286	-0.00906727		936.286	-0.00169557		936.286	-0.00850687		936.286	-0.00976383		936.286	-0.0125781		936.286	-0.00603992		936.286	-0.0102349		936.286	-0.00981135		936.286	-0.0118756
	936.768	-0.00946469		936.768	-0.00902171		936.768	-0.00422193		936.768	-0.00680959		936.768	0.000168486		936.768	-0.00769828		936.768	-0.00686673		936.768	-0.0110286		936.768	-0.00550458		936.768	-0.00856119		936.768	-0.0075635		936.768	-0.00903742
	937.25	-0.00636278		937.25	-0.00848649		937.25	-0.00064077		937.25	-0.00526234		937.25	0.0014557		937.25	-0.00724652		937.25	-0.00381781		937.25	-0.00938082		937.25	-0.00504781		937.25	-0.00701386		937.25	-0.00569613		937.25	-0.00585974
	937.732	-0.00361219		937.732	-0.00769815		937.732	0.00222244		937.732	-0.00444658		937.732	0.00202706		937.732	-0.00709901		937.732	-0.00114499		937.732	-0.00785402		937.732	-0.00463266		937.732	-0.00571496		937.732	-0.00445474		937.732	-0.00279963
	938.215	-0.00152378		938.215	-0.00689546		938.215	0.00386233		938.215	-0.0042256		938.215	0.00179117		938.215	-0.00721768		938.215	0.000634516		938.215	-0.00675312		938.215	-0.00426087		938.215	-0.00484071		938.215	-0.00400849		938.215	-0.000406166
	938.697	-0.000262342		938.697	-0.00633946		938.697	0.00401667		938.697	-0.00435664		938.697	0.00076179		938.697	-0.00757138		938.697	0.00118363		938.697	-0.00636121		938.697	-0.00395225		938.697	-0.00456007		938.697	-0.00437278		938.697	0.00085102
	939.179	0.00019096		939.179	-0.00621088		939.179	0.00276787		939.179	-0.00457181		939.179	-0.000925937		939.179	-0.00811335		939.179	0.000464025		939.179	-0.00680091		939.179	-0.00373109		939.179	-0.00495446		939.179	-0.00539474		939.179	0.000745858
	939.661	1.39163e-06		939.661	-0.00653061		939.661	0.000509071		939.661	-0.00465049		939.661	-0.00301718		939.661	-0.00873957		939.661	-0.00123705		939.661	-0.00795335		939.661	-0.00360801		939.661	-0.0059593		939.661	-0.00679226		939.661	-0.000621911
	940.143	-0.000599246		940.143	-0.00716156		940.143	-0.00217236		940.143	-0.00447124		940.143	-0.00519962		940.143	-0.00928444		940.143	-0.00339546		940.143	-0.00944929		940.143	-0.00359497		940.143	-0.0073585		940.143	-0.00824305		940.143	-0.00286609
	940.625	-0.00139145		940.625	-0.00785659		940.625	-0.0046596		940.625	-0.0040121		940.625	-0.00715628		940.625	-0.00953705		940.625	-0.00539284		940.625	-0.0107613		940.625	-0.0037028		940.625	-0.00883627		940.625	-0.00946375		940.625	-0.00542007
	941.107	-0.00221192		941.107	-0.00836102		941.107	-0.00645651		941.107	-0.00335117		941.107	-0.00864954		941.107	-0.00931554		941.107	-0.00669045		941.107	-0.0113554		941.107	-0.00396072		941.107	-0.0100555		941.107	-0.0102747		941.107	-0.00769626
	941.589	-0.00296957		941.589	-0.00850134		941.589	-0.00731146		941.589	-0.00263335		941.589	-0.00956564		941.589	-0.00855625		941.589	-0.00696857		941.589	-0.0108706		941.589	-0.00440177		941.589	-0.0107671		941.589	-0.0106241		941.589	-0.00922352
	942.072	-0.00362487		942.072	-0.00824244		942.072	-0.00725607		942.072	-0.00203351		942.072	-0.00994486		942.072	-0.00738033		942.072	-0.00621807		942.072	-0.00925813		942.072	-0.00504205		942.072	-0.0108785		942.072	-0.0105733		942.072	-0.00974954
	942.554	-0.00416952		942.554	-0.0076864		942.554	-0.00656279		942.554	-0.00170903		942.554	-0.00994333		942.554	-0.00608848		942.554	-0.00471936		942.554	-0.00681393		942.554	-0.00584565		942.554	-0.010478		942.554	-0.0102464		942.554	-0.00927532
	943.036	-0.00460459		943.036	-0.00701425		943.036	-0.00560429		943.036	-0.00175814		943.036	-0.00975958		943.036	-0.00507054		943.036	-0.00292998		943.036	-0.00407408		943.036	-0.00671237		943.036	-0.00977141		943.036	-0.00976165		943.036	-0.00799603
	943.518	-0.00493179		943.518	-0.00638704		943.518	-0.0046912		943.518	-0.00219939		943.518	-0.00954185		943.518	-0.00465623		943.518	-0.00130653		943.518	-0.00162612		943.518	-0.00748456		943.518	-0.00898286		943.518	-0.00918235		943.518	-0.0062004
	944	-0.00515447		944	-0.00589387		944	-0.00396236		944	-0.00296756		944	-0.00934018		944	-0.00499456		944	-0.000178589		944	7.7872e-05		944	-0.00799356		944	-0.0082687		944	-0.0085133		944	-0.00418173
	944.482	-0.00528617		944.482	-0.00552912		944.482	-0.00337662		944.482	-0.00393182		944.482	-0.00911043		944.482	-0.00599293		944.482	0.000315484		944.482	0.000824693		944.482	-0.00810951		944.482	-0.0076921		944.482	-0.00773829		944.482	-0.00219646
	944.964	-0.00535655		944.964	-0.00523072		944.964	-0.00278379		944.964	-0.00492986		944.964	-0.00877143		944.964	-0.00734104		944.964	0.000200076		944.964	0.000657645		944.964	-0.00781562		944.964	-0.00724554		944.964	-0.00687221		944.964	-0.000483885
	945.446	-0.00540779		945.446	-0.00492229		945.446	-0.00204894		945.446	-0.00581041		945.446	-0.00827423		945.446	-0.00861245		945.446	-0.000396533		945.446	-0.000192334		945.446	-0.00724228		945.446	-0.0069225		945.446	-0.00600486		945.446	0.000725114
	945.928	-0.00548662		945.928	-0.00456902		945.928	-0.00116069		945.928	-0.00648801		945.928	-0.00766498		945.928	-0.00942524		945.928	-0.00133639		945.928	-0.00141943		945.928	-0.00667006		945.928	-0.00677273		945.928	-0.00530588		945.928	0.00120527
	946.411	-0.00562699		946.411	-0.00418268		946.411	-0.000270687		946.411	-0.00698028		946.411	-0.00707958		946.411	-0.00958638		946.411	-0.00253305		946.411	-0.00276888		946.411	-0.00644218		946.411	-0.00691901		946.411	-0.00496979		946.411	0.000793124
	946.893	-0.0058447		946.893	-0.00381094		946.893	0.000364362		946.893	-0.00739805		946.893	-0.00669821		946.893	-0.00915647		946.893	-0.00397306		946.893	-0.00409952		946.893	-0.00684142		946.893	-0.00750573		946.893	-0.00514651		946.893	-0.000560994
	947.375	-0.00613043		947.375	-0.00348724		947.375	0.000504925		947.375	-0.00790399		947.375	-0.00665782		947.375	-0.0084034		947.375	-0.00568622		947.375	-0.00538701		947.375	-0.00796961		947.375	-0.00862574		947.375	-0.00586896		947.375	-0.00275406
	947.857	-0.00646307		947.857	-0.00321641		947.857	4.60919e-05		947.857	-0.0086435		947.857	-0.00700147		947.857	-0.00768191		947.857	-0.00768995		947.857	-0.00665534		947.857	-0.00971604		947.857	-0.0102349		947.857	-0.00704627		947.857	-0.00554826
	948.339	-0.00681265		948.339	-0.00297325		948.339	-0.000931458		948.339	-0.00968185		948.339	-0.00765674		948.339	-0.00729579		948.339	-0.00993242		948.339	-0.00790263		948.339	-0.0117748		948.339	-0.0121272		948.339	-0.00848172		948.339	-0.00860274
	948.821	-0.00714833		948.821	-0.00274715		948.821	-0.00218532		948.821	-0.0109804		948.821	-0.00848042		948.821	-0.00740763		948.821	-0.0122822		948.821	-0.00906617		948.821	-0.0137486		948.821	-0.0139611		948.821	-0.00993696		948.821	-0.0115534
	949.303	-0.00744131		949.303	-0.00258318		949.303	-0.00341673		949.303	-0.0123991		949.303	-0.00931288		949.303	-0.00800078		949.303	-0.0145473		949.303	-0.010037		949.303	-0.0152673		949.303	-0.0153572		949.303	-0.0111995		949.303	-0.0140865
	949.785	-0.00766479		949.785	-0.0026125		949.785	-0.00441568		949.785	-0.0137553		949.785	-0.0100602		949.785	-0.00892444		949.785	-0.0165432		949.785	-0.0107325		949.785	-0.0161301		949.785	-0.0160352		949.785	-0.0121525		949.785	-0.0160264
	950.268	-0.00779293		950.268	-0.00301965		950.268	-0.00515797		950.268	-0.0148858		950.268	-0.0107114		950.268	-0.00997177		950.268	-0.0181559		950.268	-0.0111571		950.268	-0.0163604		950.268	-0.0159173		950.268	-0.0127976		950.268	-0.017363
	950.75	-0.00780175		950.75	-0.00397963		950.75	-0.00582139		950.75	-0.0156996		950.75	-0.0113319		950.75	-0.0109836		950.75	-0.0193729		950.75	-0.0114193		950.75	-0.0161876		950.75	-0.0151577		950.75	-0.0132352		950.75	-0.0182224
	951.232	-0.0076629		951.232	-0.00554587		951.232	-0.00667593		951.232	-0.0161753		951.232	-0.0119848		951.232	-0.0118741		951.232	-0.0202431		951.232	-0.011686		951.232	-0.0159172		951.232	-0.0140594		951.232	-0.0135841		951.232	-0.0187625
	951.714	-0.00733668		951.714	-0.00760482		951.714	-0.00792199		951.714	-0.0163204		951.714	-0.0126696		951.714	-0.0126234		951.714	-0.020818		951.714	-0.0120824		951.714	-0.0158013		951.714	-0.0129474		951.714	-0.0139126		951.714	-0.0190882
	952.196	-0.00678913		952.196	-0.00985307		952.196	-0.00956275		952.196	-0.0161296		952.196	-0.0132836		952.196	-0.0132204		952.196	-0.0210883		952.196	-0.012617		952.196	-0.0159259		952.196	-0.012065		952.196	-0.0141933		952.196	-0.0191928
	952.678	-0.00599584		952.678	-0.0118613		952.678	-0.0113426		952.678	-0.0155619		952.678	-0.0136501		952.678	-0.0136141		952.678	-0.0209833		952.678	-0.0131452		952.678	-0.0161949		952.678	-0.0115087		952.678	-0.0143074		952.678	-0.0189935
	953.16	-0.00498339		953.16	-0.0131979		953.16	-0.0128288		953.16	-0.0145705		953.16	-0.0135948		953.16	-0.0137169		953.16	-0.020414		953.16	-0.0134209		953.16	-0.0163871		953.16	-0.0112592		953.16	-0.0141085		953.16	-0.0184189
	953.643	-0.00384408		953.643	-0.0135844		953.643	-0.0135705		953.643	-0.0131595		953.643	-0.0130416		953.643	-0.013447		953.643	-0.0193515		953.643	-0.0132103		953.643	-0.0162698		953.643	-0.0112318		953.643	-0.0135041		953.643	-0.017503
	954.125	-0.00275031		954.125	-0.0130161		954.125	-0.0133087		954.125	-0.0114394		954.125	-0.0120659		954.125	-0.0127919		954.125	-0.0178848		954.125	-0.0124213		954.125	-0.0157226		954.125	-0.0113561		954.125	-0.0125189		954.125	-0.0164326
	954.607	-0.00191955		954.607	-0.0117747		954.607	-0.012079		954.607	-0.00963302		954.607	-0.010876		954.607	-0.0118577		954.607	-0.0162175		954.607	-0.0111766		954.607	-0.0147943		954.607	-0.011606		954.607	-0.0113077		954.607	-0.0154887
	955.089	-0.00156402		955.089	-0.0103129		955.089	-0.0101916		955.089	-0.00802918		955.089	-0.00971101		955.089	-0.0108474		955.089	-0.0145959		955.089	-0.00978828		955.089	-0.0136761		955.089	-0.0119819		955.089	-0.0100997		955.089	-0.0149233
	955.571	-0.00182846		955.571	-0.00907944		955.571	-0.00808177		955.571	-0.00690701		955.571	-0.00874308		955.571	-0.0100085		955.571	-0.013219		955.571	-0.00864493		955.571	-0.0126227		955.571	-0.0124429		955.571	-0.00912266		955.571	-0.0148302
	956.053	-0.00273497		956.053	-0.00836778		956.053	-0.00614885		956.053	-0.00645119		956.053	-0.00801067		956.053	-0.00955604		956.053	-0.0121635		956.053	-0.00807969		956.053	-0.0118524		956.053	-0.0128652		956.053	-0.00853413		956.053	-0.0150681
	956.535	-0.0041413		956.535	-0.00823051		956.535	-0.00462417		956.535	-0.00669913		956.535	-0.00743115		956.535	-0.00960758		956.535	-0.0113771		956.535	-0.00825304		956.535	-0.0114868		956.535	-0.0130229		956.535	-0.00838679		956.535	-0.0152934
	957.017	-0.00573828		957.017	-0.00848168		957.017	-0.00353706		957.017	-0.00751003		957.017	-0.0068681		957.017	-0.0101424		957.017	-0.0107074		957.017	-0.00909511		957.017	-0.0115256		957.017	-0.0126709		957.017	-0.008627		957.017	-0.0150733
	957.5	-0.00711909		957.5	-0.00878867		957.5	-0.00275597		957.5	-0.00859377		957.5	-0.0062395		957.5	-0.0110074		957.5	-0.00998767		957.5	-0.0103192		957.5	-0.011877		957.5	-0.0116564		957.5	-0.00913668		957.5	-0.0140736
	957.982	-0.00790155		957.982	-0.0088215		957.982	-0.00211041		957.982	-0.0095985		957.982	-0.00559428		957.982	-0.0119654		957.982	-0.00912182		957.982	-0.0115413		957.982	-0.0124096		957.982	-0.0100424		957.982	-0.00978964		957.982	-0.0122276
	958.464	-0.00787334		958.464	-0.00840405		958.464	-0.00152262		958.464	-0.0102208		958.464	-0.0051362		958.464	-0.0127811		958.464	-0.0081488		958.464	-0.01243		958.464	-0.0130179		958.464	-0.00813751		958.464	-0.0105183		958.464	-0.00980027
	958.946	-0.00707636		958.946	-0.00756441		958.946	-0.00107195		958.946	-0.0102917		958.946	-0.00514812		958.946	-0.0132784		958.946	-0.00722997		958.946	-0.0128218		958.946	-0.0136528		958.946	-0.00642243		958.946	-0.0113314		958.946	-0.00731309
	959.428	-0.00579857		959.428	-0.00651011		959.428	-0.000953676		959.428	-0.00979091		959.428	-0.00587491		959.428	-0.013366		959.428	-0.00659582		959.428	-0.0127495		959.428	-0.0143158		959.428	-0.00537946		959.428	-0.0122959		959.428	-0.00536126
	959.91	-0.00449029		959.91	-0.00552277		959.91	-0.00137718		959.91	-0.00882172		959.91	-0.00740375		959.91	-0.0130194		959.91	-0.00645298		959.91	-0.0123925		959.91	-0.0150069		959.91	-0.00533756		959.91	-0.0134758		959.91	-0.0044043
	960.392	-0.00363555		960.392	-0.00485706		960.392	-0.00242746		960.392	-0.00757037		960.392	-0.00960223		960.392	-0.0122627		960.392	-0.00692083		960.392	-0.0119915		960.392	-0.0156986		960.392	-0.00632855		960.392	-0.0148729		960.392	-0.00462125
	960.874	-0.00359		960.874	-0.00464442		960.874	-0.00397677		960.874	-0.00625184		960.874	-0.0121141		960.874	-0.0111602		960.874	-0.00797593		960.874	-0.0117603		960.874	-0.0163118		960.874	-0.00807156		960.874	-0.0163794		960.874	-0.0058332
	961.357	-0.00444631		961.357	-0.00485663		961.357	-0.00567389		961.357	-0.00506907		961.357	-0.0144605		961.357	-0.00982071		961.357	-0.00945578		961.357	-0.0118106		961.357	-0.0167475		961.357	-0.0100449		961.357	-0.0177771		961.357	-0.00756965
	961.839	-0.00597293		961.839	-0.00531364		961.839	-0.00705569		961.839	-0.00416388		961.839	-0.0161799		961.839	-0.00838761		961.839	-0.0110918		961.839	-0.0121165		961.839	-0.0169228		961.839	-0.0116748		961.839	-0.0187778		961.839	-0.00923783
	962.321	-0.00769988		962.321	-0.00577019		962.321	-0.00770886		962.321	-0.00358734		962.321	-0.0169776		962.321	-0.00702645		962.321	-0.0125924		962.321	-0.012528		962.321	-0.0168155		962.321	-0.0125386		962.321	-0.0191069		962.321	-0.0103439
	962.803	-0.00908548		962.803	-0.005993		962.803	-0.007413		962.803	-0.00330422		962.803	-0.0167795		962.803	-0.00589034		962.803	-0.0136982		962.803	-0.0128348		962.803	-0.0164686		962.803	-0.012494		962.803	-0.0185676		962.803	-0.0106516
	963.285	-0.00969543		963.285	-0.00581976		963.285	-0.00617796		963.285	-0.00321055		963.285	-0.015698		963.285	-0.00509127		963.285	-0.0142144		963.285	-0.0128216		963.285	-0.0159669		963.285	-0.0116615		963.285	-0.017078		963.285	-0.0102051
	963.767	-0.00931732		963.767	-0.00517487		963.767	-0.00422462		963.767	-0.0031798		963.767	-0.0139502		963.767	-0.00468858		963.767	-0.0140091		963.767	-0.0123247		963.767	-0.0153863		963.767	-0.0103427		963.767	-0.0146981		963.767	-0.0092592
	964.249	-0.00800742		964.249	-0.00406367		964.249	-0.00188755		964.249	-0.00310246		964.249	-0.0117847		964.249	-0.00468458		964.249	-0.0130295		964.249	-0.0112681		964.249	-0.0147666		964.249	-0.00888136		964.249	-0.0116351		964.249	-0.00816252
	964.731	-0.0060724		964.731	-0.00256085		964.731	0.000458585		964.731	-0.00292379		964.731	-0.00942692		964.731	-0.00504644		964.731	-0.0113311		964.731	-0.00969274		964.731	-0.0140982		964.731	-0.00756561		964.731	-0.00825138		964.731	-0.00724046
	965.214	-0.00397615		965.214	-0.000804511		965.214	0.00249796		965.214	-0.00266931		965.214	-0.00706658		965.214	-0.00572115		965.214	-0.00910881		965.214	-0.00775931		965.214	-0.0133434		965.214	-0.00655375		965.214	-0.00501788		965.214	-0.00670441
	965.696	-0.00220038		965.696	0.00100977		965.696	0.00402279		965.696	-0.00243026		965.696	-0.00484533		965.696	-0.00665452		965.696	-0.00669423		965.696	-0.00571997		965.696	-0.0124707		965.696	-0.00587425		965.696	-0.00242285		965.696	-0.00662633
	966.178	-0.00109453		966.178	0.00264538		966.178	0.00495023		966.178	-0.00232742		966.178	-0.00285935		966.178	-0.00779869		966.178	-0.00449433		966.178	-0.00384562		966.178	-0.011487		966.178	-0.00547226		966.178	-0.000854282		966.178	-0.00695908
	966.66	-0.00078804		966.66	0.00385882		966.66	0.00528644		966.66	-0.00244565		966.66	-0.00115643		966.66	-0.0090845		966.66	-0.00288831		966.66	-0.00235395		966.66	-0.0104396		966.66	-0.00527488		966.66	-0.000506655		966.66	-0.00759264
	967.142	-0.00118759		967.142	0.00442114		967.142	0.0050889		967.142	-0.00278719		967.142	0.000247681		967.142	-0.010395		967.142	-0.00213164		967.142	-0.00136034		967.142	-0.00941263		967.142	-0.00524133		967.142	-0.00136443		967.142	-0.00840418
	967.624	-0.00204746		967.624	0.004162		967.624	0.00443878		967.624	-0.00325022		967.624	0.00137066		967.624	-0.0115374		967.624	-0.00227963		967.624	-0.000866981		967.624	-0.0084823		967.624	-0.00537854		967.624	-0.00322499		967.624	-0.00925966
	968.106	-0.00304005		968.106	0.00301087		968.106	0.00345521		968.106	-0.00365316		968.106	0.00223953		968.106	-0.0122546		968.106	-0.00318618		968.106	-0.000785295		968.106	-0.00769304		968.106	-0.00570757		968.106	-0.0057355		968.106	-0.0100116
	968.588	-0.00385603		968.588	0.00105315		968.588	0.00229615		968.588	-0.00380657		968.588	0.0028807		968.588	-0.0122938		968.588	-0.00452702		968.588	-0.000981678		968.588	-0.00703081		968.588	-0.00625165		968.588	-0.00846199		968.588	-0.0104867
	969.071	-0.00427754		969.071	-0.00147388		969.071	0.00115476		969.071	-0.00360643		969.071	0.00328871		969.071	-0.0115153		969.071	-0.00591508		969.071	-0.00133841		969.071	-0.00643105		969.071	-0.00699994		969.071	-0.0109786		969.071	-0.010519
	969.553	-0.00424427		969.553	-0.00422248		969.553	0.000194441		969.553	-0.00311967		969.553	0.00342255		969.553	-0.00997679		969.553	-0.00703786		969.553	-0.00180985		969.553	-0.00580923		969.553	-0.0079118		969.553	-0.0129657		969.553	-0.00999919
	970.035	-0.00386342		970.035	-0.0068546		970.035	-0.000509865		970.035	-0.00258872		970.035	0.00320022		970.035	-0.00795218		970.035	-0.00776722		970.035	-0.00244542		970.035	-0.00510974		970.035	-0.00892399		970.035	-0.0142847		970.035	-0.00892889
	970.517	-0.00335561		970.517	-0.00912311		970.517	-0.00101824		970.517	-0.00236037		970.517	0.00254021		970.517	-0.0058312		970.517	-0.00817903		970.517	-0.00336176		970.517	-0.00433876		970.517	-0.00995985		970.517	-0.0149721		970.517	-0.00743124
	970.999	-0.00296822		970.999	-0.0109083		970.999	-0.00148977		970.999	-0.00275663		970.999	0.00141175		970.999	-0.00397868		970.999	-0.00846706		970.999	-0.00466082		970.999	-0.00358511		970.999	-0.0109111		970.999	-0.0151744		970.999	-0.0057215
	971.481	-0.00289107		971.481	-0.0121781		971.481	-0.00211608		971.481	-0.00393964		971.481	-0.00010065		971.481	-0.00259646		971.481	-0.00880409		971.481	-0.00634387		971.481	-0.00297984		971.481	-0.01163		971.481	-0.0150613		971.481	-0.00403423
	971.963	-0.00319204		971.963	-0.01294		971.963	-0.00301886		971.963	-0.00582541		971.963	-0.00176174		971.963	-0.00165537		971.963	-0.00923166		971.963	-0.00824569		971.963	-0.00265548		971.963	-0.0119212		971.963	-0.0147568		971.963	-0.0025705
	972.445	-0.00379281		972.445	-0.0131973		972.445	-0.00418114		972.445	-0.00806694		972.445	-0.00319312		972.445	-0.000917473		972.445	-0.00961062		972.445	-0.0100385		972.445	-0.00268373		972.445	-0.0116011		972.445	-0.0143122		972.445	-0.00143475
	972.928	-0.00451161		972.928	-0.0129479		972.928	-0.00543001		972.928	-0.0101538		972.928	-0.00398245		972.928	-6.40434e-05		972.928	-0.00967628		972.928	-0.0113278		972.928	-0.00304515		972.928	-0.0105826		972.928	-0.0137254		972.928	-0.000625981
	973.41	-0.00514242		973.41	-0.0122044		973.41	-0.00651246		973.41	-0.0115897		973.41	-0.00382329		973.41	0.0011256		973.41	-0.00917421		973.41	-0.0118139		973.41	-0.00363253		973.41	-0.00896829		973.41	-0.0129725		973.41	-5.72519e-05
	973.892	-0.00557485		973.892	-0.0110423		973.892	-0.00723254		973.892	-0.0120863		973.892	-0.00267277		973.892	0.00260108		973.892	-0.00802635		973.892	-0.0114471		973.892	-0.00432075		973.892	-0.00707698		973.892	-0.0120635		973.892	0.000344665
	974.374	-0.00585556		974.374	-0.00960991		974.374	-0.00756685		974.374	-0.0116509		974.374	-0.000793233		974.374	0.00400627		974.374	-0.00640395		974.374	-0.0104862		974.374	-0.00504614		974.374	-0.00538053		974.374	-0.0110635		974.374	0.000575887
	974.856	-0.00618377		974.856	-0.00813397		974.856	-0.00769851		974.856	-0.0105665		974.856	0.00128644		974.856	0.00476069		974.856	-0.00471149		974.856	-0.00943989		974.856	-0.00587014		974.856	-0.00436923		974.856	-0.0101049		974.856	0.000506517
	975.338	-0.00683924		975.338	-0.00689781		975.338	-0.00797199		975.338	-0.00927396		975.338	0.00289424		975.338	0.00425126		975.338	-0.00345989		975.338	-0.00891762		975.338	-0.00695709		975.338	-0.00442208		975.338	-0.00937148		975.338	-6.4706e-05
	975.82	-0.00807208		975.82	-0.0062148		975.82	-0.00875945		975.82	-0.00825606		975.82	0.00336681		975.82	0.00205852		975.82	-0.00312306		975.82	-0.00945205		975.82	-0.00852071		975.82	-0.00567327		975.82	-0.00907454		975.82	-0.00133206
	976.302	-0.0100023		976.302	-0.00636901		976.302	-0.0103284		976.302	-0.00791655		976.302	0.0022343		976.302	-0.00184321		976.302	-0.0039639		976.302	-0.0113184		976.302	-0.0107085		976.302	-0.00797232		976.302	-0.00942439		976.302	-0.00334979
	976.784	-0.0125489		976.784	-0.00755969		976.784	-0.0126987		976.784	-0.00849559		976.784	-0.000619794		976.784	-0.00701311		976.784	-0.00592583		976.784	-0.0144069		976.784	-0.013507		976.784	-0.0109063		976.784	-0.0105737		976.784	-0.00595695
	977.267	-0.0154523		977.267	-0.00984416		977.267	-0.0156198		977.267	-0.0100309		977.267	-0.00488946		977.267	-0.0126577		977.267	-0.00864136		977.267	-0.0182437		977.267	-0.0166819		977.267	-0.013948		977.267	-0.0125817		977.267	-0.00878578
	977.749	-0.0183635		977.749	-0.0131273		977.749	-0.018639		977.749	-0.0123822		977.749	-0.00993342		977.749	-0.0178975		977.749	-0.0115653		977.749	-0.0221389		977.749	-0.0198275		977.749	-0.016628		977.749	-0.0153863		977.749	-0.0113788
	978.231	-0.0209679		978.231	-0.01718		978.231	-0.0212679		978.231	-0.0153014		978.231	-0.0149759		978.231	-0.0220397		978.231	-0.014165		978.231	-0.0254349		978.231	-0.0224693		978.231	-0.0186789		978.231	-0.0188026		978.231	-0.0133506
	978.713	-0.0230438		978.713	-0.0216696		978.713	-0.0231122		978.713	-0.0184791		978.713	-0.0192921		978.713	-0.0247155		978.713	-0.0160558		978.713	-0.0276639		978.713	-0.0241898		978.713	-0.0200312		978.713	-0.0225308		978.713	-0.0145028
	979.195	-0.0244632		979.195	-0.0261555		979.195	-0.0239485		979.195	-0.0215486		979.195	-0.0223228		979.195	-0.0258703		979.195	-0.0170271		979.195	-0.0286342		979.195	-0.0246936		979.195	-0.020737		979.195	-0.0261512		979.195	-0.0148517
	979.677	-0.0251503		979.677	-0.0300968		979.677	-0.0237284		979.677	-0.0240863		979.677	-0.0237503		979.677	-0.0256807		979.677	-0.0170151		979.677	-0.0284198		979.677	-0.0238729		979.677	-0.0208349		979.677	-0.0291484		979.677	-0.014599
	980.159	-0.0250399		980.159	-0.0328927		980.159	-0.0225521		980.159	-0.0256204		980.159	-0.0235275		980.159	-0.0244303		980.159	-0.0160276		980.159	-0.0273018		980.159	-0.0218181		980.159	-0.0202783		980.159	-0.0309687		980.159	-0.0140228
	980.641	-0.0240771		980.641	-0.0340038		980.641	-0.0206103		980.641	-0.0257354		980.641	-0.0219055		980.641	-0.0224301		980.641	-0.0141069		980.641	-0.0256605		980.641	-0.018809		980.641	-0.0189302		980.641	-0.0311521		980.641	-0.0133645
	981.124	-0.0222544		981.124	-0.0331086		981.124	-0.0181284		981.124	-0.0242021		981.124	-0.0193738		981.124	-0.019949		981.124	-0.0113125		981.124	-0.0238497		981.124	-0.0152301		981.124	-0.0166611		981.124	-0.0294735		981.124	-0.0127313
	981.606	-0.0196616		981.606	-0.0302199		981.606	-0.0153119		981.606	-0.0210782		981.606	-0.0165236		981.606	-0.0172099		981.606	-0.00774392		981.606	-0.0220844		981.606	-0.0114575		981.606	-0.0134751		981.606	-0.0260228		981.606	-0.0120706
	982.088	-0.0165119		982.088	-0.0256581		982.088	-0.0123459		982.088	-0.0167185		982.088	-0.0138728		982.088	-0.0144115		982.088	-0.00358199		982.088	-0.0204171		982.088	-0.00776979		982.088	-0.00959526		982.088	-0.0211657		982.088	-0.0112448
	982.57	-0.0131492		982.57	-0.0199949		982.57	-0.00942686		982.57	-0.0117139		982.57	-0.0117493		982.57	-0.011792		982.57	0.000869545		982.57	-0.0187959		982.57	-0.00435408		982.57	-0.00548361		982.57	-0.0154646		982.57	-0.0101456
	983.052	-0.010024		983.052	-0.0139431		983.052	-0.00682815		983.052	-0.00680195		983.052	-0.0102575		983.052	-0.00965862		983.052	0.00517155		983.052	-0.0171728		983.052	-0.00135704		983.052	-0.00179299		983.052	-0.00959432		983.052	-0.00878666
	983.534	-0.00761732		983.534	-0.00827524		983.534	-0.00489713		983.534	-0.00275318		983.534	-0.00932271		983.534	-0.00836128		983.534	0.00878275		983.534	-0.0155945		983.534	0.00104916		983.534	0.000773474		983.534	-0.0042717		983.534	-0.00735424
	984.016	-0.00632722		984.016	-0.00370964		984.016	-0.00400324		984.016	-0.000216709		984.016	-0.00875321		984.016	-0.00818681		984.016	0.0111939		984.016	-0.0142334		984.016	0.00265385		984.016	0.00163915		984.016	-0.000168123		984.016	-0.00616682
	984.499	-0.00631458		984.499	-0.000760853		984.499	-0.00438062		984.499	0.00046429		984.499	-0.00834149		984.499	-0.00921804		984.499	0.0121192		984.499	-0.0133392		984.499	0.00327957		984.499	0.000574095		984.499	0.00221995		984.499	-0.00555722
	984.981	-0.00740782		984.981	0.000403097		984.981	-0.00599136		984.981	-0.000612448		984.981	-0.0079241		984.981	-0.0112202		984.981	0.0116559		984.981	-0.0131152		984.981	0.0028796		984.981	-0.00218812		984.981	0.00271679		984.981	-0.00571395
	985.463	-0.00911828		985.463	-1.05034e-05		985.463	-0.00846222		985.463	-0.00292267		985.463	-0.00743994		985.463	-0.0136556		985.463	0.0102827		985.463	-0.0135951		985.463	0.00161144		985.463	-0.00600744		985.463	0.00151385		985.463	-0.00656504
	985.945	-0.0107907		985.945	-0.00150849		985.945	-0.0111766		985.945	-0.00568079		985.945	-0.0069164		985.945	-0.0158197		985.945	0.0086986		985.945	-0.0145846		985.945	-0.00017998		985.945	-0.0100478		985.945	-0.0008936		985.945	-0.00777087
	986.427	-0.0117688		986.427	-0.00347235		986.427	-0.0134179		986.427	-0.0080523		986.427	-0.00643611		986.427	-0.0170145		986.427	0.00758095		986.427	-0.0156763		986.427	-0.00205761		986.427	-0.0134809		986.427	-0.00384152		986.427	-0.00880958
	986.909	-0.0115686		986.909	-0.00530565		986.909	-0.0145662		986.909	-0.00934184		986.909	-0.00608112		986.909	-0.0167341		986.909	0.00737131		986.909	-0.0163584		986.909	-0.00360279		986.909	-0.0156688		986.909	-0.00665057		986.909	-0.00912052
	987.391	-0.00998715		987.391	-0.00653867		987.391	-0.014238		987.391	-0.00913006		987.391	-0.00590106		987.391	-0.0147974		987.391	0.00813558		987.391	-0.0161599		987.391	-0.00454046		987.391	-0.0162412		987.391	-0.00873707		987.391	-0.00827231
	987.873	-0.00718679		987.873	-0.00689321		987.873	-0.0124172		987.873	-0.00736684		987.873	-0.00588566		987.873	-0.0114486		987.873	0.00954223		987.873	-0.0148092		987.873	-0.00481758		987.873	-0.0151709		987.873	-0.00972086		987.873	-0.00609939
	988.356	-0.00367281		988.356	-0.00632287		988.356	-0.00946541		988.356	-0.00439984		988.356	-0.00599633		988.356	-0.00732781		988.356	0.0109782		988.356	-0.0123308		988.356	-0.00462384		988.356	-0.0127768		988.356	-0.00950077		988.356	-0.00277546
	988.838	-0.000154808		988.838	-0.00498221		988.838	-0.00600264		988.838	-0.000854084		988.838	-0.00618403		988.838	-0.00326446		988.838	0.0117994		988.838	-0.00903362		988.838	-0.00429122		988.838	-0.00963522		988.838	-0.00825317		988.838	0.00124932
	989.32	0.00266291		989.32	-0.00317566		989.32	-0.00270211		989.32	0.00255848		989.32	-0.00644166		989.32	-8.18403e-06		989.32	0.0115622		989.32	-0.00537464		989.32	-0.00415567		989.32	-0.00642608		989.32	-0.00634808		989.32	0.00541237
	989.802	0.00427077		989.802	-0.00123058		989.802	-9.03471e-05		989.802	0.00524837		989.802	-0.00678584		989.802	0.00202606		989.802	0.0101774		989.802	-0.00177692		989.802	-0.00440072		989.802	-0.00374623		989.802	-0.00418642		989.802	0.00923301
	990.284	0.00444494		990.284	0.000552397		990.284	0.00152977		990.284	0.00686632		990.284	-0.00724326		990.284	0.00281689		990.284	0.00788313		990.284	0.00149403		990.284	-0.00500084		990.284	-0.00200547		990.284	-0.00208887		990.284	0.0124111
	990.766	0.00326548		990.766	0.00196704		990.766	0.00205832		990.766	0.00733808		990.766	-0.00778929		990.766	0.00268785		990.766	0.00516384		990.766	0.00436112		990.766	-0.00570721		990.766	-0.0013793		990.766	-0.000220584		990.766	0.0148588
	991.248	0.00108374		991.248	0.00290188		991.248	0.00153486		991.248	0.00682771		991.248	-0.00831223		991.248	0.00215121		991.248	0.00260058		991.248	0.00688305		991.248	-0.00614412		991.248	-0.0017885		991.248	0.00140623		991.248	0.0166332
	991.73	-0.0015459		991.73	0.00336588		991.73	7.53865e-05		991.73	0.00569025		991.73	-0.00860949		991.73	0.00171495		991.73	0.000738257		991.73	0.00916488		991.73	-0.00591701		991.73	-0.00293185		991.73	0.00288827		991.73	0.0178722
	992.212	-0.00399549		992.212	0.00346863		992.212	-0.00214757		992.212	0.00437116		992.212	-0.00845371		992.212	0.00169327		992.212	-6.59649e-05		992.212	0.0112831		992.212	-0.00477438		992.212	-0.00434473		992.212	0.00435871		992.212	0.0187092
	992.695	-0.00575299		992.695	0.0033808		992.695	-0.00493481		992.695	0.00327192		992.695	-0.00769255		992.695	0.00207766		992.695	0.000249471		992.695	0.0132354		992.695	-0.00270909		992.695	-0.00554894		992.695	0.00590368		992.695	0.0191964
	993.177	-0.00656334		993.177	0.00325082		993.177	-0.00805933		993.177	0.00264164		993.177	-0.00634269		993.177	0.00255731		993.177	0.00145955		993.177	0.014963		993.177	2.51495e-05		993.177	-0.00619736		993.177	0.00750344		993.177	0.0192599
	993.659	-0.00646049		993.659	0.00314578		993.659	-0.0112919		993.659	0.00252752		993.659	-0.00460525		993.659	0.00267515		993.659	0.00316157		993.659	0.0163802		993.659	0.00301207		993.659	-0.00616809		993.659	0.00903718		993.659	0.0187028
	994.141	-0.00566663		994.141	0.00301897		994.141	-0.0143844		994.141	0.0028207		994.141	-0.00282788		994.141	0.00205169		994.141	0.00490988		994.141	0.0174381		994.141	0.00577774		994.141	-0.00553268		994.141	0.01032		994.141	0.0172614
	994.623	-0.00445717		994.623	0.00274837		994.623	-0.0170609		994.623	0.00333703		994.623	-0.00138736		994.623	0.000571076		994.623	0.00635479		994.623	0.0181514		994.623	0.00791255		994.623	-0.00448705		994.623	0.0111766		994.623	0.01473
	995.105	-0.00304772		995.105	0.00219031		995.105	-0.0190219		995.105	0.00387483		995.105	-0.000586639		995.105	-0.00151222		995.105	0.00728127		995.105	0.0185947		995.105	0.00912028		995.105	-0.00324775		995.105	0.0115155		995.105	0.0110685
	995.587	-0.00154817		995.587	0.00125647		995.587	-0.0200017		995.587	0.00427338		995.587	-0.000526512		995.587	-0.00359944		995.587	0.00765715		995.587	0.0188888		995.587	0.00928984		995.587	-0.00198618		995.587	0.0113894		995.587	0.00652536
	996.069	1.75614e-05		996.069	-4.17137e-05		996.069	-0.0198502		996.069	0.00442248		996.069	-0.00104733		996.069	-0.00492059		996.069	0.0076175		996.069	0.019133		996.069	0.00852215		996.069	-0.000796706		996.069	0.0109961		996.069	0.00162594
	996.552	0.00162242		996.552	-0.00159413		996.552	-0.0186068		996.552	0.00426053		996.552	-0.00175309		996.552	-0.00482141		996.552	0.00741104		996.552	0.0193489		996.552	0.0071226		996.552	0.000300365		996.552	0.0106191		996.552	-0.00296312
	997.034	0.00315175		997.034	-0.00325837		997.034	-0.0165014		997.034	0.00376085		997.034	-0.00216659		997.034	-0.00302515		997.034	0.00729714		997.034	0.0194352		997.034	0.00549571		997.034	0.00130276		997.034	0.0105039		997.034	-0.00667286
	997.516	0.00434081		997.516	-0.00492121		997.516	-0.0138908		997.516	0.00289771		997.516	-0.00191598		997.516	0.000249041		997.516	0.00744209		997.516	0.0191685		997.516	0.00402085		997.516	0.00216067		997.516	0.0107443		997.516	-0.00921379
	997.998	0.00480823		997.998	-0.00654895		997.998	-0.0111574		997.998	0.00164573		997.998	-0.000877695		997.998	0.00432933		997.998	0.00784598		997.998	0.0182648		997.998	0.00293834		997.998	0.00274613		997.998	0.0112307		997.998	-0.0106302
	998.48	0.00415795		998.48	-0.00815653		998.48	-0.0086664		998.48	6.09671e-06		998.48	0.000788411		998.48	0.00824843		998.48	0.00833971		998.48	0.0164795		998.48	0.00233459		998.48	0.00286145		998.48	0.011673		998.48	-0.011205
	998.962	0.00214938		998.962	-0.00975278		998.962	-0.00672797		998.962	-0.00195151		998.962	0.00266601		998.962	0.0109688		998.962	0.00860224		998.962	0.0137282		998.962	0.00214605		998.962	0.002331		998.962	0.011699		998.962	-0.0113288
	999.444	-0.00115289		999.444	-0.0112796		999.444	-0.00558767		999.444	-0.00405875		999.444	0.00420462		999.444	0.0116581		999.444	0.00825542		999.444	0.0101836		999.444	0.00222144		999.444	0.00108852		999.444	0.0109739		999.444	-0.0113392
	999.927	-0.00532571		999.927	-0.0126001		999.927	-0.0053821		999.927	-0.00606051		999.927	0.00488164		999.927	0.00996968		999.927	0.00697213		999.927	0.00628442		999.927	0.00238287		999.927	-0.000735483		999.927	0.00933395		999.927	-0.0113944
	1000.41	-0.00971306		1000.41	-0.0135257		1000.41	-0.00609909		1000.41	-0.00768487		1000.41	0.00440644		1000.41	0.00618604		1000.41	0.00461348		1000.41	0.00261894		1000.41	0.00250875		1000.41	-0.00281928		1000.41	0.00686507		1000.41	-0.0114151
	1000.89	-0.0136752		1000.89	-0.0139102		1000.89	-0.00755946		1000.89	-0.00872642		1000.89	0.00279779		1000.89	0.00108786		1000.89	0.00127382		1000.89	-0.000271548		1000.89	0.00257368		1000.89	-0.00475996		1000.89	0.0038509		1000.89	-0.0111457
	1001.37	-0.0168167		1001.37	-0.013697		1001.37	-0.00945393		1001.37	-0.00911234		1001.37	0.000347317		1001.37	-0.00434181		1001.37	-0.00273622		1001.37	-0.00206605		1001.37	0.00264828		1001.37	-0.00622013		1001.37	0.000668928		1001.37	-0.0102906
	1001.86	-0.0190425		1001.86	-0.0129454		1001.86	-0.0113829		1001.86	-0.00888876		1001.86	-0.00251694		1001.86	-0.00920046		1001.86	-0.0069598		1001.86	-0.00272012		1001.86	0.00283193		1001.86	-0.00701135		1001.86	-0.00232821		1001.86	-0.00865935
	1002.34	-0.0204837		1002.34	-0.0117902		1002.34	-0.0129271		1002.34	-0.00818092		1002.34	-0.00534061		1002.34	-0.0128046		1002.34	-0.0108554		1002.34	-0.00242881		1002.34	0.00319531		1002.34	-0.00713066		1002.34	-0.00486253		1002.34	-0.00626389
	1002.82	-0.0213187		1002.82	-0.0103923		1002.82	-0.0136974		1002.82	-0.0071494		1002.82	-0.00772006		1002.82	-0.014726		1002.82	-0.0138606		1002.82	-0.001549		1002.82	0.00370874		1002.82	-0.00669922		1002.82	-0.00673022		1002.82	-0.00335811
	1003.3	-0.0216324		1003.3	-0.0088698		1003.3	-0.0134389		1003.3	-0.00594472		1003.3	-0.00932643		1003.3	-0.0148078		1003.3	-0.0154781		1003.3	-0.000484977		1003.3	0.00422001		1003.3	-0.00590858		1003.3	-0.00780341		1003.3	-0.000386469
	1003.78	-0.0213263		1003.78	-0.00725154		1003.78	-0.0120984		1003.78	-0.00468229		1003.78	-0.00993627		1003.78	-0.0131712		1003.78	-0.0153964		1003.78	0.000435334		1003.78	0.00448929		1003.78	-0.00491807		1003.78	-0.00803243		1003.78	0.00217019
	1004.27	-0.0201806		1004.27	-0.00547572		1004.27	-0.00986768		1004.27	-0.00343543		1004.27	-0.00945523		1004.27	-0.0101849		1004.27	-0.0135959		1004.27	0.00105398		1004.27	0.00428442		1004.27	-0.00380289		1004.27	-0.0074743		1004.27	0.00397958
	1004.75	-0.0179841		1004.75	-0.00345745		1004.75	-0.0071143		1004.75	-0.00224353		1004.75	-0.0079294		1004.75	-0.00637335		1004.75	-0.0103662		1004.75	0.0014056		1004.75	0.00347264		1004.75	-0.00253855		1004.75	-0.00629012		1004.75	0.00498981
	1005.23	-0.0146827		1005.23	-0.00115629		1005.23	-0.00425175		1005.23	-0.00113904		1005.23	-0.00551551		1005.23	-0.00226479		1005.23	-0.00620066		1005.23	0.00165032		1005.23	0.00208995		1005.23	-0.00105057		1005.23	-0.00471451		1005.23	0.00539999
	1005.71	-0.0104618		1005.71	0.00133826		1005.71	-0.00162731		1005.71	-0.000171965		1005.71	-0.00247685		1005.71	0.00170724		1005.71	-0.00168755		1005.71	0.00196292		1005.71	0.000316446		1005.71	0.000715721		1005.71	-0.0030238		1005.71	0.00552971
	1006.19	-0.00575512		1006.19	0.00380527		1006.19	0.000525194		1006.19	0.000584248		1006.19	0.000837873		1006.19	0.00524982		1006.19	0.00260644		1006.19	0.0024536		1006.19	-0.00153606		1006.19	0.00272096		1006.19	-0.00148894		1006.19	0.0056744
	1006.68	-0.00118075		1006.68	0.00592218		1006.68	0.002076		1006.68	0.00102661		1006.68	0.00398681		1006.68	0.00820449		1006.68	0.0061655		1006.68	0.0031086		1006.68	-0.00310523		1006.68	0.00481178		1006.68	-0.000342074		1006.68	0.00599813
	1007.16	0.00259761		1007.16	0.00739086		1007.16	0.00295869		1007.16	0.00106375		1007.16	0.00650544		1007.16	0.0105216		1007.16	0.00861146		1007.16	0.00379621		1007.16	-0.00403567		1007.16	0.0067291		1007.16	0.000271519		1007.16	0.00652451
	1007.64	0.00507573		1007.64	0.00806807		1007.64	0.00314828		1007.64	0.000640655		1007.64	0.00801389		1007.64	0.0122393		1007.64	0.00976214		1007.64	0.00431404		1007.64	-0.00408901		1007.64	0.00818268		1007.64	0.000332229		1007.64	0.00716972
	1008.12	0.0060789		1008.12	0.00805119		1008.12	0.00263828		1008.12	-0.000241049		1008.12	0.00836339		1008.12	0.0134257		1008.12	0.0096801		1008.12	0.00446214		1008.12	-0.00322055		1008.12	0.0089378		1008.12	-4.7876e-05		1008.12	0.00781707
	1008.61	0.00577096		1008.61	0.00762053		1008.61	0.00144047		1008.61	-0.00153883		1008.61	0.0076665		1008.61	0.0141076		1008.61	0.00861991		1008.61	0.00411078		1008.61	-0.0016143		1008.61	0.00887165		1008.61	-0.000695059		1008.61	0.00836576
	1009.09	0.00451718		1009.09	0.00709154		1009.09	-0.000404577		1009.09	-0.00319944		1009.09	0.00623044		1009.09	0.014216		1009.09	0.00691571		1009.09	0.00320386		1009.09	0.000362439		1009.09	0.00795456		1009.09	-0.0014582		1009.09	0.00873839
	1009.57	0.00269885		1009.57	0.00663828		1009.57	-0.00279285		1009.57	-0.00517415		1009.57	0.004389		1009.57	0.0135674		1009.57	0.00487055		1009.57	0.0017574		1009.57	0.00221585		1009.57	0.00622059		1009.57	-0.00227926		1009.57	0.00883381
	1010.05	0.000609033		1010.05	0.0062058		1010.05	-0.00552208		1010.05	-0.00740411		1010.05	0.00239523		1010.05	0.011939		1010.05	0.00272036		1010.05	-0.000172362		1010.05	0.00342255		1010.05	0.00373418		1010.05	-0.00320375		1010.05	0.00849988
	1010.53	-0.00154527		1010.53	0.00552239		1010.53	-0.00825655		1010.53	-0.009781		1010.53	0.000352855		1010.53	0.00919449		1010.53	0.000638631		1010.53	-0.00248677		1010.53	0.00351199		1010.53	0.000650809		1010.53	-0.00433679		1010.53	0.00752677
	1011.01	-0.00359838		1011.01	0.00422854		1011.01	-0.0105621		1011.01	-0.012116		1011.01	-0.00175887		1011.01	0.00544052		1011.01	-0.00121392		1011.01	-0.00502521		1011.01	0.00221402		1011.01	-0.00272953		1011.01	-0.00576038		1011.01	0.00574376
	1011.5	-0.00538957		1011.5	0.00206874		1011.5	-0.0120115		1011.5	-0.0141517		1011.5	-0.00401903		1011.5	0.00109483		1011.5	-0.00267349		1011.5	-0.0075646		1011.5	-0.000421625		1011.5	-0.00592547		1011.5	-0.00745622		1011.5	0.00313463
	1011.98	-0.00679898		1011.98	-0.000935657		1011.98	-0.0123479		1011.98	-0.0156335		1011.98	-0.00646715		1011.98	-0.00319605		1011.98	-0.00359004		1011.98	-0.00984961		1011.98	-0.00398114		1011.98	-0.00835303		1011.98	-0.00927201		1011.98	-5.89746e-05
	1012.46	-0.00783143		1012.46	-0.00447406		1012.46	-0.0116047		1012.46	-0.0164		1012.46	-0.00904777		1012.46	-0.00680378		1012.46	-0.0038824		1012.46	-0.011651		1012.46	-0.00781776		1012.46	-0.00948505		1012.46	-0.010975		1012.46	-0.00338707
	1012.94	-0.00866527		1012.94	-0.00804651		1012.94	-0.0101128		1012.94	-0.0164338		1012.94	-0.0115919		1012.94	-0.00933561		1012.94	-0.00356776		1012.94	-0.0128244		1012.94	-0.0112552		1012.94	-0.00901207		1012.94	-0.0123253		1012.94	-0.00631938
	1013.43	-0.0096243		1013.43	-0.0111708		1013.43	-0.00839333		1013.43	-0.0158595		1013.43	-0.0138765		1013.43	-0.010756		1013.43	-0.00279367		1013.43	-0.0133263		1013.43	-0.0138042		1013.43	-0.00694011		1013.43	-0.013174		1013.43	-0.0084372
	1013.91	-0.0110781		1013.91	-0.0135107		1013.91	-0.00702534		1013.91	-0.0149012		1013.91	-0.0156787		1013.91	-0.0113482		1013.91	-0.00181186		1013.91	-0.0132121		1013.91	-0.0152364		1013.91	-0.0036296		1013.91	-0.0134912		1013.91	-0.00954862
	1014.39	-0.0132333		1014.39	-0.0149362		1014.39	-0.00646379		1014.39	-0.0138203		1014.39	-0.0168494		1014.39	-0.0115813		1014.39	-0.000953775		1014.39	-0.0126231		1014.39	-0.0156162		1014.39	0.000252091		1014.39	-0.0133463		1014.39	-0.00976007
	1014.87	-0.0159933		1014.87	-0.015528		1014.87	-0.00692546		1014.87	-0.0128598		1014.87	-0.0173652		1014.87	-0.0119397		1014.87	-0.000548486		1014.87	-0.0117722		1014.87	-0.0152578		1014.87	0.00381402		1014.87	-0.0128849		1014.87	-0.00946456
	1015.35	-0.0188752		1015.35	-0.0155088		1015.35	-0.00828678		1015.35	-0.0121713		1015.35	-0.0173456		1015.35	-0.0127344		1015.35	-0.000824883		1015.35	-0.0108919		1015.35	-0.0146146		1015.35	0.00620509		1015.35	-0.0122435		1015.35	-0.00922161
	1015.84	-0.021173		1015.84	-0.0151361		1015.84	-0.0101499		1015.84	-0.0117777		1015.84	-0.0170084		1015.84	-0.0139918		1015.84	-0.00182984		1015.84	-0.0101876		1015.84	-0.0141206		1015.84	0.00689312		1015.84	-0.0114894		1015.84	-0.00956158
	1016.32	-0.0222105		1016.32	-0.0145908		1016.32	-0.0119757		1016.32	-0.0115607		1016.32	-0.0165713		1016.32	-0.0154708		1016.32	-0.00341465		1016.32	-0.00976574		1016.32	-0.0140182		1016.32	0.00587117		1016.32	-0.010579		1016.32	-0.0107619
	1016.8	-0.0216205		1016.8	-0.0139195		1016.8	-0.013303		1016.8	-0.0113248		1016.8	-0.0161554		1016.8	-0.0168058		1016.8	-0.00531956		1016.8	-0.00962783		1016.8	-0.014282		1016.8	0.00359738		1016.8	-0.00938938		1016.8	-0.0127663
	1017.28	-0.0194523		1017.28	-0.0130675		1017.28	-0.0138567		1017.28	-0.0108575		1017.28	-0.01575		1017.28	-0.0176644		1017.28	-0.00726793		1017.28	-0.00968995		1017.28	-0.0146694		1017.28	0.00079422		1017.28	-0.00778724		1017.28	-0.0152232
	1017.76	-0.0161651		1017.76	-0.0119577		1017.76	-0.0136083		1017.76	-0.00998964		1017.76	-0.0152315		1017.76	-0.0178676		1017.76	-0.00904219		1017.76	-0.00982777		1017.76	-0.0148209		1017.76	-0.00181407		1017.76	-0.00572775		1017.76	-0.0176116
	1018.25	-0.0125032		1018.25	-0.0106068		1018.25	-0.0127501		1018.25	-0.0086474		1018.25	-0.0144504		1018.25	-0.0174416		1018.25	-0.0105333		1018.25	-0.00992896		1018.25	-0.0144183		1018.25	-0.00367994		1018.25	-0.00333371		1018.25	-0.0194231
	1018.73	-0.00927902		1018.73	-0.00918235		1018.73	-0.0116562		1018.73	-0.00686941		1018.73	-0.0133253		1018.73	-0.0166034		1018.73	-0.0117308		1018.73	-0.00992513		1018.73	-0.0132985		1018.73	-0.00457066		1018.73	-0.000919985		1018.73	-0.0203065
	1019.21	-0.00709011		1019.21	-0.00799196		1019.21	-0.01077		1019.21	-0.00480289		1019.21	-0.0119209		1019.21	-0.0156856		1019.21	-0.0126941		1019.21	-0.00979525		1019.21	-0.0115354		1019.21	-0.00460577		1019.21	0.00107942		1019.21	-0.0201805
	1019.69	-0.00610981		1019.69	-0.0073602		1019.69	-0.0104676		1019.69	-0.00264915		1019.69	-0.0104329		1019.69	-0.015004		1019.69	-0.0135031		1019.69	-0.00955066		1019.69	-0.00938847		1019.69	-0.00418422		1019.69	0.00227317		1019.69	-0.0192457
	1020.18	-0.00609004		1020.18	-0.00751003		1020.18	-0.0109501		1020.18	-0.000602555		1020.18	-0.00912506		1020.18	-0.0147647		1020.18	-0.0142195		1020.18	-0.00920477		1020.18	-0.00719995		1020.18	-0.00381544		1020.18	0.00246077		1020.18	-0.0178837
	1020.66	-0.00659308		1020.66	-0.00845218		1020.66	-0.0122213		1020.66	0.00118417		1020.66	-0.00822436		1020.66	-0.0150309		1020.66	-0.014859		1020.66	-0.00875617		1020.66	-0.00525999		1020.66	-0.00394578		1020.66	0.00168997		1020.66	-0.0165036
	1021.14	-0.00724336		1021.14	-0.0100043		1021.14	-0.014115		1021.14	0.00259374		1021.14	-0.00784689		1021.14	-0.0157691		1021.14	-0.0154096		1021.14	-0.00819279		1021.14	-0.00377054		1021.14	-0.0048222		1021.14	0.000201999		1021.14	-0.0154397
	1021.62	-0.00790133		1021.62	-0.0118301		1021.62	-0.0163672		1021.62	0.00351964		1021.62	-0.00797368		1021.62	-0.0169183		1021.62	-0.0158551		1021.62	-0.00752722		1021.62	-0.00284111		1021.62	-0.00648204		1021.62	-0.00167705		1021.62	-0.0149151
	1022.1	-0.00865874		1022.1	-0.0135365		1022.1	-0.0186537		1022.1	0.00383585		1022.1	-0.00847061		1022.1	-0.0184151		1022.1	-0.0162215		1022.1	-0.00683604		1022.1	-0.00256151		1022.1	-0.00875029		1022.1	-0.00363138		1022.1	-0.015078
	1022.59	-0.00972313		1022.59	-0.0147497		1022.59	-0.0206482		1022.59	0.00343808		1022.59	-0.0091164		1022.59	-0.020185		1022.59	-0.0165708		1022.59	-0.00629237		1022.59	-0.00299794		1022.59	-0.0113184		1022.59	-0.00543365		1022.59	-0.016022
	1023.07	-0.011256		1023.07	-0.0152345		1023.07	-0.0220775		1023.07	0.00229532		1023.07	-0.00968244		1023.07	-0.0221059		1023.07	-0.0169846		1023.07	-0.00612971		1023.07	-0.00418606		1023.07	-0.0138305		1023.07	-0.0069911		1023.07	-0.0177857
	1023.55	-0.0132458		1023.55	-0.0149317		1023.55	-0.0227882		1023.55	0.000514777		1023.55	-0.00998099		1023.55	-0.0239647		1023.55	-0.0174783		1023.55	-0.00656641		1023.55	-0.00604727		1023.55	-0.0159935		1023.55	-0.00832468		1023.55	-0.0203124
	1024.03	-0.0155267		1024.03	-0.0139573		1024.03	-0.0227589		1024.03	-0.00166134		1024.03	-0.0099364		1024.03	-0.0254715		1024.03	-0.0179393		1024.03	-0.0077047		1024.03	-0.00836183		1024.03	-0.0176537		1024.03	-0.00952402		1024.03	-0.023418
	1024.52	-0.0178842		1024.52	-0.0125162		1024.52	-0.0220904		1024.52	-0.00391196		1024.52	-0.00957964		1024.52	-0.0262934		1024.52	-0.018104		1024.52	-0.00948719		1024.52	-0.0107701		1024.52	-0.0188164		1024.52	-0.010654		1024.52	-0.0267903
	1025	-0.0201702		1025	-0.0108187		1025	-0.0209443		1025	-0.00590269		1025	-0.00904037		1025	-0.0261275		1025	-0.017607		1025	-0.011696		1025	-0.0128486		1025	-0.0195857		1025	-0.0117032		1025	-0.0300039
	1025.48	-0.0223396		1025.48	-0.00904005		1025.48	-0.0195296		1025.48	-0.00735515		1025.48	-0.00851093		1025.48	-0.024776		1025.48	-0.0160729		1025.48	-0.013994		1025.48	-0.0141767		1025.48	-0.0201168		1025.48	-0.0125688		1025.48	-0.0325639
	1025.96	-0.0244026		1025.96	-0.00731895		1025.96	-0.018069		1025.96	-0.00810219		1025.96	-0.00822508		1025.96	-0.0222438		1025.96	-0.0132862		1025.96	-0.0159962		1025.96	-0.0144648		1025.96	-0.0205457		1025.96	-0.0131048		1025.96	-0.033999
	1026.44	-0.0263341		1026.44	-0.00577408		1026.44	-0.0167979		1026.44	-0.00814437		1026.44	-0.00840002		1026.44	-0.0188198		1026.44	-0.00934518		1026.44	-0.0173658		1026.44	-0.0136599		1026.44	-0.0209574		1026.44	-0.0132129		1026.44	-0.0339981
	1026.93	-0.0279923		1026.93	-0.00451216		1026.93	-0.0158999		1026.93	-0.00767087		1026.93	-0.00918362		1026.93	-0.0150565		1026.93	-0.00473853		1026.93	-0.0179266		1026.93	-0.0120279		1026.93	-0.0213564		1026.93	-0.0129358		1026.93	-0.0325449
	1027.41	-0.0291332		1027.41	-0.00361117		1027.41	-0.0154503		1027.41	-0.00701223		1027.41	-0.0105866		1027.41	-0.0116164		1027.41	-0.000229823		1027.41	-0.0177156		1027.41	-0.010074		1027.41	-0.0216565		1027.41	-0.0124747		1027.41	-0.0299464
	1027.89	-0.0295104		1027.89	-0.0031121		1027.89	-0.0153704		1027.89	-0.0065184		1027.89	-0.0124821		1027.89	-0.00904014		1027.89	0.00340658		1027.89	-0.0169514		1027.89	-0.00836053		1027.89	-0.0217047		1027.89	-0.0121378		1027.89	-0.0267062
	1028.37	-0.0289904		1028.37	-0.00298039		1028.37	-0.0154421		1028.37	-0.00642723		1028.37	-0.0146384		1028.37	-0.00756324		1028.37	0.00567813		1028.37	-0.0159128		1028.37	-0.00727487		1028.37	-0.0213092		1028.37	-0.0121959		1028.37	-0.0233036
	1028.85	-0.0276329		1028.85	-0.00312678		1028.85	-0.0153683		1028.85	-0.00678956		1028.85	-0.0167803		1028.85	-0.00710752		1028.85	0.00649973		1028.85	-0.0148246		1028.85	-0.00693228		1028.85	-0.0202993		1028.85	-0.0127699		1028.85	-0.0200315
	1029.34	-0.0257295		1029.34	-0.00341137		1029.34	-0.0148782		1029.34	-0.00747515		1029.34	-0.0186363		1029.34	-0.00737391		1029.34	0.0061651		1029.34	-0.0138004		1029.34	-0.00717991		1029.34	-0.0186026		1029.34	-0.013777		1029.34	-0.0169673
	1029.82	-0.0237346		1029.82	-0.00366269		1029.82	-0.0138046		1029.82	-0.00821821		1029.82	-0.0199741		1029.82	-0.00796753		1029.82	0.005214		1029.82	-0.0128448		1029.82	-0.00770613		1029.82	-0.016299		1029.82	-0.0149253		1029.82	-0.0140538
	1030.3	-0.022148		1030.3	-0.00372324		1030.3	-0.012197		1030.3	-0.00871863		1030.3	-0.0206433		1030.3	-0.0085272		1030.3	0.00424708		1030.3	-0.0119067		1030.3	-0.00818212		1030.3	-0.0136949		1030.3	-0.0158152		1030.3	-0.0112465
	1030.78	-0.0213081		1030.78	-0.00351087		1030.78	-0.0103466		1030.78	-0.0087624		1030.78	-0.0206301		1030.78	-0.00881708		1030.78	0.00369966		1030.78	-0.0109379		1030.78	-0.00840967		1030.78	-0.0112702		1030.78	-0.0161003		1030.78	-0.00863123
	1031.27	-0.0212274		1031.27	-0.00305897		1031.27	-0.00872282		1031.27	-0.00830843		1031.27	-0.0200391		1031.27	-0.00876549		1031.27	0.00369621		1031.27	-0.00993197		1031.27	-0.00838709		1031.27	-0.00952483		1031.27	-0.0156459		1031.27	-0.00644776
	1031.75	-0.0215916		1031.75	-0.00254531		1031.75	-0.00779951		1031.75	-0.00749759		1031.75	-0.0190561		1031.75	-0.00844578		1031.75	0.00401229		1031.75	-0.00892499		1031.75	-0.00827469		1031.75	-0.00877487		1031.75	-0.0146073		1031.75	-0.0050015
	1032.23	-0.0219272		1032.23	-0.00221185		1032.23	-0.00789156		1032.23	-0.00656726		1032.23	-0.0178456		1032.23	-0.00799756		1032.23	0.00421456		1032.23	-0.00796012		1032.23	-0.00825336		1032.23	-0.00903492		1032.23	-0.0133464		1032.23	-0.00452492
	1032.71	-0.0218057		1032.71	-0.00229304		1032.71	-0.0090493		1032.71	-0.00573517		1032.71	-0.0164884		1032.71	-0.00756389		1032.71	0.00385678		1032.71	-0.00704304		1032.71	-0.00840155		1032.71	-0.0100353		1032.71	-0.0122751		1032.71	-0.00505197
	1033.19	-0.0210098		1033.19	-0.0029181		1033.19	-0.0110731		1033.19	-0.00512064		1033.19	-0.0149822		1033.19	-0.0072679		1033.19	0.00264884		1033.19	-0.00613667		1033.19	-0.00861372		1033.19	-0.0113541		1033.19	-0.0116989		1033.19	-0.00636248
	1033.67	-0.0195749		1033.67	-0.00403836		1033.67	-0.0135507		1033.67	-0.0047108		1033.67	-0.0132921		1033.67	-0.00721804		1033.67	0.000566033		1033.67	-0.00517569		1033.67	-0.00862164		1033.67	-0.0125575		1033.67	-0.0116945		1033.67	-0.00800758
	1034.16	-0.0177447		1034.16	-0.00538502		1034.16	-0.0159655		1034.16	-0.00437504		1034.16	-0.0114112		1034.16	-0.0075069		1034.16	-0.00212571		1034.16	-0.00411465		1034.16	-0.00807634		1034.16	-0.0133542		1034.16	-0.012063		1034.16	-0.00940027
	1034.64	-0.0158512		1034.64	-0.00652552		1034.64	-0.0178431		1034.64	-0.00394896		1034.64	-0.00942323		1034.64	-0.00820313		1034.64	-0.00496933		1034.64	-0.00297628		1034.64	-0.00672004		1034.64	-0.0137062		1034.64	-0.0123975		1034.64	-0.0100097
	1035.12	-0.0141283		1035.12	-0.00700336		1035.12	-0.0188926		1035.12	-0.00331434		1035.12	-0.00750013		1035.12	-0.00929796		1035.12	-0.00749521		1035.12	-0.00187059		1035.12	-0.00449685		1035.12	-0.0138247		1035.12	-0.0122406		1035.12	-0.009561
	1035.6	-0.0126052		1035.6	-0.00652637		1035.6	-0.0190687		1035.6	-0.00247333		1035.6	-0.00585101		1035.6	-0.0106762		1035.6	-0.00941613		1035.6	-0.000966901		1035.6	-0.00160479		1035.6	-0.0140437		1035.6	-0.0112813		1035.6	-0.00815562
	1036.09	-0.0111351		1036.09	-0.005069		1036.09	-0.0185152		1036.09	-0.00156376		1036.09	-0.00466187		1036.09	-0.0121121		1036.09	-0.0107008		1036.09	-0.000441221		1036.09	0.00158803		1036.09	-0.0146208		1036.09	-0.00946774		1036.09	-0.00621399
	1036.57	-0.00951313		1036.57	-0.00287544		1036.57	-0.0174089		1036.57	-0.000797533		1036.57	-0.00405314		1036.57	-0.0133008		1036.57	-0.0115098		1036.57	-0.000420797		1036.57	0.00464945		1036.57	-0.0155688		1036.57	-0.00700075		1036.57	-0.00431711
	1037.05	-0.00765059		1037.05	-0.000383423		1037.05	-0.0158578		1037.05	-0.00039597		1037.05	-0.00408136		1037.05	-0.0139301		1037.05	-0.0120522		1037.05	-0.00094108		1037.05	0.00718636		1037.05	-0.0166185		1037.05	-0.00424601		1037.05	-0.00301172
	1037.53	-0.00566199		1037.53	0.00187545		1037.53	-0.0138465		1037.53	-0.000509303		1037.53	-0.00474053		1037.53	-0.0137553		1037.53	-0.0124774		1037.53	-0.00193393		1037.53	0.00888389		1037.53	-0.0172633		1037.53	-0.00162308		1037.53	-0.0026724
	1038.01	-0.00386973		1038.01	0.00342585		1038.01	-0.0112941		1038.01	-0.00114714		1038.01	-0.00595159		1038.01	-0.012708		1038.01	-0.0127856		1038.01	-0.00322272		1038.01	0.00955612		1038.01	-0.0169388		1038.01	0.000515441		1038.01	-0.00337918
	1038.5	-0.00268014		1038.5	0.00398343		1038.5	-0.00815959		1038.5	-0.00215528		1038.5	-0.00756457		1038.5	-0.0109775		1038.5	-0.0128582		1038.5	-0.00456289		1038.5	0.00916004		1038.5	-0.0152456		1038.5	0.00199088		1038.5	-0.00491194
	1038.98	-0.00238087		1038.98	0.00356888		1038.98	-0.00454669		1038.98	-0.0032391		1038.98	-0.00934245		1038.98	-0.0089716		1038.98	-0.0125197		1038.98	-0.00568959		1038.98	0.00782348		1038.98	-0.0121217		1038.98	0.00285882		1038.98	-0.00682782
	1039.46	-0.00299069		1039.46	0.00245917		1039.46	-0.000727941		1039.46	-0.00405149		1039.46	-0.0109971		1039.46	-0.00718336		1039.46	-0.0116395		1039.46	-0.00637936		1039.46	0.00579423		1039.46	-0.0078682		1039.46	0.00334945		1039.46	-0.00863058
	1039.94	-0.0042532		1039.94	0.00106411		1039.94	0.0028868		1039.94	-0.00429441		1039.94	-0.0122246		1039.94	-0.00599728		1039.94	-0.0102014		1039.94	-0.00648736		1039.94	0.00338217		1039.94	-0.00302998		1039.94	0.00374728		1039.94	-0.00994388
	1040.42	-0.00573331		1040.42	-0.000240553		1040.42	0.00586455		1040.42	-0.00376716		1040.42	-0.0127323		1040.42	-0.00554914		1040.42	-0.00830476		1040.42	-0.00592946		1040.42	0.000892421		1040.42	0.00181583		1040.42	0.00427612		1040.42	-0.0105614
	1040.91	-0.00696551		1040.91	-0.00119036		1040.91	0.00783768		1040.91	-0.00238762		1040.91	-0.0122649		1040.91	-0.00569757		1040.91	-0.0061303		1040.91	-0.00467534		1040.91	-0.00137418		1040.91	0.00618718		1040.91	0.00504515		1040.91	-0.0104279
	1041.39	-0.00757304		1041.39	-0.00166187		1041.39	0.00861136		1041.39	-0.000213563		1041.39	-0.0106725		1041.39	-0.00609547		1041.39	-0.00391485		1041.39	-0.00276506		1041.39	-0.00314224		1041.39	0.00978132		1041.39	0.00605179		1041.39	-0.0095973
	1041.87	-0.00734994		1041.87	-0.00165018		1041.87	0.00822104		1041.87	0.00255951		1041.87	-0.00798071		1041.87	-0.0063232		1041.87	-0.00189464		1041.87	-0.000359521		1041.87	-0.00418321		1041.87	0.0124648		1041.87	0.00723865		1041.87	-0.00818918
	1042.35	-0.00629753		1042.35	-0.00125		1042.35	0.00695169		1042.35	0.00560737		1042.35	-0.00446327		1042.35	-0.00606462		1042.35	-0.00025764		1042.35	0.00223503		1042.35	-0.00438632		1042.35	0.0142435		1042.35	0.00853972		1042.35	-0.00637629
	1042.84	-0.004624		1042.84	-0.00063048		1042.84	0.00521125		1042.84	0.00854188		1042.84	-0.000613441		1042.84	-0.00523072		1042.84	0.000902514		1042.84	0.0045878		1042.84	-0.00380759		1042.84	0.0151957		1042.84	0.00990357		1042.84	-0.00437517
	1043.32	-0.00266444		1043.32	-2.50155e-05		1043.32	0.00336928		1043.32	0.0110097		1043.32	0.00296793		1043.32	-0.00398597		1043.32	0.00159552		1043.32	0.00624392		1043.32	-0.00267622		1043.32	0.0153865		1043.32	0.011274		1043.32	-0.00243013
	1043.8	-0.000796342		1043.8	0.000307858		1043.8	0.00161291		1043.8	0.0127655		1043.8	0.00572906		1043.8	-0.00263344		1043.8	0.00191399		1043.8	0.00684033		1043.8	-0.00131267		1043.8	0.0148251		1043.8	0.0125429		1043.8	-0.000785758
	1044.28	0.000637536		1044.28	9.368e-05		1044.28	-7.59034e-05		1044.28	0.013688		1044.28	0.00726045		1044.28	-0.00148253		1044.28	0.00199177		1044.28	0.00618883		1044.28	-6.22213e-05		1044.28	0.013469		1044.28	0.0135025		1044.28	0.000323907
	1044.76	0.00137422		1044.76	-0.000890855		1044.76	-0.00184278		1044.76	0.013769		1044.76	0.00735803		1044.76	-0.000710905		1044.76	0.00198415		1044.76	0.00433489		1044.76	0.000800394		1044.76	0.0112757		1044.76	0.0138579		1044.76	0.000720866
	1045.25	0.00129588		1045.25	-0.00273085		1045.25	-0.00380454		1045.25	0.0130982		1045.25	0.00603929		1045.25	-0.000302905		1045.25	0.00204727		1045.25	0.00157726		1045.25	0.00111065		1045.25	0.00832029		1045.25	0.0133079		1045.25	0.000314357
	1045.73	0.000480079		1045.73	-0.00526752		1045.73	-0.00593224		1045.73	0.0118548		1045.73	0.00358061		1045.73	-5.54297e-05		1045.73	0.00232407		1045.73	-0.0015555		1045.73	0.000861677		1045.73	0.00484903		1045.73	0.0116885		1045.73	-0.000832589
	1046.21	-0.000761018		1046.21	-0.00804798		1046.21	-0.00797397		1046.21	0.0102853		1046.21	0.000476596		1046.21	0.000336474		1046.21	0.00290375		1046.21	-0.004429		1046.21	0.000209027		1046.21	0.0012907		1046.21	0.00912184		1046.21	-0.00248601
	1046.69	-0.00196025		1046.69	-0.0104169		1046.69	-0.00953734		1046.69	0.00864874		1046.69	-0.00265989		1046.69	0.00114446		1046.69	0.00378511		1046.69	-0.00649614		1046.69	-0.000572477		1046.69	-0.00186119		1046.69	0.00604604		1046.69	-0.00430077
	1047.17	-0.00264925		1047.17	-0.0117267		1047.17	-0.0102294		1047.17	0.00713934		1047.17	-0.00528761		1047.17	0.0024694		1047.17	0.00485319		1047.17	-0.00748511		1047.17	-0.00118072		1047.17	-0.00420463		1047.17	0.00306258		1047.17	-0.00593518
	1047.66	-0.00254804		1047.66	-0.0115461		1047.66	-0.00984384		1047.66	0.00583711		1047.66	-0.00706749		1047.66	0.00419994		1047.66	0.00590092		1047.66	-0.0074572		1047.66	-0.00137365		1047.66	-0.00554279		1047.66	0.000714128		1047.66	-0.00717887
	1048.14	-0.00164015		1048.14	-0.00977588		1048.14	-0.00841497		1048.14	0.00472712		1048.14	-0.00790282		1048.14	0.00604494		1048.14	0.00668182		1048.14	-0.00671417		1048.14	-0.00103477		1048.14	-0.00587278		1048.14	-0.000696019		1048.14	-0.00798038
	1048.62	-0.000166732		1048.62	-0.00665433		1048.62	-0.00622761		1048.62	0.00375744		1048.62	-0.00787445		1048.62	0.00763773		1048.62	0.00698803		1048.62	-0.00564465		1048.62	-0.000151098		1048.62	-0.00532716		1048.62	-0.00116109		1048.62	-0.00839294
	1049.1	0.001479		1049.1	-0.0027111		1049.1	-0.00374022		1049.1	0.00290211		1049.1	-0.00717639		1049.1	0.00864198		1049.1	0.00670137		1049.1	-0.00457958		1049.1	0.00118041		1049.1	-0.00409715		1049.1	-0.00091777		1049.1	-0.00850112
	1049.59	0.00289974		1049.59	0.00136289		1049.59	-0.00146933		1049.59	0.00221109		1049.59	-0.00601796		1049.59	0.00886769		1049.59	0.00585199		1049.59	-0.00368276		1049.59	0.00279578		1049.59	-0.00239306		1049.59	-0.000325519		1049.59	-0.00833154
	1050.07	0.0038743		1050.07	0.00491682		1050.07	0.000174751		1050.07	0.00180228		1050.07	-0.00456738		1050.07	0.00834177		1050.07	0.00461358		1050.07	-0.00292435		1050.07	0.00449227		1050.07	-0.000413449		1050.07	0.000297082		1050.07	-0.00781695
	1050.55	0.00444859		1050.55	0.00756341		1050.55	0.00103259		1050.55	0.00181865		1050.55	-0.00290105		1050.55	0.00731422		1050.55	0.00324495		1050.55	-0.00214364		1050.55	0.00608952		1050.55	0.00167703		1050.55	0.000820112		1050.55	-0.00682482
	1051.03	0.00489651		1051.03	0.00927647		1051.03	0.00123969		1051.03	0.00235058		1051.03	-0.00100859		1051.03	0.00614507		1051.03	0.00196551		1051.03	-0.00116667		1051.03	0.00746221		1051.03	0.00376599		1051.03	0.00134487		1051.03	-0.00523661
	1051.51	0.0055637		1051.51	0.0103392		1051.51	0.00113872		1051.51	0.00339593		1051.51	0.00117008		1051.51	0.0051909		1051.51	0.000888901		1051.51	8.0954e-05		1051.51	0.0085603		1051.51	0.00580625		1051.51	0.00214389		1051.51	-0.00302376
	1052	0.0066967		1052	0.0111332		1052	0.00114134		1052	0.00484756		1052	0.00366864		1052	0.00470642		1052	-4.87068e-06		1052	0.0015193		1052	0.00938341		1052	0.00782199		1052	0.00350147		1052	-0.000307408
	1052.48	0.00832863		1052.48	0.0119487		1052.48	0.00159282		1052.48	0.00651321		1052.48	0.00642332		1052.48	0.00481047		1052.48	-0.000805536		1052.48	0.0029307		1052.48	0.00996259		1052.48	0.00987269		1052.48	0.00556182		1052.48	0.00264548
	1052.96	0.0102709		1052.96	0.0128575		1052.96	0.00270505		1052.96	0.00815213		1052.96	0.00924279		1052.96	0.00550732		1052.96	-0.00160456		1052.96	0.00404145		1052.96	0.0103369		1052.96	0.0120462		1052.96	0.00823603		1052.96	0.00545253
	1053.44	0.0121896		1053.44	0.0137219		1053.44	0.00450322		1053.44	0.00953207		1053.44	0.011845		1053.44	0.00669821		1053.44	-0.00241455		1053.44	0.00462279		1053.44	0.0105637		1053.44	0.0143982		1053.44	0.0111788		1053.44	0.0077325
	1053.92	0.0137481		1053.92	0.0142806		1053.92	0.00684346		1053.92	0.0104884		1053.92	0.013951		1053.92	0.00821567		1053.92	-0.0031575		1053.92	0.00459195		1053.92	0.0107136		1053.92	0.0169156		1053.92	0.0138879		1053.92	0.00922664
	1054.41	0.0147471		1054.41	0.0143296		1054.41	0.00945313		1054.41	0.0109722		1054.41	0.0154276		1054.41	0.00986439		1054.41	-0.00369916		1054.41	0.00404489		1054.41	0.01088		1054.41	0.0194875		1054.41	0.0159033		1054.41	0.00991374
	1054.89	0.0151561		1054.89	0.013817		1054.89	0.0120099		1054.89	0.0110408		1054.89	0.0163333		1054.89	0.0114523		1054.89	-0.00393636		1054.89	0.00318693		1054.89	0.0111314		1054.89	0.0218998		1054.89	0.0169703		1054.89	0.00997429
	1055.37	0.01504		1055.37	0.0128869		1055.37	0.0141981		1055.37	0.0107997		1055.37	0.0168802		1055.37	0.0128082		1055.37	-0.00385137		1055.37	0.00221392		1055.37	0.0115		1055.37	0.0238651		1055.37	0.0171019		1055.37	0.0096692
	1055.85	0.0144329		1055.85	0.011776		1055.85	0.0157262		1055.85	0.0103383		1055.85	0.0172869		1055.85	0.013771		1055.85	-0.00352875		1055.85	0.00122307		1055.85	0.0119307		1055.85	0.0250746		1055.85	0.0164817		1055.85	0.00918356
	1056.34	0.013278		1056.34	0.0107153		1056.34	0.0163228		1056.34	0.00969962		1056.34	0.0176623		1056.34	0.014175		1056.34	-0.00310355		1056.34	0.000207502		1056.34	0.0122974		1056.34	0.0252499		1056.34	0.0153454		1056.34	0.00855884
	1056.82	0.0114762		1056.82	0.00984127		1056.82	0.015787		1056.82	0.00888416		1056.82	0.01793		1056.82	0.013868		1056.82	-0.00269954		1056.82	-0.000895551		1056.82	0.0124171		1056.82	0.0242429		1056.82	0.0138904		1056.82	0.00771071
	1057.3	0.00901154		1057.3	0.00914847		1057.3	0.0140494		1057.3	0.00788785		1057.3	0.0178476		1057.3	0.0127573		1057.3	-0.00235981		1057.3	-0.00210744		1057.3	0.0121124		1057.3	0.0221145		1057.3	0.0122457		1057.3	0.00653673
	1057.78	0.00609154		1057.78	0.00849761		1057.78	0.0112638		1057.78	0.00673395		1057.78	0.0171046		1057.78	0.010872		1057.78	-0.00202143		1057.78	-0.00334962		1057.78	0.0112742		1057.78	0.0191796		1057.78	0.0105008		1057.78	0.00504344
	1058.26	0.00314935		1058.26	0.00767027		1058.26	0.00780108		1058.26	0.00548286		1058.26	0.0154772		1058.26	0.00838285		1058.26	-0.00154784		1058.26	-0.00444674		1058.26	0.00991208		1058.26	0.0159142		1058.26	0.00873734		1058.26	0.00341066
	1058.75	0.000722525		1058.75	0.00644693		1058.75	0.00414651		1058.75	0.00421553		1058.75	0.0129277		1058.75	0.00555894		1058.75	-0.000817938		1058.75	-0.00519877		1058.75	0.0081343		1058.75	0.0128052		1058.75	0.0070617		1058.75	0.00194937
	1059.23	-0.000773157		1059.23	0.00468458		1059.23	0.000726209		1059.23	0.00299061		1059.23	0.00960649		1059.23	0.00268358		1059.23	0.000176574		1059.23	-0.00549536		1059.23	0.00608095		1059.23	0.0101801		1059.23	0.00559018		1059.23	0.000963114
	1059.71	-0.00120028		1059.71	0.00234725		1059.71	-0.00219811		1059.71	0.00182827		1059.71	0.00577599		1059.71	-1.87866e-05		1059.71	0.00128734		1059.71	-0.00537311		1059.71	0.00384317		1059.71	0.00816357		1059.71	0.00442187		1059.71	0.000603459
	1060.19	-0.000761018		1060.19	-0.000473194		1060.19	-0.00456436		1060.19	0.000712734		1060.19	0.00172706		1060.19	-0.00240512		1060.19	0.0022373		1060.19	-0.00502122		1060.19	0.00145387		1060.19	0.00671123		1060.19	0.00360192		1060.19	0.000799498
	1060.67	7.32655e-05		1060.67	-0.00355787		1060.67	-0.00645354		1060.67	-0.000374154		1060.67	-0.00226832		1060.67	-0.00440486		1060.67	0.00270829		1060.67	-0.00470861		1060.67	-0.00108617		1060.67	0.00572328		1060.67	0.00311458		1060.67	0.00125434
	1061.16	0.000736531		1061.16	-0.00656498		1061.16	-0.00800403		1061.16	-0.00141424		1061.16	-0.00596296		1061.16	-0.00599283		1061.16	0.00249849		1061.16	-0.00464911		1061.16	-0.0037168		1061.16	0.0051297		1061.16	0.00288657		1061.16	0.00156243
	1061.64	0.00081895		1061.64	-0.00909781		1061.64	-0.00931599		1061.64	-0.0023315		1061.64	-0.0091383		1061.64	-0.00718004		1061.64	0.00164999		1061.64	-0.00487269		1061.64	-0.00625664		1061.64	0.00493539		1061.64	0.0028258		1061.64	0.00138409
	1062.12	0.000271552		1062.12	-0.0107889		1062.12	-0.0103865		1062.12	-0.00299767		1062.12	-0.0115919		1062.12	-0.00797999		1062.12	0.000490395		1062.12	-0.00515123		1062.12	-0.00837509		1062.12	0.0052029		1062.12	0.00287499		1062.12	0.000638332
	1062.6	-0.000557487		1062.6	-0.0114013		1062.6	-0.0110915		1062.6	-0.00326337		1062.6	-0.0131445		1062.6	-0.00839316		1062.6	-0.000480012		1062.6	-0.00504958		1062.6	-0.00965006		1062.6	0.00598147		1062.6	0.00305167		1062.6	-0.000429536
	1063.09	-0.00110015		1063.09	-0.0108552		1063.09	-0.0112464		1063.09	-0.00300813		1063.09	-0.0136415		1063.09	-0.00838095		1063.09	-0.00078761		1063.09	-0.00410536		1063.09	-0.00967012		1063.09	0.00722096		1063.09	0.00343828		1063.09	-0.00134012
	1063.57	-0.000838409		1063.57	-0.00922803		1063.57	-0.0106906		1063.57	-0.00218063		1063.57	-0.0129889		1063.57	-0.00787383		1063.57	-0.000172528		1063.57	-0.00201035		1063.57	-0.00816314		1063.57	0.00873146		1063.57	0.00412109		1063.57	-0.00158542
	1064.05	0.000461703		1064.05	-0.00672324		1064.05	-0.00939265		1064.05	-0.000826669		1064.05	-0.0112045		1064.05	-0.00679664		1064.05	0.00130937		1064.05	0.00122776		1064.05	-0.00510103		1064.05	0.0101643		1064.05	0.00510862		1064.05	-0.000826305
	1064.53	0.00262794		1064.53	-0.00366279		1064.53	-0.00751755		1064.53	0.00088495		1064.53	-0.00852094		1064.53	-0.00513993		1064.53	0.00326284		1064.53	0.00519757		1064.53	-0.000815822		1064.53	0.0110887		1064.53	0.00625948		1064.53	0.000943289
	1065.01	0.00508763		1065.01	-0.000472301		1065.01	-0.00546905		1065.01	0.00266481		1065.01	-0.00543381		1065.01	-0.00302982		1065.01	0.00504562		1065.01	0.00912776		1065.01	0.00397621		1065.01	0.0110894		1065.01	0.00726425		1065.01	0.00334895
	1065.49	0.00705699		1065.49	0.00237404		1065.49	-0.00379698		1065.49	0.00415163		1065.49	-0.00265785		1065.49	-0.000758934		1065.49	0.00596971		1065.49	0.0120939		1065.49	0.00828422		1065.49	0.0099172		1065.49	0.00771537		1065.49	0.00572617
	1065.98	0.00782739		1065.98	0.00445197		1065.98	-0.00304417		1065.98	0.0050051		1065.98	-0.000934864		1065.98	0.00126767		1065.98	0.00554974		1065.98	0.0133426		1065.98	0.0111409		1065.98	0.00757967		1065.98	0.00725347		1065.98	0.00735213
	1066.46	0.00702069		1066.46	0.00546353		1066.46	-0.00355685		1066.46	0.005		1066.46	-0.000797268		1066.46	0.00264511		1066.46	0.00366169		1066.46	0.0125586		1066.46	0.0119157		1066.46	0.00431765		1066.46	0.00570233		1066.46	0.00771061
	1066.94	0.00466435		1066.94	0.00528795		1066.94	-0.00539673		1066.94	0.00407082		1066.94	-0.00239616		1066.94	0.00310263		1066.94	0.000545596		1066.94	0.00992625		1066.94	0.0105025		1066.94	0.00050174		1066.94	0.00314388		1066.94	0.00664337
	1067.42	0.00112002		1067.42	0.00396862		1067.42	-0.00833814		1067.42	0.00231481		1067.42	-0.00548188		1067.42	0.00257741		1067.42	-0.00330806		1067.42	0.00600657		1067.42	0.00727571		1067.42	-0.00346364		1067.42	-0.00010903		1067.42	0.00434727
	1067.91	-0.00305798		1067.91	0.00170467		1067.91	-0.0119391		1067.91	-2.6407e-05		1067.91	-0.00947753		1067.91	0.00124245		1067.91	-0.00728771		1067.91	0.00154986		1067.91	0.00295432		1067.91	-0.00719624		1067.91	-0.00357377		1067.91	0.00128136
	1068.39	-0.00721784		1068.39	-0.00115392		1068.39	-0.0156174		1068.39	-0.00259346		1068.39	-0.0136133		1068.39	-0.000520522		1068.39	-0.0107794		1068.39	-0.00267		1068.39	-0.00160186		1068.39	-0.0103178		1068.39	-0.00668118		1068.39	-0.00196398
	1068.87	-0.0107068		1068.87	-0.0041109		1068.87	-0.018779		1068.87	-0.00495155		1068.87	-0.0171021		1068.87	-0.00221179		1068.87	-0.013257		1068.87	-0.0059911		1068.87	-0.00557567		1068.87	-0.0124886		1068.87	-0.00890779		1068.87	-0.00478559
	1069.35	-0.0129702		1069.35	-0.00662316		1069.35	-0.0209587		1069.35	-0.00668735		1069.35	-0.0193573		1069.35	-0.00337099		1069.35	-0.014403		1069.35	-0.00799287		1069.35	-0.00840893		1069.35	-0.0134492		1069.35	-0.00992209		1069.35	-0.00670086
	1069.84	-0.0136757		1069.84	-0.00824091		1069.84	-0.0219639		1069.84	-0.00752751		1069.84	-0.0201523		1069.84	-0.00374971		1069.84	-0.0141779		1069.84	-0.00857594		1069.84	-0.00992805		1069.84	-0.0130999		1069.84	-0.00969689		1069.84	-0.00745199
	1070.32	-0.0127777		1070.32	-0.00875376		1070.32	-0.0218997		1070.32	-0.00741098		1070.32	-0.0196508		1070.32	-0.00339059		1070.32	-0.0128004		1070.32	-0.00793526		1070.32	-0.0103318		1070.32	-0.0115215		1070.32	-0.008517		1070.32	-0.00702602
	1070.8	-0.0105114		1070.8	-0.00822169		1070.8	-0.0210783		1070.8	-0.00647156		1070.8	-0.0182551		1070.8	-0.00258045		1070.8	-0.0106322		1070.8	-0.006446		1070.8	-0.010023		1070.8	-0.00894989		1070.8	-0.00684074		1070.8	-0.00559556
	1071.28	-0.00731436		1071.28	-0.00690371		1071.28	-0.0198615		1071.28	-0.00495197		1071.28	-0.0164096		1071.28	-0.00168903		1071.28	-0.00803867		1071.28	-0.00452256		1071.28	-0.00940624		1071.28	-0.00568854		1071.28	-0.00514766		1071.28	-0.00341929
	1071.76	-0.00376321		1071.76	-0.00513767		1071.76	-0.0185382		1071.76	-0.00311904		1071.76	-0.0144473		1071.76	-0.0010155		1071.76	-0.00529708		1071.76	-0.00253747		1071.76	-0.00873084		1071.76	-0.00207028		1071.76	-0.00380165		1071.76	-0.000773653
	1072.24	-0.000486533		1072.24	-0.00322447		1072.24	-0.0172565		1072.24	-0.00121029		1072.24	-0.0125372		1072.24	-0.000671737		1072.24	-0.00258687		1072.24	-0.000794324		1072.24	-0.00804977		1072.24	0.00157912		1072.24	-0.00298411		1072.24	0.00205958
	1072.73	0.00194441		1072.73	-0.00134362		1072.73	-0.0160259		1072.73	0.000593803		1072.73	-0.0107086		1072.73	-0.000547394		1072.73	2.18685e-06		1072.73	0.000485685		1072.73	-0.00725581		1072.73	0.00495647		1072.73	-0.0026726		1072.73	0.00481044
	1073.21	0.00319081		1073.21	0.000484657		1073.21	-0.0147552		1073.21	0.00217542		1073.21	-0.00892123		1073.21	-0.00037326		1073.21	0.00243071		1073.21	0.00118646		1073.21	-0.00618178		1073.21	0.0078313		1073.21	-0.00266071		1073.21	0.00726038
	1073.69	0.00326511		1073.69	0.00236701		1073.69	-0.0133136		1073.69	0.00347942		1073.69	-0.00712079		1073.69	0.000165536		1073.69	0.00467494		1073.69	0.00132506		1073.69	-0.00469376		1073.69	0.0100923		1073.69	-0.00263509		1073.69	0.00931137
	1074.17	0.00250985		1074.17	0.00441876		1074.17	-0.0115944		1074.17	0.00448451		1074.17	-0.00529383		1074.17	0.00126823		1074.17	0.00668791		1074.17	0.00103505		1074.17	-0.00277125		1074.17	0.0117495		1074.17	-0.00229195		1074.17	0.0110127
	1074.66	0.00142744		1074.66	0.00666412		1074.66	-0.0095505		1074.66	0.00518087		1074.66	-0.00346294		1074.66	0.00296236		1074.66	0.00837957		1074.66	0.000521146		1074.66	-0.000500433		1074.66	0.0128862		1074.66	-0.00142382		1074.66	0.0125421
	1075.14	0.000474573		1075.14	0.00894321		1075.14	-0.00719937		1075.14	0.00554632		1075.14	-0.00167309		1075.14	0.00511006		1075.14	0.00961113		1075.14	-8.81357e-06		1075.14	0.00193073		1075.14	0.0135876		1075.14	2.68063e-05		1075.14	0.0141111
	1075.62	-9.92251e-05		1075.62	0.0109247		1075.62	-0.00463449		1075.62	0.00554011		1075.62	2.4553e-05		1075.62	0.00747323		1075.62	0.0102269		1075.62	-0.000401366		1075.62	0.00426953		1075.62	0.0138696		1075.62	0.00196561		1075.62	0.0158654
	1076.1	-0.00026168		1076.1	0.0122053		1076.1	-0.00199663		1076.1	0.00513993		1076.1	0.00158926		1076.1	0.00980057		1076.1	0.0101139		1076.1	-0.000574694		1076.1	0.00621982		1076.1	0.0137048		1076.1	0.00418341		1076.1	0.0178069
	1076.58	-0.000148084		1076.58	0.0124872		1076.58	0.000532492		1076.58	0.00438385		1076.58	0.00299705		1076.58	0.0118952		1076.58	0.00929251		1076.58	-0.000508409		1076.58	0.00748803		1076.58	0.0130568		1076.58	0.00641067		1076.58	0.0197756
	1077.07	6.19651e-05		1077.07	0.0117493		1077.07	0.00277738		1077.07	0.00340221		1077.07	0.00424146		1077.07	0.0136444		1077.07	0.0079629		1077.07	-0.00021853		1077.07	0.00785708		1077.07	0.0119605		1077.07	0.00840528		1077.07	0.0214953
	1077.55	0.000258821		1077.55	0.0103279		1077.55	0.00461187		1077.55	0.00240506		1077.55	0.00533662		1077.55	0.0150254		1077.55	0.00647383		1077.55	0.000296253		1077.55	0.00727153		1077.55	0.0105581		1077.55	0.010041		1077.55	0.0226812
	1078.03	0.000466446		1078.03	0.00878762		1078.03	0.00599746		1078.03	0.0016302		1078.03	0.0062896		1078.03	0.0160324		1078.03	0.00520716		1078.03	0.00108264		1078.03	0.00586787		1078.03	0.00906969		1078.03	0.0113394		1078.03	0.0231435
	1078.51	0.000788145		1078.51	0.00769806		1078.51	0.00695479		1078.51	0.00126501		1078.51	0.0070842		1078.51	0.0166213		1078.51	0.00443811		1078.51	0.00222854		1078.51	0.00395026		1078.51	0.00771951		1078.51	0.012426		1078.51	0.0228237
	1078.99	0.00130682		1078.99	0.00739743		1078.99	0.00753803		1078.99	0.00139283		1078.99	0.00764026		1078.99	0.0166589		1078.99	0.00424725		1078.99	0.00381807		1078.99	0.00189512		1078.99	0.00665484		1078.99	0.0134184		1078.99	0.0217545
	1079.48	0.00197546		1079.48	0.00787253		1079.48	0.00777035		1079.48	0.00196614		1079.48	0.00781262		1079.48	0.0159578		1079.48	0.00452083		1079.48	0.00585286		1079.48	7.46243e-05		1079.48	0.00588886		1079.48	0.0143153		1079.48	0.0200049
	1079.96	0.00257981		1079.96	0.00875749		1079.96	0.00765068		1079.96	0.00280209		1079.96	0.00740727		1079.96	0.0143544		1079.96	0.00500346		1079.96	0.00817411		1079.96	-0.00122889		1079.96	0.00531136		1079.96	0.0149474		1079.96	0.0176333
	1080.44	0.00279272		1080.44	0.00945811		1080.44	0.00714978		1080.44	0.00361281		1080.44	0.00625383		1080.44	0.0118212		1080.44	0.00541056		1080.44	0.0104255		1080.44	-0.00188537		1080.44	0.00471068		1080.44	0.0149979		1080.44	0.0147046
	1080.92	0.00231747		1080.92	0.00939624		1080.92	0.00626405		1080.92	0.00407008		1080.92	0.00428248		1080.92	0.00853201		1080.92	0.00554212		1080.92	0.0121116		1080.92	-0.00196454		1080.92	0.00386407		1080.92	0.0141205		1080.92	0.0113214
	1081.41	0.00105295		1081.41	0.00825515		1081.41	0.00503667		1081.41	0.0038997		1081.41	0.00159578		1081.41	0.0048369		1081.41	0.00536191		1081.41	0.0127386		1081.41	-0.00170197		1081.41	0.00261931		1081.41	0.0121163		1081.41	0.00765736
	1081.89	-0.000836921		1081.89	0.00610686		1081.89	0.00357082		1081.89	0.00296589		1081.89	-0.00154771		1081.89	0.00113188		1081.89	0.00497493		1081.89	0.0119908		1081.89	-0.00141041		1081.89	0.000960258		1081.89	0.00904266		1081.89	0.00395237
	1082.37	-0.0029878		1082.37	0.00336017		1082.37	0.00200459		1082.37	0.00129409		1082.37	-0.00479064		1082.37	-0.00226997		1082.37	0.00452857		1082.37	0.00982697		1082.37	-0.00135472		1082.37	-0.0009992		1082.37	0.00523234		1082.37	0.000481273
	1082.85	-0.00497235		1082.85	0.000565734		1082.85	0.000500845		1082.85	-0.000941014		1082.85	-0.00775886		1082.85	-0.00519903		1082.85	0.00409256		1082.85	0.00648267		1082.85	-0.00166834		1082.85	-0.00304601		1082.85	0.00120988		1082.85	-0.0024839
	1083.33	-0.0064571		1083.33	-0.00177649		1083.33	-0.000777027		1083.33	-0.0034541		1083.33	-0.0101155		1083.33	-0.00760794		1083.33	0.00359824		1083.33	0.00242045		1083.33	-0.00231512		1083.33	-0.0049407		1083.33	-0.00242427		1083.33	-0.0047053
	1083.82	-0.00729051		1083.82	-0.00336136		1083.82	-0.00166454		1083.82	-0.0059025		1083.82	-0.0116102		1083.82	-0.00950382		1083.82	0.00284061		1083.82	-0.00176194		1083.82	-0.00312905		1083.82	-0.00645465		1083.82	-0.00511557		1083.82	-0.00602502
	1084.3	-0.00753184		1084.3	-0.00413532		1084.3	-0.00202678		1084.3	-0.00794297		1084.3	-0.0121108		1084.3	-0.0108892		1084.3	0.00159492		1084.3	-0.00543299		1084.3	-0.00388103		1084.3	-0.00743287		1084.3	-0.00648661		1084.3	-0.00640248
	1084.78	-0.00738802		1084.78	-0.0042822		1084.78	-0.00179226		1084.78	-0.00932355		1084.78	-0.01164		1084.78	-0.0117434		1084.78	-0.000241447		1084.78	-0.00806378		1084.78	-0.00439082		1084.78	-0.00782694		1084.78	-0.00644881		1084.78	-0.00595143
	1085.26	-0.00708379		1085.26	-0.00410116		1085.26	-0.000986538		1085.26	-0.00994618		1085.26	-0.0103474		1085.26	-0.0120398		1085.26	-0.00253509		1085.26	-0.00934894		1085.26	-0.00458401		1085.26	-0.0076865		1085.26	-0.00522804		1085.26	-0.00491037
	1085.74	-0.00672732		1085.74	-0.00387035		1085.74	0.000270524		1085.74	-0.00988096		1085.74	-0.00844549		1085.74	-0.0117875		1085.74	-0.00491967		1085.74	-0.00924081		1085.74	-0.00450213		1085.74	-0.00711068		1085.74	-0.00326429		1085.74	-0.0035532
	1086.23	-0.00625171		1086.23	-0.00373138		1086.23	0.00178957		1086.23	-0.009311		1086.23	-0.00612069		1086.23	-0.011059		1086.23	-0.00691643		1086.23	-0.00789814		1086.23	-0.00424043		1086.23	-0.00618158		1086.23	-0.00104349		1086.23	-0.00210454
	1086.71	-0.00546169		1086.71	-0.00367642		1086.71	0.0033576		1086.71	-0.00843889		1086.71	-0.0034991		1086.71	-0.00999884		1086.71	-0.00808349		1086.71	-0.00558666		1086.71	-0.00387974		1086.71	-0.00491813		1086.71	0.00105298		1086.71	-0.000684871
	1087.19	-0.00415137		1087.19	-0.00361646		1087.19	0.0047629		1087.19	-0.00742675		1087.19	-0.000664855		1087.19	-0.00880497		1087.19	-0.00813774		1087.19	-0.00261102		1087.19	-0.00342905		1087.19	-0.00329103		1087.19	0.00280726		1087.19	0.000670819
	1087.67	-0.00223275		1087.67	-0.00346978		1087.67	0.00583362		1087.67	-0.00636147		1087.67	0.00227363		1087.67	-0.00769285		1087.67	-0.0070373		1087.67	0.000699194		1087.67	-0.00284042		1087.67	-0.00127039		1087.67	0.00415521		1087.67	0.00195446
	1088.15	0.000162918		1088.15	-0.00323759		1088.15	0.00645234		1088.15	-0.00527135		1088.15	0.00513208		1088.15	-0.00685215		1088.15	-0.00501178		1088.15	0.00398203		1088.15	-0.00205415		1088.15	0.00108264		1088.15	0.00511951		1088.15	0.00312435
	1088.64	0.00270042		1088.64	-0.00301692		1088.64	0.00659586		1088.64	-0.00415003		1088.64	0.00765493		1088.64	-0.00638524		1088.64	-0.00249728		1088.64	0.00687763		1088.64	-0.00106567		1088.64	0.00358572		1088.64	0.00575501		1088.64	0.00408787
	1089.12	0.00493897		1089.12	-0.00295525		1089.12	0.00632238		1089.12	-0.00299563		1089.12	0.00958359		1089.12	-0.00627477		1089.12	-4.60561e-06		1089.12	0.00908475		1089.12	4.1784e-05		1089.12	0.00593999		1089.12	0.00609715		1089.12	0.00471299
	1089.6	0.00651274		1089.6	-0.00316506		1089.6	0.00574463		1089.6	-0.00182496		1089.6	0.0107473		1089.6	-0.00639712		1089.6	0.00206351		1089.6	0.0104411		1089.6	0.0011159		1089.6	0.00782479		1089.6	0.00615156		1089.6	0.00488458
	1090.08	0.00725259		1090.08	-0.0036432		1090.08	0.00497165		1090.08	-0.000684804		1090.08	0.0111132		1090.08	-0.00656223		1090.08	0.00351757		1090.08	0.0109441		1090.08	0.00200086		1090.08	0.00898823		1090.08	0.00591506		1090.08	0.0045517
	1090.57	0.00721799		1090.57	-0.00426386		1090.57	0.00407938		1090.57	0.000364329		1090.57	0.0107659		1090.57	-0.00658094		1090.57	0.00438013		1090.57	0.0107248		1090.57	0.00259248		1090.57	0.0093224		1090.57	0.00540076		1090.57	0.00374511
	1091.05	0.00661302		1091.05	-0.00481728		1091.05	0.00309318		1091.05	0.0012469		1091.05	0.00984724		1091.05	-0.00630341		1091.05	0.00479593		1091.05	0.00998073		1091.05	0.00287209		1091.05	0.00886397		1091.05	0.00465883		1091.05	0.00257371
	1091.53	0.00569847		1091.53	-0.00509101		1091.53	0.0020199		1091.53	0.00188068		1091.53	0.0084889		1091.53	-0.00564956		1091.53	0.0049199		1091.53	0.00891872		1091.53	0.00289277		1091.53	0.00779882		1091.53	0.00378511		1091.53	0.00119221
	1092.01	0.00467353		1092.01	-0.00497389		1092.01	0.000864963		1092.01	0.00217505		1092.01	0.00676639		1092.01	-0.00463308		1092.01	0.00484149		1092.01	0.0076983		1092.01	0.00272439		1092.01	0.00638569		1092.01	0.00288126		1092.01	-0.000237109
	1092.49	0.00361338		1092.49	-0.00453062		1092.49	-0.000344358		1092.49	0.00204164		1092.49	0.00467959		1092.49	-0.00336813		1092.49	0.0045512		1092.49	0.00639954		1092.49	0.00239113		1092.49	0.00489179		1092.49	0.00201228		1092.49	-0.00158852
	1092.98	0.00243834		1092.98	-0.00400521		1092.98	-0.00157855		1092.98	0.00140517		1092.98	0.00218698		1092.98	-0.00205168		1092.98	0.00397049		1092.98	0.00501485		1092.98	0.00182314		1092.98	0.00349515		1092.98	0.00115819		1092.98	-0.00281204
	1093.46	0.000965073		1093.46	-0.00374397		1093.46	-0.00282083		1093.46	0.00022043		1093.46	-0.000755197		1093.46	-0.000925507		1093.46	0.0030076		1093.46	0.00348109		1093.46	0.000876019		1093.46	0.00224153		1093.46	0.000209093		1093.46	-0.00393412
	1093.94	-0.00100888		1093.94	-0.0040529		1093.94	-0.00409532		1093.94	-0.0015104		1093.94	-0.00412065		1093.94	-0.000223233		1093.94	0.00161537		1093.94	0.00174087		1093.94	-0.000592993		1093.94	0.00106198		1093.94	-0.000978075		1093.94	-0.00502397
	1094.42	-0.00359385		1094.42	-0.00507945		1094.42	-0.00543738		1094.42	-0.00371112		1094.42	-0.00776836		1094.42	-0.000131522		1094.42	-0.000168851		1094.42	-0.000184054		1094.42	-0.0026263		1094.42	-0.000135994		1094.42	-0.00249665		1094.42	-0.00613229
	1094.9	-0.00673231		1094.9	-0.00673935		1094.9	-0.0068651		1094.9	-0.00620501		1094.9	-0.0114191		1094.9	-0.000756189		1094.9	-0.00220885		1094.9	-0.00214288		1094.9	-0.00507054		1094.9	-0.00137804		1094.9	-0.00430714		1094.9	-0.00723968
	1095.39	-0.0101435		1095.39	-0.00871515		1095.39	-0.00831597		1095.39	-0.00870125		1095.39	-0.0146818		1095.39	-0.00208686		1095.39	-0.00427636		1095.39	-0.00385321		1095.39	-0.00755239		1095.39	-0.0025485		1095.39	-0.00618315		1095.39	-0.0082373
	1095.87	-0.013343		1095.87	-0.0105237		1095.87	-0.00962479		1095.87	-0.0108237		1095.87	-0.017128		1095.87	-0.00396344		1095.87	-0.00607132		1095.87	-0.00495669		1095.87	-0.00953339		1095.87	-0.00339454		1095.87	-0.00773581		1095.87	-0.00893483
	1096.35	-0.0157652		1096.35	-0.01167		1096.35	-0.0105406		1096.35	-0.0122157		1096.35	-0.018442		1096.35	-0.00609138		1096.35	-0.00729269		1096.35	-0.00514861		1096.35	-0.0104972		1096.35	-0.00360673		1096.35	-0.00853656		1096.35	-0.00912879
	1096.83	-0.0169363		1096.83	-0.0118289		1096.83	-0.0108103		1096.83	-0.0126649		1096.83	-0.0185345		1096.83	-0.00809839		1096.83	-0.00771153		1096.83	-0.00430737		1096.83	-0.0101469		1096.83	-0.00295697		1096.83	-0.00827917		1096.83	-0.00867572
	1097.32	-0.0166411		1097.32	-0.0109743		1097.32	-0.0102845		1097.32	-0.0121894		1097.32	-0.017582		1097.32	-0.00965285		1097.32	-0.00724766		1097.32	-0.00257416		1097.32	-0.008548		1097.32	-0.00141424		1097.32	-0.00692527		1097.32	-0.00755467
	1097.8	-0.014981		1097.8	-0.00937057		1097.8	-0.00898965		1097.8	-0.0110293		1097.8	-0.0159346		1097.8	-0.0105389		1097.8	-0.0059761		1097.8	-0.000316017		1097.8	-0.00610194		1097.8	0.000820245		1097.8	-0.00472614		1097.8	-0.00587559
	1098.28	-0.0123184		1098.28	-0.00746899		1098.28	-0.00713536		1098.28	-0.00954995		1098.28	-0.0139766		1098.28	-0.0106873		1098.28	-0.00410368		1098.28	0.00198199		1098.28	-0.00340831		1098.28	0.00336892		1098.28	-0.00214823		1098.28	-0.00385029
	1098.76	-0.00918369		1098.76	-0.00575836		1098.76	-0.0050898		1098.76	-0.00813523		1098.76	-0.0120091		1098.76	-0.0101535		1098.76	-0.00192614		1098.76	0.00383649		1098.76	-0.00107589		1098.76	0.00575951		1098.76	0.000249902		1098.76	-0.00175679
	1099.24	-0.00616453		1099.24	-0.00463846		1099.24	-0.00329784		1099.24	-0.0071008		1099.24	-0.0102057		1099.24	-0.00909187		1099.24	0.00019706		1099.24	0.00486502		1099.24	0.000419514		1099.24	0.00753658		1099.24	0.00196175		1099.24	9.24869e-05
	1099.73	-0.00380467		1099.73	-0.00432331		1099.73	-0.00219217		1099.73	-0.00664447		1099.73	-0.00862444		1099.73	-0.00773943		1099.73	0.00189376		1099.73	0.0048624		1099.73	0.000843749		1099.73	0.00835248		1099.73	0.00264901		1099.73	0.00138738
	1100.21	-0.00249059		1100.21	-0.00481335		1100.21	-0.00206648		1100.21	-0.00683516		1100.21	-0.0072735		1100.21	-0.00640676		1100.21	0.00284231		1100.21	0.00382673		1100.21	0.000212872		1100.21	0.00804903		1100.21	0.00223596		1100.21	0.00187409
	1100.69	-0.00236541		1100.69	-0.00592806		1100.69	-0.00298076		1100.69	-0.00763223		1100.69	-0.0061578		1100.69	-0.00542327		1100.69	0.00285588		1100.69	0.00193366		1100.69	-0.00125361		1100.69	0.00668956		1100.69	0.000925259		1100.69	0.00142142
	1101.17	-0.00333223		1101.17	-0.00742193		1101.17	-0.00475213		1101.17	-0.00893645		1101.17	-0.00533272		1101.17	-0.00509317		1101.17	0.00191506		1101.17	-0.000564204		1101.17	-0.00327294		1101.17	0.00450178		1101.17	-0.000906661		1101.17	4.51309e-05
	1101.65	-0.00513813		1101.65	-0.00908544		1101.65	-0.00703414		1101.65	-0.0106289		1101.65	-0.00489408		1101.65	-0.00561947		1101.65	0.0001543		1101.65	-0.00343602		1101.65	-0.00559991		1101.65	0.00178728		1101.65	-0.00284015		1101.65	-0.00210836
	1102.14	-0.00746228		1102.14	-0.010795		1102.14	-0.00941074		1102.14	-0.0125653		1102.14	-0.00494336		1102.14	-0.00704454		1102.14	-0.00219145		1102.14	-0.00651918		1102.14	-0.00806206		1102.14	-0.00114631		1102.14	-0.00452554		1102.14	-0.0047929
	1102.62	-0.00998317		1102.62	-0.0124852		1102.62	-0.0114773		1102.62	-0.0145374		1102.62	-0.00552045		1102.62	-0.00919686		1102.62	-0.00482266		1102.62	-0.0096929		1102.62	-0.0105058		1102.62	-0.00400908		1102.62	-0.00572356		1102.62	-0.00769174
	1103.1	-0.0123798		1103.1	-0.0140667		1103.1	-0.0128732		1103.1	-0.0162374		1103.1	-0.00654412		1103.1	-0.0116636		1103.1	-0.00740694		1103.1	-0.0128058		1103.1	-0.012718		1103.1	-0.00650388		1103.1	-0.00629916		1103.1	-0.0104402
	1103.58	-0.0143298		1103.58	-0.0153595		1103.58	-0.0133197		1103.58	-0.0172672		1103.58	-0.00777594		1103.58	-0.0138213		1103.58	-0.00959063		1103.58	-0.0156206		1103.58	-0.0143841		1103.58	-0.00833573		1103.58	-0.00620027		1103.58	-0.0126529
	1104.07	-0.0155316		1104.07	-0.0160848		1104.07	-0.0126568		1104.07	-0.017239		1104.07	-0.00885987		1104.07	-0.0149873		1104.07	-0.0110491		1104.07	-0.0178117		1104.07	-0.0151463		1104.07	-0.00925635		1104.07	-0.00544811		1104.07	-0.0139966
	1104.55	-0.0157725		1104.55	-0.0159384		1104.55	-0.0108869		1104.55	-0.0159215		1104.55	-0.00943208		1104.55	-0.0146345		1104.55	-0.0115549		1104.55	-0.0190452		1104.55	-0.0147327		1104.55	-0.00915377		1104.55	-0.00412804		1104.55	-0.014278
	1105.03	-0.0149881		1105.03	-0.0147219		1105.03	-0.00817643		1105.03	-0.0133533		1105.03	-0.00925823		1105.03	-0.0125966		1105.03	-0.0110364		1105.03	-0.0190829		1105.03	-0.0130931		1105.03	-0.00810756		1105.03	-0.00238202		1105.03	-0.0134951
	1105.51	-0.0132954		1105.51	-0.0124322		1105.51	-0.00482439		1105.51	-0.00985229		1105.51	-0.00831564		1105.51	-0.00912438		1105.51	-0.00958722		1105.51	-0.0178521		1105.51	-0.0104394		1105.51	-0.00637927		1105.51	-0.000387495		1105.51	-0.0118269
	1105.99	-0.0109665		1105.99	-0.00930938		1105.99	-0.00121541		1105.99	-0.00593489		1105.99	-0.00679517		1105.99	-0.00481974		1105.99	-0.00744483		1105.99	-0.0154634		1105.99	-0.00720719		1105.99	-0.00434135		1105.99	0.00165079		1105.99	-0.00957513
	1106.48	-0.00838358		1106.48	-0.00580769		1106.48	0.00220769		1106.48	-0.00218733		1106.48	-0.00504025		1106.48	-0.000480906		1106.48	-0.00494499		1106.48	-0.0121869		1106.48	-0.00393718		1106.48	-0.00238591		1106.48	0.00350795		1106.48	-0.00709908
	1106.96	-0.00597195		1106.96	-0.00252485		1106.96	0.00498398		1106.96	0.000855203		1106.96	-0.00345857		1106.96	0.00307179		1106.96	-0.00249507		1106.96	-0.00842846		1106.96	-0.00115825		1106.96	-0.000832886		1106.96	0.00495144		1106.96	-0.00477681
	1107.44	-0.00411629		1107.44	-6.89133e-05		1107.44	0.00669155		1107.44	0.002827		1107.44	-0.00240894		1107.44	0.005202		1107.44	-0.000509899		1107.44	-0.00468065		1107.44	0.00073537		1107.44	0.000128181		1107.44	0.00577005		1107.44	-0.00295861
	1107.92	-0.0030568		1107.92	0.00111397		1107.92	0.00705921		1107.92	0.00361351		1107.92	-0.00210203		1107.92	0.00562912		1107.92	0.00066853		1107.92	-0.00143951		1107.92	0.00158045		1107.92	0.000482103		1107.92	0.00582405		1107.92	-0.00190523
	1108.4	-0.00282679		1108.4	0.000891491		1108.4	0.00605065		1108.4	0.00335222		1108.4	-0.00252739		1108.4	0.00450811		1108.4	0.00086586		1108.4	0.000908923		1108.4	0.00146291		1108.4	0.000363699		1108.4	0.00508723		1108.4	-0.00173679
	1108.89	-0.00324604		1108.89	-0.000521283		1108.89	0.00389874		1108.89	0.00235441		1108.89	-0.00346725		1108.89	0.00234339		1108.89	0.000119034		1108.89	0.00218505		1108.89	0.000650477		1108.89	-9.01236e-06		1108.89	0.00365271		1108.89	-0.00239896
	1109.37	-0.00401262		1109.37	-0.00265528		1109.37	0.00103558		1109.37	0.00095365		1109.37	-0.00457758		1109.37	-0.000216344		1109.37	-0.00134538		1109.37	0.00243827		1109.37	-0.000537201		1109.37	-0.000438242		1109.37	0.0017071		1109.37	-0.00369643
	1109.85	-0.00480837		1109.85	-0.00496298		1109.85	-0.00200336		1109.85	-0.000592165		1109.85	-0.00550452		1109.85	-0.00258368		1109.85	-0.00319174		1109.85	0.00189872		1109.85	-0.0018469		1109.85	-0.000809538		1109.85	-0.000510229		1109.85	-0.00534502
	1110.33	-0.00539951		1110.33	-0.00696887		1110.33	-0.0046834		1110.33	-0.00214127		1110.33	-0.00597221		1110.33	-0.0043612		1110.33	-0.00505669		1110.33	0.000893848		1110.33	-0.0031278		1110.33	-0.00112153		1110.33	-0.00274228		1110.33	-0.00703587
	1110.82	-0.00567631		1110.82	-0.00837272		1110.82	-0.00653867		1110.82	-0.00363062		1110.82	-0.00585265		1110.82	-0.00537716		1110.82	-0.00662398		1110.82	-0.000238202		1110.82	-0.00431603		1110.82	-0.0014504		1110.82	-0.00472323		1110.82	-0.00849225
	1111.3	-0.00565538		1111.3	-0.00908385		1111.3	-0.00725659		1111.3	-0.00501028		1111.3	-0.00517529		1111.3	-0.0056697		1111.3	-0.00767527		1111.3	-0.00121495		1111.3	-0.00537108		1111.3	-0.00189481		1111.3	-0.00620618		1111.3	-0.00951553
	1111.78	-0.0054432		1111.78	-0.00919777		1111.78	-0.00673521		1111.78	-0.00619364		1111.78	-0.00411813		1111.78	-0.00542638		1111.78	-0.00811598		1111.78	-0.00186722		1111.78	-0.00623349		1111.78	-0.00251263		1111.78	-0.00700858		1111.78	-0.0100232
	1112.26	-0.00517179		1112.26	-0.00891889		1112.26	-0.00512484		1112.26	-0.0070568		1112.26	-0.00292636		1112.26	-0.00490591		1112.26	-0.00797534		1112.26	-0.00215874		1112.26	-0.00680544		1112.26	-0.00327998		1112.26	-0.00705526		1112.26	-0.0100589
	1112.74	-0.00494873		1112.74	-0.00846508		1112.74	-0.00278946		1112.74	-0.00748661		1112.74	-0.00183506		1112.74	-0.00437133		1112.74	-0.00737805		1112.74	-0.0021744		1112.74	-0.00699074		1112.74	-0.0041048		1112.74	-0.00640591		1112.74	-0.00976156
	1113.23	-0.00483265		1113.23	-0.00796919		1113.23	-0.000220219		1113.23	-0.0074403		1113.23	-0.000996092		1113.23	-0.0040292		1113.23	-0.00647939		1113.23	-0.00206724		1113.23	-0.00673345		1113.23	-0.00486122		1113.23	-0.00522345		1113.23	-0.00930081
	1113.71	-0.00484156		1113.71	-0.00746652		1113.71	0.00206458		1113.71	-0.00698295		1113.71	-0.00047005		1113.71	-0.00402411		1113.71	-0.00543129		1113.71	-0.0020031		1113.71	-0.00606155		1113.71	-0.00543316		1113.71	-0.0037346		1113.71	-0.00882046
	1114.19	-0.00497539		1114.19	-0.00691216		1114.19	0.00359848		1114.19	-0.00628349		1114.19	-0.000240553		1114.19	-0.00443556		1114.19	-0.00436323		1114.19	-0.00211351		1114.19	-0.00508629		1114.19	-0.00574564		1114.19	-0.00217496		1114.19	-0.00839602
	1114.67	-0.0052266		1114.67	-0.0062444		1114.67	0.00404807		1114.67	-0.00558483		1114.67	-0.000251382		1114.67	-0.00527017		1114.67	-0.00339628		1114.67	-0.00247273		1114.67	-0.00399119		1114.67	-0.00576254		1114.67	-0.000746431		1114.67	-0.00803314
	1115.15	-0.00558211		1115.15	-0.00543829		1115.15	0.0032784		1115.15	-0.0051303		1115.15	-0.000416097		1115.15	-0.00644737		1115.15	-0.00264174		1115.15	-0.00308921		1115.15	-0.0029778		1115.15	-0.00549715		1115.15	0.000411554		1115.15	-0.00767856
	1115.64	-0.00600417		1115.64	-0.00454312		1115.64	0.00141231		1115.64	-0.00508092		1115.64	-0.000630646		1115.64	-0.00779629		1115.64	-0.00219095		1115.64	-0.003909		1115.64	-0.00221716		1115.64	-0.00500602		1115.64	0.00124471		1115.64	-0.00724636
	1116.12	-0.0064315		1116.12	-0.00367902		1116.12	-0.00120315		1116.12	-0.00545861		1116.12	-0.000767203		1116.12	-0.00908639		1116.12	-0.00209234		1116.12	-0.00483923		1116.12	-0.00178949		1116.12	-0.00438373		1116.12	0.00177956		1116.12	-0.00665443
	1116.6	-0.00678078		1116.6	-0.00300353		1116.6	-0.00409879		1116.6	-0.00613588		1116.6	-0.000691652		1116.6	-0.0100873		1116.6	-0.00232399		1116.6	-0.00577189		1116.6	-0.00167656		1116.6	-0.00374761		1116.6	0.00208808		1116.6	-0.00584657
	1117.08	-0.00697581		1117.08	-0.00265357		1117.08	-0.00683751		1117.08	-0.00690136		1117.08	-0.000280621		1117.08	-0.0106383		1117.08	-0.00279963		1117.08	-0.00661347		1117.08	-0.00179576		1117.08	-0.00322585		1117.08	0.00223873		1117.08	-0.00481512
	1117.57	-0.00696261		1117.57	-0.0027108		1117.57	-0.00911134		1117.57	-0.00753852		1117.57	0.000537203		1117.57	-0.0106813		1117.57	-0.00338431		1117.57	-0.0072907		1117.57	-0.00205553		1117.57	-0.00293676		1117.57	0.00225618		1117.57	-0.00360085
	1118.05	-0.00672105		1118.05	-0.00316928		1118.05	-0.0107786		1118.05	-0.00788818		1118.05	0.00175388		1118.05	-0.0102605		1118.05	-0.00391659		1118.05	-0.00774594		1118.05	-0.0023868		1118.05	-0.0029746		1118.05	0.00211828		1118.05	-0.00228704
	1118.53	-0.0062618		1118.53	-0.00392969		1118.53	-0.0118417		1118.53	-0.00789108		1118.53	0.00324298		1118.53	-0.00949838		1118.53	-0.00424913		1118.53	-0.0079419		1118.53	-0.00275867		1118.53	-0.00338359		1118.53	0.00178538		1118.53	-0.0009992
	1119.01	-0.00561921		1119.01	-0.00480598		1119.01	-0.0124033		1119.01	-0.00758258		1119.01	0.00476601		1119.01	-0.00855388		1119.01	-0.00427328		1119.01	-0.00786713		1119.01	-0.00315585		1119.01	-0.0041412		1119.01	0.00124826		1119.01	0.000120293
	1119.49	-0.00483442		1119.49	-0.00556177		1119.49	-0.0126096		1119.49	-0.00707499		1119.49	0.0060109		1119.49	-0.00757108		1119.49	-0.00395067		1119.49	-0.00755692		1119.49	-0.00355833		1119.49	-0.00515437		1119.49	0.000571806		1119.49	0.000947772
	1119.98	-0.00395346		1119.98	-0.00597809		1119.98	-0.0125995		1119.98	-0.00651435		1119.98	0.00668869		1119.98	-0.00664193		1119.98	-0.00332976		1119.98	-0.00710289		1119.98	-0.00392509		1119.98	-0.00628992		1119.98	-0.00010436		1119.98	0.00141587
	1120.46	-0.0030238		1120.46	-0.00592073		1120.46	-0.0124614		1120.46	-0.00602773		1120.46	0.00662547		1120.46	-0.00579422		1120.46	-0.00252992		1120.46	-0.00664186		1120.46	-0.00420601		1120.46	-0.00742049		1120.46	-0.000597195		1120.46	0.00154484
	1120.94	-0.00211924		1120.94	-0.00538436		1120.94	-0.0122274		1120.94	-0.00570267		1120.94	0.00580232		1120.94	-0.0050182		1120.94	-0.0017191		1120.94	-0.00632957		1120.94	-0.00436776		1120.94	-0.00847652		1120.94	-0.000746894		1120.94	0.00142259
	1121.42	-0.00134822		1121.42	-0.00449941		1121.42	-0.0118812		1121.42	-0.00557665		1121.42	0.00433756		1121.42	-0.00431298		1121.42	-0.00107919		1121.42	-0.00630455		1121.42	-0.00442706		1121.42	-0.00945422		1121.42	-0.000465085		1121.42	0.00117128
	1121.9	-0.000866121		1121.9	-0.00350518		1121.9	-0.0113945		1121.9	-0.00565845		1121.9	0.00243204		1121.9	-0.00372728		1121.9	-0.000773355		1121.9	-0.00665808		1121.9	-0.00445717		1121.9	-0.0104045		1121.9	0.000224574		1121.9	0.000899825
	1122.39	-0.000841352		1122.39	-0.00269634		1122.39	-0.0107476		1122.39	-0.00593914		1122.39	0.000307195		1122.39	-0.00336758		1122.39	-0.00092144		1122.39	-0.00740509		1122.39	-0.00458086		1122.39	-0.0113822		1122.39	0.00119669		1122.39	0.00066541
	1122.87	-0.00140645		1122.87	-0.00234422		1122.87	-0.00995836		1122.87	-0.00640268		1122.87	-0.00183588		1122.87	-0.00337188		1122.87	-0.00156231		1122.87	-0.00847233		1122.87	-0.0049369		1122.87	-0.0124117		1122.87	0.00223237		1122.87	0.000452217
	1123.35	-0.00259218		1123.35	-0.00260697		1123.35	-0.00908278		1123.35	-0.00702765		1123.35	-0.0038519		1123.35	-0.00385794		1123.35	-0.00263325		1123.35	-0.00970667		1123.35	-0.00563092		1123.35	-0.0134588		1123.35	0.00307176		1123.35	0.000178928
	1123.83	-0.00429667		1123.83	-0.00345982		1123.83	-0.00820869		1123.83	-0.00778226		1123.83	-0.00564809		1123.83	-0.00485631		1123.83	-0.00396857		1123.83	-0.0109052		1123.83	-0.00669306		1123.83	-0.0144337		1123.83	0.00348203		1123.83	-0.00026572
	1124.32	-0.00631357		1124.32	-0.00470658		1124.32	-0.00743838		1124.32	-0.00862535		1124.32	-0.00717818		1124.32	-0.00629743		1124.32	-0.00534502		1124.32	-0.0118632		1124.32	-0.00806749		1124.32	-0.0152248		1124.32	0.00330304		1124.32	-0.000969116
	1124.8	-0.00840165		1124.8	-0.00604558		1124.8	-0.00687547		1124.8	-0.00950564		1124.8	-0.00840467		1124.8	-0.00802466		1124.8	-0.00654131		1124.8	-0.0124118		1124.8	-0.00963007		1124.8	-0.0157396		1124.8	0.0024693		1124.8	-0.00195079
	1125.28	-0.0103508		1125.28	-0.00716997		1125.28	-0.00661285		1125.28	-0.010359		1125.28	-0.0092785		1125.28	-0.00984015		1125.28	-0.00739134		1125.28	-0.0124305		1125.28	-0.0112217		1125.28	-0.0159282		1125.28	0.00100127		1125.28	-0.00313694
	1125.76	-0.0120197		1125.76	-0.0078507		1125.76	-0.00672353		1125.76	-0.0111035		1125.76	-0.00972929		1125.76	-0.0115422		1125.76	-0.00781217		1125.76	-0.0118493		1125.76	-0.0126656		1125.76	-0.0157945		1125.76	-0.00100604		1125.76	-0.00436008
	1126.24	-0.0133311		1126.24	-0.00800006		1126.24	-0.00723642		1126.24	-0.0116514		1126.24	-0.00970045		1126.24	-0.012957		1126.24	-0.00781998		1126.24	-0.0106634		1126.24	-0.0137862		1126.24	-0.0153859		1126.24	-0.00338395		1126.24	-0.00539382
	1126.72	-0.0142633		1126.72	-0.00769057		1126.72	-0.00811237		1126.72	-0.0119228		1126.72	-0.00919244		1126.72	-0.0139603		1126.72	-0.00752129		1126.72	-0.00895485		1126.72	-0.0144199		1126.72	-0.0147861		1126.72	-0.0058906		1126.72	-0.00600254
	1127.21	-0.0148219		1127.21	-0.00713376		1127.21	-0.00921986		1127.21	-0.0118797		1127.21	-0.00830151		1127.21	-0.0144972		1127.21	-0.00708379		1127.21	-0.00690632		1127.21	-0.0144449		1127.21	-0.0140912		1127.21	-0.00823515		1127.21	-0.00601133
	1127.69	-0.0150269		1127.69	-0.0066073		1127.69	-0.0103501		1127.69	-0.011552		1127.69	-0.00721331		1127.69	-0.0145816		1127.69	-0.00667756		1127.69	-0.00478618		1127.69	-0.0138005		1127.69	-0.0133836		1127.69	-0.0101317		1127.69	-0.00536116
	1128.17	-0.0149022		1128.17	-0.00635876		1128.17	-0.01126		1128.17	-0.0110359		1128.17	-0.00615058		1128.17	-0.0142841		1128.17	-0.0064255		1128.17	-0.00289164		1128.17	-0.0125074		1128.17	-0.0127122		1128.17	-0.0113693		1128.17	-0.00411675
	1128.65	-0.014478		1128.65	-0.00651765		1128.65	-0.0117325		1128.65	-0.0104686		1128.65	-0.00529079		1128.65	-0.0136894		1128.65	-0.00636167		1128.65	-0.00147362		1128.65	-0.0106545		1128.65	-0.0120836		1128.65	-0.011846		1128.65	-0.00243395
	1129.14	-0.0137898		1129.14	-0.00706374		1129.14	-0.0116151		1129.14	-0.00997753		1129.14	-0.00471093		1129.14	-0.0128632		1129.14	-0.00643402		1129.14	-0.000675343		1129.14	-0.00839043		1129.14	-0.0114626		1129.14	-0.0115756		1129.14	-0.000499109
	1129.62	-0.0128891		1129.62	-0.00784289		1129.62	-0.0108443		1129.62	-0.00963762		1129.62	-0.00436756		1129.62	-0.0118342		1129.62	-0.00653218		1129.62	-0.000494145		1129.62	-0.00589949		1129.62	-0.0107951		1129.62	-0.0106644		1129.62	0.00151119
	1130.1	-0.0118399		1130.1	-0.0086196		1130.1	-0.00944826		1130.1	-0.00944177		1130.1	-0.00412863		1130.1	-0.0105985		1130.1	-0.00653883		1130.1	-0.000776828		1130.1	-0.0033967		1130.1	-0.0100141		1130.1	-0.00927947		1130.1	0.00344262
	1130.58	-0.0107168		1130.58	-0.00914703		1130.58	-0.00754578		1130.58	-0.00929919		1130.58	-0.00383101		1130.58	-0.00914547		1130.58	-0.00636718		1130.58	-0.00125149		1130.58	-0.00109443		1130.58	-0.00906646		1130.58	-0.00762448		1130.58	0.00516169
	1131.06	-0.00958602		1131.06	-0.00924522		1131.06	-0.00532663		1131.06	-0.00906942		1131.06	-0.00335416		1131.06	-0.00749433		1131.06	-0.00599996		1131.06	-0.00159925		1131.06	0.000825988		1131.06	-0.00792306		1131.06	-0.0059093		1131.06	0.00654554
	1131.55	-0.00849234		1131.55	-0.00885036		1131.55	-0.00301949		1131.55	-0.00862411		1131.55	-0.0026701		1131.55	-0.00571016		1131.55	-0.00549091		1131.55	-0.00155518		1131.55	0.00225821		1131.55	-0.00659047		1131.55	-0.00431091		1131.55	0.00748318
	1132.03	-0.00745639		1132.03	-0.00802833		1132.03	-0.000849256		1132.03	-0.00790399		1132.03	-0.00185703		1132.03	-0.00390838		1132.03	-0.00494182		1132.03	-0.000992819		1132.03	0.0031847		1132.03	-0.00510931		1132.03	-0.00295973		1132.03	0.0078866
	1132.51	-0.00649571		1132.51	-0.00693342		1132.51	0.0009845		1132.51	-0.0069522		1132.51	-0.00106551		1132.51	-0.00223384		1132.51	-0.00445815		1132.51	3.97627e-05		1132.51	0.00365097		1132.51	-0.00355714		1132.51	-0.00193403		1132.51	0.00769816
	1132.99	-0.00564302		1132.99	-0.0057508		1132.99	0.00231301		1132.99	-0.0059004		1132.99	-0.000462702		1132.99	-0.000828323		1132.99	-0.00411081		1132.99	0.00135142		1132.99	0.00371743		1132.99	-0.00203407		1132.99	-0.0012801		1132.99	0.00690635
	1133.47	-0.00496498		1133.47	-0.00464525		1133.47	0.00299969		1133.47	-0.00492432		1133.47	-0.000180808		1133.47	0.000204485		1133.47	-0.00390802		1133.47	0.00267988		1133.47	0.00343256		1133.47	-0.000663631		1133.47	-0.00102376		1133.47	0.00556897
	1133.96	-0.00454853		1133.96	-0.00373155		1133.96	0.00295915		1133.96	-0.00418596		1133.96	-0.000285753		1133.96	0.00082871		1133.96	-0.00380171		1133.96	0.00377131		1133.96	0.00281963		1133.96	0.000423527		1133.96	-0.00117064		1133.96	0.0038175
	1134.44	-0.0044655		1134.44	-0.00306318		1134.44	0.0022006		1134.44	-0.00377169		1134.44	-0.000761977		1134.44	0.00109962		1134.44	-0.00369919		1134.44	0.00446442		1134.44	0.00190058		1134.44	0.001114		1134.44	-0.00168306		1134.44	0.00186118
	1134.92	-0.00471726		1134.92	-0.00264257		1134.92	0.000866092		1134.92	-0.0036621		1134.92	-0.00153041		1134.92	0.00115121		1134.92	-0.00350439		1134.92	0.00473332		1134.92	0.000720534		1134.92	0.00134115		1134.92	-0.00246166		1134.92	-5.88752e-05
	1135.4	-0.00520571		1135.4	-0.00244054		1135.4	-0.000770213		1135.4	-0.00374515		1135.4	-0.00247524		1135.4	0.00115745		1135.4	-0.00315523		1135.4	0.00468341		1135.4	-0.000631473		1135.4	0.00111168		1135.4	-0.00334759		1135.4	-0.00173339
	1135.89	-0.00574299		1135.89	-0.00243003		1135.89	-0.00236989		1135.89	-0.0038781		1135.89	-0.00349315		1135.89	0.00125042		1135.89	-0.00266068		1135.89	0.00448414		1135.89	-0.00204158		1135.89	0.000498622		1135.89	-0.00416086		1135.89	-0.00305114
	1136.37	-0.00610965		1136.37	-0.00259965		1136.37	-0.00362799		1136.37	-0.00396039		1136.37	-0.00451095		1136.37	0.00146637		1136.37	-0.00210032		1136.37	0.00427682		1136.37	-0.00339536		1136.37	-0.000386568		1136.37	-0.00475		1136.37	-0.00401909
	1136.85	-0.00611664		1136.85	-0.00295743		1136.85	-0.00435854		1136.85	-0.00398062		1136.85	-0.00548744		1136.85	0.00171612		1136.85	-0.00160199		1136.85	0.00411109		1136.85	-0.00460987		1136.85	-0.0014218		1136.85	-0.00503707		1136.85	-0.00473073
	1137.33	-0.00567343		1137.33	-0.00350505		1137.33	-0.00454046		1137.33	-0.00400869		1137.33	-0.0063854		1137.33	0.00181872		1137.33	-0.00129536		1137.33	0.00393294		1137.33	-0.005637		1137.33	-0.0024984		1137.33	-0.00503284		1137.33	-0.00529734
	1137.81	-0.00480165		1137.81	-0.0042067		1137.81	-0.00430235		1137.81	-0.00414382		1137.81	-0.00714481		1137.81	0.00157323		1137.81	-0.00126771		1137.81	0.00362477		1137.81	-0.00645338		1137.81	-0.00351222		1137.81	-0.00481767		1137.81	-0.00577909
	1138.3	-0.00363841		1138.3	-0.00496216		1138.3	-0.00387597		1138.3	-0.00443874		1138.3	-0.00766706		1138.3	0.000851219		1138.3	-0.00151638		1138.3	0.00307977		1138.3	-0.00703965		1138.3	-0.00435985		1138.3	-0.00450551		1138.3	-0.00614692
	1138.78	-0.00238242		1138.78	-0.00560818		1138.78	-0.00350393		1138.78	-0.00483521		1138.78	-0.0078327		1138.78	-0.000328201		1138.78	-0.00193878		1138.78	0.00227247		1138.78	-0.00736287		1138.78	-0.00493323		1138.78	-0.00418783		1138.78	-0.00628581
	1139.26	-0.00123424		1139.26	-0.0059543		1139.26	-0.00335548		1139.26	-0.00515696		1139.26	-0.00753653		1139.26	-0.00178266		1139.26	-0.00236034		1139.26	0.00128804		1139.26	-0.00737759		1139.26	-0.00513551		1139.26	-0.00388746		1139.26	-0.00605152
	1139.74	-0.000328897		1139.74	-0.00584899		1139.74	-0.0034708		1139.74	-0.00516148		1139.74	-0.00673492		1139.74	-0.00322887		1139.74	-0.00260074		1139.74	0.000293567		1139.74	-0.00704311		1139.74	-0.00490575		1139.74	-0.00354511		1139.74	-0.00534273
	1140.22	0.000285079		1140.22	-0.00523298		1140.22	-0.00377813		1140.22	-0.00463957		1140.22	-0.00546869		1140.22	-0.00438242		1140.22	-0.00254514		1140.22	-0.000530814		1140.22	-0.00634896		1140.22	-0.00424693		1140.22	-0.00304328		1140.22	-0.00416407
	1140.71	0.000634848		1140.71	-0.00417283		1140.71	-0.00415078		1140.71	-0.00350255		1140.71	-0.0038737		1140.71	-0.00505462		1140.71	-0.002193		1140.71	-0.00106267		1140.71	-0.00534984		1140.71	-0.00323654		1140.71	-0.0022669		1140.71	-0.00264873
	1141.19	0.000779614		1141.19	-0.00285628		1141.19	-0.00448331		1141.19	-0.00183205		1141.19	-0.00215719		1141.19	-0.00519481		1141.19	-0.00165639		1141.19	-0.00127409		1141.19	-0.00416962		1141.19	-0.00202948		1141.19	-0.0011633		1141.19	-0.00103308
	1141.67	0.000777722		1141.67	-0.00156386		1141.67	-0.00473653		1141.67	0.000115985		1141.67	-0.000570922		1141.67	-0.00489539		1141.67	-0.00113399		1141.67	-0.00123963		1141.67	-0.00300211		1141.67	-0.000833052		1141.67	0.000209491		1141.67	0.0003895
	1142.15	0.000664481		1142.15	-0.000599709		1142.15	-0.00494761		1142.15	0.00197763		1142.15	0.00064988		1142.15	-0.00434444		1142.15	-0.000837748		1142.15	-0.00109849		1142.15	-0.00206358		1142.15	0.000133286		1142.15	0.00167268		1142.15	0.00135002
	1142.63	0.000452051		1142.63	-0.000208429		1142.63	-0.00519235		1142.63	0.00338718		1142.63	0.00134387		1142.63	-0.00375937		1142.63	-0.000914067		1142.63	-0.00100399		1142.63	-0.00153451		1142.63	0.000702712		1142.63	0.00296302		1142.63	0.00168246
	1143.12	0.000146941		1143.12	-0.000490405		1143.12	-0.00552159		1143.12	0.00410376		1143.12	0.00148023		1143.12	-0.00330422		1143.12	-0.0013863		1143.12	-0.00106303		1143.12	-0.00148775		1143.12	0.000815299		1143.12	0.00381593		1143.12	0.00137282
	1143.6	-0.000238566		1143.6	-0.00137755		1143.6	-0.00591635		1143.6	0.00408453		1143.6	0.00115546		1143.6	-0.00304996		1143.6	-0.00215423		1143.6	-0.00130583		1143.6	-0.00186858		1143.6	0.000537402		1143.6	0.00404633		1143.6	0.000550042
	1144.08	-0.000683944		1144.08	-0.0026565		1144.08	-0.00627804		1144.08	0.00347274		1144.08	0.000553293		1144.08	-0.00296605		1144.08	-0.00304045		1144.08	-0.00168537		1144.08	-0.00251595		1144.08	2.79992e-05		1144.08	0.00360456		1144.08	-0.000570624
	1144.56	-0.00115891		1144.56	-0.00404335		1144.56	-0.00646118		1144.56	0.00252215		1144.56	-0.000128806		1144.56	-0.00296193		1144.56	-0.00386704		1144.56	-0.00210863		1144.56	-0.00323048		1144.56	-0.000518404		1144.56	0.00257664		1144.56	-0.00176164
	1145.05	-0.00163539		1145.05	-0.00525324		1145.05	-0.00633257		1145.05	0.0015041		1145.05	-0.000738526		1145.05	-0.00293396		1145.05	-0.00450705		1145.05	-0.00246473		1145.05	-0.00383183		1145.05	-0.000938997		1145.05	0.0011545		1145.05	-0.00283034
	1145.53	-0.00209253		1145.53	-0.00607449		1145.53	-0.00583574		1145.53	0.000629141		1145.53	-0.00121825		1145.53	-0.00280993		1145.53	-0.00492603		1145.53	-0.00266104		1145.53	-0.00421628		1145.53	-0.00115018		1145.53	-0.000418944		1145.53	-0.00365152
	1146.01	-0.00252007		1146.01	-0.00641116		1146.01	-0.00503071		1146.01	7.32268e-06		1146.01	-0.00160469		1146.01	-0.00256968		1146.01	-0.00516449		1146.01	-0.00264095		1146.01	-0.00437087		1146.01	-0.00117338		1146.01	-0.00190727		1146.01	-0.00416982
	1146.49	-0.00292241		1146.49	-0.00631366		1146.49	-0.00409039		1146.49	-0.000362104		1146.49	-0.00201263		1146.49	-0.00224785		1146.49	-0.00530919		1146.49	-0.00239814		1146.49	-0.00437402		1146.49	-0.00112768		1146.49	-0.00313921		1146.49	-0.00439882
	1146.97	-0.00331931		1146.97	-0.00595878		1146.97	-0.00325121		1146.97	-0.000569002		1146.97	-0.00257732		1146.97	-0.00191186		1146.97	-0.0054399		1146.97	-0.00197895		1146.97	-0.00434952		1146.97	-0.00118845		1146.97	-0.00404903		1146.97	-0.0044106
	1147.46	-0.00374663		1147.46	-0.00559765		1147.46	-0.0027272		1147.46	-0.000747556		1147.46	-0.0033994		1147.46	-0.00163833		1147.46	-0.00559369		1147.46	-0.00147461		1147.46	-0.00442008		1147.46	-0.00152368		1147.46	-0.00468294		1147.46	-0.00431179
	1147.94	-0.00425284		1147.94	-0.00547226		1147.94	-0.00264813		1147.94	-0.00103659		1147.94	-0.00450141		1147.94	-0.0014858		1147.94	-0.00575512		1147.94	-0.0010071		1147.94	-0.00466259		1147.94	-0.00223829		1147.94	-0.00516203		1147.94	-0.00422294
	1148.42	-0.00489035		1148.42	-0.00574655		1148.42	-0.0030313		1148.42	-0.00154451		1148.42	-0.00582051		1148.42	-0.00148392		1148.42	-0.00587968		1148.42	-0.000706737		1148.42	-0.00509435		1148.42	-0.00333388		1148.42	-0.00562365		1148.42	-0.00425077
	1148.9	-0.00570094		1148.9	-0.00646278		1148.9	-0.00380299		1148.9	-0.00233223		1148.9	-0.00722009		1148.9	-0.00162751		1148.9	-0.00592283		1148.9	-0.000686591		1148.9	-0.00567144		1148.9	-0.00470267		1148.9	-0.00616081		1148.9	-0.00446524
	1149.38	-0.00669299		1149.38	-0.00752816		1149.38	-0.00482859		1149.38	-0.00339986		1149.38	-0.00852363		1149.38	-0.00187115		1149.38	-0.00587295		1149.38	-0.00101298		1149.38	-0.00630723		1149.38	-0.00613647		1149.38	-0.00677866		1149.38	-0.00488255
	1149.87	-0.00782476		1149.87	-0.00873399		1149.87	-0.00595639		1149.87	-0.00467511		1149.87	-0.00954716		1149.87	-0.00213253		1149.87	-0.00575227		1149.87	-0.00166896		1149.87	-0.00688751		1149.87	-0.00736603		1149.87	-0.00738105		1149.87	-0.00545233
	1150.35	-0.00899169		1150.35	-0.00980717		1150.35	-0.00704692		1150.35	-0.00601561		1150.35	-0.0101393		1150.35	-0.00230079		1150.35	-0.00559804		1150.35	-0.00253885		1150.35	-0.00729377		1150.35	-0.00812431		1150.35	-0.0077944		1150.35	-0.00606119
	1150.83	-0.0100539		1150.83	-0.010491		1150.83	-0.00799893		1150.83	-0.00723512		1150.83	-0.0102107		1150.83	-0.00226387		1150.83	-0.00543119		1150.83	-0.00342757		1150.83	-0.00742675		1150.83	-0.00822881		1150.83	-0.0078258		1150.83	-0.00656671
	1151.31	-0.010869		1151.31	-0.010622		1151.31	-0.00875367		1151.31	-0.0081458		1151.31	-0.0097416		1151.31	-0.00194656		1151.31	-0.00522925		1151.31	-0.00411356		1151.31	-0.00722752		1151.31	-0.00764327		1151.31	-0.00733097		1151.31	-0.00683757
	1151.8	-0.0113367		1151.8	-0.0101622		1151.8	-0.00929329		1151.8	-0.00860829		1151.8	-0.00876896		1151.8	-0.00133913		1151.8	-0.00492662		1151.8	-0.00442214		1151.8	-0.00668568		1151.8	-0.00650012		1151.8	-0.00626481		1151.8	-0.006797
	1152.28	-0.0114184		1152.28	-0.00919559		1152.28	-0.00962378		1152.28	-0.0085596		1152.28	-0.00737098		1152.28	-0.000512381		1152.28	-0.0044433		1152.28	-0.00427662		1152.28	-0.00584562		1152.28	-0.00507116		1152.28	-0.00469782		1152.28	-0.00643937
	1152.76	-0.0111462		1152.76	-0.00788799		1152.76	-0.00976946		1152.76	-0.00802664		1152.76	-0.0056576		1152.76	0.000386747		1152.76	-0.00373112		1152.76	-0.00372054		1152.76	-0.00479726		1152.76	-0.00371348		1152.76	-0.00280667		1152.76	-0.00582401
	1153.24	-0.0106046		1153.24	-0.0064395		1153.24	-0.00976444		1153.24	-0.00711629		1153.24	-0.00377783		1153.24	0.00116513		1153.24	-0.00282182		1153.24	-0.00290487		1153.24	-0.00367024		1153.24	-0.00277402		1153.24	-0.000835995		1153.24	-0.00505561
	1153.72	-0.00990697		1153.72	-0.00503812		1153.72	-0.00965249		1153.72	-0.00598917		1153.72	-0.0019176		1153.72	0.00163037		1153.72	-0.00183275		1153.72	-0.00203987		1153.72	-0.00260555		1153.72	-0.00250143		1153.72	0.000952554		1153.72	-0.00425018
	1154.21	-0.00916237		1154.21	-0.00382398		1154.21	-0.00947915		1154.21	-0.00482157		1154.21	-0.000286217		1154.21	0.00164354		1154.21	-0.000948915		1154.21	-0.00132965		1154.21	-0.00172916		1154.21	-0.00295808		1154.21	0.00233869		1154.21	-0.00350554
	1154.69	-0.00844948		1154.69	-0.00287185		1154.69	-0.00928667		1154.69	-0.00376558		1154.69	0.000931402		1154.69	0.00116144		1154.69	-0.000357336		1154.69	-0.00090547		1154.69	-0.00111832		1154.69	-0.00398892		1154.69	0.00319524		1154.69	-0.00288018
	1155.17	-0.00780208		1155.17	-0.00220272		1155.17	-0.0091019		1155.17	-0.00291869		1155.17	0.00161657		1155.17	0.000239128		1155.17	-0.000178589		1155.17	-0.000790058		1155.17	-0.000788768		1155.17	-0.00526588		1155.17	0.00350327		1155.17	-0.00238891
	1155.65	-0.00722149		1155.65	-0.00180661		1155.65	-0.0089396		1155.65	-0.00232758		1155.65	0.00174925		1155.65	-0.000996753		1155.65	-0.000428146		1155.65	-0.000911686		1155.65	-0.00070462		1155.65	-0.00639344		1155.65	0.00333355		1155.65	-0.00201939
	1156.13	-0.00669335		1156.13	-0.00167372		1156.13	-0.00880624		1156.13	-0.00200455		1156.13	0.00140144		1156.13	-0.00239082		1156.13	-0.00102082		1156.13	-0.0011476		1156.13	-0.000810497		1156.13	-0.00702446		1156.13	0.00280262		1156.13	-0.00175385
	1156.62	-0.00621889		1156.62	-0.00180727		1156.62	-0.00871811		1156.62	-0.00195553		1156.62	0.000705101		1156.62	-0.00379304		1156.62	-0.00181047		1156.62	-0.00138405		1156.62	-0.00105682		1156.62	-0.00695918		1156.62	0.00203268		1156.62	-0.00158218
	1157.1	-0.00582767		1157.1	-0.00221723		1157.1	-0.00870564		1157.1	-0.00219135		1157.1	-0.000198229		1157.1	-0.00507781		1157.1	-0.00264962		1157.1	-0.0015633		1157.1	-0.00142058		1157.1	-0.00619612		1157.1	0.00113543		1157.1	-0.00151166
	1157.58	-0.00557838		1157.58	-0.0028919		1157.58	-0.00881257		1157.58	-0.00271541		1157.58	-0.00119681		1157.58	-0.00615156		1157.58	-0.00343454		1157.58	-0.00170405		1157.58	-0.00189316		1157.58	-0.00494218		1157.58	0.000206441		1157.58	-0.00155838
	1158.06	-0.00554132		1158.06	-0.00377415		1158.06	-0.00907201		1158.06	-0.00350045		1158.06	-0.00224508		1158.06	-0.00695872		1158.06	-0.00413217		1158.06	-0.00189108		1158.06	-0.00246825		1158.06	-0.00355313		1158.06	-0.000673655		1158.06	-0.0017387
	1158.55	-0.00577016		1158.55	-0.00474538		1158.55	-0.00947672		1158.55	-0.00446937		1158.55	-0.00335765		1158.55	-0.00748072		1158.55	-0.00476914		1158.55	-0.00223631		1158.55	-0.00310862		1158.55	-0.0024182		1158.55	-0.00143673		1158.55	-0.00205811
	1159.03	-0.00628006		1159.03	-0.00564766		1159.03	-0.00996076		1159.03	-0.00549679		1159.03	-0.00458273		1159.03	-0.00773614		1159.03	-0.00539529		1159.03	-0.00282817		1159.03	-0.00374068		1159.03	-0.00182608		1159.03	-0.00203608		1159.03	-0.00251082
	1159.51	-0.00703965		1159.51	-0.0063088		1159.51	-0.0104		1159.51	-0.00643552		1159.51	-0.0059458		1159.51	-0.00776599		1159.51	-0.00603666		1159.51	-0.00369022		1159.51	-0.00425628		1159.51	-0.00187353		1159.51	-0.0024497		1159.51	-0.00308009
	1159.99	-0.0079677		1159.99	-0.00658031		1159.99	-0.0106361		1159.99	-0.00714641		1159.99	-0.00739965		1159.99	-0.00761536		1159.99	-0.00665935		1159.99	-0.00475839		1159.99	-0.00453748		1159.99	-0.0024441		1159.99	-0.00267751		1159.99	-0.00373309
	1160.47	-0.00894366		1160.47	-0.00636043		1160.47	-0.0105224		1160.47	-0.00752696		1160.47	-0.00879831		1160.47	-0.00731377		1160.47	-0.0071642		1160.47	-0.00587824		1160.47	-0.0044798		1160.47	-0.00326285		1160.47	-0.00272927		1160.47	-0.00440728
	1160.96	-0.00981527		1160.96	-0.00562035		1160.96	-0.00996727		1160.96	-0.00752979		1160.96	-0.00991535		1160.96	-0.00685952		1160.96	-0.00741857		1160.96	-0.00683164		1160.96	-0.00402612		1160.96	-0.00398255		1160.96	-0.00260838		1160.96	-0.00500268
	1161.44	-0.0104225		1161.44	-0.00440987		1161.44	-0.00897738		1161.44	-0.00716433		1161.44	-0.0105006		1161.44	-0.00622225		1161.44	-0.0072995		1161.44	-0.00737811		1161.44	-0.00318151		1161.44	-0.00429332		1161.44	-0.00230033		1161.44	-0.00537811
	1161.92	-0.0106266		1161.92	-0.00286089		1161.92	-0.0076642		1161.92	-0.00648527		1161.92	-0.0103697		1161.92	-0.00535573		1161.92	-0.00675015		1161.92	-0.00731853		1161.92	-0.0020249		1161.92	-0.00401515		1161.92	-0.00176781		1161.92	-0.00538083
	1162.4	-0.0103467		1162.4	-0.00116079		1162.4	-0.00621843		1162.4	-0.0055705		1162.4	-0.00947873		1162.4	-0.00422869		1162.4	-0.0058058		1162.4	-0.00655571		1162.4	-0.000685698		1162.4	-0.00314714		1162.4	-0.000964421		1162.4	-0.00489392
	1162.88	-0.0095799		1162.88	0.000489201		1162.88	-0.00484071		1162.88	-0.00449174		1162.88	-0.00795065		1162.88	-0.0028553		1162.88	-0.00458532		1162.88	-0.00512647		1162.88	0.00068635		1162.88	-0.00185492		1162.88	0.000137495		1162.88	-0.00388467
	1163.37	-0.00840532		1163.37	0.00191499		1163.37	-0.00368766		1163.37	-0.0033098		1163.37	-0.00603577		1163.37	-0.00131756		1163.37	-0.00324933		1163.37	-0.00319934		1163.37	0.00195346		1163.37	-0.000406696		1163.37	0.00151591		1163.37	-0.00243932
	1163.85	-0.00696071		1163.85	0.00299335		1163.85	-0.00283499		1163.85	-0.0020771		1163.85	-0.00403505		1163.85	0.000237437		1163.85	-0.00195135		1163.85	-0.00103394		1163.85	0.00300242		1163.85	0.000914368		1163.85	0.003077		1163.85	-0.000756817
	1164.33	-0.00541853		1164.33	0.00365899		1164.33	-0.00229251		1164.33	-0.000862087		1164.33	-0.00222356		1164.33	0.0016174		1164.33	-0.000806958		1164.33	0.00106165		1164.33	0.00374614		1164.33	0.00187206		1164.33	0.0046462		1164.33	0.000884652
	1164.81	-0.00395927		1164.81	0.0038981		1164.81	-0.00203113		1164.81	0.000231934		1164.81	-0.000798062		1164.81	0.00262551		1164.81	0.000111842		1164.81	0.00278341		1164.81	0.00411761		1164.81	0.00232327		1164.81	0.00598759		1164.81	0.00218125
	1165.3	-0.00274326		1165.3	0.0037433		1165.3	-0.00201985		1165.3	0.00107205		1165.3	0.00015178		1165.3	0.00311694		1165.3	0.000772445		1165.3	0.00388593		1165.3	0.00407814		1165.3	0.00223407		1165.3	0.00685558		1165.3	0.0028852
	1165.78	-0.00188326		1165.78	0.00326141		1165.78	-0.00224251		1165.78	0.00152419		1165.78	0.000634881		1165.78	0.00304507		1165.78	0.00116772		1165.78	0.0042343		1165.78	0.00362638		1165.78	0.00167833		1165.78	0.00706399		1165.78	0.00287806
	1166.26	-0.0014326		1166.26	0.00253641		1166.26	-0.00269993		1166.26	0.00149559		1166.26	0.000725844		1166.26	0.00247759		1166.26	0.0013012		1166.26	0.0038299		1166.26	0.00281056		1166.26	0.000807531		1166.26	0.00654692		1166.26	0.00220709
	1166.74	-0.00138154		1166.74	0.0016477		1166.74	-0.00338523		1166.74	0.000974803		1166.74	0.000518891		1166.74	0.00156545		1166.74	0.00118317		1166.74	0.00280072		1166.74	0.00172184		1166.74	-0.000190777		1166.74	0.00538036		1166.74	0.001066
	1167.22	-0.00167986		1167.22	0.000658973		1167.22	-0.00426334		1167.22	3.46265e-05		1167.22	8.8742e-05		1167.22	0.000483529		1167.22	0.000828943		1167.22	0.00135285		1167.22	0.000476364		1167.22	-0.0011406		1167.22	0.00374978		1167.22	-0.000278502
	1167.71	-0.00224801		1167.71	-0.000378325		1167.71	-0.00524719		1167.71	-0.00117741		1167.71	-0.000516749		1167.71	-0.000623929		1167.71	0.000269065		1167.71	-0.000279131		1167.71	-0.000809439		1167.71	-0.00190454		1167.71	0.00189369		1167.71	-0.00156406
	1168.19	-0.00299563		1168.19	-0.00141051		1168.19	-0.00620229		1168.19	-0.00247632		1168.19	-0.00125929		1168.19	-0.00166784		1168.19	-0.000438904		1168.19	-0.00187059		1168.19	-0.00203298		1168.19	-0.00240074		1168.19	4.38054e-05		1168.19	-0.00258941
	1168.67	-0.00381321		1168.67	-0.00236162		1168.67	-0.00696404		1168.67	-0.00366558		1168.67	-0.00207661		1168.67	-0.00260515		1168.67	-0.00120798		1168.67	-0.00322456		1168.67	-0.00311454		1168.67	-0.00259718		1168.67	-0.00160833		1168.67	-0.00323795
	1169.15	-0.00457653		1169.15	-0.00312997		1169.15	-0.00737984		1169.15	-0.00457128		1169.15	-0.00285467		1169.15	-0.00340785		1169.15	-0.00192489		1169.15	-0.00418114		1169.15	-0.00399493		1169.15	-0.00251157		1169.15	-0.00293208		1169.15	-0.00347267
	1169.63	-0.0051566		1169.63	-0.00360765		1169.63	-0.00735971		1169.63	-0.00507071		1169.63	-0.00343882		1169.63	-0.00404224		1169.63	-0.00247926		1169.63	-0.00463947		1169.63	-0.0046361		1169.63	-0.00220134		1169.63	-0.00386595		1169.63	-0.00332138
	1170.12	-0.00545089		1170.12	-0.00371772		1170.12	-0.00691033		1170.12	-0.00511328		1170.12	-0.00366594		1170.12	-0.00445914		1170.12	-0.00279288		1170.12	-0.00457102		1170.12	-0.00501739		1170.12	-0.00174709		1170.12	-0.00440932		1170.12	-0.00285414
	1170.6	-0.00541591		1170.6	-0.00346084		1170.6	-0.00613983		1170.6	-0.00473135		1170.6	-0.0034329		1170.6	-0.00462253		1170.6	-0.00285661		1170.6	-0.00403797		1170.6	-0.00514127		1170.6	-0.00123966		1170.6	-0.0046181		1170.6	-0.00216329
	1171.08	-0.00508836		1171.08	-0.0029257		1171.08	-0.00522427		1171.08	-0.00403078		1171.08	-0.00273691		1171.08	-0.00453702		1171.08	-0.00273128		1171.08	-0.0031772		1171.08	-0.00502669		1171.08	-0.000763069		1171.08	-0.0045764		1171.08	-0.00134957
	1171.56	-0.00457299		1171.56	-0.00227831		1171.56	-0.0043531		1171.56	-0.00316855		1171.56	-0.00169306		1171.56	-0.00427016		1171.56	-0.00253005		1171.56	-0.00217203		1171.56	-0.00471316		1171.56	-0.000385542		1171.56	-0.00437789		1171.56	-0.000511322
	1172.05	-0.00401745		1172.05	-0.00171633		1172.05	-0.00368319		1172.05	-0.00232877		1172.05	-0.000513274		1172.05	-0.0039486		1172.05	-0.00238314		1172.05	-0.00120705		1172.05	-0.00425182		1172.05	-0.000162492		1172.05	-0.00410565		1172.05	0.0002627
	1172.53	-0.0035648		1172.53	-0.00141556		1172.53	-0.00330182		1172.53	-0.00168923		1172.53	0.000538895		1172.53	-0.00372146		1172.53	-0.00239873		1172.53	-0.000425266		1172.53	-0.00370106		1172.53	-0.000134238		1172.53	-0.00381695		1172.53	0.000904108
	1173.01	-0.00330734		1173.01	-0.00146556		1173.01	-0.00321009		1173.01	-0.00138204		1173.01	0.0012247		1173.01	-0.00370142		1173.01	-0.00262116		1173.01	0.000118039		1173.01	-0.00310944		1173.01	-0.00031797		1173.01	-0.00352914		1173.01	0.00138492
	1173.49	-0.00326265		1173.49	-0.0018409		1173.49	-0.00332694		1173.49	-0.00145288		1173.49	0.00139619		1173.49	-0.0039111		1173.49	-0.00301603		1173.49	0.00047036		1173.49	-0.00250505		1173.49	-0.000695986		1173.49	-0.00322151		1173.49	0.00172713
	1173.97	-0.00336721		1173.97	-0.00239642		1173.97	-0.00350922		1173.97	-0.00183252		1173.97	0.00105255		1173.97	-0.00425215		1173.97	-0.0034709		1173.97	0.000763715		1173.97	-0.00187943		1173.97	-0.00120183		1173.97	-0.00284098		1173.97	0.00199593
	1174.46	-0.00351386		1174.46	-0.00292573		1174.46	-0.00359405		1174.46	-0.00234963		1174.46	0.000332296		1174.46	-0.00454056		1174.46	-0.00383722		1174.46	0.00115244		1174.46	-0.00119681		1174.46	-0.0017221		1174.46	-0.00232999		1174.46	0.00226857
	1174.94	-0.00360588		1174.94	-0.00323532		1174.94	-0.00344542		1174.94	-0.00278333		1174.94	-0.000542992		1174.94	-0.00457863		1174.94	-0.00397707		1174.94	0.00173548		1174.94	-0.000417917		1174.94	-0.00211443		1174.94	-0.00165751		1174.94	0.00258878
	1175.42	-0.0035973		1175.42	-0.00321493		1175.42	-0.00298606		1175.42	-0.00293432		1175.42	-0.00135344		1175.42	-0.00424463		1175.42	-0.0038115		1175.42	0.00249392		1175.42	0.000463395		1175.42	-0.00223879		1175.42	-0.000848892		1175.42	0.00293347
	1175.9	-0.00350978		1175.9	-0.00286938		1175.9	-0.00222003		1175.9	-0.00269005		1175.9	-0.00194933		1175.9	-0.00355294		1175.9	-0.00334154		1175.9	0.00327629		1175.9	0.00139287		1175.9	-0.00200165		1175.9	3.54536e-06		1175.9	0.00320743
	1176.38	-0.00341252		1176.38	-0.00231552		1176.38	-0.0012316		1176.38	-0.00206576		1176.38	-0.00229152		1176.38	-0.00266233		1176.38	-0.00265482		1176.38	0.00383294		1176.38	0.00224596		1176.38	-0.0013864		1176.38	0.000755516		1176.38	0.00327476
	1176.87	-0.00338569		1176.87	-0.00173837		1176.87	-0.000177132		1176.87	-0.00120732		1176.87	-0.00244519		1176.87	-0.00183341		1176.87	-0.00189985		1176.87	0.00389736		1176.87	0.00285652		1176.87	-0.000482495		1176.87	0.00124796		1176.87	0.00301554
	1177.35	-0.00348073		1177.35	-0.00133381		1177.35	0.000751168		1177.35	-0.0003529		1177.35	-0.00254596		1177.35	-0.0013393		1177.35	-0.00124719		1177.35	0.00328611		1177.35	0.00306696		1177.35	0.000524232		1177.35	0.00135747		1177.35	0.0023857
	1177.83	-0.00370119		1177.83	-0.00124637		1177.83	0.00136661		1177.83	0.000236675		1177.83	-0.00274001		1177.83	-0.00136612		1177.83	-0.000839434		1177.83	0.0019746		1177.83	0.00279288		1177.83	0.0013934		1177.83	0.00104089		1177.83	0.00144712
	1178.31	-0.00400941		1178.31	-0.00153229		1178.31	0.00153855		1178.31	0.000359686		1178.31	-0.00313082		1178.31	-0.00194871		1178.31	-0.000751658		1178.31	0.000114029		1178.31	0.00206181		1178.31	0.00189985		1178.31	0.000347118		1178.31	0.000351297
	1178.8	-0.00435556		1178.8	-0.00215492		1178.8	0.00121802		1178.8	-7.76592e-05		1178.8	-0.00374679		1178.8	-0.00297194		1178.8	-0.000975794		1178.8	-0.00202206		1178.8	0.00100834		1178.8	0.00189575		1178.8	-0.000608875		1178.8	-0.000723442
	1179.28	-0.00470422		1179.28	-0.0030106		1179.28	0.000449265		1179.28	-0.00104449		1179.28	-0.0045424		1179.28	-0.00422183		1179.28	-0.00143033		1179.28	-0.00411967		1179.28	-0.000168785		1179.28	0.00135534		1179.28	-0.00169088		1179.28	-0.00163622
	1179.76	-0.00504559		1179.76	-0.0039618		1179.76	-0.000644277		1179.76	-0.00240555		1179.76	-0.00541791		1179.76	-0.00546463		1179.76	-0.00198476		1179.76	-0.00590354		1179.76	-0.00126001		1179.76	0.000370995		1179.76	-0.0027837		1179.76	-0.00232824
	1180.24	-0.00538489		1180.24	-0.00487135		1180.24	-0.00188309		1180.24	-0.0039639		1180.24	-0.00625772		1180.24	-0.00651504		1180.24	-0.00249711		1180.24	-0.00719285		1180.24	-0.00210553		1180.24	-0.000875049		1180.24	-0.00381715		1180.24	-0.00283393
	1180.72	-0.00571846		1180.72	-0.00562964		1180.72	-0.00307239		1180.72	-0.00550259		1180.72	-0.00695967		1180.72	-0.00727959		1180.72	-0.00284753		1180.72	-0.00792573		1180.72	-0.00262755		1180.72	-0.00217249		1180.72	-0.00476442		1180.72	-0.0032516
	1181.2	-0.00601522		1181.2	-0.00617841		1181.2	-0.00404854		1181.2	-0.00683431		1181.2	-0.00746528		1181.2	-0.00776725		1181.2	-0.00297217		1181.2	-0.0081577		1181.2	-0.00284371		1181.2	-0.00334742		1181.2	-0.00562467		1181.2	-0.00369104
	1181.69	-0.00621951		1181.69	-0.0065233		1181.69	-0.00472352		1181.69	-0.00783377		1181.69	-0.00776293		1181.69	-0.00806317		1181.69	-0.00288308		1181.69	-0.00803207		1181.69	-0.00284325		1181.69	-0.00431448		1181.69	-0.00639752		1181.69	-0.00422222
	1182.17	-0.00627523		1182.17	-0.00673472		1182.17	-0.00510804		1182.17	-0.00845559		1182.17	-0.00788356		1182.17	-0.00828581		1182.17	-0.0026669		1182.17	-0.00773578		1182.17	-0.00274932		1182.17	-0.0050878		1182.17	-0.00706312		1182.17	-0.00484871
	1182.65	-0.00616489		1182.65	-0.00692572		1182.65	-0.00530483		1182.65	-0.0087284		1182.65	-0.00787699		1182.65	-0.00853666		1182.65	-0.00246239		1182.65	-0.0074516		1182.65	-0.00267303		1182.65	-0.00575283		1182.65	-0.00757991		1182.65	-0.00552042
	1183.13	-0.00593554		1183.13	-0.0072241		1183.13	-0.00547334		1183.13	-0.00873415		1183.13	-0.0077957		1183.13	-0.00887182		1183.13	-0.00242572		1183.13	-0.00732547		1183.13	-0.00269575		1183.13	-0.00640983		1183.13	-0.00790077		1183.13	-0.00617152
	1183.62	-0.00569596		1183.62	-0.00772982		1183.62	-0.00577807		1183.62	-0.00857964		1183.62	-0.00767898		1183.62	-0.00928622		1183.62	-0.00268212		1183.62	-0.00744303		1183.62	-0.0028576		1183.62	-0.0071201		1183.62	-0.00799056		1183.62	-0.00675097
	1184.1	-0.00558447		1184.1	-0.00847996		1184.1	-0.00633698		1184.1	-0.00837298		1184.1	-0.00755555		1184.1	-0.00972116		1184.1	-0.00329267		1184.1	-0.00781965		1184.1	-0.00317303		1184.1	-0.00787383		1184.1	-0.00784741		1184.1	-0.00724365
	1184.58	-0.00571323		1184.58	-0.00942099		1184.58	-0.00717831		1184.58	-0.00819627		1184.58	-0.00744258		1184.58	-0.0100751		1184.58	-0.00421796		1184.58	-0.00839187		1184.58	-0.00363282		1184.58	-0.00859377		1184.58	-0.00750876		1184.58	-0.00765821
	1185.06	-0.0061071		1185.06	-0.0104094		1185.06	-0.00821789		1185.06	-0.00808177		1185.06	-0.00734915		1185.06	-0.0102301		1185.06	-0.00531619		1185.06	-0.00902139		1185.06	-0.00420847		1185.06	-0.00916494		1185.06	-0.00704213		1185.06	-0.00799691
	1185.55	-0.00667808		1185.55	-0.0112423		1185.55	-0.00927389		1185.55	-0.00799824		1185.55	-0.00726992		1185.55	-0.0100767		1185.55	-0.00636875		1185.55	-0.00952149		1185.55	-0.00484622		1185.55	-0.00947964		1185.55	-0.00652173		1185.55	-0.00822878
	1186.03	-0.00724401		1186.03	-0.01172		1186.03	-0.0101137		1186.03	-0.00785447		1186.03	-0.00718662		1186.03	-0.00954933		1186.03	-0.007142		1186.03	-0.00970476		1186.03	-0.00546532		1186.03	-0.00947685		1186.03	-0.00600153		1186.03	-0.00827612
	1186.51	-0.00759528		1186.51	-0.0117028		1186.51	-0.0105202		1186.51	-0.0075294		1186.51	-0.00706149		1186.51	-0.0086463		1186.51	-0.00745385		1186.51	-0.00943979		1186.51	-0.00596424		1186.51	-0.0091564		1186.51	-0.00549997		1186.51	-0.00803484
	1186.99	-0.00757183		1186.99	-0.011155		1186.99	-0.0103505		1186.99	-0.00691669		1186.99	-0.00684693		1186.99	-0.00744137		1186.99	-0.00722889		1186.99	-0.00869375		1186.99	-0.00624263		1186.99	-0.00856502		1186.99	-0.00500288		1186.99	-0.00741688
	1187.47	-0.00712378		1187.47	-0.0101512		1187.47	-0.00957974		1187.47	-0.0059711		1187.47	-0.00649317		1187.47	-0.00607606		1187.47	-0.00651703		1187.47	-0.00754842		1187.47	-0.00622594		1187.47	-0.00777441		1187.47	-0.00448495		1187.47	-0.00639468
	1187.95	-0.00632656		1187.95	-0.00885789		1187.95	-0.00831015		1187.95	-0.00474348		1187.95	-0.00596983		1187.95	-0.00473306		1187.95	-0.00548724		1187.95	-0.00618443		1187.95	-0.00589746		1187.95	-0.00685796		1187.95	-0.00393363		1187.95	-0.00503704
	1188.44	-0.00535517		1188.44	-0.0074857		1188.44	-0.00675955		1188.44	-0.00338247		1188.44	-0.00527606		1188.44	-0.00359293		1188.44	-0.00437963		1188.44	-0.00482937		1188.44	-0.00531161		1188.44	-0.00588131		1188.44	-0.00336531		1188.44	-0.00350722
	1188.92	-0.00441706		1188.92	-0.00623267		1188.92	-0.00520522		1188.92	-0.00209573		1188.92	-0.00444746		1188.92	-0.00278067		1188.92	-0.00343829		1188.92	-0.0036822		1188.92	-0.0045885		1188.92	-0.00489883		1188.92	-0.00282284		1188.92	-0.00202226
	1189.4	-0.0036823		1189.4	-0.00523252		1189.4	-0.00391373		1189.4	-0.0010861		1189.4	-0.00354692		1189.4	-0.00232758		1189.4	-0.0028392		1189.4	-0.00284799		1189.4	-0.00387938		1189.4	-0.00395836		1189.4	-0.00236044		1189.4	-0.000790819
	1189.88	-0.00323259		1189.88	-0.00453636		1189.88	-0.00306976		1189.88	-0.00048223		1189.88	-0.00265008		1189.88	-0.00216837		1189.88	-0.00264909		1189.88	-0.00230929		1189.88	-0.00332102		1189.88	-0.003102		1189.88	-0.00201959		1189.88	5.07974e-05
	1190.37	-0.0030569		1190.37	-0.00411865		1190.37	-0.00273596		1190.37	-0.000301779		1190.37	-0.00182427		1190.37	-0.00217229		1190.37	-0.0028181		1190.37	-0.00194904		1190.37	-0.00299224		1190.37	-0.00236403		1190.37	-0.00181295		1190.37	0.00046638
	1190.85	-0.00308322		1190.85	-0.00391423		1190.85	-0.00285319		1190.85	-0.000454427		1190.85	-0.00112173		1190.85	-0.00219636		1190.85	-0.00321713		1190.85	-0.00161348		1190.85	-0.00289973		1190.85	-0.00176441		1190.85	-0.00172161		1190.85	0.000511924
	1191.33	-0.00322802		1191.33	-0.00385239		1191.33	-0.00327459		1191.33	-0.000782252		1191.33	-0.000577076		1191.33	-0.00213665		1191.33	-0.0036844		1191.33	-0.00118029		1191.33	-0.00298201		1191.33	-0.00130709		1191.33	-0.00170395		1191.33	0.000301757
	1191.81	-0.0034284		1191.81	-0.00387837		1191.81	-0.00381051		1191.81	-0.00111482		1191.81	-0.000212172		1191.81	-0.00195547		1191.81	-0.00407437		1191.81	-0.000609867		1191.81	-0.00313829		1191.81	-0.000976753		1191.81	-0.00170718		1191.81	-2.90907e-05
	1192.29	-0.00365737		1192.29	-0.00395589		1192.29	-0.00428309		1192.29	-0.00132093		1192.29	-3.76386e-05		1192.29	-0.00168464		1192.29	-0.0042865		1192.29	4.3474e-05		1192.29	-0.00325946		1192.29	-0.000749276		1192.29	-0.00168279		1192.29	-0.000355317
	1192.78	-0.00390818		1192.78	-0.00405796		1192.78	-0.00456436		1192.78	-0.00134178		1192.78	-5.26468e-05		1192.78	-0.00139905		1192.78	-0.00427774		1192.78	0.000661129		1192.78	-0.00326367		1192.78	-0.000599709		1192.78	-0.00159413		1192.78	-0.000575951
	1193.26	-0.00417362		1193.26	-0.00415593		1193.26	-0.00460351		1193.26	-0.00119724		1193.26	-0.000241513		1193.26	-0.00117956		1193.26	-0.0040573		1193.26	0.00111669		1193.26	-0.0031149		1193.26	-0.000517577		1193.26	-0.00142279		1193.26	-0.000622738
	1193.74	-0.00442552		1193.74	-0.00422019		1193.74	-0.00442152		1193.74	-0.000960024		1193.74	-0.000575852		1193.74	-0.00107873		1193.74	-0.00366841		1193.74	0.00133384		1193.74	-0.00282741		1193.74	-0.000508575		1193.74	-0.00117212		1193.74	-0.000461577
	1194.22	-0.00461597		1194.22	-0.00422859		1194.22	-0.00408957		1194.22	-0.000720829		1194.22	-0.00101603		1194.22	-0.00111013		1194.22	-0.00317283		1194.22	0.00130957		1194.22	-0.00245296		1194.22	-0.000592298		1194.22	-0.000867245		1194.22	-9.68069e-05
	1194.7	-0.00469304		1194.7	-0.00418593		1194.7	-0.00369807		1194.7	-0.000559207		1194.7	-0.00152368		1194.7	-0.00125939		1194.7	-0.00264158		1194.7	0.00110055		1194.7	-0.00206896		1194.7	-0.000781657		1194.7	-0.000559042		1194.7	0.000422034
	1195.19	-0.00462492		1195.19	-0.00413578		1195.19	-0.00333401		1195.19	-0.000530185		1195.19	-0.00206622		1195.19	-0.00150482		1195.19	-0.00215518		1195.19	0.000784826		1195.19	-0.00175926		1195.19	-0.00107076		1195.19	-0.000323467		1195.19	0.000999743
	1195.67	-0.00441889		1195.67	-0.00416151		1195.67	-0.00306581		1195.67	-0.000668627		1195.67	-0.00262923		1195.67	-0.00183733		1195.67	-0.00180718		1195.67	0.000417391		1195.67	-0.00160724		1195.67	-0.0014219		1195.67	-0.000254991		1195.67	0.00149732
	1196.15	-0.00412531		1196.15	-0.00436559		1196.15	-0.00294015		1196.15	-0.000994538		1196.15	-0.00321121		1196.15	-0.00226018		1196.15	-0.0016926		1196.15	1.14977e-05		1196.15	-0.00167811		1196.15	-0.00177137		1196.15	-0.000446351		1196.15	0.00176209
	1196.63	-0.00381968		1196.63	-0.00483416		1196.63	-0.00298385		1196.63	-0.00151737		1196.63	-0.00382474		1196.63	-0.0027809		1196.63	-0.00188408		1196.63	-0.000459425		1196.63	-0.00200666		1196.63	-0.00204792		1196.63	-0.00095966		1196.63	0.00167088
	1197.12	-0.00357768		1197.12	-0.00560095		1197.12	-0.00320273		1197.12	-0.00222989		1197.12	-0.00448144		1197.12	-0.00339526		1197.12	-0.00240354		1197.12	-0.00103295		1197.12	-0.00258002		1197.12	-0.00219966		1197.12	-0.00179649		1197.12	0.00117603
	1197.6	-0.0034472		1197.6	-0.00662688		1197.6	-0.00358511		1197.6	-0.00309848		1197.6	-0.0051824		1197.6	-0.00408002		1197.6	-0.00320227		1197.6	-0.00172197		1197.6	-0.00333371		1197.6	-0.00221393		1197.6	-0.00288429		1197.6	0.000329875
	1198.08	-0.00343862		1198.08	-0.00780126		1198.08	-0.00410073		1198.08	-0.0040576		1198.08	-0.00590648		1198.08	-0.0047948		1198.08	-0.00416414		1198.08	-0.00249207		1198.08	-0.00415833		1198.08	-0.00212218		1198.08	-0.00408265		1198.08	-0.000727345
	1198.56	-0.00352727		1198.56	-0.00896946		1198.56	-0.00469894		1198.56	-0.00500923		1198.56	-0.00660584		1198.56	-0.00549342		1198.56	-0.00512994		1198.56	-0.00325614		1198.56	-0.00492124		1198.56	-0.00198215		1198.56	-0.0052116		1198.56	-0.00180929
	1199.04	-0.00367902		1199.04	-0.00996782		1199.04	-0.00531373		1199.04	-0.00584258		1199.04	-0.00720979		1199.04	-0.00613703		1199.04	-0.00593616		1199.04	-0.00389777		1199.04	-0.00549382		1199.04	-0.00185779		1199.04	-0.00609014		1199.04	-0.00273668
	1199.53	-0.00386303		1199.53	-0.0106598		1199.53	-0.00586454		1199.53	-0.00645481		1199.53	-0.00763689		1199.53	-0.00669596		1199.53	-0.0064556		1199.53	-0.00430208		1199.53	-0.0057816		1199.53	-0.001792		1199.53	-0.00657043		1199.53	-0.00338145
	1200.01	-0.00406469		1200.01	-0.0109664		1200.01	-0.00627212		1200.01	-0.00677987		1200.01	-0.00781139		1200.01	-0.00714419		1200.01	-0.00662724		1200.01	-0.00439056		1200.01	-0.00574711		1200.01	-0.001798		1200.01	-0.00657548		1200.01	-0.00369295
	1200.49	-0.00428017		1200.49	-0.0108822		1200.49	-0.0064712		1200.49	-0.00680835		1200.49	-0.00768425		1200.49	-0.00744981		1200.49	-0.00646986		1200.49	-0.00414714		1200.49	-0.00542128		1200.49	-0.00186046		1200.49	-0.00611769		1200.49	-0.00369626
	1200.97	-0.00450849		1200.97	-0.0104735		1200.97	-0.00643085		1200.97	-0.00658838		1200.97	-0.00724567		1200.97	-0.00756607		1200.97	-0.00606744		1200.97	-0.00362313		1200.97	-0.00489163		1200.97	-0.00195141		1200.97	-0.00529743		1200.97	-0.00346958
	1201.45	-0.00473735		1201.45	-0.00985676		1201.45	-0.00615682		1201.45	-0.00620167		1201.45	-0.00653054		1201.45	-0.00743948		1201.45	-0.00553494		1201.45	-0.00292198		1201.45	-0.00427118		1201.45	-0.00204492		1201.45	-0.00427672		1201.45	-0.00310332
	1201.94	-0.00494345		1201.94	-0.00916529		1201.94	-0.00569269		1201.94	-0.00573377		1201.94	-0.0056123		1201.94	-0.00702684		1201.94	-0.00497867		1201.94	-0.00217496		1201.94	-0.00366341		1201.94	-0.00213108		1201.94	-0.003239		1201.94	-0.0026732
	1202.42	-0.00509674		1202.42	-0.0085197		1202.42	-0.00510476		1202.42	-0.00524735		1202.42	-0.00459676		1202.42	-0.00632464		1202.42	-0.00447216		1202.42	-0.00151602		1202.42	-0.00314105		1202.42	-0.00221093		1202.42	-0.00235404		1202.42	-0.00222979
	1202.9	-0.00517307		1202.9	-0.00800511		1202.9	-0.0044718		1202.9	-0.00477242		1202.9	-0.00361094		1202.9	-0.00538927		1202.9	-0.00404719		1202.9	-0.0010589		1202.9	-0.00273507		1202.9	-0.00228737		1202.9	-0.00174979		1202.9	-0.00180262
	1203.38	-0.00516334		1203.38	-0.00766244		1203.38	-0.00387062		1203.38	-0.00431744		1203.38	-0.00279337		1203.38	-0.00434381		1203.38	-0.00371023		1203.38	-0.000886457		1203.38	-0.00244904		1203.38	-0.0023521		1203.38	-0.00149782		1203.38	-0.00142124
	1203.87	-0.00507798		1203.87	-0.00748238		1203.87	-0.00336925		1203.87	-0.00388464		1203.87	-0.00226799		1203.87	-0.00335502		1203.87	-0.00345496		1203.87	-0.00103163		1203.87	-0.00226938		1203.87	-0.00238453		1203.87	-0.00160129		1203.87	-0.00111988
	1204.35	-0.00494345		1204.35	-0.00741196		1204.35	-0.0030163		1204.35	-0.00348503		1204.35	-0.00211618		1204.35	-0.0025845		1204.35	-0.00327452		1204.35	-0.00146236		1204.35	-0.00218007		1204.35	-0.00235863		1204.35	-0.0019967		1204.35	-0.000932616
	1204.83	-0.00478507		1204.83	-0.00736059		1204.83	-0.00282979		1204.83	-0.00313585		1204.83	-0.00233753		1204.83	-0.00212768		1204.83	-0.00315842		1204.83	-0.00207677		1204.83	-0.00216039		1204.83	-0.00225708		1204.83	-0.00256158		1204.83	-0.000872205
	1205.31	-0.00461489		1205.31	-0.00722628		1205.31	-0.00279505		1205.31	-0.00285046		1205.31	-0.00284048		1205.31	-0.00197803		1205.31	-0.00308667		1205.31	-0.00271706		1205.31	-0.00218294		1205.31	-0.00208511		1205.31	-0.00314313		1205.31	-0.000913373
	1205.79	-0.0044249		1205.79	-0.00691585		1205.79	-0.00286876		1205.79	-0.00262215		1205.79	-0.00345344		1205.79	-0.00202932		1205.79	-0.00302077		1205.79	-0.00320319		1205.79	-0.00220608		1205.79	-0.00187392		1205.79	-0.00359148		1205.79	-0.000988125
	1206.28	-0.00419089		1206.28	-0.00637411		1206.28	-0.00298698		1206.28	-0.00241939		1206.28	-0.00397024		1206.28	-0.00212162		1206.28	-0.00290645		1206.28	-0.00337737		1206.28	-0.00217836		1206.28	-0.00167078		1206.28	-0.00379646		1206.28	-0.00100512
	1206.76	-0.00388575		1206.76	-0.00560131		1206.76	-0.00308328		1206.76	-0.00219491		1206.76	-0.00420454		1206.76	-0.00210628		1206.76	-0.00268564		1206.76	-0.00314451		1206.76	-0.00204709		1206.76	-0.00152536		1206.76	-0.00371286		1206.76	-0.000880307
	1207.24	-0.00349545		1207.24	-0.00466498		1207.24	-0.00310612		1207.24	-0.00191067		1207.24	-0.00405428		1207.24	-0.0019049		1207.24	-0.0023232		1207.24	-0.00250788		1207.24	-0.00178418		1207.24	-0.00147094		1207.24	-0.00337497		1207.24	-0.000575687
	1207.72	-0.0030312		1207.72	-0.00369314		1207.72	-0.00303824		1207.72	-0.00156587		1207.72	-0.00353746		1207.72	-0.00153919		1207.72	-0.00182572		1207.72	-0.00157871		1207.72	-0.00140552		1207.72	-0.00152038		1207.72	-0.0028918		1207.72	-0.000121585
	1208.2	-0.00253213		1208.2	-0.00284944		1208.2	-0.00290826		1208.2	-0.00121541		1208.2	-0.00280335		1208.2	-0.0011205		1208.2	-0.00125506		1208.2	-0.000555402		1208.2	-0.000987728		1208.2	-0.00166824		1208.2	-0.00241866		1208.2	0.000382204
	1208.69	-0.00205534		1208.69	-0.00228783		1208.69	-0.00278811		1208.69	-0.000960917		1208.69	-0.00208545		1208.69	-0.000799153		1208.69	-0.000711997		1208.69	0.000329278		1208.69	-0.000652184		1208.69	-0.00190305		1208.69	-0.0021112		1208.69	0.000798734
	1209.17	-0.001662		1209.17	-0.00211156		1209.17	-0.00277431		1209.17	-0.000918398		1209.17	-0.00162688		1209.17	-0.000703627		1209.17	-0.000308037		1209.17	0.000872832		1209.17	-0.000537565		1209.17	-0.00222		1209.17	-0.00207868		1209.17	0.000999079
	1209.65	-0.00140172		1209.65	-0.00234281		1209.65	-0.00295743		1209.65	-0.00117285		1209.65	-0.00159476		1209.65	-0.000889929		1209.65	-0.000124997		1209.65	0.000955808		1209.65	-0.000752947		1209.65	-0.00262521		1209.65	-0.00235128		1209.65	0.000905137
	1210.13	-0.00130643		1210.13	-0.00291685		1210.13	-0.00338803		1210.13	-0.00173735		1210.13	-0.00202691		1210.13	-0.00133011		1210.13	-0.000190744		1210.13	0.000562151		1210.13	-0.00134419		1210.13	-0.00312375		1210.13	-0.00287613		1210.13	0.000510398
	1210.62	-0.00138617		1210.62	-0.00369814		1210.62	-0.00405402		1210.62	-0.00253697		1210.62	-0.00282001		1210.62	-0.00193218		1210.62	-0.000468792		1210.62	-0.000226611		1210.62	-0.00226954		1210.62	-0.00370392		1210.62	-0.0035367		1210.62	-0.000122976
	1211.1	-0.00163137		1211.1	-0.00450797		1211.1	-0.00486781		1211.1	-0.00341913		1211.1	-0.00376486		1211.1	-0.00257762		1211.1	-0.000873462		1211.1	-0.00126147		1211.1	-0.003402		1211.1	-0.00431901		1211.1	-0.00418606		1211.1	-0.00088983
	1211.58	-0.00201395		1211.58	-0.00516439		1211.58	-0.00568197		1211.58	-0.00419115		1211.58	-0.00461013		1211.58	-0.00316497		1211.58	-0.00129497		1211.58	-0.00236047		1211.58	-0.00455476		1211.58	-0.00488776		1211.58	-0.00468802		1211.58	-0.00167494
	1212.06	-0.00248904		1212.06	-0.00552477		1212.06	-0.00632411		1212.06	-0.00468081		1212.06	-0.00514501		1212.06	-0.00363709		1212.06	-0.00163622		1212.06	-0.00335153		1212.06	-0.00553043		1212.06	-0.00531292		1212.06	-0.00495328		1212.06	-0.00238716
	1212.54	-0.00300438		1212.54	-0.00552307		1212.54	-0.00665162		1212.54	-0.00479064		1212.54	-0.00526251		1212.54	-0.0039879		1212.54	-0.00184304		1212.54	-0.00410871		1212.54	-0.00617822		1212.54	-0.00551786		1212.54	-0.00496226		1212.54	-0.00298487
	1213.03	-0.00350784		1213.03	-0.0051843		1213.03	-0.00659487		1213.03	-0.00452558		1213.03	-0.00498263		1213.03	-0.00424837		1213.03	-0.00191562		1213.03	-0.00457443		1213.03	-0.00643611		1213.03	-0.00547972		1213.03	-0.00476223		1213.03	-0.00348
	1213.51	-0.00395918		1213.51	-0.00460613		1213.51	-0.00617531		1213.51	-0.00398032		1213.51	-0.00442286		1213.51	-0.00445497		1213.51	-0.00189768		1213.51	-0.00476101		1213.51	-0.00633819		1213.51	-0.00523989		1213.51	-0.00444139		1213.51	-0.0039226
	1213.99	-0.00433076		1213.99	-0.00392434		1213.99	-0.00548868		1213.99	-0.00329596		1213.99	-0.00374216		1213.99	-0.00462767		1213.99	-0.00184997		1213.99	-0.0047347		1213.99	-0.00599365		1213.99	-0.00488864		1213.99	-0.00409459		1213.99	-0.00437412
	1214.47	-0.00461328		1214.47	-0.00327143		1214.47	-0.00467108		1214.47	-0.00261266		1214.47	-0.00308164		1214.47	-0.00476042		1214.47	-0.0018215		1214.47	-0.00459197		1214.47	-0.0055425		1214.47	-0.004532		1214.47	-0.0037959		1214.47	-0.0048797
	1214.95	-0.00480388		1214.95	-0.00274139		1214.95	-0.00385298		1214.95	-0.00203195		1214.95	-0.00253104		1214.95	-0.00482633		1214.95	-0.00183321		1214.95	-0.00443566		1214.95	-0.00511495		1214.95	-0.00424831		1214.95	-0.003579		1214.95	-0.0054486
	1215.44	-0.00490578		1215.44	-0.00237023		1215.44	-0.00312842		1215.44	-0.00160295		1215.44	-0.00212185		1215.44	-0.00479418		1215.44	-0.0018726		1215.44	-0.00435129		1215.44	-0.00479791		1215.44	-0.00406725		1215.44	-0.00343691		1215.44	-0.00604646
	1215.92	-0.00491967		1215.92	-0.00213326		1215.92	-0.00253197		1215.92	-0.00132582		1215.92	-0.00184393		1215.92	-0.00464469		1215.92	-0.00190279		1215.92	-0.00438564		1215.92	-0.00462066		1215.92	-0.00395901		1215.92	-0.00333052		1215.92	-0.00659872
	1216.4	-0.00484369		1216.4	-0.00196032		1216.4	-0.00204432		1216.4	-0.0011709		1216.4	-0.00166939		1216.4	-0.0043758		1216.4	-0.00187847		1216.4	-0.00453236		1216.4	-0.00455623		1216.4	-0.00385528		1216.4	-0.00320493		1216.4	-0.00700636
	1216.88	-0.0046737		1216.88	-0.0017685		1216.88	-0.00161163		1216.88	-0.00109849		1216.88	-0.00157686		1216.88	-0.00400248		1216.88	-0.00176451		1216.88	-0.00473234		1216.88	-0.00454023		1216.88	-0.00368355		1216.88	-0.00301116		1216.88	-0.00716736
	1217.37	-0.00440866		1217.37	-0.00149353		1217.37	-0.00118158		1217.37	-0.00107774		1217.37	-0.00155679		1217.37	-0.00354702		1217.37	-0.00154745		1217.37	-0.00489136		1217.37	-0.00449915		1217.37	-0.00340183		1217.37	-0.00272186		1217.37	-0.00700353
	1217.85	-0.00405304		1217.85	-0.00111499		1217.85	-0.000727246		1217.85	-0.00108881		1217.85	-0.0016077		1217.85	-0.00303054		1217.85	-0.00123927		1217.85	-0.00490886		1217.85	-0.0043773		1217.85	-0.00301577		1217.85	-0.00234142		1217.85	-0.00647992
	1218.33	-0.00362286		1218.33	-0.000661613		1218.33	-0.000261581		1218.33	-0.00111915		1218.33	-0.0017193		1218.33	-0.0024702		1218.33	-0.000873925		1218.33	-0.00470923		1218.33	-0.00414891		1218.33	-0.0025768		1218.33	-0.00190559		1218.33	-0.00561754
	1218.81	-0.00314526		1218.81	-0.000203992		1218.81	0.000171503		1218.81	-0.00115567		1218.81	-0.0018667		1218.81	-0.00188402		1218.81	-0.000504074		1218.81	-0.00427128		1218.81	-0.00382506		1218.81	-0.00216049		1218.81	-0.00147362		1218.81	-0.00450252
	1219.29	-0.0026565		1219.29	0.00016905		1219.29	0.00051491		1219.29	-0.00118191		1219.29	-0.00200913		1219.29	-0.0012983		1219.29	-0.000192764		1219.29	-0.003639		1219.29	-0.00344411		1219.29	-0.00184156		1219.29	-0.00111241		1219.29	-0.00327709
	1219.78	-0.00219491		1219.78	0.000380214		1219.78	0.000725081		1219.78	-0.00117946		1219.78	-0.00210523		1219.78	-0.000750864		1219.78	-4.60561e-06		1219.78	-0.00291201		1219.78	-0.00305953		1219.78	-0.00166748		1219.78	-0.000877529		1219.78	-0.00211479
	1220.26	-0.00179041		1220.26	0.000389665		1220.26	0.000790004		1220.26	-0.00113564		1220.26	-0.00212936		1220.26	-0.00028817		1220.26	7.15701e-06		1220.26	-0.00221597		1220.26	-0.00272262		1220.26	-0.00164731		1220.26	-0.000793398		1220.26	-0.00117887
	1220.74	-0.00146097		1220.74	0.000204253		1220.74	0.000730856		1220.74	-0.00104997		1220.74	-0.00208558		1220.74	3.97627e-05		1220.74	-0.000190313		1220.74	-0.00166355		1220.74	-0.00247112		1220.74	-0.00175415		1220.74	-0.000846214		1220.74	-0.000580187
	1221.22	-0.0012124		1221.22	-0.000126057		1221.22	0.00058813		1221.22	-0.000936782		1221.22	-0.00200475		1221.22	0.000188607		1221.22	-0.000600702		1221.22	-0.00132361		1221.22	-0.00232501		1221.22	-0.00193964		1221.22	-0.000988489		1221.22	-0.000352734
	1221.7	-0.00104323		1221.7	-0.00052777		1221.7	0.000401074		1221.7	-0.000821245		1221.7	-0.00193228		1221.7	0.000122646		1221.7	-0.001198		1221.7	-0.00121277		1221.7	-0.00229291		1221.7	-0.00214799		1221.7	-0.00115758		1221.7	-0.000455884
	1222.19	-0.000954602		1222.19	-0.000923656		1222.19	0.000189999		1222.19	-0.000732373		1222.19	-0.00190876		1222.19	-0.000181371		1222.19	-0.00192651		1222.19	-0.00130445		1222.19	-0.00237543		1222.19	-0.00232728		1222.19	-0.00129619		1222.19	-0.000795978
	1222.67	-0.000953048		1222.67	-0.00125304		1222.67	-4.89694e-05		1222.67	-0.000697078		1222.67	-0.00195837		1222.67	-0.000730256		1222.67	-0.00271208		1222.67	-0.00155524		1222.67	-0.00257288		1222.67	-0.00243497		1222.67	-0.00137236		1222.67	-0.00126325
	1223.15	-0.00105394		1223.15	-0.00148481		1223.15	-0.000341312		1223.15	-0.000736045		1223.15	-0.00208307		1223.15	-0.00150892		1223.15	-0.00347314		1223.15	-0.00192644		1223.15	-0.00288212		1223.15	-0.00244674		1223.15	-0.00139254		1223.15	-0.00176309
	1223.63	-0.00127389		1223.63	-0.00162556		1223.63	-0.000717488		1223.63	-0.000863939		1223.63	-0.00227129		1223.63	-0.00247349		1223.63	-0.0041393		1223.63	-0.0023988		1223.63	-0.00329221		1223.63	-0.00236522		1223.63	-0.00139839		1223.63	-0.00223925
	1224.12	-0.00162411		1224.12	-0.00171854		1224.12	-0.00120057		1224.12	-0.00109023		1224.12	-0.00251002		1224.12	-0.00355139		1224.12	-0.0046697		1224.12	-0.00297213		1224.12	-0.00377862		1224.12	-0.00223246		1224.12	-0.00145499		1224.12	-0.00268172
	1224.6	-0.00210032		1224.6	-0.00183232		1224.6	-0.00179015		1224.6	-0.00141824		1224.6	-0.00279706		1224.6	-0.00465042		1224.6	-0.0050618		1224.6	-0.00365099		1224.6	-0.00430251		1224.6	-0.00213082		1224.6	-0.00162638		1224.6	-0.00311273
	1225.08	-0.00267807		1225.08	-0.00203875		1225.08	-0.00245959		1225.08	-0.00184403		1225.08	-0.00313931		1225.08	-0.00567291		1225.08	-0.00534817		1225.08	-0.00442696		1225.08	-0.00481486		1225.08	-0.00217064		1225.08	-0.00194976		1225.08	-0.00356556
	1225.56	-0.00331007		1225.56	-0.00238911		1225.56	-0.00315628		1225.56	-0.0023491		1225.56	-0.00354429		1225.56	-0.00653381		1225.56	-0.00558149		1225.56	-0.00526251		1225.56	-0.00526915		1225.56	-0.00245883		1225.56	-0.00242133		1225.56	-0.00405842
	1226.04	-0.00393035		1226.04	-0.00289131		1226.04	-0.00380894		1226.04	-0.00289578		1226.04	-0.0040012		1226.04	-0.00717375		1226.04	-0.00581306		1226.04	-0.00608714		1226.04	-0.00562948		1226.04	-0.00306147		1226.04	-0.00299264		1226.04	-0.0045762
	1226.53	-0.00446051		1226.53	-0.00349736		1226.53	-0.00433495		1226.53	-0.00342803		1226.53	-0.00447193		1226.53	-0.00756815		1226.53	-0.00607822		1226.53	-0.00680766		1226.53	-0.00588181		1226.53	-0.00396394		1226.53	-0.00358406		1226.53	-0.00507224
	1227.01	-0.00482574		1227.01	-0.00410808		1227.01	-0.0046557		1227.01	-0.0038783		1227.01	-0.00488966		1227.01	-0.00772602		1227.01	-0.00638452		1227.01	-0.00732938		1227.01	-0.0060346		1227.01	-0.00505613		1227.01	-0.00410644		1227.01	-0.00547824
	1227.49	-0.00496956		1227.49	-0.0045963		1227.49	-0.00471349		1227.49	-0.00418632		1227.49	-0.00517804		1227.49	-0.00768594		1227.49	-0.0067141		1227.49	-0.00758411		1227.49	-0.00611618		1227.49	-0.00614846		1227.49	-0.00448996		1227.49	-0.00572847
	1227.97	-0.00487226		1227.97	-0.00484425		1227.97	-0.00448918		1227.97	-0.00431799		1227.97	-0.0052758		1227.97	-0.00749964		1227.97	-0.00703143		1227.97	-0.00755148		1227.97	-0.00616208		1227.97	-0.00702371		1227.97	-0.00470634		1227.97	-0.00578291
	1228.45	-0.00455469		1228.45	-0.00478415		1228.45	-0.00401371		1228.45	-0.0042781		1228.45	-0.00516102		1228.45	-0.00721846		1228.45	-0.00729517		1228.45	-0.00726571		1228.45	-0.00620203		1228.45	-0.00750498		1228.45	-0.00477812		1228.45	-0.00564118
	1228.94	-0.00407283		1228.94	-0.00441614		1228.94	-0.00336695		1228.94	-0.00410999		1228.94	-0.0048568		1228.94	-0.00687945		1228.94	-0.00746798		1228.94	-0.00680443		1228.94	-0.00624766		1228.94	-0.00750791		1228.94	-0.00476547		1228.94	-0.00534326
	1229.42	-0.00349838		1229.42	-0.00380766		1229.42	-0.00266236		1229.42	-0.00387935		1229.42	-0.0044208		1229.42	-0.00650332		1229.42	-0.00752074		1229.42	-0.00626625		1229.42	-0.00629182		1229.42	-0.00706104		1229.42	-0.00474345		1229.42	-0.00495662
	1229.9	-0.00290131		1229.9	-0.00306831		1229.9	-0.00202599		1229.9	-0.00365599		1229.9	-0.00392286		1229.9	-0.00610138		1229.9	-0.00743209		1229.9	-0.00574629		1229.9	-0.00631216		1229.9	-0.00628973		1229.9	-0.00477288		1229.9	-0.00455987
	1230.38	-0.00233216		1230.38	-0.0023143		1230.38	-0.00156673		1230.38	-0.00349397		1230.38	-0.00342537		1230.38	-0.00568514		1230.38	-0.00719151		1230.38	-0.0053177		1230.38	-0.00628437		1230.38	-0.0053701		1230.38	-0.00487619		1230.38	-0.00422731
	1230.86	-0.00181803		1230.86	-0.00163549		1230.86	-0.00135281		1230.86	-0.00342202		1230.86	-0.00296776		1230.86	-0.00527446		1230.86	-0.00680313		1230.86	-0.00502056		1230.86	-0.00619374		1230.86	-0.00447983		1230.86	-0.00503134		1230.86	-0.00401617
	1231.35	-0.00136509		1231.35	-0.00107453		1231.35	-0.00139291		1231.35	-0.00344358		1231.35	-0.00257186		1231.35	-0.0048989		1231.35	-0.00629038		1231.35	-0.00486017		1231.35	-0.00604407		1231.35	-0.00374945		1231.35	-0.00518043		1231.35	-0.00395911
	1231.83	-0.000972058		1231.83	-0.000626775		1231.83	-0.00163731		1231.83	-0.00354416		1231.83	-0.0022491		1231.83	-0.0045863		1231.83	-0.00569842		1231.83	-0.00481184		1231.83	-0.00585693		1231.83	-0.00323897		1231.83	-0.00525468		1231.83	-0.00406203
	1232.31	-0.000643252		1232.31	-0.000264992		1232.31	-0.0019964		1232.31	-0.00370339		1232.31	-0.00201969		1232.31	-0.00435326		1232.31	-0.00508917		1232.31	-0.00483484		1232.31	-0.00566624		1232.31	-0.00294373		1232.31	-0.00520463		1232.31	-0.00430513
	1232.79	-0.000397592		1232.79	3.04513e-05		1232.79	-0.00237342		1232.79	-0.00390602		1232.79	-0.00191625		1232.79	-0.00419591		1232.79	-0.00452974		1232.79	-0.00488717		1232.79	-0.00550595		1232.79	-0.00282336		1232.79	-0.00502204		1232.79	-0.00465233
	1233.28	-0.000262773		1233.28	0.000247913		1233.28	-0.00268814		1233.28	-0.00414081		1233.28	-0.0019813		1233.28	-0.00408855		1233.28	-0.0040768		1233.28	-0.00493605		1233.28	-0.00540253		1233.28	-0.00283275		1233.28	-0.00474427		1233.28	-0.0050559
	1233.76	-0.000262574		1233.76	0.000342575		1233.76	-0.00289506		1233.76	-0.00439698		1233.76	-0.00224535		1233.76	-0.00399322		1233.76	-0.00376233		1233.76	-0.00496245		1233.76	-0.00536865		1233.76	-0.00294308		1233.76	-0.00444156		1233.76	-0.00546251
	1234.24	-0.000396235		1234.24	0.000256997		1234.24	-0.00297944		1234.24	-0.00465662		1234.24	-0.00270672		1234.24	-0.00387068		1234.24	-0.00358701		1234.24	-0.00496098		1234.24	-0.00540665		1234.24	-0.00313704		1234.24	-0.00419013		1234.24	-0.00581649
	1234.72	-0.000626444		1234.72	-4.01235e-05		1234.72	-0.00294818		1234.72	-0.00489182		1234.72	-0.00330915		1234.72	-0.00369298		1234.72	-0.0035178		1234.72	-0.00493107		1234.72	-0.00550749		1234.72	-0.00339171		1234.72	-0.00403945		1234.72	-0.00606495
	1235.2	-0.000882126		1235.2	-0.00052264		1235.2	-0.00281708		1235.2	-0.00507162		1235.2	-0.00394995		1235.2	-0.00345269		1235.2	-0.0034989		1235.2	-0.00487118		1235.2	-0.00565724		1235.2	-0.00366249		1235.2	-0.00399283		1235.2	-0.00616355
	1235.68	-0.00107856		1235.68	-0.00109552		1235.68	-0.00259985		1235.68	-0.00517169		1235.68	-0.00449911		1235.68	-0.00316079		1235.68	-0.00346761		1235.68	-0.00477278		1235.68	-0.00583519		1235.68	-0.0038781		1235.68	-0.00399956		1235.68	-0.00608456
	1236.17	-0.00115008		1236.17	-0.00162054		1236.17	-0.00230992		1236.17	-0.00518744		1236.17	-0.00484251		1236.17	-0.00284499		1236.17	-0.00337662		1236.17	-0.00462262		1236.17	-0.00601633		1236.17	-0.0039597		1236.17	-0.00397612		1236.17	-0.00582205
	1236.65	-0.00107711		1236.65	-0.00195913		1236.65	-0.00196711		1236.65	-0.00513784		1236.65	-0.00491433		1236.65	-0.00253875		1236.65	-0.00320618		1236.65	-0.0044085		1236.65	-0.00616898		1236.65	-0.00384687		1236.65	-0.00383666		1236.65	-0.00539412
	1237.13	-0.000892773		1237.13	-0.00202302		1237.13	-0.00160569		1237.13	-0.00505882		1237.13	-0.00471585		1237.13	-0.00227551		1237.13	-0.00296802		1237.13	-0.00413017		1237.13	-0.00625824		1237.13	-0.00352536		1237.13	-0.0035297		1237.13	-0.00483743
	1237.61	-0.000670049		1237.61	-0.00180397		1237.61	-0.00127799		1237.61	-0.00498964		1237.61	-0.00430891		1237.61	-0.00208373		1237.61	-0.00269648		1237.61	-0.00380582		1237.61	-0.00624845		1237.61	-0.00303972		1237.61	-0.00305867		1237.61	-0.00420263
	1238.1	-0.000489545		1238.1	-0.00137831		1238.1	-0.00104558		1238.1	-0.00495672		1238.1	-0.00379396		1238.1	-0.00198294		1238.1	-0.0024358		1238.1	-0.00347406		1238.1	-0.00611118		1238.1	-0.00247968		1238.1	-0.00248327		1238.1	-0.00354554
	1238.58	-0.000406993		1238.58	-0.000880935		1238.58	-0.000963793		1238.58	-0.00496308		1238.58	-0.00327863		1238.58	-0.00198037		1238.58	-0.00222349		1238.58	-0.0031873		1238.58	-0.00583267		1238.58	-0.00195656		1238.58	-0.00190269		1238.58	-0.00291997
	1239.06	-0.000426921		1239.06	-0.000463		1239.06	-0.00106035		1239.06	-0.00498709		1239.06	-0.00284934		1239.06	-0.002068		1239.06	-0.00207832		1239.06	-0.00299626		1239.06	-0.00542183		1239.06	-0.00156534		1239.06	-0.0014227		1239.06	-0.00236953
	1239.54	-0.000505		1239.54	-0.00024244		1239.54	-0.00132397		1239.54	-0.00499357		1239.54	-0.00255219		1239.54	-0.00222085		1239.54	-0.00199805		1239.54	-0.00293162		1239.54	-0.00490965		1239.54	-0.00135704		1239.54	-0.00112087		1239.54	-0.00192212
	1240.03	-0.000569433		1240.03	-0.000272707		1240.03	-0.00170435		1240.03	-0.00494824		1240.03	-0.00239342		1240.03	-0.0024011		1240.03	-0.00196246		1240.03	-0.00299188		1240.03	-0.00434244		1240.03	-0.0013286		1240.03	-0.00102531		1240.03	-0.0015876
	1240.51	-0.000558612		1240.51	-0.000537267		1240.51	-0.00213072		1240.51	-0.00483386		1240.51	-0.00234993		1240.51	-0.00256948		1240.51	-0.00194584		1240.51	-0.00314526		1240.51	-0.00377169		1240.51	-0.00143924		1240.51	-0.0011138		1240.51	-0.00136374
	1240.99	-0.000449032		1240.99	-0.000971		1240.99	-0.00253279		1240.99	-0.00465344		1240.99	-0.00238766		1240.99	-0.00269562		1240.99	-0.0019269		1240.99	-0.00334117		1240.99	-0.00324545		1240.99	-0.00163394		1240.99	-0.0013318		1240.99	-0.00124131
	1241.47	-0.000266183		1241.47	-0.00148666		1241.47	-0.00285559		1241.47	-0.00442486		1241.47	-0.00246967		1241.47	-0.00276634		1241.47	-0.00189233		1241.47	-0.003525		1241.47	-0.00279762		1241.47	-0.00186934		1241.47	-0.00161651		1241.47	-0.00120626
	1241.95	-7.22262e-05		1241.95	-0.00200072		1241.95	-0.00306585		1241.95	-0.00417028		1241.95	-0.0025626		1241.95	-0.00278926		1241.95	-0.00183971		1241.95	-0.00365654		1241.95	-0.00244878		1241.95	-0.00212102		1241.95	-0.0019146		1241.95	-0.00124194
	1242.43	6.12692e-05		1242.43	-0.00244328		1242.43	-0.00314717		1242.43	-0.00390201		1242.43	-0.00263078		1242.43	-0.0027858		1242.43	-0.00177144		1242.43	-0.00371512		1242.43	-0.00220196		1242.43	-0.00237728		1242.43	-0.00218996		1242.43	-0.00132314
	1242.92	8.59913e-05		1242.92	-0.00276157		1242.92	-0.00309161		1242.92	-0.00361849		1242.92	-0.00263802		1242.92	-0.00277978		1242.92	-0.00169161		1242.92	-0.00370063		1242.92	-0.00204765		1242.92	-0.0026259		1242.92	-0.00242048		1242.92	-0.00141381
	1243.4	-4.14174e-06		1243.4	-0.00291566		1243.4	-0.00289272		1243.4	-0.00330675		1243.4	-0.00255025		1243.4	-0.00278198		1243.4	-0.00160397		1243.4	-0.00362349		1243.4	-0.00196484		1243.4	-0.00284038		1243.4	-0.00258934		1243.4	-0.0014684
	1243.88	-0.000170872		1243.88	-0.00288025		1243.88	-0.00254567		1243.88	-0.00295239		1243.88	-0.00234966		1243.88	-0.00278327		1243.88	-0.00151222		1243.88	-0.00349322		1243.88	-0.00192925		1243.88	-0.00297826		1243.88	-0.00267843		1243.88	-0.00144086
	1244.36	-0.000352337		1244.36	-0.00264497		1244.36	-0.00205553		1244.36	-0.00255502		1244.36	-0.00204432		1244.36	-0.00275581		1244.36	-0.00142316		1244.36	-0.00331033		1244.36	-0.00192054		1244.36	-0.00299425		1244.36	-0.0026702		1244.36	-0.00129933
	1244.85	-0.000486963		1244.85	-0.00222359		1244.85	-0.001447		1244.85	-0.00213382		1244.85	-0.00167649		1244.85	-0.00266819		1244.85	-0.00135043		1244.85	-0.00306749		1244.85	-0.00193063		1244.85	-0.0028576		1244.85	-0.00255637		1244.85	-0.0010391
	1245.33	-0.000533495		1245.33	-0.00165768		1245.33	-0.000772429		1245.33	-0.00172596		1245.33	-0.00131304		1245.33	-0.00250179		1245.33	-0.00131029		1245.33	-0.00275719		1245.33	-0.00196391		1245.33	-0.0025683		1245.33	-0.00234983		1245.33	-0.000688708
	1245.81	-0.000473261		1245.81	-0.00101583		1245.81	-0.000106281		1245.81	-0.00137382		1245.81	-0.00102898		1245.81	-0.00226476		1245.81	-0.00131921		1245.81	-0.00238436		1245.81	-0.00203436		1245.81	-0.00215884		1245.81	-0.00208851		1245.81	-0.000306084
	1246.29	-0.000304461		1246.29	-0.00038253		1246.29	0.00046847		1246.29	-0.00110801		1246.29	-0.000882225		1246.29	-0.00199416		1246.29	-0.00138429		1246.29	-0.00197295		1246.29	-0.00215386		1246.29	-0.00168646		1246.29	-0.00183232		1246.29	3.56205e-05
	1246.77	-3.17744e-05		1246.77	0.000161857		1246.77	0.000884784		1246.77	-0.000933905		1246.77	-0.000893434		1246.77	-0.00174722		1246.77	-0.00149901		1246.77	-0.0015668		1246.77	-0.00232244		1246.77	-0.00121283		1246.77	-0.00164619		1246.77	0.000268966
	1247.26	0.000339193		1247.26	0.000563843		1247.26	0.00111071		1247.26	-0.000828323		1247.26	-0.00103662		1247.26	-0.00157769		1247.26	-0.00163972		1247.26	-0.00121852		1247.26	-0.00251651		1247.26	-0.000782352		1247.26	-0.00157541		1247.26	0.000353353
	1247.74	0.000796444		1247.74	0.000807398		1247.74	0.00115726		1247.74	-0.000750831		1247.74	-0.00125331		1247.74	-0.00151932		1247.74	-0.0017754		1247.74	-0.000976191		1247.74	-0.00269141		1247.74	-0.000410833		1247.74	-0.00162962		1247.74	0.000285113
	1248.22	0.00131097		1248.22	0.000915763		1248.22	0.0010665		1248.22	-0.000662573		1248.22	-0.00147454		1248.22	-0.00157248		1248.22	-0.00187518		1248.22	-0.000870155		1248.22	-0.0027891		1248.22	-8.86908e-05		1248.22	-0.00177537		1248.22	9.47406e-05
	1248.7	0.0018296		1248.7	0.000933328		1248.7	0.000891226		1248.7	-0.00054564		1248.7	-0.00165051		1248.7	-0.00170903		1248.7	-0.00192159		1248.7	-0.00090838		1248.7	-0.00275894		1248.7	0.000205248		1248.7	-0.00194943		1248.7	-0.000169216
	1249.18	0.0022761		1249.18	0.00090786		1249.18	0.000670587		1249.18	-0.000411926		1249.18	-0.00176467		1249.18	-0.00188563		1249.18	-0.00191523		1249.18	-0.00107727		1249.18	-0.0025732		1249.18	0.000482998		1249.18	-0.00208215		1249.18	-0.000456811
	1249.67	0.00257168		1249.67	0.000873562		1249.67	0.000421703		1249.67	-0.000298005		1249.67	-0.00183717		1249.67	-0.00206075		1249.67	-0.00187696		1249.67	-0.00135116		1249.67	-0.00224488		1249.67	0.000737129		1249.67	-0.00212135		1249.67	-0.000732671
	1250.15	0.00266271		1250.15	0.000845575		1250.15	0.000139318		1250.15	-0.000248368		1250.15	-0.00190662		1250.15	-0.00220681		1250.15	-0.0018402		1250.15	-0.00169827		1250.15	-0.00182707		1250.15	0.000938641		1250.15	-0.0020524		1250.15	-0.000981017
	1250.63	0.00254925		1250.63	0.000823797		1250.63	-0.000186803		1250.63	-0.000292972		1250.63	-0.00201052		1250.63	-0.0023142		1250.63	-0.001841		1250.63	-0.0020865		1250.63	-0.00140397		1250.63	0.00104913		1250.63	-0.0019018		1250.63	-0.00120137
	1251.11	0.00229372		1251.11	0.000803614		1251.11	-0.000555634		1251.11	-0.000430231		1251.11	-0.00216286		1251.11	-0.00238278		1251.11	-0.00190579		1251.11	-0.00248548		1251.11	-0.00106389		1251.11	0.00103731		1251.11	-0.001726		1251.11	-0.00140169
	1251.6	0.00200306		1251.6	0.000781872		1251.6	-0.000944419		1251.6	-0.000625484		1251.6	-0.00234927		1251.6	-0.00241448		1251.6	-0.00204432		1251.6	-0.00286883		1251.6	-0.000873495		1251.6	0.000890761		1251.6	-0.00158981		1251.6	-0.00158763
	1252.08	0.00178728		1252.08	0.000762454		1252.08	-0.00131152		1252.08	-0.000824453		1252.08	-0.00253351		1252.08	-0.0024043		1252.08	-0.00224736		1252.08	-0.00321286		1252.08	-0.000859144		1252.08	0.000617461		1252.08	-0.00154312		1252.08	-0.00176134
	1252.56	0.00171811		1252.56	0.000749907		1252.56	-0.00160862		1252.56	-0.000974306		1252.56	-0.00267636		1252.56	-0.00234188		1252.56	-0.00249049		1252.56	-0.00349979		1252.56	-0.00100604		1252.56	0.000239161		1252.56	-0.0016078		1252.56	-0.00192172
	1253.04	0.00180022		1253.04	0.000746024		1253.04	-0.00179619		1253.04	-0.00104303		1253.04	-0.00275044		1253.04	-0.00221799		1253.04	-0.00273777		1253.04	-0.00371585		1253.04	-0.00126808		1253.04	-0.000219822		1253.04	-0.00177395		1253.04	-0.0020685
	1253.52	0.00197147		1253.52	0.000744729		1253.52	-0.00185337		1253.52	-0.00102898		1253.52	-0.00275071		1253.52	-0.00203446		1253.52	-0.00294903		1253.52	-0.00385446		1253.52	-0.00158974		1253.52	-0.000736508		1253.52	-0.00200725		1253.52	-0.00220648
	1254.01	0.0021295		1254.01	0.000735436		1254.01	-0.0017817		1254.01	-0.000957545		1254.01	-0.00268923		1254.01	-0.0018082		1254.01	-0.00308437		1254.01	-0.00391583		1254.01	-0.00192074		1254.01	-0.00128938		1254.01	-0.00226242		1254.01	-0.00234468
	1254.49	0.00217622		1254.49	0.000709648		1254.49	-0.00159598		1254.49	-0.000865327		1254.49	-0.00258464		1254.49	-0.00156643		1254.49	-0.00310872		1254.49	-0.00390319		1254.49	-0.00222586		1254.49	-0.00184971		1254.49	-0.00249342		1254.49	-0.00248759
	1254.97	0.00206045		1254.97	0.000668928		1254.97	-0.0013172		1254.97	-0.000784502		1254.97	-0.00244848		1254.97	-0.00133372		1254.97	-0.0030006		1254.97	-0.00382043		1254.97	-0.00248456		1254.97	-0.00237622		1254.97	-0.00266407		1254.97	-0.0026319
	1255.45	0.00180042		1255.45	0.000626354		1255.45	-0.000962305		1255.45	-0.000727974		1255.45	-0.00227943		1255.45	-0.00111756		1255.45	-0.00275502		1255.45	-0.00366748		1255.45	-0.00268301		1255.45	-0.00281342		1255.45	-0.00275318		1255.45	-0.00275986
	1255.93	0.00147328		1255.93	0.000603625		1255.93	-0.000546467		1255.93	-0.000688642		1255.93	-0.00206615		1255.93	-0.000902858		1255.93	-0.00239		1255.93	-0.0034421		1255.93	-0.00280421		1255.93	-0.00310164		1255.93	-0.00275436		1255.93	-0.00284634
	1256.42	0.00118211		1256.42	0.000619717		1256.42	-8.99827e-05		1256.42	-0.000646759		1256.42	-0.00180005		1256.42	-0.000658404		1256.42	-0.00194465		1256.42	-0.00314342		1256.42	-0.0028283		1256.42	-0.00318891		1256.42	-0.00267375		1256.42	-0.00286767
	1256.9	0.00101465		1256.9	0.000682335		1256.9	0.000372752		1256.9	-0.000582238		1256.9	-0.00148544		1256.9	-0.000353992		1256.9	-0.00147557		1256.9	-0.00278007		1256.9	-0.00273451		1256.9	-0.00304772		1256.9	-0.00252692		1256.9	-0.00281359
	1257.38	0.00101376		1257.38	0.000783797		1257.38	0.000790203		1257.38	-0.000483422		1257.38	-0.00114724		1257.38	2.01791e-05		1257.38	-0.00104954		1257.38	-0.00237675		1257.38	-0.00251632		1257.38	-0.00268347		1257.38	-0.00233493		1257.38	-0.00269506
	1257.86	0.00116493		1257.86	0.000906034		1257.86	0.00110287		1257.86	-0.000347305		1257.86	-0.000822436		1257.86	0.000441039		1257.86	-0.000730719		1257.86	-0.00197305		1257.86	-0.00219013		1257.86	-0.00213655		1257.86	-0.0021197		1257.86	-0.00254211
	1258.35	0.00140846		1258.35	0.00103116		1258.35	0.00126275		1258.35	-0.000172462		1258.35	-0.000547261		1258.35	0.000855834		1258.35	-0.000565329		1258.35	-0.00161595		1258.35	-0.00180176		1258.35	-0.00147474		1258.35	-0.00189814		1258.35	-0.00239214
	1258.83	0.00166409		1258.83	0.00115456		1258.83	0.00125531		1258.83	4.96376e-05		1258.83	-0.000338001		1258.83	0.00120045		1258.83	-0.000570922		1258.83	-0.00134389		1258.83	-0.00141526		1258.83	-0.000775538		1258.83	-0.00167728		1258.83	-0.00227264
	1259.31	0.00186151		1259.31	0.00128757		1259.31	0.00111241		1259.31	0.000338497		1259.31	-0.000185147		1259.31	0.00142601		1259.31	-0.000732109		1259.31	-0.00117117		1259.31	-0.00109483		1259.31	-0.000108235		1259.31	-0.0014539		1259.31	-0.00218657
	1259.79	0.00196138		1259.79	0.0014552		1259.79	0.000905171		1259.79	0.000717978		1259.79	-5.73181e-05		1259.79	0.00152103		1259.79	-0.00100558		1259.79	-0.00108101		1259.79	-0.000878819		1259.79	0.000478951		1259.79	-0.00121769		1259.79	-0.0021079
	1260.27	0.00196305		1260.27	0.00167727		1260.27	0.000722027		1260.27	0.00119998		1260.27	7.74743e-05		1260.27	0.00151531		1260.27	-0.00133527		1260.27	-0.00103183		1260.27	-0.000767766		1260.27	0.000961221		1260.27	-0.000962008		1260.27	-0.00199459
	1260.76	0.00189056		1260.76	0.0019524		1260.76	0.00063508		1260.76	0.00176509		1260.76	0.000230077		1260.76	0.0014651		1260.76	-0.00166715		1260.76	-0.000975364		1260.76	-0.000723575		1260.76	0.00132719		1260.76	-0.000695721		1260.76	-0.00180958
	1261.24	0.00177726		1261.24	0.00224732		1261.24	0.000677125		1261.24	0.00235065		1261.24	0.000374609		1261.24	0.00142451		1261.24	-0.00196243		1261.24	-0.000878753		1261.24	-0.00068884		1261.24	0.00156991		1261.24	-0.000447013		1261.24	-0.00154306
	1261.72	0.00164796		1261.72	0.00250102		1261.72	0.00083286		1261.72	0.00285942		1261.72	0.000455434		1261.72	0.00142026		1261.72	-0.00220041		1261.72	-0.000740742		1261.72	-0.000612018		1261.72	0.0016772		1261.72	-0.000260918		1261.72	-0.00122347
	1262.2	0.00151355		1262.2	0.00264528		1262.2	0.00105312		1262.2	0.00318413		1262.2	0.0004091		1262.2	0.00143841		1262.2	-0.00237543		1262.2	-0.000592761		1262.2	-0.000471341		1262.2	0.00163529		1262.2	-0.000183027		1262.2	-0.000908578
	1262.68	0.00137026		1262.68	0.00263041		1262.68	0.00127784		1262.68	0.00324311		1262.68	0.000194971		1262.68	0.00143485		1262.68	-0.00248888		1262.68	-0.000486169		1262.68	-0.000284462		1262.68	0.00143512		1262.68	-0.000241149		1262.68	-0.000664657
	1263.17	0.00121115		1263.17	0.00244514		1263.17	0.00146341		1263.17	0.00301057		1263.17	-0.000181835		1263.17	0.00135837		1263.17	-0.00254158		1263.17	-0.000471904		1263.17	-0.000100782		1263.17	0.00108264		1263.17	-0.000431456		1263.17	-0.000537168
	1263.65	0.00103209		1263.65	0.00212348		1263.65	0.00159166		1263.65	0.00252652		1263.65	-0.000664359		1263.65	0.00117653		1263.65	-0.00253114		1263.65	-0.000578797		1263.65	1.70644e-05		1263.65	0.000602662		1263.65	-0.000714908		1263.65	-0.00053462
	1264.13	0.000839699		1264.13	0.00173511		1264.13	0.00166835		1264.13	0.00188707		1264.13	-0.00116062		1264.13	0.000892155		1264.13	-0.00245372		1264.13	-0.000805073		1264.13	1.48443e-05		1264.13	3.9597e-05		1264.13	-0.00102898		1264.13	-0.000626179
	1264.61	0.000650245		1264.61	0.00136465		1264.61	0.00170727		1264.61	0.00121909		1264.61	-0.00156947		1264.61	0.000543274		1264.61	-0.00231011		1264.61	-0.00111647		1264.61	-0.000133278		1264.61	-0.000551497		1264.61	-0.00130653		1264.61	-0.000754998
	1265.1	0.000486548		1265.1	0.0010869		1265.1	0.00171565		1265.1	0.000643675		1265.1	-0.00181407		1265.1	0.000185789		1265.1	-0.00211469		1265.1	-0.00145939		1265.1	-0.000416924		1265.1	-0.00111234		1265.1	-0.00149878		1265.1	-0.000863409
	1265.58	0.000370132		1265.58	0.000945647		1265.58	0.00168661		1265.58	0.000245162		1265.58	-0.00186515		1265.58	-0.000129667		1265.58	-0.00189626		1265.58	-0.00177619		1265.58	-0.000789893		1265.58	-0.00159321		1265.58	-0.00159083		1265.58	-0.000915853
	1266.06	0.000315484		1266.06	0.000943788		1266.06	0.00160546		1266.06	5.03667e-05		1266.06	-0.00174887		1266.06	-0.00038104		1266.06	-0.00169464		1266.06	-0.00202153		1266.06	-0.00118293		1266.06	-0.00195959		1266.06	-0.00160651		1266.06	-0.00091162
	1266.54	0.000324404		1266.54	0.0010487		1266.54	0.00146634		1266.54	2.91589e-05		1266.54	-0.00153147		1266.54	-0.000581874		1266.54	-0.00154755		1266.54	-0.00217064		1266.54	-0.00152133		1266.54	-0.0021932		1266.54	-0.00159489		1266.54	-0.000880538
	1267.02	0.000386349		1267.02	0.00120739		1267.02	0.0012882		1267.02	0.000116283		1267.02	-0.00129166		1267.02	-0.000772595		1267.02	-0.00147784		1267.02	-0.0022201		1267.02	-0.00174256		1267.02	-0.00228757		1267.02	-0.00160697		1267.02	-0.000862087
	1267.51	0.000483264		1267.51	0.00137219		1267.51	0.00111995		1267.51	0.000241183		1267.51	-0.00108719		1267.51	-0.000994803		1267.51	-0.00148197		1267.51	-0.00217816		1267.51	-0.00180764		1267.51	-0.00224116		1267.51	-0.00167062		1267.51	-0.000881101
	1267.99	0.000599046		1267.99	0.00151444		1267.99	0.00103315		1267.99	0.000355243		1267.99	-0.000938137		1267.99	-0.00126712		1267.99	-0.00152922		1267.99	-0.0020554		1267.99	-0.00170626		1267.99	-0.00205065		1267.99	-0.00177771		1267.99	-0.00093007
	1268.47	0.00072372		1268.47	0.00163123		1268.47	0.00109756		1268.47	0.000441338		1268.47	-0.000827727		1268.47	-0.00157277		1268.47	-0.00156881		1268.47	-0.00185954		1268.47	-0.00145354		1268.47	-0.00171692		1268.47	-0.00188745		1268.47	-0.00096981
	1268.95	0.000858722		1268.95	0.00173867		1268.95	0.00135571		1268.95	0.000507645		1268.95	-0.000720167		1268.95	-0.00186271		1268.95	-0.00154633		1268.95	-0.0015977		1268.95	-0.00109033		1268.95	-0.00125047		1268.95	-0.00194432		1268.95	-0.000946667
	1269.43	0.00101203		1269.43	0.00185715		1269.43	0.00179852		1269.43	0.000570512		1269.43	-0.000584025		1269.43	-0.00207605		1269.43	-0.00142299		1269.43	-0.00128416		1269.43	-0.000677063		1269.43	-0.000685598		1269.43	-0.00190276		1269.43	-0.000821874
	1269.92	0.00119131		1269.92	0.00199647		1269.92	0.00235791		1269.92	0.000634649		1269.92	-0.000414971		1269.92	-0.00216893		1269.92	-0.00119221		1269.92	-0.000947328		1269.92	-0.000288336		1269.92	-8.74319e-05		1269.92	-0.00174972		1269.92	-0.000597823
	1270.4	0.00139071		1270.4	0.00214482		1270.4	0.00291752		1270.4	0.000681472		1270.4	-0.000242109		1270.4	-0.00213767		1270.4	-0.00089069		1270.4	-0.000631473		1270.4	7.95218e-07		1270.4	0.000451487		1270.4	-0.00151582		1270.4	-0.000332605
	1270.88	0.00158544		1270.88	0.00226784		1270.88	0.00334628		1270.88	0.000673076		1270.88	-0.000122744		1270.88	-0.00202566		1270.88	-0.00059104		1270.88	-0.000389813		1270.88	0.000130966		1270.88	0.000830038		1270.88	-0.00126672		1270.88	-0.000126289
	1271.36	0.00173145		1271.36	0.00231774		1271.36	0.00353273		1271.36	0.000565469		1271.36	-0.000118438		1271.36	-0.00190883		1271.36	-0.000384019		1271.36	-0.000272012		1271.36	7.27353e-05		1271.36	0.000962151		1271.36	-0.00108088		1271.36	-9.04796e-05
	1271.85	0.00177803		1271.85	0.00224905		1271.85	0.00341587		1271.85	0.000329975		1271.85	-0.000274661		1271.85	-0.00186881		1271.85	-0.000351344		1271.85	-0.000310885		1271.85	-0.000169944		1271.85	0.000801589		1271.85	-0.00102383		1271.85	-0.000307772
	1272.33	0.00168661		1272.33	0.00203405		1272.33	0.00299572		1272.33	-3.24039e-05		1272.33	-0.000600504		1272.33	-0.00196154		1272.33	-0.000536903		1272.33	-0.00051291		1272.33	-0.000560068		1272.33	0.000355641		1272.33	-0.00112629		1272.33	-0.000797896
	1272.81	0.00145147		1272.81	0.00167394		1272.81	0.00233063		1272.81	-0.000486268		1272.81	-0.00106577		1272.81	-0.00219893		1272.81	-0.00093126		1272.81	-0.000856763		1272.81	-0.00104088		1272.81	-0.000312242		1272.81	-0.00137692		1272.81	-0.00150624
	1273.29	0.00110972		1273.29	0.00120228		1273.29	0.00151917		1273.29	-0.000968653		1273.29	-0.00160539		1273.29	-0.00254415		1273.29	-0.00146566		1273.29	-0.00129629		1273.29	-0.00154837		1273.29	-0.00109598		1273.29	-0.00172689		1273.29	-0.00231433
	1273.77	0.000739684		1273.77	0.000679647		1273.77	0.000680045		1273.77	-0.0014048		1273.77	-0.00213613		1273.77	-0.00292422		1273.77	-0.00202592		1273.77	-0.00176936		1273.77	-0.00202338		1273.77	-0.00186868		1273.77	-0.00210299		1273.77	-0.00306947
	1274.26	0.000438087		1274.26	0.000179458		1274.26	-7.18618e-05		1274.26	-0.00172504		1274.26	-0.00257581		1274.26	-0.0032514		1274.26	-0.002481		1274.26	-0.00220955		1274.26	-0.00241896		1274.26	-0.00251111		1274.26	-0.00242674		1274.26	-0.00362444
	1274.74	0.000293236		1274.74	-0.000226015		1274.74	-0.000642127		1274.74	-0.00187742		1274.74	-0.00285816		1274.74	-0.00344595		1274.74	-0.00271518		1274.74	-0.0025539		1274.74	-0.00269931		1274.74	-0.00293409		1274.74	-0.00262683		1274.74	-0.0038694
	1275.22	0.000357431		1275.22	-0.000478788		1275.22	-0.000968719		1275.22	-0.00183311		1275.22	-0.00294298		1275.22	-0.00345095		1275.22	-0.00265702		1275.22	-0.00275034		1275.22	-0.00283337		1275.22	-0.00309072		1275.22	-0.00264896		1275.22	-0.0037507
	1275.7	0.000634218		1275.7	-0.00054286		1275.7	-0.00102713		1275.7	-0.00158486		1275.7	-0.00281935		1275.7	-0.00324009		1275.7	-0.0022962		1275.7	-0.00276174		1275.7	-0.00279255		1275.7	-0.00297816		1275.7	-0.00246021		1275.7	-0.00327288
	1276.18	0.00107773		1276.18	-0.000406166		1276.18	-0.000832457		1276.18	-0.00114651		1276.18	-0.00250251		1276.18	-0.00281872		1276.18	-0.00168537		1276.18	-0.00257067		1276.18	-0.00254955		1276.18	-0.00263144		1276.18	-0.00205286		1276.18	-0.00249049
	1276.67	0.00161061		1276.67	-8.0972e-05		1276.67	-0.000435858		1276.67	-0.000551994		1276.67	-0.00203149		1276.67	-0.00222112		1276.67	-0.000928119		1276.67	-0.00218584		1276.67	-0.00208887		1276.67	-0.00211113		1276.67	-0.00144703		1276.67	-0.00149617
	1277.15	0.00214445		1277.15	0.000397393		1277.15	8.27767e-05		1277.15	0.000142467		1277.15	-0.00146114		1277.15	-0.0015073		1277.15	-0.00015451		1277.15	-0.00164675		1277.15	-0.00141986		1277.15	-0.00149389		1277.15	-0.000695655		1277.15	-0.000406464
	1277.63	0.00260511		1277.63	0.000973608		1277.63	0.000629738		1277.63	0.000859585		1277.63	-0.000856597		1277.63	-0.00075652		1277.63	0.000510232		1277.63	-0.00102621		1277.63	-0.000588724		1277.63	-0.000859739		1277.63	0.000117343		1277.63	0.000651639
	1278.11	0.00294601		1278.11	0.00157829		1278.11	0.00111646		1278.11	0.00150909		1278.11	-0.000279329		1278.11	-5.35744e-05		1278.11	0.000976198		1278.11	-0.000420863		1278.11	0.000320392		1278.11	-0.000281647		1278.11	0.000888935		1278.11	0.00155777
	1278.6	0.00314972		1278.6	0.00213356		1278.6	0.00147814		1278.6	0.00200179		1278.6	0.000219038		1278.6	0.000522606		1278.6	0.0012052		1278.6	6.35889e-05		1278.6	0.00119762		1278.6	0.000180883		1278.6	0.00151278		1278.6	0.00221275
	1279.08	0.00321924		1279.08	0.00256461		1279.08	0.00168166		1279.08	0.00226801		1279.08	0.000604819		1279.08	0.000914999		1279.08	0.00121068		1279.08	0.000334252		1279.08	0.0019315		1279.08	0.000486647		1279.08	0.00190331		1279.08	0.00255121
	1279.56	0.00316854		1279.56	0.00280799		1279.56	0.00172487		1279.56	0.00227433		1279.56	0.000861278		1279.56	0.00109733		1279.56	0.00104225		1279.56	0.000330273		1279.56	0.00243071		1279.56	0.00061192		1279.56	0.00201205		1279.56	0.00254984
	1280.04	0.003015		1280.04	0.00282343		1280.04	0.00162535		1280.04	0.00203295		1280.04	0.000987489		1280.04	0.00107816		1280.04	0.00076554		1280.04	3.91993e-05		1280.04	0.00264484		1280.04	0.000549279		1280.04	0.00183659		1280.04	0.0022325
	1280.52	0.00278365		1280.52	0.00260301		1280.52	0.00140942		1280.52	0.00160213		1280.52	0.000991109		1280.52	0.0008976		1280.52	0.000442233		1280.52	-0.000498844		1280.52	0.00257024		1280.52	0.000308886		1280.52	0.00142172		1280.52	0.00166646
	1281.01	0.00251258		1281.01	0.00217845		1281.01	0.00110311		1281.01	0.00107527		1281.01	0.000888901		1281.01	0.000618788		1281.01	0.000119564		1281.01	-0.00119562		1281.01	0.00224869		1281.01	-8.41192e-05		1281.01	0.000847833		1281.01	0.000953716
	1281.49	0.00225262		1281.49	0.0016184		1281.49	0.000729893		1281.49	0.000556511		1281.49	0.000702114		1281.49	0.000310113		1281.49	-0.000174548		1281.49	-0.00193409		1281.49	0.00174985		1281.49	-0.000588923		1281.49	0.000209259		1281.49	0.000208231
	1281.97	0.00206052		1281.97	0.00101482		1281.97	0.000314854		1281.97	0.000134346		1281.97	0.000457822		1281.97	2.98879e-05		1281.97	-0.000428411		1281.97	-0.00259603		1281.97	0.00115184		1281.97	-0.00115478		1281.97	-0.000408748		1281.97	-0.000470613
	1282.45	0.00198269		1282.45	0.000462632		1282.45	-0.000107672		1282.45	-0.000140068		1282.45	0.000187148		1282.45	-0.000187564		1282.45	-0.000641597		1282.45	-0.00309069		1282.45	0.000521843		1282.45	-0.00172616		1282.45	-0.000947791		1282.45	-0.00102128
	1282.93	0.00203721		1282.93	3.92325e-05		1282.93	-0.000492126		1282.93	-0.000262872		1282.93	-7.66654e-05		1282.93	-0.000336544		1282.93	-0.000819757		1282.93	-0.00337251		1282.93	-9.41567e-05		1282.93	-0.00225022		1282.93	-0.0013828		1282.93	-0.00143049
	1283.42	0.00220769		1283.42	-0.000208131		1283.42	-0.000780963		1283.42	-0.000266945		1283.42	-0.00029976		1283.42	-0.000432019		1283.42	-0.000970008		1283.42	-0.00344256		1283.42	-0.000668495		1283.42	-0.00267906		1283.42	-0.00171306		1283.42	-0.00172375
	1283.9	0.0024463		1283.9	-0.000264826		1283.9	-0.000914166		1283.9	-0.000205681		1283.9	-0.000451382		1283.9	-0.000499308		1283.9	-0.00110025		1283.9	-0.00333654		1283.9	-0.00118035		1283.9	-0.00297454		1283.9	-0.00194732		1283.9	-0.00194481
	1284.38	0.00269195		1284.38	-0.00014348		1284.38	-0.000842146		1284.38	-0.000131257		1284.38	-0.000508509		1284.38	-0.000560167		1284.38	-0.00121937		1284.38	-0.00310684		1284.38	-0.0016076		1284.38	-0.00310924		1284.38	-0.00208775		1284.38	-0.00212996
	1284.86	0.0028915		1284.86	0.000125828		1284.86	-0.000540643		1284.86	-7.84212e-05		1284.86	-0.000459227		1284.86	-0.000623764		1284.86	-0.00133497		1284.86	-0.00280144		1284.86	-0.00192044		1284.86	-0.00307203		1284.86	-0.00212396		1284.86	-0.00228948
	1285.34	0.00301861		1285.34	0.00050446		1285.34	-2.11721e-05		1285.34	-5.71525e-05		1285.34	-0.000307209		1285.34	-0.000684672		1285.34	-0.00145176		1285.34	-0.00245135		1285.34	-0.00208828		1285.34	-0.00287139		1285.34	-0.00203664		1285.34	-0.00240291
	1285.83	0.003079		1285.83	0.000952621		1285.83	0.000668364		1285.83	-5.46015e-05		1285.83	-7.12323e-05		1285.83	-0.00072503		1285.83	-0.00156755		1285.83	-0.00206401		1285.83	-0.00208914		1285.83	-0.00253701		1285.83	-0.00180955		1285.83	-0.00242974
	1286.31	0.00310316		1286.31	0.00143309		1286.31	0.00145427		1286.31	-4.49274e-05		1286.31	0.000216684		1286.31	-0.000722549		1286.31	-0.00167098		1286.31	-0.00162998		1286.31	-0.00192222		1286.31	-0.0021144		1286.31	-0.00144545		1286.31	-0.00232995
	1286.79	0.00312479		1286.79	0.00191173		1286.79	0.00225192		1286.79	-3.37966e-06		1286.79	0.000517033		1286.79	-0.000658967		1286.79	-0.00174256		1286.79	-0.00113719		1286.79	-0.00161255		1286.79	-0.0016552		1286.79	-0.000976554		1286.79	-0.00208967
	1287.27	0.0031639		1287.27	0.00235708		1287.27	0.00298481		1287.27	8.52623e-05		1287.27	0.000788344		1287.27	-0.00052446		1287.27	-0.0017584		1287.27	-0.000586838		1287.27	-0.00121112		1287.27	-0.00120338		1287.27	-0.000464622		1287.27	-0.00173237
	1287.76	0.00321731		1287.76	0.00274066		1287.76	0.00359504		1287.76	0.000220928		1287.76	0.000994961		1287.76	-0.00032191		1287.76	-0.00169831		1287.76	-3.87666e-06		1287.76	-0.000782715		1287.76	-0.000785229		1287.76	1.01723e-05		1287.76	-0.00131783
	1288.24	0.00326621		1288.24	0.00304129		1288.24	0.00405225		1288.24	0.000390428		1288.24	0.00111075		1288.24	-6.5998e-05		1288.24	-0.00155468		1288.24	0.000563545		1288.24	-0.000393653		1288.24	-0.000403485		1288.24	0.00037063		1288.24	-0.000923986
	1288.72	0.00329222		1288.72	0.00325109		1288.72	0.00435249		1288.72	0.000575986		1288.72	0.00112732		1288.72	0.000220331		1288.72	-0.00133573		1288.72	0.00105714		1288.72	-9.49518e-05		1288.72	-4.13162e-05		1288.72	0.000568223		1288.72	-0.000617114
	1289.2	0.00329613		1289.2	0.00337903		1289.2	0.00451611		1289.2	0.000762221		1289.2	0.00105454		1289.2	0.000509635		1289.2	-0.00106452		1289.2	0.00142976		1289.2	8.7549e-05		1289.2	0.000325399		1289.2	0.000599145		1289.2	-0.000425729
	1289.68	0.0033004		1289.68	0.00344699		1289.68	0.00457604		1289.68	0.000941895		1289.68	0.000920378		1289.68	0.000773739		1289.68	-0.00077233		1289.68	0.0016614		1289.68	0.000154797		1289.68	0.000711141		1289.68	0.000504693		1289.68	-0.000331843
	1290.17	0.00334097		1290.17	0.00348143		1290.17	0.00456935		1290.17	0.00111739		1290.17	0.000764478		1290.17	0.000987622		1290.17	-0.000487923		1290.17	0.00176489		1290.17	0.000128811		1290.17	0.00110816		1290.17	0.00035521		1290.17	-0.000280786
	1290.65	0.00344602		1290.65	0.00350347		1290.65	0.00452672		1290.65	0.00129638		1290.65	0.000630999		1290.65	0.00113234		1290.65	-0.000229856		1290.65	0.0017774		1290.65	4.24799e-05		1290.65	0.00148292		1290.65	0.000224143		1290.65	-0.000206873
	1291.13	0.00361963		1291.13	0.00352024		1291.13	0.00446673		1291.13	0.00148711		1291.13	0.000560194		1291.13	0.00119623		1291.13	-4.04233e-06		1291.13	0.00174213		1291.13	-7.16299e-05		1291.13	0.00178458		1291.13	0.000163315		1291.13	-6.08961e-05
	1291.61	0.00383268		1291.61	0.00352321		1291.61	0.00439262		1291.61	0.00169074		1291.61	0.00058156		1291.61	0.00117659		1291.61	0.000193811		1291.61	0.0016925		1291.61	-0.000186339		1291.61	0.00195905		1291.61	0.000188375		1291.61	0.000172497
	1292.09	0.0040346		1292.09	0.00349532		1292.09	0.00429677		1292.09	0.00189981		1292.09	0.000707623		1292.09	0.00108185		1292.09	0.000372255		1292.09	0.00164098		1292.09	-0.000283038		1292.09	0.00197217		1292.09	0.000278846		1292.09	0.000471455
	1292.58	0.00417214		1292.58	0.00342108		1292.58	0.00416658		1292.58	0.00209867		1292.58	0.000934722		1292.58	0.000932996		1292.58	0.000540487		1292.58	0.00158225		1292.58	-0.000350615		1292.58	0.00182428		1292.58	0.00039013		1292.58	0.000791
	1293.06	0.00421563		1293.06	0.00329659		1293.06	0.0039956		1293.06	0.00226844		1293.06	0.00124158		1293.06	0.000758902		1293.06	0.000704802		1293.06	0.00150131		1293.06	-0.000383423		1293.06	0.00155687		1293.06	0.000474407		1293.06	0.00108417
	1293.54	0.00417294		1293.54	0.00313787		1293.54	0.0037923		1293.54	0.00239459		1293.54	0.00159887		1293.54	0.000594102		1293.54	0.000871039		1293.54	0.00139107		1293.54	-0.000378855		1293.54	0.00124291		1293.54	0.000505555		1293.54	0.00132539
	1294.02	0.00408644		1294.02	0.00297787		1294.02	0.00358642		1294.02	0.0024743		1294.02	0.00197427		1294.02	0.000469763		1294.02	0.00104704		1294.02	0.00125956		1294.02	-0.000333134		1294.02	0.000966667		1294.02	0.000491855		1294.02	0.0015206
	1294.51	0.00401466		1294.51	0.00286208		1294.51	0.00342545		1294.51	0.00252035		1294.51	0.00234182		1294.51	0.000410261		1294.51	0.00124534		1294.51	0.0011339		1294.51	-0.000238202		1294.51	0.000799597		1294.51	0.000479051		1294.51	0.00170191
	1294.99	0.00400894		1294.99	0.00283867		1294.99	0.00336785		1294.99	0.00256108		1294.99	0.00268412		1294.99	0.000431387		1294.99	0.00148339		1294.99	0.00105092		1294.99	-8.05082e-05		1294.99	0.000786286		1294.99	0.000537667		1294.99	0.00191243
	1295.47	0.00409246		1295.47	0.00294951		1295.47	0.00346386		1295.47	0.00263394		1295.47	0.00299252		1295.47	0.000540189		1295.47	0.00177743		1295.47	0.00104352		1295.47	0.000158178		1295.47	0.000935553		1295.47	0.000738091		1295.47	0.00218421
	1295.95	0.00425661		1295.95	0.00322188		1295.95	0.00374073		1295.95	0.00277571		1295.95	0.00326488		1295.95	0.000738357		1295.95	0.00213446		1295.95	0.0011254		1295.95	0.000495139		1295.95	0.00122626		1295.95	0.00112709		1295.95	0.00252398
	1296.43	0.00446847		1296.43	0.00366143		1296.43	0.00418505		1296.43	0.0030102		1296.43	0.00350461		1296.43	0.00102312		1296.43	0.00254395		1296.43	0.00128628		1296.43	0.000939039		1296.43	0.0016174		1296.43	0.00170521		1296.43	0.00290985
	1296.91	0.0046889		1296.91	0.00424698		1296.91	0.00474076		1296.91	0.00333653		1296.91	0.0037164		1296.91	0.00138715		1296.91	0.00297433		1296.91	0.00149326		1296.91	0.00148		1296.91	0.00206052		1296.91	0.00241945		1296.91	0.00330087
	1297.4	0.00489005		1297.4	0.00493076		1297.4	0.00532183		1297.4	0.00372739		1297.4	0.00390753		1297.4	0.00181995		1297.4	0.00337887		1297.4	0.00170773		1297.4	0.00208788		1297.4	0.00251255		1297.4	0.00317442		1297.4	0.00365461
	1297.88	0.00506406		1297.88	0.00564218		1297.88	0.00583745		1297.88	0.0041353		1297.88	0.00408416		1297.88	0.00230611		1297.88	0.0037055		1297.88	0.00190101		1297.88	0.00271319		1297.88	0.00294117		1297.88	0.00385915		1297.88	0.00394314
	1298.36	0.00521823		1298.36	0.00629938		1298.36	0.0062177		1298.36	0.00450751		1298.36	0.00425073		1298.36	0.00282663		1298.36	0.00391335		1298.36	0.00206824		1298.36	0.00329876		1298.36	0.00332424		1298.36	0.00437873		1298.36	0.00415895
	1298.84	0.00536409		1298.84	0.00682084		1298.84	0.00643203		1298.84	0.00480297		1298.84	0.00440698		1298.84	0.00335846		1298.84	0.00398192		1298.84	0.00222777		1298.84	0.00379046		1298.84	0.00364683		1298.84	0.00467741		1298.84	0.00430922
	1299.33	0.00550605		1299.33	0.00714254		1299.33	0.00649212		1299.33	0.00500547		1299.33	0.00454742		1299.33	0.0038753		1299.33	0.00391756		1299.33	0.00241215		1299.33	0.00415076		1299.33	0.0038968		1299.33	0.00474967		1299.33	0.00440541
	1299.81	0.00563996		1299.81	0.00723191		1299.81	0.00644433		1299.81	0.00512823		1299.81	0.00466087		1299.81	0.00435212		1299.81	0.00375045		1299.81	0.00265381		1299.81	0.00436641		1299.81	0.00406787		1299.81	0.0046393		1299.81	0.00445354
	1300.29	0.00575686		1300.29	0.00710276		1300.29	0.00635082		1300.29	0.00521014		1300.29	0.00473375		1300.29	0.00476585		1300.29	0.00352842		1300.29	0.00296996		1300.29	0.0044531		1300.29	0.00416079		1300.29	0.00442613		1300.29	0.00445207
	1300.77	0.00585397		1300.77	0.00681502		1300.77	0.00627037		1300.77	0.0053015		1300.77	0.00475379		1300.77	0.00510047		1300.77	0.00330481		1300.77	0.00335579		1300.77	0.00445043		1300.77	0.00418883		1300.77	0.00420422		1300.77	0.0043972
	1301.25	0.00593911		1301.25	0.00646145		1301.25	0.00623874		1301.25	0.00544377		1301.25	0.00471439		1301.25	0.00534799		1301.25	0.00312432		1301.25	0.00378565		1301.25	0.00440979		1301.25	0.00417491		1301.25	0.00405596		1301.25	0.00429392
	1301.74	0.00602985		1301.74	0.00613811		1301.74	0.00626271		1301.74	0.00565288		1301.74	0.00461519		1301.74	0.00550672		1301.74	0.00301413		1301.74	0.00422198		1301.74	0.00437679		1301.74	0.00414537		1301.74	0.00402971		1301.74	0.0041625
	1302.22	0.00614295		1302.22	0.0059153		1302.22	0.00632285		1302.22	0.00590982		1302.22	0.00446281		1302.22	0.00557753		1302.22	0.00298101		1302.22	0.00462648		1302.22	0.00437716		1302.22	0.00412049		1302.22	0.00412945		1302.22	0.00403921
	1302.7	0.00628352		1302.7	0.0058182		1302.7	0.00638855		1302.7	0.00616826		1302.7	0.00426822		1302.7	0.00556239		1302.7	0.0030172		1302.7	0.00496927		1302.7	0.00441073		1302.7	0.00410958		1302.7	0.00431909		1302.7	0.00396835
	1303.18	0.00643979		1303.18	0.00582549		1303.18	0.00643367		1303.18	0.00637063		1303.18	0.00404704		1303.18	0.0054639		1303.18	0.00311017		1303.18	0.00523335		1303.18	0.00445696		1303.18	0.00410915		1303.18	0.00453774		1303.18	0.00398945
	1303.66	0.00658863		1303.66	0.00588665		1303.66	0.00645197		1303.66	0.00646989		1303.66	0.00381954		1303.66	0.00529305		1303.66	0.00325132		1303.66	0.00541448		1303.66	0.00448819		1303.66	0.00411246		1303.66	0.0047229		1303.66	0.00412299
	1304.15	0.00670699		1304.15	0.00594758		1304.15	0.00645822		1304.15	0.00644931		1304.15	0.00361284		1304.15	0.00507304		1304.15	0.00344001		1304.15	0.00552179		1304.15	0.00448461		1304.15	0.00411851		1304.15	0.00482947		1304.15	0.00436226
	1304.63	0.00678941		1304.63	0.00597721		1304.63	0.00648547		1304.63	0.00632971		1304.63	0.00346089		1304.63	0.00484324		1304.63	0.00368228		1304.63	0.00557666		1304.63	0.00444654		1304.63	0.00414156		1304.63	0.00484535		1304.63	0.00467336
	1305.11	0.00685184		1305.11	0.00597899		1305.11	0.00656861		1305.11	0.00616157		1305.11	0.00339967		1305.11	0.0046529		1305.11	0.00398276		1305.11	0.00561096		1305.11	0.00439563		1305.11	0.00420991		1305.11	0.00479087		1305.11	0.00500372
	1305.59	0.0069287		1305.59	0.0059852		1305.59	0.00673203		1305.59	0.0060061		1305.59	0.00346095		1305.59	0.00454999		1305.59	0.00433736		1305.59	0.00566299		1305.59	0.00436728		1305.59	0.00435938		1305.59	0.00471037		1305.59	0.00529895
	1306.08	0.00705308		1306.08	0.00603738		1306.08	0.00697641		1306.08	0.00591036		1306.08	0.00366149		1306.08	0.0045669		1306.08	0.00472598		1306.08	0.00576764		1306.08	0.00439486		1306.08	0.00461603		1306.08	0.0046531		1306.08	0.00551511
	1306.56	0.00723858		1306.56	0.00616039		1306.56	0.0072783		1306.56	0.00589299		1306.56	0.00399353		1306.56	0.00470927		1306.56	0.00511318		1306.56	0.00594704		1306.56	0.00449539		1306.56	0.00498398		1306.56	0.00465725		1306.56	0.00562814
	1307.04	0.00746541		1307.04	0.00634665		1307.04	0.00759521		1307.04	0.00594099		1307.04	0.00442037		1307.04	0.00495285		1307.04	0.00545276		1307.04	0.00620009		1307.04	0.00466231		1307.04	0.00543461		1307.04	0.00473948		1307.04	0.00563781
	1307.52	0.00768531		1307.52	0.00655469		1307.52	0.0078785		1307.52	0.00602152		1307.52	0.00487758		1307.52	0.00524955		1307.52	0.00569955		1307.52	0.00649744		1307.52	0.00486646		1307.52	0.0059116		1307.52	0.00489487		1307.52	0.0055638
	1308	0.00783829		1308	0.00672577		1308	0.0080867		1308	0.00610132		1308	0.00528812		1308	0.00554347		1308	0.00582378		1308	0.00678756		1308	0.00506849		1308	0.0063438		1308	0.00510345		1308	0.00544243
	1308.49	0.00788083		1308.49	0.00681118		1308.49	0.00819909		1308.49	0.00616728		1308.49	0.00558394		1308.49	0.00578949		1308.49	0.0058219		1308.49	0.00701274		1308.49	0.00523469		1308.49	0.00666836		1308.49	0.00534155		1308.49	0.00531991
	1308.97	0.00780664		1308.97	0.00679688		1308.97	0.00821881		1308.97	0.00623612		1308.97	0.00573194		1308.97	0.00597254		1308.97	0.00572107		1308.97	0.00713392		1308.97	0.00535316		1308.97	0.006851		1308.97	0.005593		1308.97	0.00524462
	1309.45	0.00765115		1309.45	0.00671143		1309.45	0.00816982		1309.45	0.00634965		1309.45	0.00574591		1309.45	0.00611089		1309.45	0.00557095		1309.45	0.00714756		1309.45	0.00543897		1309.45	0.00689503		1309.45	0.00585337		1309.45	0.00526018
	1309.93	0.00747627		1309.93	0.00661894		1309.93	0.00808694		1309.93	0.00655832		1309.93	0.00568441		1309.93	0.00624923		1309.93	0.00543146		1309.93	0.00709208		1309.93	0.00553028		1309.93	0.00683431		1309.93	0.00612736		1309.93	0.00540022
	1310.41	0.00734745		1310.41	0.0065963		1310.41	0.00800775		1310.41	0.00689914		1310.41	0.00563157		1310.41	0.00644067		1310.41	0.00536017		1310.41	0.00703638		1310.41	0.00567373		1310.41	0.00671958		1310.41	0.00642157		1310.41	0.00568303
	1310.9	0.00731116		1310.9	0.00671228		1310.9	0.00796698		1310.9	0.00737909		1310.9	0.00567474		1310.9	0.00672829		1310.9	0.00540338		1310.9	0.00705925		1310.9	0.00591086		1310.9	0.00660104		1310.9	0.00673465		1310.9	0.0061077
	1311.38	0.00738206		1311.38	0.00700759		1311.38	0.00799651		1311.38	0.00796158		1311.38	0.00587667		1311.38	0.00712937		1311.38	0.00558938		1311.38	0.00721931		1311.38	0.00626187		1311.38	0.00652018		1311.38	0.00705281		1311.38	0.0066471
	1311.86	0.00753975		1311.86	0.00748233		1311.86	0.0081208		1311.86	0.00856834		1311.86	0.00625548		1311.86	0.00762471		1311.86	0.00592202		1311.86	0.00752983		1311.86	0.00671726		1311.86	0.00650329		1311.86	0.00734853		1311.86	0.00724431
	1312.34	0.00773648		1312.34	0.00809048		1312.34	0.00835326		1312.34	0.00909311		1312.34	0.00677278		1312.34	0.00815864		1312.34	0.00637547		1312.34	0.00794117		1312.34	0.00723359		1312.34	0.00656155		1312.34	0.00758702		1312.34	0.00781514
	1312.83	0.00791285		1312.83	0.00874887		1312.83	0.00868822		1312.83	0.00943291		1312.83	0.00734253		1312.83	0.00865412		1312.83	0.00689372		1312.83	0.00834829		1312.83	0.0077436		1312.83	0.00669384		1312.83	0.00773608		1312.83	0.00826457
	1313.31	0.00801669		1313.31	0.00935456		1313.31	0.0090968		1313.31	0.00952265		1313.31	0.00785806		1313.31	0.00903522		1313.31	0.00739894		1313.31	0.00862475		1313.31	0.00817465		1313.31	0.00688938		1313.31	0.00777672		1313.31	0.00851126
	1313.79	0.00801413		1313.79	0.00981151		1313.79	0.00952868		1313.79	0.00935466		1313.79	0.00822958		1313.79	0.00925105		1313.79	0.0078083		1313.79	0.00867054		1313.79	0.00847109		1313.79	0.00713095		1313.79	0.00770774		1313.79	0.00850961
	1314.27	0.00789507		1314.27	0.0100481		1314.27	0.00992391		1314.27	0.00897893		1314.27	0.00840943		1314.27	0.00928747		1314.27	0.00805274		1314.27	0.00844805		1314.27	0.00860663		1314.27	0.00739793		1314.27	0.00754268		1314.27	0.00826045
	1314.75	0.00766987		1314.75	0.0100306		1314.75	0.010226		1314.75	0.00848292		1314.75	0.00839903		1314.75	0.00916572		1314.75	0.00809322		1314.75	0.00799543		1314.75	0.00858784		1314.75	0.0076664		1314.75	0.00730519		1314.75	0.00780779
	1315.24	0.00736875		1315.24	0.00976661		1315.24	0.0103978		1315.24	0.00796675		1315.24	0.00823657		1315.24	0.00893323		1315.24	0.00792615		1315.24	0.0074104		1315.24	0.00844605		1315.24	0.00791285		1315.24	0.007025		1315.24	0.00722622
	1315.72	0.00703928		1315.72	0.00930629		1315.72	0.0104292		1315.72	0.00752151		1315.72	0.00797893		1315.72	0.00865043		1315.72	0.00758691		1315.72	0.00682		1315.72	0.00822759		1315.72	0.00811432		1315.72	0.0067356		1315.72	0.00660717
	1316.2	0.0067463		1316.2	0.00874005		1316.2	0.0103404		1316.2	0.00721261		1316.2	0.00768353		1316.2	0.00838075		1316.2	0.00714422		1316.2	0.00634635		1316.2	0.00798315		1316.2	0.00825515		1316.2	0.00647369		1316.2	0.00604608
	1316.68	0.00656068		1316.68	0.00818521		1316.68	0.0101733		1316.68	0.00706709		1316.68	0.00739787		1316.68	0.0081786		1316.68	0.00668647		1316.68	0.00607259		1316.68	0.00775672		1316.68	0.00832847		1316.68	0.00627565		1316.68	0.0056262
	1317.16	0.00654275		1317.16	0.00776289		1317.16	0.00997666		1317.16	0.00706942		1317.16	0.00715177		1317.16	0.0080786		1317.16	0.00630365		1317.16	0.00602115		1317.16	0.00757774		1317.16	0.00833971		1317.16	0.00616964		1317.16	0.00540579
	1317.65	0.00671679		1317.65	0.00756685		1317.65	0.0097842		1317.65	0.00716433		1317.65	0.00696018		1317.65	0.00808613		1317.65	0.00606412		1317.65	0.00614816		1317.65	0.00745439		1317.65	0.00830243		1317.65	0.00616812		1317.65	0.00540445
	1318.13	0.00705275		1318.13	0.00763149		1318.13	0.00959944		1318.13	0.00727227		1318.13	0.0068267		1318.13	0.00817353		1318.13	0.00599847		1318.13	0.00635825		1318.13	0.00737262		1318.13	0.00823563		1318.13	0.00625968		1318.13	0.00559874
	1318.61	0.00746255		1318.61	0.00791636		1318.61	0.00939062		1318.61	0.00731416		1318.61	0.00674956		1318.61	0.00828564		1318.61	0.00609443		1318.61	0.00653827		1318.61	0.00730361		1318.61	0.00815618		1318.61	0.00640963		1318.61	0.00592705
	1319.09	0.00782456		1319.09	0.00831607		1319.09	0.00910816		1319.09	0.00723962		1319.09	0.00672637		1319.09	0.0083566		1319.09	0.0063052		1319.09	0.00659697		1319.09	0.00721567		1319.09	0.00807634		1319.09	0.00657016		1319.09	0.00630564
	1319.58	0.00802459		1319.58	0.00869532		1319.58	0.00870959		1319.58	0.00704658		1319.58	0.00675347		1319.58	0.00833245		1319.58	0.00657053		1319.58	0.00649727		1319.58	0.00708666		1319.58	0.00800238		1319.58	0.00669606		1319.58	0.00665201
	1320.06	0.00800475		1320.06	0.00893905		1320.06	0.00818711		1320.06	0.00678005		1320.06	0.00682344		1320.06	0.00819001		1320.06	0.00684027		1320.06	0.00626627		1320.06	0.0069123		1320.06	0.00793685		1320.06	0.00676262		1320.06	0.00690806
	1320.54	0.00778232		1320.54	0.00899057		1320.54	0.00757872		1320.54	0.00651254		1320.54	0.0069251		1320.54	0.00794559		1320.54	0.00708797		1320.54	0.0059763		1320.54	0.00670474		1320.54	0.00788117		1320.54	0.00677268		1320.54	0.00705079
	1321.02	0.00743737		1321.02	0.00885704		1321.02	0.00695759		1321.02	0.00631327		1321.02	0.00704157		1321.02	0.00764377		1321.02	0.00730991		1321.02	0.00571187		1321.02	0.00648368		1321.02	0.00783741		1321.02	0.00675084		1321.02	0.00708733
	1321.5	0.00707588		1321.5	0.00859223		1321.5	0.00641235		1321.5	0.00622553		1321.5	0.00715551		1321.5	0.00734239		1321.5	0.00751389		1321.5	0.00554061		1321.5	0.00626936		1321.5	0.00780938		1321.5	0.00673112		1321.5	0.00704221
	1321.99	0.00679133		1321.99	0.00826214		1321.99	0.00602424		1321.99	0.00625814		1321.99	0.00725084		1321.99	0.00709437		1321.99	0.00770393		1321.99	0.0054984		1321.99	0.00607622		1321.99	0.00780347		1321.99	0.00674152		1321.99	0.00694119
	1322.47	0.00663738		1322.47	0.00792159		1322.47	0.00585142		1322.47	0.00638966		1322.47	0.00731665		1322.47	0.00693728		1322.47	0.00787226		1322.47	0.00559048		1322.47	0.0059159		1322.47	0.00782695		1322.47	0.00679658		1322.47	0.00680402
	1322.95	0.0066213		1322.95	0.00760222		1322.95	0.00592034		1322.95	0.0065818		1322.95	0.00734782		1322.95	0.00688807		1322.95	0.00799847		1322.95	0.00579947		1322.95	0.00580121		1322.95	0.00788981		1322.95	0.00689618		1322.95	0.00664548
	1323.43	0.0067074		1323.43	0.00731318		1323.43	0.00621682		1323.43	0.00679389		1323.43	0.00734539		1323.43	0.00694079		1323.43	0.00805693		1323.43	0.00609802		1323.43	0.00574853		1323.43	0.00799931		1323.43	0.00702729		1323.43	0.00647901
	1323.91	0.00683717		1323.91	0.0070514		1323.91	0.00668714		1323.91	0.00699473		1323.91	0.00731355		1323.91	0.00706868		1323.91	0.00802861		1323.91	0.00645698		1323.91	0.00577774		1323.91	0.00815878		1323.91	0.00717137		1323.91	0.00632419
	1324.4	0.00694729		1324.4	0.00681267		1324.4	0.00724313		1324.4	0.00716901		1324.4	0.00725789		1324.4	0.00723009		1324.4	0.00790843		1324.4	0.00685222		1324.4	0.00590525		1324.4	0.00836201		1324.4	0.00731075		1324.4	0.00620741
	1324.88	0.00699099		1324.88	0.00659842		1324.88	0.0077805		1324.88	0.0073149		1324.88	0.00718124		1324.88	0.00737663		1324.88	0.00770855		1324.88	0.00726277		1324.88	0.00613536		1324.88	0.00859237		1324.88	0.00743198		1324.88	0.00615888
	1325.36	0.00694311		1325.36	0.00641521		1325.36	0.00819565		1325.36	0.00743376		1325.36	0.00708515		1325.36	0.00746376		1325.36	0.00745146		1325.36	0.00766656		1325.36	0.00645325		1325.36	0.00882393		1325.36	0.00752562		1325.36	0.00620513
	1325.84	0.00680186		1325.84	0.00627017		1325.84	0.00840727		1325.84	0.00752248		1325.84	0.00697035		1325.84	0.00746049		1325.84	0.00716181		1325.84	0.00803425		1325.84	0.00682246		1325.84	0.00902981		1325.84	0.00758358		1325.84	0.00636014
	1326.33	0.0065781		1326.33	0.00616154		1326.33	0.00836677		1326.33	0.0075681		1326.33	0.00684117		1326.33	0.00735405		1326.33	0.00685969		1326.33	0.00832678		1326.33	0.00719131		1326.33	0.00918908		1326.33	0.00759551		1326.33	0.0066216
	1326.81	0.00629125		1326.81	0.00607551		1326.81	0.00806837		1326.81	0.00755121		1326.81	0.00670582		1326.81	0.00715325		1326.81	0.00655734		1326.81	0.00849829		1326.81	0.00750148		1326.81	0.00929671		1326.81	0.00755104		1326.81	0.00696722
	1327.29	0.00596508		1327.29	0.00598607		1327.29	0.00754942		1327.29	0.00745341		1327.29	0.00657618		1327.29	0.00688534		1327.29	0.00626277		1327.29	0.00850934		1327.29	0.00770238		1327.29	0.00936445		1327.29	0.0074436		1327.29	0.00735965
	1327.77	0.00562469		1327.77	0.00585985		1327.77	0.00688386		1327.77	0.00726419		1327.77	0.00645859		1327.77	0.00658631		1327.77	0.0059804		1327.77	0.00833985		1327.77	0.00776154		1327.77	0.00941608		1327.77	0.00727362		1327.77	0.00775105
	1328.25	0.00529117		1328.25	0.0056642		1328.25	0.00616389		1328.25	0.00698358		1328.25	0.00634796		1328.25	0.00628805		1328.25	0.00571328		1328.25	0.00799982		1328.25	0.00767179		1328.25	0.0094724		1328.25	0.00705255		1328.25	0.00809241
	1328.74	0.00497239		1328.74	0.00537167		1328.74	0.00547444		1328.74	0.00661608		1328.74	0.00621968		1328.74	0.00600203		1328.74	0.0054589		1328.74	0.00752801		1328.74	0.00744647		1328.74	0.00953417		1328.74	0.00679866		1328.74	0.008341
	1329.22	0.00465635		1329.22	0.00496625		1329.22	0.00487219		1329.22	0.00616339		1329.22	0.00603479		1329.22	0.00571375		1329.22	0.00520994		1329.22	0.006982		1329.22	0.00711088		1329.22	0.00957126		1329.22	0.0065335		1329.22	0.00846609
	1329.7	0.00431186		1329.7	0.00444407		1329.7	0.00437692		1329.7	0.00562083		1329.7	0.00574937		1329.7	0.00538758		1329.7	0.00495291		1329.7	0.00642039		1329.7	0.00669003		1329.7	0.00952614		1329.7	0.00627659		1329.7	0.00845068
	1330.18	0.00389813		1330.18	0.00381777		1330.18	0.00397784		1330.18	0.00498492		1330.18	0.00533605		1330.18	0.00498589		1330.18	0.00467785		1330.18	0.00589427		1330.18	0.00620765		1330.18	0.00933212		1330.18	0.00604598		1330.18	0.00829544
	1330.66	0.00338725		1330.66	0.00312165		1330.66	0.00365241		1330.66	0.00426776		1330.66	0.00480065		1330.66	0.00449408		1330.66	0.00438402		1330.66	0.00544102		1330.66	0.00568874		1330.66	0.00894463		1330.66	0.00586361		1330.66	0.00802098
	1331.15	0.00278348		1331.15	0.00241455		1331.15	0.00338237		1331.15	0.00351496		1331.15	0.00419518		1331.15	0.00394029		1331.15	0.00409058		1331.15	0.00508625		1331.15	0.0051693		1331.15	0.00836819		1331.15	0.00575854		1331.15	0.0076722
	1331.63	0.00213569		1331.63	0.00177277		1331.63	0.00316631		1331.63	0.00280859		1331.63	0.0036092		1331.63	0.00339927		1331.63	0.00383455		1331.63	0.00484756		1331.63	0.00469704		1331.63	0.00766795		1331.63	0.00576643		1331.63	0.00731304
	1332.11	0.00152911		1332.11	0.00127405		1332.11	0.00301654		1332.11	0.00225428		1332.11	0.00314761		1332.11	0.00297553		1332.11	0.00366149		1332.11	0.00473673		1332.11	0.00432766		1332.11	0.00695563		1332.11	0.00592097		1332.11	0.00701506
	1332.59	0.0010574		1332.59	0.000973342		1332.59	0.00294741		1332.59	0.00195073		1332.59	0.00289504		1332.59	0.00276727		1332.59	0.0036064		1332.59	0.00475747		1332.59	0.00410901		1332.59	0.00635062		1332.59	0.00623968		1332.59	0.00683805
	1333.08	0.000787979		1333.08	0.000883689		1333.08	0.00295929		1333.08	0.00195586		1333.08	0.00288934		1333.08	0.00283077		1333.08	0.00367666		1333.08	0.00490097		1333.08	0.00406623		1333.08	0.0059369		1333.08	0.00670854		1333.08	0.00681031
	1333.56	0.0007361		1333.56	0.000968958		1333.56	0.00302825		1333.56	0.00226601		1333.56	0.0031102		1333.56	0.00315816		1333.56	0.00384217		1333.56	0.0051411		1333.56	0.0041901		1333.56	0.00573624		1333.56	0.00727557		1333.56	0.00692055
	1334.04	0.000856166		1334.04	0.00114902		1334.04	0.0031073		1334.04	0.00281032		1334.04	0.00348671		1334.04	0.00367546		1334.04	0.00404055		1334.04	0.00543266		1334.04	0.00443885		1334.04	0.00570509		1334.04	0.00785192		1334.04	0.0071201
	1334.52	0.00105278		1334.52	0.00131832		1334.52	0.0031384		1334.52	0.00346352		1334.52	0.00391669		1334.52	0.00425892		1334.52	0.0041888		1334.52	0.00571358		1334.52	0.00474518		1334.52	0.00575467		1334.52	0.00832556		1334.52	0.00733488
	1335	0.00120427		1335	0.00137116		1335	0.00306976		1335	0.00407429		1335	0.00429376		1335	0.00476551		1335	0.00420733		1335	0.00591422		1335	0.00503225		1335	0.00578241		1335	0.00858405		1335	0.0074848
	1335.48	0.00119816		1335.48	0.00123095		1335.48	0.00287706		1335.48	0.00450215		1335.48	0.00453379		1335.48	0.00507103		1335.48	0.00404496		1335.48	0.00597512		1335.48	0.00523325		1335.48	0.00570985		1335.48	0.00854387		1335.48	0.00750735
	1335.97	0.000959826		1335.97	0.000870906		1335.97	0.00257351		1335.97	0.00465434		1335.97	0.00459372		1335.97	0.00510409		1335.97	0.00369551		1335.97	0.00586263		1335.97	0.00530777		1335.97	0.00550548		1335.97	0.00817303		1335.97	0.00737259
	1336.45	0.000471654		1336.45	0.000322779		1336.45	0.00221122		1336.45	0.00450848		1336.45	0.00447674		1336.45	0.00486374		1336.45	0.00320342		1336.45	0.00558065		1336.45	0.00525052		1336.45	0.00519046		1336.45	0.0075004		1336.45	0.00709077
	1336.93	-0.0002283		1336.93	-0.000330585		1336.93	0.001867		1336.93	0.00411092		1336.93	0.00422255		1336.93	0.00441632		1336.93	0.00265201		1336.93	0.00517172		1336.93	0.00508837		1336.93	0.00482236		1336.93	0.00660814		1336.93	0.00670531
	1337.41	-0.00105605		1337.41	-0.000972951		1337.41	0.00162465		1337.41	0.00355819		1337.41	0.00388747		1337.41	0.00387176		1337.41	0.00214405		1337.41	0.00470756		1337.41	0.00486666		1337.41	0.00446824		1337.41	0.0056126		1337.41	0.00627834
	1337.9	-0.00189698		1337.9	-0.00147471		1337.9	0.00155192		1337.9	0.00296763		1337.9	0.00352906		1337.9	0.00335609		1337.9	0.00177969		1337.9	0.00427505		1337.9	0.00463495		1337.9	0.00417615		1337.9	0.00464516		1337.9	0.0058763
	1338.38	-0.00261405		1338.38	-0.00171718		1338.38	0.00168162		1338.38	0.00244774		1338.38	0.00319294		1338.38	0.00297987		1338.38	0.00162904		1338.38	0.00395481		1338.38	0.00443084		1338.38	0.00396323		1338.38	0.00383766		1338.38	0.00555689
	1338.86	-0.00307394		1338.86	-0.00162761		1338.86	0.00198815		1338.86	0.00206954		1338.86	0.00290972		1338.86	0.00280472		1338.86	0.00170591		1338.86	0.00379731		1338.86	0.00426796		1338.86	0.00381279		1338.86	0.00329669		1338.86	0.00535547
	1339.34	-0.00318013		1339.34	-0.00121515		1339.34	0.0023872		1339.34	0.00184743		1339.34	0.00269425		1339.34	0.0028198		1339.34	0.0019518		1339.34	0.00379932		1339.34	0.00413089		1339.34	0.00369685		1339.34	0.00307183		1339.34	0.00527544
	1339.82	-0.00292047		1339.82	-0.00058022		1339.82	0.00275854		1339.82	0.00173867		1339.82	0.00254911		1339.82	0.00294574		1339.82	0.00225229		1339.82	0.00390302		1339.82	0.00398142		1339.82	0.00359865		1339.82	0.00313029		1339.82	0.00528396
	1340.31	-0.00237263		1340.31	0.000124668		1340.31	0.00300019		1340.31	0.00167597		1340.31	0.0024648		1340.31	0.00307673		1340.31	0.00249006		1340.31	0.00402516		1340.31	0.00377893		1340.31	0.00352535		1340.31	0.00336915		1340.31	0.00532609
	1340.79	-0.00166824		1340.79	0.000761591		1340.79	0.00306038		1340.79	0.00160276		1340.79	0.00242571		1340.79	0.00313063		1340.79	0.00259391		1340.79	0.00409841		1340.79	0.00349673		1340.79	0.00349405		1340.79	0.00366203		1340.79	0.00534487
	1341.27	-0.000938336		1341.27	0.00124497		1341.27	0.00294034		1341.27	0.0014916		1341.27	0.00241132		1341.27	0.00307286		1341.27	0.00255171		1341.27	0.00409276		1341.27	0.00312672		1341.27	0.00351192		1341.27	0.00390355		1341.27	0.00529711
	1341.75	-0.000285257		1341.75	0.00154271		1341.75	0.00266901		1341.75	0.00133892		1341.75	0.00239879		1341.75	0.00290771		1341.75	0.00239363		1341.75	0.00401105		1341.75	0.00267788		1341.75	0.00356226		1341.75	0.00402473		1341.75	0.0051575
	1342.23	0.000223381		1342.23	0.00165608		1342.23	0.00228759		1342.23	0.00115241		1342.23	0.00236374		1342.23	0.00266151		1342.23	0.00216736		1342.23	0.00387353		1342.23	0.00217019		1342.23	0.0036083		1342.23	0.00399099		1342.23	0.00491612
	1342.72	0.000550772		1342.72	0.00160659		1342.72	0.00183968		1342.72	0.000942791		1342.72	0.00228509		1342.72	0.00236837		1342.72	0.00192551		1342.72	0.00370724		1342.72	0.00163552		1342.72	0.00360306		1342.72	0.00379404		1342.72	0.00457785
	1343.2	0.000686251		1343.2	0.00142744		1343.2	0.00137046		1343.2	0.00071977		1343.2	0.00214655		1343.2	0.00206198		1343.2	0.00171442		1343.2	0.00353835		1343.2	0.00111257		1343.2	0.00350417		1343.2	0.00344806		1343.2	0.0041618
	1343.68	0.000646562		1343.68	0.0011627		1343.68	0.000925558		1343.68	0.000494641		1343.68	0.00194275		1343.68	0.00177111		1343.68	0.00157064		1343.68	0.00339055		1343.68	0.000645467		1343.68	0.00328778		1343.68	0.00298828		1343.68	0.00370062
	1344.16	0.000472351		1344.16	0.000861643		1344.16	0.000544037		1344.16	0.0002812		1344.16	0.00167933		1344.16	0.00151298		1344.16	0.00151225		1344.16	0.00327967		1344.16	0.000272182		1344.16	0.00295809		1344.16	0.00246666		1344.16	0.00323406
	1344.65	0.000217911		1344.65	0.000572104		1344.65	0.000249538		1344.65	9.56022e-05		1344.65	0.00137289		1344.65	0.00128804		1344.65	0.00153313		1344.65	0.00320983		1344.65	1.48443e-05		1344.65	0.00254558		1344.65	0.00194151		1344.65	0.00279875
	1345.13	-6.15587e-05		1345.13	0.000328516		1345.13	4.41036e-05		1345.13	-4.46624e-05		1345.13	0.00104551		1345.13	0.00107889		1345.13	0.0016035		1345.13	0.00316974		1345.13	-0.000128375		1345.13	0.00209884		1345.13	0.00146407		1345.13	0.00241861
	1345.61	-0.000328466		1345.61	0.000144654		1345.61	-9.31629e-05		1345.61	-0.000126289		1345.61	0.000717846		1345.61	0.000854273		1345.61	0.00167547		1345.61	0.003131		1345.61	-0.00018412		1345.61	0.00166509		1345.61	0.00106464		1345.61	0.00209714
	1346.09	-0.000569267		1346.09	1.1332e-05		1346.09	-0.000196639		1346.09	-0.000143944		1346.09	0.000403196		1346.09	0.000580067		1346.09	0.00169533		1346.09	0.00304997		1346.09	-0.000196374		1346.09	0.0012776		1346.09	0.00074775		1346.09	0.00181922
	1346.57	-0.000795846		1346.57	-9.70056e-05		1346.57	-0.000301978		1346.57	-0.000103995		1346.57	0.000105976		1346.57	0.000232696		1346.57	0.00161876		1346.57	0.00287546		1346.57	-0.000213596		1346.57	0.000946112		1346.57	0.00049358		1346.57	0.00155794
	1347.06	-0.00103596		1347.06	-0.000213662		1347.06	-0.00043235		1347.06	-2.63408e-05		1347.06	-0.000178225		1347.06	-0.000191108		1347.06	0.00142106		1347.06	0.00255878		1347.06	-0.000278601		1347.06	0.000658807		1347.06	0.00026817		1347.06	0.00128452
	1347.54	-0.00131928		1347.54	-0.000367434		1347.54	-0.00059114		1347.54	5.82204e-05		1347.54	-0.000457572		1347.54	-0.000669156		1347.54	0.00110264		1347.54	0.00206824		1347.54	-0.000417653		1347.54	0.000392053		1347.54	3.67141e-05		1347.54	0.000976696
	1348.02	-0.00166408		1348.02	-0.000576315		1348.02	-0.000762705		1348.02	0.000112604		1348.02	-0.000739915		1348.02	-0.00116072		1348.02	0.000684459		1348.02	0.00139835		1348.02	-0.000640307		1348.02	0.000122182		1348.02	-0.000225617		1348.02	0.000623201
	1348.5	-0.00207028		1348.5	-0.000843899		1348.5	-0.000922201		1348.5	0.000100673		1348.5	-0.00102812		1348.5	-0.00161843		1348.5	0.000198684		1348.5	0.000577081		1348.5	-0.00093979		1348.5	-0.000165009		1348.5	-0.000526578		1348.5	0.000222718
	1348.98	-0.00251569		1348.98	-0.00116056		1348.98	-0.0010469		1348.98	-4.14174e-06		1348.98	-0.00131746		1348.98	-0.00200237		1348.98	-0.000323566		1348.98	-0.000335882		1348.98	-0.0012985		1348.98	-0.00046866		1348.98	-0.000854779		1348.98	-0.000217603
	1349.47	-0.00296256		1349.47	-0.0015071		1349.47	-0.00112768		1349.47	-0.000212271		1349.47	-0.00159595		1349.47	-0.00229205		1349.47	-0.000858449		1349.47	-0.00125866		1349.47	-0.00169088		1349.47	-0.000777192		1349.47	-0.00118511		1349.47	-0.000682224
	1349.95	-0.00336606		1349.95	-0.00185743		1349.95	-0.00117272		1349.95	-0.000515458		1349.95	-0.00184707		1349.95	-0.0024897		1349.95	-0.00139446		1349.95	-0.0021049		1349.95	-0.00208686		1349.95	-0.00107314		1349.95	-0.00148528		1349.95	-0.00114972
	1350.43	-0.00368733		1350.43	-0.00218245		1350.43	-0.00120447		1350.43	-0.000888012		1350.43	-0.00205369		1350.43	-0.00261447		1350.43	-0.00192608		1350.43	-0.00280217		1350.43	-0.00245461		1350.43	-0.001343		1350.43	-0.00172534		1350.43	-0.00159073
	1350.91	-0.00390257		1350.91	-0.0024528		1350.91	-0.00124994		1350.91	-0.00129517		1350.91	-0.00220371		1350.91	-0.00269269		1350.91	-0.00244723		1350.91	-0.00330665		1350.91	-0.00276315		1350.91	-0.00158103		1350.91	-0.00188484		1350.91	-0.00197041
	1351.39	-0.00401105		1351.39	-0.00264359		1351.39	-0.00133315		1351.39	-0.00170322		1351.39	-0.00229268		1351.39	-0.00274633		1351.39	-0.00294594		1351.39	-0.00360926		1351.39	-0.00298826		1351.39	-0.00179127		1351.39	-0.00195794		1351.39	-0.00225523
	1351.88	-0.00403147		1351.88	-0.00273846		1351.88	-0.00146612		1351.88	-0.00208601		1351.88	-0.00232481		1351.88	-0.00278728		1351.88	-0.00340022		1351.88	-0.00372935		1351.88	-0.0031152		1351.88	-0.00198156		1351.88	-0.00195319		1351.88	-0.0024185
	1352.36	-0.00399657		1352.36	-0.00273233		1352.36	-0.0016489		1352.36	-0.00242931		1352.36	-0.00231054		1352.36	-0.00281662		1352.36	-0.00377993		1352.36	-0.00370221		1352.36	-0.00314148		1352.36	-0.00215782		1352.36	-0.00189042		1352.36	-0.00244852
	1352.84	-0.00393957		1352.84	-0.00263417		1352.84	-0.0018697		1352.84	-0.00272812		1352.84	-0.00226394		1352.84	-0.00282896		1352.84	-0.00405008		1352.84	-0.0035674		1352.84	-0.00307687		1352.84	-0.00231713		1352.84	-0.00179672		1352.84	-0.00235131
	1353.32	-0.00388355		1353.32	-0.00246664		1353.32	-0.00210678		1353.32	-0.00298099		1353.32	-0.0021985		1353.32	-0.00281701		1353.32	-0.00417668		1353.32	-0.0033589		1353.32	-0.00293913		1353.32	-0.00244519		1353.32	-0.00170022		1353.32	-0.00215043
	1353.81	-0.00382963		1353.81	-0.00226407		1353.81	-0.00232949		1353.81	-0.00318516		1353.81	-0.00212597		1353.81	-0.00277494		1353.81	-0.00413697		1353.81	-0.00310519		1353.81	-0.00275005		1353.81	-0.00251684		1353.81	-0.00162404		1353.81	-0.00188326
	1354.29	-0.0037554		1354.29	-0.00206721		1354.29	-0.00250344		1354.29	-0.00333391		1354.29	-0.00205352		1354.29	-0.00269766		1354.29	-0.00392838		1354.29	-0.00282922		1354.29	-0.00253032		1354.29	-0.00250489		1354.29	-0.00158056		1354.29	-0.00159175
	1354.77	-0.00362204		1354.77	-0.00191311		1354.77	-0.00259508		1354.77	-0.00341784		1354.77	-0.00198417		1354.77	-0.00258081		1354.77	-0.0035762		1354.77	-0.00255249		1354.77	-0.00229446		1354.77	-0.00239029		1354.77	-0.00156772		1354.77	-0.00131059
	1355.25	-0.00339434		1355.25	-0.00182701		1355.25	-0.00258282		1355.25	-0.00343014		1355.25	-0.00191598		1355.25	-0.00241718		1355.25	-0.00313063		1355.25	-0.00229433		1355.25	-0.00204983		1355.25	-0.00217292		1355.25	-0.00157056		1355.25	-0.00105953
	1355.73	-0.00305871		1355.73	-0.00181665		1355.73	-0.0024613		1355.73	-0.00337008		1355.73	-0.00184324		1355.73	-0.00219778		1355.73	-0.00265409		1355.73	-0.00206942		1355.73	-0.00179728		1355.73	-0.00187283		1355.73	-0.00156736		1355.73	-0.000840162
	1356.22	-0.00263634		1356.22	-0.00187392		1356.22	-0.00224554		1356.22	-0.00324611		1356.22	-0.00175586		1356.22	-0.00191536		1356.22	-0.00220414		1356.22	-0.00188398		1356.22	-0.00153761		1356.22	-0.00152434		1356.22	-0.00153883		1356.22	-0.000644509
	1356.7	-0.00217615		1356.7	-0.00197968		1356.7	-0.00196217		1356.7	-0.00307111		1356.7	-0.00164005		1356.7	-0.00156736		1356.7	-0.0018181		1356.7	-0.0017321		1356.7	-0.00127339		1356.7	-0.00116198		1356.7	-0.00147335		1356.7	-0.000464258
	1357.18	-0.00174035		1357.18	-0.00210642		1357.18	-0.00164236		1357.18	-0.00285744		1357.18	-0.00147686		1357.18	-0.0011598		1357.18	-0.00150694		1357.18	-0.00159568		1357.18	-0.00100859		1357.18	-0.000811092		1357.18	-0.00136784		1357.18	-0.000297276
	1357.66	-0.00138161		1357.66	-0.00222359		1357.66	-0.00131029		1357.66	-0.00261128		1357.66	-0.00124561		1357.66	-0.000706373		1357.66	-0.00125698		1357.66	-0.00145014		1357.66	-0.00074663		1357.66	-0.000479549		1357.66	-0.00122423		1357.66	-0.000148879
	1358.14	-0.00112437		1358.14	-0.00229634		1358.14	-0.000976422		1358.14	-0.0023285		1358.14	-0.000923061		1358.14	-0.000225319		1358.14	-0.00103606		1358.14	-0.00126738		1358.14	-0.00048266		1358.14	-0.000157723		1358.14	-0.001043		1358.14	-2.3392e-05
	1358.63	-0.000955958		1358.63	-0.00228984		1358.63	-0.000634219		1358.63	-0.00199393		1358.63	-0.000491299		1358.63	0.000267275		1358.63	-0.000804346		1358.63	-0.00102373		1358.63	-0.000201077		1358.63	0.000176442		1358.63	-0.000820121		1358.63	8.3307e-05
	1359.11	-0.000829877		1359.11	-0.00217368		1359.11	-0.000260554		1359.11	-0.00158231		1359.11	6.11366e-05		1359.11	0.000765673		1359.11	-0.000522905		1359.11	-0.000702139		1359.11	0.000126226		1359.11	0.000549909		1359.11	-0.000544448		1359.11	0.000192353
	1359.59	-0.000681264		1359.59	-0.00193		1359.59	0.00017664		1359.59	-0.00106339		1359.59	0.000731752		1359.59	0.00127574		1359.59	-0.000165639		1359.59	-0.000294164		1359.59	0.000534715		1359.59	0.000984367		1359.59	-0.000200216		1359.59	0.000342774
	1360.07	-0.000448536		1360.07	-0.0015592		1360.07	0.000707657		1360.07	-0.000407523		1360.07	0.00150277		1360.07	0.00181296		1360.07	0.000276326		1360.07	0.000202231		1360.07	0.00105893		1360.07	0.00148771		1360.07	0.000227326		1360.07	0.000584414
	1360.56	-9.42561e-05		1360.56	-0.00108597		1360.56	0.00134823		1360.56	0.000404523		1360.56	0.00233553		1360.56	0.00239223		1360.56	0.00079017		1360.56	0.000784859		1360.56	0.00171921		1360.56	0.00204763		1360.56	0.000742771		1360.56	0.000965804
	1361.04	0.000378489		1361.04	-0.00056116		1361.04	0.00208335		1361.04	0.00136694		1361.04	0.0031645		1361.04	0.0030084		1361.04	0.00134118		1361.04	0.00144559		1361.04	0.00250612		1361.04	0.00262538		1361.04	0.00132985		1361.04	0.00151205
	1361.52	0.000919282		1361.52	-5.68543e-05		1361.52	0.00285625		1361.52	0.00242891		1361.52	0.00389559		1361.52	0.00361996		1361.52	0.00187422		1361.52	0.0021603		1361.52	0.0033617		1361.52	0.0031591		1361.52	0.00194221		1361.52	0.00219763
	1362	0.0014411		1362	0.000355541		1362	0.00356878		1362	0.00348533		1362	0.00442365		1362	0.00414129		1362	0.00232776		1362	0.0028802		1362	0.00417776		1362	0.00357673		1362	0.00250475		1362	0.00292723
	1362.48	0.00185765		1362.48	0.00064175		1362.48	0.00411634		1362.48	0.0043973		1362.48	0.00467444		1362.48	0.00447078		1362.48	0.00266128		1362.48	0.00353203		1362.48	0.0048236		1362.48	0.00382863		1362.48	0.00294051		1362.48	0.00355154
	1362.97	0.0021306		1362.97	0.000831532		1362.97	0.00444049		1362.97	0.00505451		1362.97	0.00465283		1362.97	0.00454698		1362.97	0.00287973		1362.97	0.00404068		1362.97	0.00520944		1362.97	0.00391906		1362.97	0.0032106		1362.97	0.00393398
	1363.45	0.00229152		1363.45	0.00100512		1363.45	0.0045662		1363.45	0.00543421		1363.45	0.00444444		1363.45	0.00439262		1363.45	0.00303579		1363.45	0.00436437		1363.45	0.00533581		1363.45	0.00390602		1363.45	0.00333903		1363.45	0.00402804
	1363.93	0.00241168		1363.93	0.00124547		1363.93	0.00457705		1363.93	0.00560126		1363.93	0.00416705		1363.93	0.00409824		1363.93	0.00319898		1363.93	0.00450727		1363.93	0.00528087		1363.93	0.00386644		1363.93	0.00339212		1363.93	0.00389255
	1364.41	0.00255811		1364.41	0.00159844		1364.41	0.00456369		1364.41	0.00565862		1364.41	0.00391368		1364.41	0.00377281		1364.41	0.00342502		1364.41	0.00450647		1364.41	0.00514643		1364.41	0.00385915		1364.41	0.00343898		1364.41	0.00364549
	1364.89	0.00276981		1364.89	0.00206694		1364.89	0.00458783		1364.89	0.0056976		1364.89	0.00373297		1364.89	0.0035025		1364.89	0.00374541		1364.89	0.00440999		1364.89	0.00501666		1364.89	0.00391315		1364.89	0.00352518		1364.89	0.00340882
	1365.38	0.00306182		1365.38	0.00262654		1365.38	0.00467778		1365.38	0.00577858		1365.38	0.00363974		1365.38	0.0033414		1365.38	0.00417197		1365.38	0.00426414		1365.38	0.00494604		1365.38	0.0040374		1365.38	0.00367082		1365.38	0.00328017
	1365.86	0.00343747		1365.86	0.00324451		1365.86	0.00483828		1365.86	0.00593461		1365.86	0.00363643		1365.86	0.00331753		1365.86	0.00470575		1365.86	0.00411346		1365.86	0.00496873		1365.86	0.00423369		1365.86	0.00387958		1365.86	0.00332941
	1366.34	0.00389967		1366.34	0.00389305		1366.34	0.00506326		1366.34	0.00617979		1366.34	0.00372763		1366.34	0.00344255		1366.34	0.00534068		1366.34	0.00400299		1366.34	0.00510955		1366.34	0.00450687		1366.34	0.00415009		1366.34	0.00360145
	1366.82	0.0044507		1366.82	0.00455609		1366.82	0.00534229		1366.82	0.00651547		1366.82	0.00392682		1366.82	0.00371386		1366.82	0.00605831		1366.82	0.00397868		1366.82	0.00538758		1366.82	0.00486344		1366.82	0.00448019		1366.82	0.00411196
	1367.31	0.00508719		1367.31	0.00523016		1367.31	0.00566497		1367.31	0.00693368		1367.31	0.00425464		1367.31	0.0041145		1367.31	0.00682354		1367.31	0.00408152		1367.31	0.00581226		1367.31	0.00530703		1367.31	0.00486977		1367.31	0.00484049
	1367.79	0.0057857		1367.79	0.00591547		1367.79	0.00601631		1367.79	0.00741239		1367.79	0.00472478		1367.79	0.00460812		1367.79	0.00757727		1367.79	0.00433438		1367.79	0.00636968		1367.79	0.00582341		1367.79	0.00531284		1367.79	0.00572026
	1368.27	0.00649542		1368.27	0.00660128		1368.27	0.00637463		1368.27	0.00791458		1368.27	0.00532766		1368.27	0.00513976		1368.27	0.0082411		1368.27	0.00472816		1368.27	0.00701045		1368.27	0.00637264		1368.27	0.00579225		1368.27	0.00664263
	1368.75	0.00714281		1368.75	0.00725394		1368.75	0.00670982		1368.75	0.00838903		1368.75	0.00601957		1368.75	0.00564473		1368.75	0.008734		1368.75	0.00521638		1368.75	0.00765314		1368.75	0.00688881		1368.75	0.00627313		1368.75	0.00748183
	1369.23	0.00765695		1369.23	0.00781649		1369.23	0.00699062		1369.23	0.0087817		1369.23	0.0067253		1369.23	0.00606483		1369.23	0.00899747		1369.23	0.00572593		1369.23	0.00820426		1369.23	0.00729869		1369.23	0.00671194		1369.23	0.00813359
	1369.72	0.00799729		1369.72	0.00822384		1369.72	0.00719209		1369.72	0.00904889		1369.72	0.00736035		1369.72	0.00636703		1369.72	0.00901425		1369.72	0.00618103		1369.72	0.00858909		1369.72	0.00754571		1369.72	0.00706911		1369.72	0.00854779
	1370.2	0.00817127		1370.2	0.0084271		1370.2	0.00730603		1370.2	0.00916809		1370.2	0.00785489		1370.2	0.00654934		1370.2	0.00881169		1370.2	0.00652606		1370.2	0.00877568		1370.2	0.00760964		1370.2	0.00732497		1370.2	0.00873785
	1370.68	0.00822975		1370.68	0.00841055		1370.68	0.00734084		1370.68	0.00914153		1370.68	0.00817147		1370.68	0.00663889		1370.68	0.00844768		1370.68	0.00673835		1370.68	0.00877788		1370.68	0.00750907		1370.68	0.0074883		1370.68	0.00876334
	1371.16	0.00824589		1371.16	0.00819392		1371.16	0.00731678		1371.16	0.00899134		1371.16	0.00830472		1371.16	0.00667799		1371.16	0.0079906		1371.16	0.00682502		1371.16	0.00864063		1371.16	0.00728959		1371.16	0.0075913		1371.16	0.00870107
	1371.64	0.00828976		1371.64	0.00782918		1371.64	0.00725768		1371.64	0.00875208		1371.64	0.00827504		1371.64	0.00671275		1371.64	0.00750536		1371.64	0.00681445		1371.64	0.00841866		1371.64	0.00700904		1371.64	0.00768167		1371.64	0.0086188
	1372.13	0.00840751		1372.13	0.0073918		1372.13	0.00718549		1372.13	0.00846856		1372.13	0.00811803		1372.13	0.0067814		1372.13	0.00704786		1372.13	0.00674737		1372.13	0.00815651		1372.13	0.00672547		1372.13	0.00780927		1372.13	0.00855989
	1372.61	0.00860409		1372.61	0.0069753		1372.61	0.00711704		1372.61	0.00819419		1372.61	0.00788282		1372.61	0.00690715		1372.61	0.0066683		1372.61	0.00667287		1372.61	0.00787739		1372.61	0.00648997		1372.61	0.0080118		1372.61	0.00853745
	1373.09	0.00883519		1373.09	0.0066795		1373.09	0.0070679		1373.09	0.00799121		1373.09	0.0076296		1373.09	0.00709094		1373.09	0.0064132		1373.09	0.00664219		1373.09	0.00757838		1373.09	0.00634396		1373.09	0.00829837		1373.09	0.0085358
	1373.57	0.00901479		1373.57	0.00658718		1373.57	0.00705642		1373.57	0.00792254		1373.57	0.00743002		1373.57	0.00730846		1373.57	0.00632292		1373.57	0.00670087		1373.57	0.00724242		1373.57	0.00631216		1373.57	0.00863495		1373.57	0.00852491
	1374.06	0.00905315		1374.06	0.00672486		1374.06	0.00710899		1374.06	0.00802834		1374.06	0.0073518		1374.06	0.0075178		1374.06	0.0064135		1374.06	0.00687039		1374.06	0.00686013		1374.06	0.00639625		1374.06	0.00894954		1374.06	0.00848288
	1374.54	0.00891051		1374.54	0.00703756		1374.54	0.00725455		1374.54	0.00830226		1374.54	0.00743248		1374.54	0.00768376		1374.54	0.00666022		1374.54	0.00713482		1374.54	0.00645604		1374.54	0.00657326		1374.54	0.00916684		1374.54	0.00841727
	1375.02	0.00862194		1375.02	0.00740943		1375.02	0.00750866		1375.02	0.00868745		1375.02	0.00765891		1375.02	0.00779764		1375.02	0.0069952		1375.02	0.0074431		1375.02	0.00608502		1375.02	0.00680587		1375.02	0.00925335		1375.02	0.0083619
	1375.5	0.00826376		1375.5	0.00772788		1375.5	0.00786241		1375.5	0.00910688		1375.5	0.00798109		1375.5	0.00787807		1375.5	0.00733667		1375.5	0.0077384		1375.5	0.00580638		1375.5	0.00705928		1375.5	0.00923351		1375.5	0.00834948
	1375.98	0.0079004		1375.98	0.00792841		1375.98	0.00828166		1375.98	0.00949573		1375.98	0.00833799		1375.98	0.00795045		1375.98	0.00761541		1375.98	0.00797944		1375.98	0.0056547		1375.98	0.00731106		1375.98	0.0091621		1375.98	0.00838798
	1376.47	0.00755765		1376.47	0.00800097		1376.47	0.00871314		1376.47	0.00981558		1376.47	0.00868075		1376.47	0.00802915		1376.47	0.00779038		1376.47	0.00814973		1376.47	0.00563378		1376.47	0.00754703		1376.47	0.00908912		1376.47	0.00845629
	1376.95	0.00723349		1376.95	0.00797096		1376.95	0.00909358		1376.95	0.0100477		1376.95	0.00897633		1376.95	0.00811057		1376.95	0.0078448		1376.95	0.00825113		1376.95	0.00572412		1376.95	0.00775783		1376.95	0.00904155		1376.95	0.00851647
	1377.43	0.0069216		1377.43	0.00788336		1377.43	0.00935639		1377.43	0.0101883		1377.43	0.00920843		1377.43	0.00817755		1377.43	0.00778752		1377.43	0.00829918		1377.43	0.00589545		1377.43	0.00793469		1377.43	0.00901908		1377.43	0.008531
	1377.91	0.00663408		1377.91	0.00779082		1377.91	0.00944747		1377.91	0.0102443		1377.91	0.00937627		1377.91	0.00820787		1377.91	0.0076524		1377.91	0.00831999		1377.91	0.006116		1377.91	0.00807222		1377.91	0.00900058		1377.91	0.00847829
	1378.39	0.0064103		1378.39	0.00774353		1378.39	0.00934285		1378.39	0.010233		1378.39	0.00949621		1378.39	0.00818592		1378.39	0.00749511		1378.39	0.00834644		1378.39	0.00636215		1378.39	0.00817127		1378.39	0.00895451		1378.39	0.0083637
	1378.88	0.00630651		1378.88	0.00777554		1378.88	0.00906438		1378.88	0.0101804		1378.88	0.00959565		1378.88	0.00810962		1378.88	0.00737967		1378.88	0.00840916		1378.88	0.00662392		1378.88	0.00824089		1378.88	0.00884967		1378.88	0.00821959
	1379.36	0.00636881		1379.36	0.00789392		1379.36	0.00867977		1379.36	0.0101115		1379.36	0.00970497		1379.36	0.00799219		1379.36	0.00735624		1379.36	0.00852623		1379.36	0.00690537		1379.36	0.00829365		1379.36	0.00866777		1379.36	0.00808893
	1379.84	0.00660585		1379.84	0.00807428		1379.84	0.00828263		1379.84	0.0100421		1379.84	0.00984103		1379.84	0.00785614		1379.84	0.0074406		1379.84	0.00869451		1379.84	0.00721628		1379.84	0.00833982		1379.84	0.0084092		1379.84	0.00800468
	1380.32	0.0069754		1380.32	0.00826892		1380.32	0.00796378		1380.32	0.00997229		1380.32	0.00999772		1380.32	0.00772221		1380.32	0.00760893		1380.32	0.00889048		1380.32	0.00756254		1380.32	0.00838028		1380.32	0.00809183		1380.32	0.0079743
	1380.81	0.00739507		1380.81	0.00842389		1380.81	0.00778731		1380.81	0.00988876		1380.81	0.0101436		1380.81	0.00760455		1380.81	0.00780715		1380.81	0.0090768		1380.81	0.00793546		1380.81	0.00840747		1380.81	0.00774741		1380.81	0.00797829
	1381.29	0.00776637		1381.29	0.00849626		1381.29	0.00777986		1381.29	0.00977539		1381.29	0.0102328		1381.29	0.00751062		1381.29	0.00797532		1381.29	0.00921632		1381.29	0.00830932		1381.29	0.0084116		1381.29	0.00741536		1381.29	0.00798483
	1381.77	0.00800809		1381.77	0.00846964		1381.77	0.00792952		1381.77	0.00962553		1381.77	0.0102214		1381.77	0.00744644		1381.77	0.00807104		1381.77	0.00928571		1381.77	0.00864776		1381.77	0.00839065		1381.77	0.00713671		1381.77	0.00796961
	1382.25	0.00807961		1382.25	0.00835654		1382.25	0.00819352		1382.25	0.00945001		1382.25	0.0100868		1382.25	0.00742109		1382.25	0.00808643		1382.25	0.00928324		1382.25	0.00891517		1382.25	0.00835758		1382.25	0.00694587		1382.25	0.00793054
	1382.73	0.00799138		1382.73	0.00819153		1382.73	0.00851055		1382.73	0.0092784		1382.73	0.00983836		1382.73	0.00744873		1382.73	0.00805065		1382.73	0.00923043		1382.73	0.00908983		1382.73	0.0083414		1382.73	0.00686181		1382.73	0.00789288
	1383.22	0.00779204		1383.22	0.00801575		1383.22	0.00881511		1383.22	0.00914867		1383.22	0.00951591		1383.22	0.00754541		1383.22	0.00801896		1383.22	0.00916315		1383.22	0.00917212		1383.22	0.00837863		1383.22	0.00688278		1383.22	0.00789764
	1383.7	0.00754575		1383.7	0.00785944		1383.7	0.00905153		1383.7	0.00909504		1383.7	0.00917733		1383.7	0.0077242		1383.7	0.00805227		1383.7	0.00911899		1383.7	0.0091839		1383.7	0.00850417		1383.7	0.00698843		1383.7	0.00798602
	1384.18	0.00730654		1384.18	0.00773135		1384.18	0.00918065		1384.18	0.00913642		1384.18	0.00888301		1384.18	0.00799003		1384.18	0.00820129		1384.18	0.00912688		1384.18	0.00916251		1384.18	0.0087393		1384.18	0.00714735		1384.18	0.00818609
	1384.66	0.00710953		1384.66	0.00762131		1384.66	0.00918698		1384.66	0.00927261		1384.66	0.00868471		1384.66	0.00833765		1384.66	0.00849701		1384.66	0.00920194		1384.66	0.00915378		1384.66	0.00908878		1384.66	0.00732999		1384.66	0.00850887
	1385.14	0.00697099		1385.14	0.00750678		1385.14	0.0090793		1385.14	0.00948286		1385.14	0.0086218		1385.14	0.0087487		1385.14	0.00894754		1385.14	0.00934458		1385.14	0.00920772		1385.14	0.00953522		1385.14	0.00751901		1385.14	0.00894832
	1385.63	0.00689874		1385.63	0.00736878		1385.63	0.0088987		1385.63	0.00972964		1385.63	0.00871774		1385.63	0.00918749		1385.63	0.00953644		1385.63	0.00954271		1385.63	0.00937376		1385.63	0.010038		1385.63	0.00771763		1385.63	0.0094855
	1386.11	0.00689524		1386.11	0.00720219		1386.11	0.00871408		1386.11	0.00996025		1386.11	0.00897152		1386.11	0.00959724		1386.11	0.0102139		1386.11	0.00977003		1386.11	0.00968597		1386.11	0.010529		1386.11	0.00794842		1386.11	0.0100843
	1386.59	0.00695536		1386.59	0.00702166		1386.59	0.00860653		1386.59	0.0101205		1386.59	0.00934586		1386.59	0.00990188		1386.59	0.0108958		1386.59	0.00998589		1386.59	0.01014		1386.59	0.0109237		1386.59	0.00823981		1386.59	0.0106855
	1387.07	0.00705015		1387.07	0.006851		1387.07	0.00862343		1387.07	0.0101701		1387.07	0.00976353		1387.07	0.0100242		1387.07	0.0114748		1387.07	0.0101409		1387.07	0.0106704		1387.07	0.011144		1387.07	0.00859774		1387.07	0.0112026
	1387.56	0.00712233		1387.56	0.00670009		1387.56	0.00873971		1387.56	0.0100989		1387.56	0.0101238		1387.56	0.00991429		1387.56	0.0118584		1387.56	0.0101895		1387.56	0.0111559		1387.56	0.0111553		1387.56	0.0089836		1387.56	0.0115343
	1388.04	0.00709862		1388.04	0.00655149		1388.04	0.00885643		1388.04	0.00992635		1388.04	0.0103428		1388.04	0.00956953		1388.04	0.0120054		1388.04	0.0101068		1388.04	0.0114703		1388.04	0.0109782		1388.04	0.00932244		1388.04	0.0115953
	1388.52	0.0069256		1388.52	0.00636972		1388.52	0.00885572		1388.52	0.00968485		1388.52	0.0103791		1388.52	0.00902967		1388.52	0.0119318		1388.52	0.00989367		1388.52	0.0115352		1388.52	0.0106726		1388.52	0.00954098		1388.52	0.0113418
	1389	0.00659172		1389	0.00612726		1389	0.00865621		1389	0.00940484		1389	0.0102373		1389	0.00835792		1389	0.011691		1389	0.00957455		1389	0.0113442		1389	0.0103056		1389	0.00960235		1389	0.0107839
	1389.48	0.00613186		1389.48	0.00582368		1389.48	0.00824127		1389.48	0.00910989		1389.48	0.00994808		1389.48	0.00762434		1389.48	0.0113471		1389.48	0.00918847		1389.48	0.0109492		1389.48	0.00993198		1389.48	0.00951686		1389.48	0.00998002
	1389.96	0.00561324		1389.96	0.00549014		1389.96	0.00765334		1389.96	0.00882035		1389.96	0.00955442		1389.96	0.00690096		1389.96	0.0109602		1389.96	0.00878349		1389.96	0.0104361		1389.96	0.00958911		1389.96	0.00933151		1389.96	0.00902818
	1390.45	0.00511331		1390.45	0.00517604		1390.45	0.00696947		1390.45	0.00855479		1390.45	0.00909578		1390.45	0.00625464		1390.45	0.0105773		1390.45	0.00840805		1390.45	0.0098973		1390.45	0.00929813		1390.45	0.00910904		1390.45	0.00805082
	1390.93	0.0046949		1390.93	0.00493431		1390.93	0.00627484		1390.93	0.00832789		1390.93	0.00860301		1390.93	0.00574087		1390.93	0.0102287		1390.93	0.00810334		1390.93	0.00941077		1390.93	0.00906239		1390.93	0.0089055		1390.93	0.00717562
	1391.41	0.0043876		1391.41	0.00480052		1391.41	0.00563912		1391.41	0.00814227		1391.41	0.00808876		1391.41	0.0053922		1391.41	0.00992188		1391.41	0.00789072		1391.41	0.00901993		1391.41	0.00886526		1391.41	0.00874911		1391.41	0.00651399
	1391.89	0.00417484		1391.89	0.00477981		1391.89	0.00510033		1391.89	0.00798139		1391.89	0.00754622		1391.89	0.00521001		1391.89	0.00963979		1391.89	0.00776437		1391.89	0.00872362		1391.89	0.00866625		1391.89	0.0086263		1391.89	0.00614255
	1392.38	0.00399363		1392.38	0.0048357		1392.38	0.00465899		1392.38	0.00779888		1392.38	0.00694469		1392.38	0.00515623		1392.38	0.00933598		1392.38	0.00768103		1392.38	0.00846849		1392.38	0.00840204		1392.38	0.00847687		1392.38	0.0060869
	1392.86	0.00374627		1392.86	0.00488948		1392.86	0.00428114		1392.86	0.00751699		1392.86	0.00623783		1392.86	0.00515244		1392.86	0.00894064		1392.86	0.00755711		1392.86	0.00815675		1392.86	0.00799175		1392.86	0.00819926		1392.86	0.00631397
	1393.34	0.00332881		1393.34	0.00482916		1393.34	0.00391308		1393.34	0.00703392		1393.34	0.00537872		1393.34	0.0050879		1393.34	0.00837349		1393.34	0.00727689		1393.34	0.00766808		1393.34	0.00735938		1393.34	0.00767719		1393.34	0.0067254
	1393.82	0.00267518		1393.82	0.00453821		1393.82	0.0035022		1393.82	0.00625521		1393.82	0.00435426		1393.82	0.00484749		1393.82	0.00757515		1393.82	0.00672123		1393.82	0.00691052		1393.82	0.00647215		1393.82	0.00682946		1393.82	0.00716393
	1394.31	0.00180837		1394.31	0.00394738		1394.31	0.00302598		1394.31	0.0051517		1394.31	0.00321828		1394.31	0.00436243		1394.31	0.00655129		1394.31	0.00582714		1394.31	0.00588651		1394.31	0.00539019		1394.31	0.00567641		1394.31	0.0074466
	1394.79	0.000855402		1394.79	0.00308815		1394.79	0.00250435		1394.79	0.00381018		1394.79	0.00210433		1394.79	0.00366614		1394.79	0.00540341		1394.79	0.00464865		1394.79	0.00473707		1394.79	0.0042792		1394.79	0.00437464		1394.79	0.00743012
	1395.27	-1.02383e-05		1395.27	0.00209547		1395.27	0.00198488		1395.27	0.00242468		1395.27	0.00117506		1395.27	0.00289841		1395.27	0.00430139		1395.27	0.00336344		1395.27	0.00369301		1395.27	0.00335349		1395.27	0.00316133		1395.27	0.0070778
	1395.75	-0.000667535		1395.75	0.00113732		1395.75	0.00150317		1395.75	0.00120693		1395.75	0.000546558		1395.75	0.00223983		1395.75	0.00340825		1395.75	0.00219577		1395.75	0.00295802		1395.75	0.00276847		1395.75	0.00222997		1395.75	0.00646542
	1396.23	-0.0011015		1396.23	0.000333092		1396.23	0.00106022		1396.23	0.000292042		1396.23	0.000243902		1396.23	0.00182674		1396.23	0.00281283		1396.23	0.00131832		1396.23	0.00261204		1396.23	0.00255901		1396.23	0.00164573		1396.23	0.00571925
	1396.71	-0.00137557		1396.71	-0.000275919		1396.71	0.000629506		1396.71	-0.000282111		1396.71	0.000224044		1396.71	0.00171588		1396.71	0.00252745		1396.71	0.000817125		1396.71	0.00261388		1396.71	0.00265881		1396.71	0.00136259		1396.71	0.00495248
	1397.2	-0.0015627		1397.2	-0.000696846		1397.2	0.00019169		1397.2	-0.00054051		1397.2	0.000420641		1397.2	0.00190231		1397.2	0.00252225		1397.2	0.000715356		1397.2	0.00286208		1397.2	0.00296106		1397.2	0.00129671		1397.2	0.00424929
	1397.68	-0.00170085		1397.68	-0.000947064		1397.68	-0.000240983		1397.68	-0.000527273		1397.68	0.000773341		1397.68	0.00234532		1397.68	0.00274857		1397.68	0.00100386		1397.68	0.00325212		1397.68	0.00335796		1397.68	0.00139077		1397.68	0.00367994
	1398.16	-0.00177669		1398.16	-0.00103381		1398.16	-0.000611092		1398.16	-0.000285323		1398.16	0.00122995		1398.16	0.00297607		1398.16	0.00314131		1398.16	0.00164597		1398.16	0.0037028		1398.16	0.00376155		1398.16	0.00163792		1398.16	0.0033189
	1398.64	-0.0017485		1398.64	-0.000956883		1398.64	-0.000835267		1398.64	0.000139948		1398.64	0.00173671		1398.64	0.00369621		1398.64	0.00360874		1398.64	0.00255535		1398.64	0.00416317		1398.64	0.00410694		1398.64	0.00206405		1398.64	0.00323263
	1399.13	-0.00158594		1399.13	-0.000729926		1399.13	-0.000846577		1399.13	0.000691428		1399.13	0.00223353		1399.13	0.00438602		1399.13	0.00403827		1399.13	0.00358401		1399.13	0.00460384		1399.13	0.00435908		1399.13	0.00268325		1399.13	0.00344018
	1399.61	-0.0013094		1399.61	-0.000396169		1399.61	-0.000642954		1399.61	0.00130007		1399.61	0.00266641		1399.61	0.0049376		1399.61	0.00433304		1399.61	0.00455274		1399.61	0.00500798		1399.61	0.00451326		1399.61	0.00345437		1399.61	0.00388138
	1400.09	-0.000981877		1400.09	-1.86209e-05		1400.09	-0.000287707		1400.09	0.00190354		1400.09	0.00300596		1400.09	0.00529473		1400.09	0.00445056		1400.09	0.00531411		1400.09	0.00536396		1400.09	0.00459242		1400.09	0.00428435		1400.09	0.00443161
	1400.57	-0.00067617		1400.57	0.000344333		1400.57	0.000125497		1400.57	0.00246267		1400.57	0.00325727		1400.57	0.005464		1400.57	0.00441555		1400.57	0.00580014		1400.57	0.0056644		1400.57	0.00462782		1400.57	0.00506661		1400.57	0.00495462
	1401.05	-0.000437811		1401.05	0.000657612		1401.05	0.000522241		1401.05	0.00296549		1401.05	0.00344689		1401.05	0.00549259		1401.05	0.00429326		1401.05	0.00601631		1401.05	0.00590569		1401.05	0.0046461		1401.05	0.00572029		1401.05	0.0053497
	1401.54	-0.000278336		1401.54	0.000910815		1401.54	0.000865295		1401.54	0.00341393		1401.54	0.00360757		1401.54	0.00543941		1401.54	0.00415614		1401.54	0.00601087		1401.54	0.00608653		1401.54	0.00465946		1401.54	0.00620157		1401.54	0.00556357
	1402.02	-0.000183954		1402.02	0.00110656		1402.02	0.00115088		1402.02	0.00381152		1402.02	0.00375961		1402.02	0.00535158		1402.02	0.00405908		1402.02	0.00583966		1402.02	0.00620486		1402.02	0.00466348		1402.02	0.00649448		1402.02	0.00558035
	1402.5	-0.000134901		1402.5	0.00125125		1402.5	0.00139084		1402.5	0.00414959		1402.5	0.00390188		1402.5	0.00525525		1402.5	0.00402623		1402.5	0.00555169		1402.5	0.00625239		1402.5	0.00463605		1402.5	0.00659428		1402.5	0.00540431
	1402.98	-0.000114761		1402.98	0.00134563		1402.98	0.00159764		1402.98	0.00440082		1402.98	0.00400486		1402.98	0.00515234		1402.98	0.00404433		1402.98	0.0051862		1402.98	0.00621004		1402.98	0.00454025		1402.98	0.00649761		1402.98	0.0050537
	1403.46	-0.000120459		1403.46	0.00138273		1403.46	0.00176632		1403.46	0.00451906		1403.46	0.00401149		1403.46	0.00502156		1403.46	0.00406356		1403.46	0.004776		1403.46	0.00605095		1403.46	0.0043305		1403.46	0.00619988		1403.46	0.00456365
	1403.95	-0.00015653		1403.95	0.00135089		1403.95	0.00187016		1403.95	0.00445093		1403.95	0.00385223		1403.95	0.0048285		1403.95	0.00400905		1403.95	0.00435122		1403.95	0.00574886		1403.95	0.003974		1403.95	0.00570891		1403.95	0.0039965
	1404.43	-0.000222869		1404.43	0.0012452		1404.43	0.0018657		1404.43	0.0041628		1404.43	0.0034824		1404.43	0.00454819		1404.43	0.0038174		1404.43	0.00394143		1404.43	0.00530267		1404.43	0.00347732		1404.43	0.00506185		1404.43	0.00344532
	1404.91	-0.000298468		1404.91	0.00107836		1404.91	0.00172004		1404.91	0.00366824		1404.91	0.00292062		1404.91	0.0041898		1404.91	0.00347932		1404.91	0.00357028		1404.91	0.00475422		1404.91	0.00290601		1404.91	0.00433676		1404.91	0.00301901
	1405.39	-0.000340584		1405.39	0.000881132		1405.39	0.00143808		1405.39	0.00303209		1405.39	0.00225665		1405.39	0.00380437		1405.39	0.00305855		1405.39	0.00324819		1405.39	0.00418572		1405.39	0.00236667		1405.39	0.00363463		1405.39	0.00280466
	1405.88	-0.000306117		1405.88	0.000685919		1405.88	0.00106677		1405.88	0.00233959		1405.88	0.00160902		1405.88	0.00345915		1405.88	0.00265801		1405.88	0.00296703		1405.88	0.00368572		1405.88	0.00195922		1405.88	0.00304256		1405.88	0.0028322
	1406.36	-0.000180013		1406.36	0.000510232		1406.36	0.000673209		1406.36	0.00165618		1406.36	0.00106766		1406.36	0.00320055		1406.36	0.00236468		1406.36	0.00270659		1406.36	0.00331175		1406.36	0.00173495		1406.36	0.00260111		1406.36	0.00306642
	1406.84	1.3784e-05		1406.84	0.000350335		1406.84	0.000318568		1406.84	0.00101167		1406.84	0.000664182		1406.84	0.00303159		1406.84	0.00221492		1406.84	0.00244211		1406.84	0.00307203		1406.84	0.00168891		1406.84	0.00230055		1406.84	0.00342709
	1407.32	0.000219237		1407.32	0.000189038		1407.32	4.19497e-05		1407.32	0.000406447		1407.32	0.000376599		1407.32	0.00291302		1407.32	0.00219493		1407.32	0.00215607		1407.32	0.0029341		1407.32	0.0017747		1407.32	0.00209431		1407.32	0.00381142
	1407.8	0.00036801		1407.8	5.96417e-06		1407.8	-0.000138611		1407.8	-0.00016915		1407.8	0.000152278		1407.8	0.00277958		1407.8	0.00226011		1407.8	0.00184141		1407.8	0.0028374		1407.8	0.0019292		1407.8	0.00191862		1407.8	0.0041143
	1408.29	0.000403429		1408.29	-0.000208032		1408.29	-0.000221776		1408.29	-0.000716396		1408.29	-6.37783e-05		1408.29	0.00256308		1408.29	0.00236071		1408.29	0.0015065		1408.29	0.00271432		1408.29	0.00209128		1408.29	0.00171199		1408.29	0.0042436
	1408.77	0.000302652		1408.77	-0.00044549		1408.77	-0.000215318		1408.77	-0.00121871		1408.77	-0.000307209		1408.77	0.00221578		1408.77	0.00245933		1408.77	0.001175		1408.77	0.00250635		1408.77	0.00221378		1408.77	0.00143239		1408.77	0.00413614
	1409.25	8.79467e-05		1409.25	-0.000682025		1409.25	-0.000134271		1409.25	-0.00163998		1409.25	-0.000578069		1409.25	0.00173189		1409.25	0.00253781		1409.25	0.000884286		1409.25	0.00218118		1409.25	0.0022707		1409.25	0.00107182		1409.25	0.00377261
	1409.73	-0.000176105		1409.73	-0.000884969		1409.73	3.97609e-07		1409.73	-0.00193248		1409.73	-0.00083831		1409.73	0.00115775		1409.73	0.00259108		1409.73	0.000676859		1409.73	0.0017432		1409.73	0.00225808		1409.73	0.000663651		1409.73	0.00318653
	1410.21	-0.000408185		1410.21	-0.00102852		1410.21	0.000157979		1410.21	-0.00205517		1410.21	-0.0010233		1410.21	0.00058375		1410.21	0.00261194		1410.21	0.000586968		1410.21	0.00123401		1410.21	0.00218738		1410.21	0.000275066		1410.21	0.00245593
	1410.7	-0.000545011		1410.7	-0.00110924		1410.7	0.000298475		1410.7	-0.00199284		1410.7	-0.00106861		1410.7	0.000116449		1410.7	0.00257491		1410.7	0.000626984		1410.7	0.000716949		1410.7	0.00207516		1410.7	-1.5639e-05		1410.7	0.00168202
	1411.18	-0.000572907		1411.18	-0.00115005		1411.18	0.000376964		1411.18	-0.00176962		1411.18	-0.000939427		1411.18	-0.00016226		1411.18	0.00243381		1411.18	0.000779116		1411.18	0.000254677		1411.18	0.00193206		1411.18	-0.000152191		1411.18	0.000956738
	1411.66	-0.000535083		1411.66	-0.00119278		1411.66	0.000355906		1411.66	-0.00145031		1411.66	-0.000652714		1411.66	-0.000229095		1411.66	0.00213566		1411.66	0.000996157		1411.66	-0.000115954		1411.66	0.0017576		1411.66	-0.00012715		1411.66	0.000333523
	1412.14	-0.000509899		1412.14	-0.00127739		1412.14	0.00021506		1412.14	-0.00112242		1412.14	-0.000273899		1412.14	-0.000127249		1412.14	0.00164899		1412.14	0.00121527		1412.14	-0.000394381		1412.14	0.00154224		1412.14	1.16633e-05		1412.14	-0.000180179
	1412.62	-0.00057165		1412.62	-0.00142402		1412.62	-4.03223e-05		1412.62	-0.000872834		1412.62	0.000105545		1412.62	5.5006e-05		1412.62	0.000987688		1412.62	0.00137458		1412.62	-0.000609239		1412.62	0.00127574		1412.62	0.000181878		1412.62	-0.000608875
	1413.11	-0.000761878		1413.11	-0.00162662		1413.11	-0.000385641		1413.11	-0.000768394		1413.11	0.000396928		1413.11	0.000220696		1413.11	0.000212242		1413.11	0.00142731		1413.11	-0.00079998		1413.11	0.000951857		1413.11	0.000297613		1413.11	-0.000986373
	1413.59	-0.00107847		1413.59	-0.00186007		1413.59	-0.000785957		1413.59	-0.000847503		1413.59	0.000535644		1413.59	0.000296452		1413.59	-0.000586011		1413.59	0.00134487		1413.59	-0.000999398		1413.59	0.000570943		1413.59	0.000297513		1413.59	-0.001335
	1414.07	-0.00149039		1414.07	-0.00209501		1414.07	-0.00121062		1414.07	-0.00112374		1414.07	0.000486614		1414.07	0.000247913		1414.07	-0.00131291		1414.07	0.0011147		1414.07	-0.00122463		1414.07	0.000136965		1414.07	0.000157647		1414.07	-0.00165999
	1414.55	-0.00195465		1414.55	-0.00230919		1414.55	-0.0016387		1414.55	-0.00158938		1414.55	0.000241515		1414.55	7.93301e-05		1414.55	-0.00189444		1414.55	0.000737826		1414.55	-0.00147791		1414.55	-0.00034512		1414.55	-0.000107937		1414.55	-0.00195309
	1415.04	-0.00243524		1415.04	-0.00249533		1415.04	-0.00206292		1415.04	-0.00222164		1415.04	-0.000188823		1415.04	-0.000178158		1415.04	-0.00229169		1415.04	0.000226464		1415.04	-0.00175312		1415.04	-0.000872305		1415.04	-0.000458499		1415.04	-0.00220318
	1415.52	-0.00290658		1415.52	-0.0026592		1415.52	-0.00248136		1415.52	-0.00298086		1415.52	-0.000779904		1415.52	-0.000480079		1415.52	-0.00250521		1415.52	-0.000394182		1415.52	-0.00204508		1415.52	-0.00144162		1415.52	-0.000837384		1415.52	-0.00240637
	1416	-0.0033536		1416	-0.00281523		1416	-0.00289035		1416	-0.0038092		1416	-0.00149436		1416	-0.000783212		1416	-0.00257103		1416	-0.00108253		1416	-0.00235741		1416	-0.0020491		1416	-0.00118947		1416	-0.00257176
	1416.48	-0.00375914		1416.48	-0.00297882		1416.48	-0.00327235		1416.48	-0.00462672		1416.48	-0.0022817		1416.48	-0.00106072		1416.48	-0.00255071		1416.48	-0.00178164		1416.48	-0.00270836		1416.48	-0.00268712		1416.48	-0.00147672		1416.48	-0.00272226
	1416.96	-0.00409778		1416.96	-0.00316132		1416.96	-0.00358994		1416.96	-0.00533108		1416.96	-0.00307361		1416.96	-0.00131287		1416.96	-0.00252106		1416.96	-0.00242015		1416.96	-0.00312961		1416.96	-0.00334101		1416.96	-0.00169676		1416.96	-0.00289071
	1417.45	-0.0043366		1417.45	-0.00337629		1417.45	-0.00379097		1417.45	-0.00580923		1417.45	-0.00378693		1417.45	-0.00158017		1417.45	-0.00256991		1417.45	-0.00293126		1417.45	-0.00366111		1417.45	-0.00399066		1417.45	-0.00190737		1417.45	-0.0031126
	1417.93	-0.00446307		1417.93	-0.00364606		1417.93	-0.00383997		1417.93	-0.0059743		1417.93	-0.00433751		1417.93	-0.00194257		1417.93	-0.00278808		1417.93	-0.00327692		1417.93	-0.00432649		1417.93	-0.00461125		1417.93	-0.00223354		1417.93	-0.00341791
	1418.41	-0.00452256		1418.41	-0.00400668		1418.41	-0.00376249		1418.41	-0.00583127		1418.41	-0.00468048		1418.41	-0.00248621		1418.41	-0.00324693		1418.41	-0.00348503		1418.41	-0.00510155		1418.41	-0.00517677		1418.41	-0.00283025		1418.41	-0.00381754
	1418.89	-0.00463423		1418.89	-0.00448737		1418.89	-0.00367544		1418.89	-0.00552699		1418.89	-0.00485372		1418.89	-0.0032371		1418.89	-0.0039529		1418.89	-0.00364981		1418.89	-0.00589305		1418.89	-0.00566918		1418.89	-0.00377846		1418.89	-0.00429529
	1419.38	-0.00492003		1419.38	-0.00507608		1419.38	-0.00372409		1419.38	-0.00529027		1419.38	-0.00497274		1419.38	-0.00411264		1419.38	-0.0048202		1419.38	-0.00387334		1419.38	-0.0065809		1419.38	-0.00608129		1419.38	-0.0049885		1419.38	-0.00481302
	1419.86	-0.0054091		1419.86	-0.00570905		1419.86	-0.00397907		1419.86	-0.00528402		1419.86	-0.00514658		1419.86	-0.00496763		1419.86	-0.00570748		1419.86	-0.00418301		1419.86	-0.00709018		1419.86	-0.00641407		1419.86	-0.00624613		1419.86	-0.00533026
	1420.34	-0.00602342		1420.34	-0.00630743		1420.34	-0.00440092		1420.34	-0.00553206		1420.34	-0.00541643		1420.34	-0.00568851		1420.34	-0.00649392		1420.34	-0.0045282		1420.34	-0.0074203		1420.34	-0.00666937		1420.34	-0.00735498		1420.34	-0.00582241
	1420.82	-0.00664173		1420.82	-0.00681268		1420.82	-0.00489402		1420.82	-0.00596492		1420.82	-0.00575646		1420.82	-0.00623042		1420.82	-0.00710846		1420.82	-0.00483078		1420.82	-0.00760993		1420.82	-0.00684644		1420.82	-0.00821373		1420.82	-0.00628022
	1421.3	-0.00715736		1421.3	-0.00719796		1421.3	-0.00536607		1421.3	-0.00649699		1421.3	-0.00611808		1421.3	-0.00660169		1421.3	-0.00752335		1421.3	-0.00503232		1421.3	-0.00769952		1421.3	-0.00694513		1421.3	-0.00880189		1421.3	-0.00670229
	1421.79	-0.00750244		1421.79	-0.00746212		1421.79	-0.00575626		1421.79	-0.00706475		1421.79	-0.00645736		1421.79	-0.0068363		1421.79	-0.00773454		1421.79	-0.00511036		1421.79	-0.00771651		1421.79	-0.00697301		1421.79	-0.00913677		1421.79	-0.00709471
	1422.27	-0.00765303		1422.27	-0.0076263		1422.27	-0.00603718		1422.27	-0.00762953		1422.27	-0.00675126		1422.27	-0.00698279		1422.27	-0.0077613		1422.27	-0.00508348		1422.27	-0.00768116		1422.27	-0.00695054		1422.27	-0.00925229		1422.27	-0.00747349
	1422.75	-0.00763959		1422.75	-0.00773217		1422.75	-0.00621843		1422.75	-0.00816817		1422.75	-0.00700235		1422.75	-0.00710579		1422.75	-0.00765603		1422.75	-0.00501365		1422.75	-0.00761898		1422.75	-0.00692018		1422.75	-0.0092013		1422.75	-0.0078695
	1423.23	-0.00755321		1423.23	-0.0078383		1423.23	-0.00634514		1423.23	-0.00866387		1423.23	-0.00724421		1423.23	-0.00728458		1423.23	-0.00751866		1423.23	-0.00500219		1423.23	-0.00757538		1423.23	-0.00694223		1423.23	-0.009065		1423.23	-0.00832767
	1423.71	-0.00753184		1423.71	-0.00800195		1423.71	-0.00648997		1423.71	-0.00910069		1423.71	-0.00753184		1423.71	-0.00759619		1423.71	-0.00748316		1423.71	-0.00515997		1423.71	-0.00761527		1423.71	-0.00707897		1423.71	-0.00895476		1423.71	-0.00889237
	1424.2	-0.00770242		1424.2	-0.00825154		1424.2	-0.00672161		1424.2	-0.00946745		1424.2	-0.0079172		1424.2	-0.00807969		1424.2	-0.0076642		1424.2	-0.00555005		1424.2	-0.00780449		1424.2	-0.00735759		1424.2	-0.00897971		1424.2	-0.0095786
	1424.68	-0.00810906		1424.68	-0.00856743		1424.68	-0.00706958		1424.68	-0.00976311		1424.68	-0.00841481		1424.68	-0.00870943		1424.68	-0.00809159		1424.68	-0.00614242		1424.68	-0.00817634		1424.68	-0.00774721		1424.68	-0.00919575		1424.68	-0.0103532
	1425.16	-0.0086904		1425.16	-0.00889815		1425.16	-0.00751185		1425.16	-0.0099989		1425.16	-0.00899461		1425.16	-0.00940731		1425.16	-0.00869394		1425.16	-0.00682988		1425.16	-0.00871918		1425.16	-0.00817175		1425.16	-0.00958126		1425.16	-0.011147
	1425.64	-0.00932705		1425.64	-0.00919566		1425.64	-0.00800045		1425.64	-0.0101914		1425.64	-0.00960019		1425.64	-0.0100837		1425.64	-0.00934751		1425.64	-0.00749013		1425.64	-0.00939093		1425.64	-0.00855063		1425.64	-0.0100614		1425.64	-0.0118874
	1426.12	-0.00990399		1426.12	-0.0094419		1426.12	-0.00849228		1426.12	-0.0103536		1426.12	-0.0101768		1426.12	-0.0106677		1426.12	-0.00993747		1426.12	-0.00803659		1426.12	-0.0101472		1426.12	-0.00882753		1426.12	-0.0105507		1426.12	-0.0125226
	1426.61	-0.0103417		1426.61	-0.00965188		1426.61	-0.00896433		1426.61	-0.0104892		1426.61	-0.0106838		1426.61	-0.0111145		1426.61	-0.0103873		1426.61	-0.00843122		1426.61	-0.010951		1426.61	-0.00897952		1426.61	-0.0109811		1426.61	-0.0130233
	1427.09	-0.010598		1427.09	-0.00986629		1427.09	-0.00941117		1427.09	-0.0105918		1427.09	-0.0110971		1427.09	-0.0113961		1427.09	-0.010663		1427.09	-0.00867699		1427.09	-0.0117722		1427.09	-0.00900954		1427.09	-0.0113094		1427.09	-0.0133791
	1427.57	-0.0106575		1427.57	-0.0101352		1427.57	-0.00983357		1427.57	-0.010645		1427.57	-0.0114039		1427.57	-0.0114966		1427.57	-0.0107661		1427.57	-0.0088065		1427.57	-0.0125762		1427.57	-0.00894395		1427.57	-0.0115161		1427.57	-0.0135926
	1428.05	-0.0105262		1428.05	-0.0105008		1428.05	-0.0102277		1428.05	-0.0106281		1428.05	-0.0116045		1428.05	-0.0114158		1428.05	-0.0107312		1428.05	-0.00887565		1428.05	-0.0133157		1428.05	-0.00883059		1428.05	-0.0116085		1428.05	-0.0136787
	1428.54	-0.01023		1428.54	-0.0109739		1428.54	-0.010577		1428.54	-0.0105263		1428.54	-0.0117103		1428.54	-0.0111783		1428.54	-0.0106213		1428.54	-0.00895586		1428.54	-0.0139298		1428.54	-0.00873775		1428.54	-0.0116219		1428.54	-0.0136661
	1429.02	-0.00981653		1429.02	-0.011517		1429.02	-0.0108533		1429.02	-0.0103437		1429.02	-0.0117437		1429.02	-0.0108424		1429.02	-0.0105161		1429.02	-0.00912036		1429.02	-0.0143588		1429.02	-0.00874064		1429.02	-0.0116146		1429.02	-0.0135929
	1429.5	-0.00935345		1429.5	-0.0120471		1429.5	-0.011033		1429.5	-0.0101139		1429.5	-0.0117298		1429.5	-0.0104941		1429.5	-0.0104893		1429.5	-0.0094207		1429.5	-0.0145677		1429.5	-0.00890048		1429.5	-0.0116514		1429.5	-0.013499
	1429.98	-0.00891983		1429.98	-0.012468		1429.98	-0.0111164		1429.98	-0.0098934		1429.98	-0.0116892		1429.98	-0.0102236		1429.98	-0.0105843		1429.98	-0.00986881		1429.98	-0.0145646		1429.98	-0.00923802		1429.98	-0.0117762		1429.98	-0.0134163
[truncated: 5,331 more rows]
